# Supplementary material for: Epigenome-Wide Associations of Placental DNA Methylation and Behavioral and Emotional Difficulties in Children at 3 Years of Age
Source: MDPI journal article supplement (doi:10.3390/ijms241411772), 2023-07-21
Supplement: s1 [file s1]

### A. All children together (N=441)

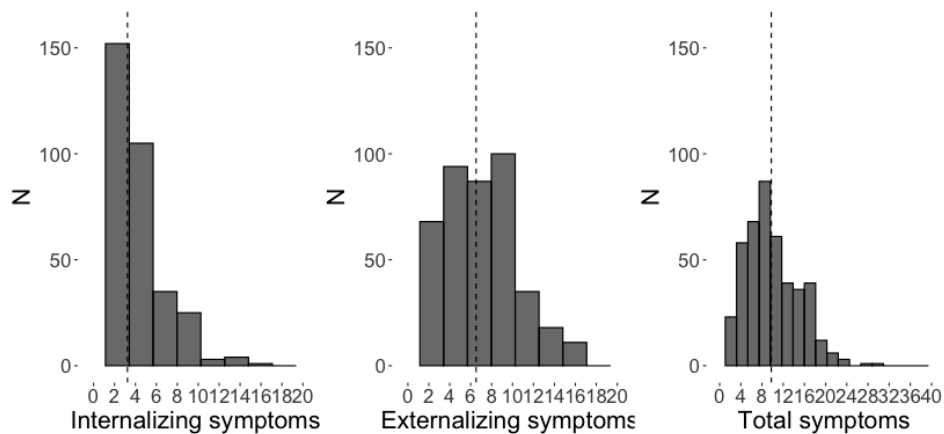

### B. Cohort stratified by child sex (N=228 boys and N=213 girls)

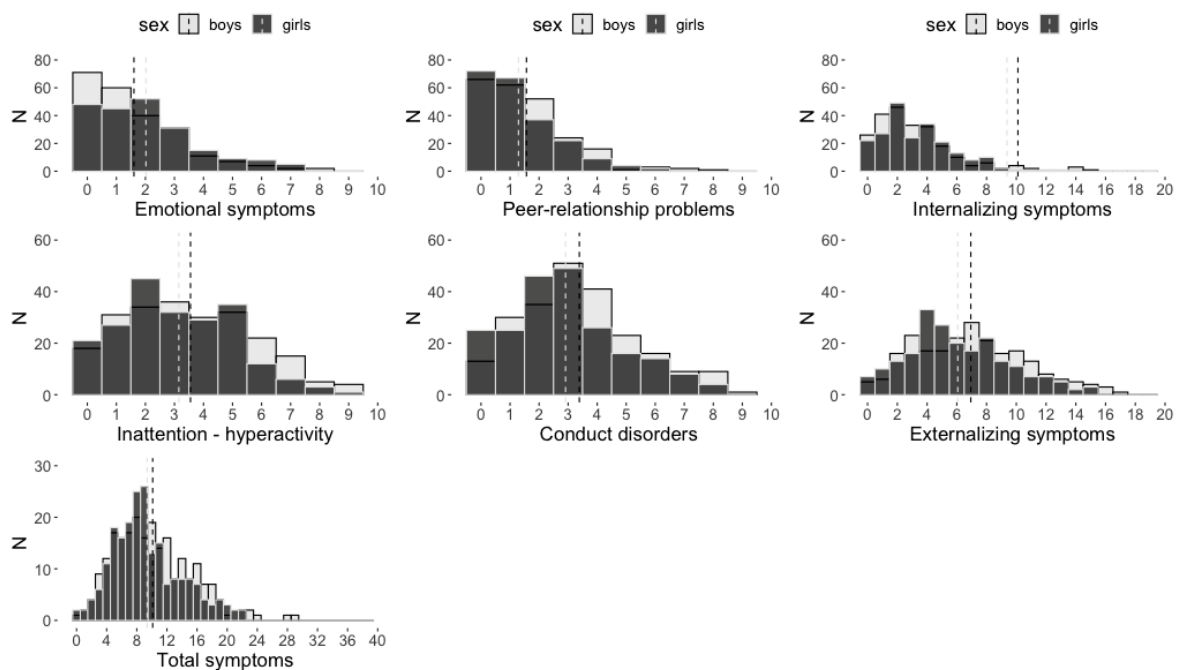

**Supplementary Figure S1.** Strengths and Difficulties Questionnaire (SDQ)'s subscales distributions (n = 441); Dash lines correspond to average values of each SDQ subscale for girls and boys.

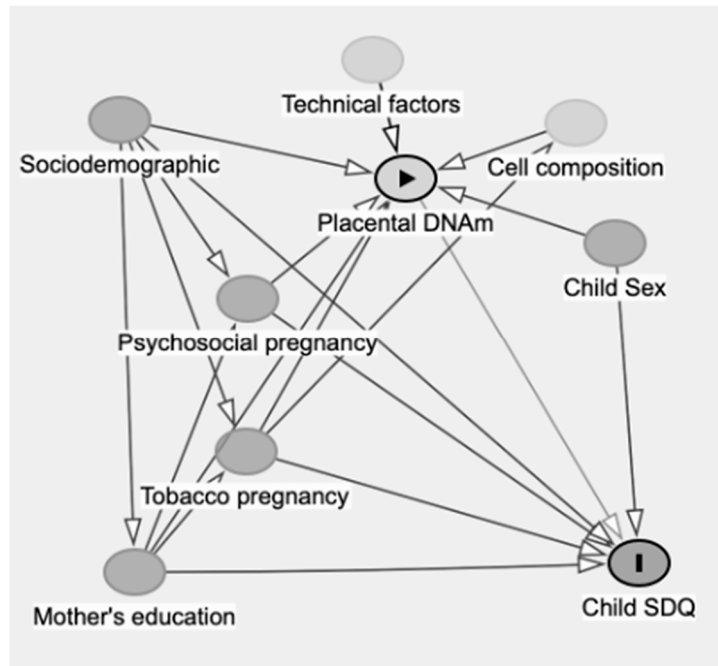

**Supplementary Figure S2.** Directed Acyclic Graph (DAG) for the selection of the covariates in the multivariate analyses between placental DNA methylation and child SDQ at 3 years of age; DNAm = DNA methylation; SDQ = Strengths and Difficulties Questionnaire (at 3 years of age); Sociodemographic factors include mother's age at conception, parity and mother's ethnicity; psychosocial factors during pregnancy include depressive symptoms and adverse events during pregnancy and technical factors include batch, plate and chip.
