# Supplementary material for: Epigenome-Wide Associations of Placental DNA Methylation and Behavioral and Emotional Difficulties in Children at 3 Years of Age
Source: Int J Mol Sci. 2023 Jul 21;24(14):11772. doi: 10.3390/ijms241411772 (PMC10380531; doi:10.3390/ijms241411772)
Supplement: Supplementary file 1 [file ijms-24-11772-s001.zip › Supplementary Tables S1-S16.xlsx]

## Sheet: SuppTableS1
Supplementary Table S1 - Hypothesis-driven analysis 1 - HPA/Serotonin pathways, n = 53 genes, 736 CpGs
b = beta of the association between CpG name and the SDQ subscale
p = p-value; p_fdr = p-value corrected using FDR procedure for multiple tests
Gene = Target gene name(s), from the UCSC database
Total SDQ						Hyperactivity/inattention						Conduct problems						Externalizating symptoms						Emotional symptoms						Peer-relationships problems						internalizing symptoms
CpG_name	n_obs	b	p	p_fdr	Gene	CpG_name	n_obs	b	p	p_fdr	Gene	CpG_name	n_obs	b	p	p_fdr	Gene	CpG_name	n_obs	b	p	p_fdr	Gene	CpG_name	n_obs	b	p	p_fdr	Gene	CpG_name	n_obs	b	p	p_fdr	Gene	CpG_name	n_obs	b	p	p_fdr	Gene
cg04132288	441	1.27066597256237	0.00234168246825217	0.958332282526616	DHRS9	cg15919431	441	7.97875540062109	0.000455767844235456	0.335445133357296	HTRA1	cg04132288	441	1.98140980030886	0.000238135500553302	0.17526772840723	DHRS9	cg07501070	441	1.72062336008722	0.00134025865124359	0.775902540995904	DRD1	cg22601917	441	4.19467946591751	0.000646715820499863	0.224492115270791	HSD11B2	cg13025668	441	-6.10927841769163	0.010008934661792	0.96942796809055	DDC	cg13527387	441	1.3848271350982	0.00218367547093337	0.736409902302288	CRHR2
cg19839507	441	-1.31685355329967	0.00335732719591477	0.958332282526616	TPH2	cg24482024	441	2.82711286520752	0.00175090225493583	0.644332029816385	CRHR1	cg07501070	441	2.04768271123746	0.000857507778682988	0.285082385003841	DRD1	cg04132288	441	1.41268760590523	0.0029646898836429	0.775902540995904	DHRS9	cg04735509	441	2.00405997260029	0.000841329323183523	0.224492115270791	NR3C2	cg11361387	441	-3.35034864948665	0.0114809032051627	0.96942796809055	DDC	cg22186216	441	2.41361558815759	0.00263320836675439	0.736409902302288	CYP11A1
cg22141389	441	2.74778266485628	0.00404929431600137	0.958332282526616	CYP11A1	cg11990309	441	0.805542252291922	0.00359092861545423	0.809380194922718	CYP3A4	cg19839507	441	-1.88224824954933	0.00116202059104827	0.285082385003841	TPH2	cg15919431	441	5.68486123572794	0.00316264622688548	0.775902540995904	HTRA1	cg13527387	441	1.85870082618961	0.000915049382897248	0.224492115270791	CRHR2	cg20246820	441	-8.96674648448159	0.0138026285507035	0.96942796809055	TPH2	cg21164131	441	0.916468994642288	0.00390462568526988	0.736409902302288	HTR2A
cg14774364	441	0.871090284523139	0.00607925732389663	0.958332282526616	CRH	cg23951474	441	1.60489529409863	0.00439880540718869	0.809380194922718	CRHR1	cg04493143	441	1.27965665382562	0.00445536984370226	0.681945538376906	HTR3C	cg19839507	441	-1.41304109916483	0.00588289685848389	0.895536963508417	TPH2	cg00712943	441	1.47511949798942	0.00151471025088335	0.278706686162537	HTR6	cg21080473	441	-1.4589362050727	0.0142338307074332	0.96942796809055	HTR2A	cg04735509	441	1.35792349097554	0.00507319594016155	0.736409902302288	NR3C2
cg09025327	441	2.27059980272839	0.00796892639990739	0.958332282526616	FKBP5	cg09025327	441	3.27479712730609	0.00599466892068287	0.824580674016624	FKBP5	cg06846259	441	-0.909577702531717	0.0046327821900605	0.681945538376906	NR3C1	cg14774364	441	0.96069411485257	0.00706315014077819	0.895536963508417	CRH	cg23085912	441	1.65106973565111	0.00233579323611675	0.310703460836443	HSD11B2	cg00025823	441	-1.67944483126022	0.0142884249683421	0.96942796809055	H6PD	cg00712943	441	1.03779309687197	0.00550946398871336	0.736409902302288	HTR6
cg00852398	441	1.12192359226419	0.00842245535487235	0.958332282526616	HTR6	cg05437692	441	2.08331905156764	0.00672212505991813	0.824580674016624	NR3C2	cg14803762	441	2.19697762762317	0.00628809770668369	0.771339985353199	CRH	cg08852963	441	1.73019054375061	0.00730057307207949	0.895536963508417	NR3C1	cg22186216	441	2.9467117042761	0.00294102272261528	0.310703460836443	CYP11A1	cg25446361	441	-1.99564941163235	0.0153545752640461	0.96942796809055	CRHR1	cg18660363	441	0.864183584681709	0.00600334159485561	0.736409902302288	TH
cg14357535	441	1.73991961232221	0.0129023013040259	0.958332282526616	CYP11B1	cg08852963	441	1.88197759338822	0.0116264180715465	0.904754337272551	NR3C1	cg07485685	441	9.78713835150663	0.00873473478331344	0.91839497150267	SRD5A1	cg22141389	441	2.84057541276231	0.009132285777675	0.926744553158493	CYP11A1	cg21661983	441	2.93518195036961	0.00295506008947704	0.310703460836443	SERPINA6	cg15926585	441	-1.84159382850911	0.0161306353267391	0.96942796809055	CYP17A1	cg14803762	441	-2.186668983566	0.00730968301465841	0.747192160086757	CRH
cg05437692	441	1.37414766618222	0.0137231452538395	0.958332282526616	NR3C2	cg00852398	441	1.45456798004652	0.012462980261137	0.904754337272551	HTR6	cg20807790	441	-0.746439196138758	0.0123877347182839	0.975377628699289	HTR2A	cg14235676	441	-4.43714675482737	0.0131706690595065	0.926744553158493	CRH	cg05426956	441	3.80199846218235	0.00347374668851203	0.319584695343107	NR3C2	cg21671386	441	3.88809445605212	0.0170523630636359	0.96942796809055	SERPINA6	cg21661983	441	2.05655582662604	0.00888713356548043	0.747192160086757	SERPINA6
cg06285340	441	0.92827594441688	0.0142170360561908	0.958332282526616	NR3C2	cg02250787	441	1.60442712096654	0.0127687051701593	0.904754337272551	POMC	cg19715936	441	-4.00496439760562	0.0144452119931492	0.975377628699289	TH	cg15835825	441	-2.37819638038549	0.0152706828854707	0.926744553158493	HTRA1	cg02250787	441	-2.73669095388399	0.0039623187512013	0.324029622320462	POMC	cg02965092	441	1.59236528754829	0.017979785867331	0.96942796809055	POMC	cg08915438	441	3.43650454953941	0.0101810992209584	0.747192160086757	HTR4
cg07501070	441	1.12645605978148	0.0168964603679414	0.958332282526616	DRD1	cg14774364	441	1.0331104871834	0.0143749119070562	0.904754337272551	CRH	cg04042861	441	-1.4160667684999	0.015466023252066	0.975377628699289	POMC	cg24482024	441	1.80944892585211	0.0156330743249903	0.926744553158493	CRHR1	cg12516059	441	0.769793826224675	0.0055610605298786	0.35623250090813	HTR5A	cg04967039	441	1.45519066605538	0.018667336904095	0.96942796809055	NR3C2	cg20246820	441	-7.7032697909244	0.01145511394361	0.747192160086757	TPH2
cg24482024	441	1.53935486833381	0.0187786289809174	0.958332282526616	CRHR1	cg11765362	441	-0.597805704575743	0.0159564399267343	0.904754337272551	AKR1D1	cg02757179	441	-1.03760216435195	0.0158478019265599	0.975377628699289	POMC	cg26720913	441	2.13874330226892	0.0202492996544769	0.926744553158493	COMT	cg18660363	441	1.06438362174363	0.00572101120427786	0.35623250090813	TH	cg20981893	441	-5.01260941644137	0.018759944822247	0.96942796809055	HTR2A	cg12516059	441	0.573377149235556	0.0115203277515348	0.747192160086757	HTR5A
cg00712943	441	0.558726772706493	0.0189703468915323	0.958332282526616	HTR6	cg07843056	441	8.25803940348709	0.0176093859068713	0.904754337272551	SRD5A1	cg20697172	441	1.0208059452797	0.0159028961200971	0.975377628699289	TPH2	cg05437692	441	1.42394226529246	0.0259252598481665	0.926744553158493	NR3C2	cg25276126	441	1.76647881223827	0.00637980550580337	0.35623250090813	SLC6A4	cg08948964	441	-1.55386554194573	0.0275267669917724	0.96942796809055	FKBP5	cg23085912	441	1.13449392641144	0.0125582896661913	0.747192160086757	HSD11B2
cg09297468	441	0.55324336852424	0.0196132853735456	0.958332282526616	HTR1E	cg16302441	441	1.14365055819784	0.0184189531377394	0.904754337272551	HTR7	cg19500607	441	0.996967023323594	0.0173132795971616	0.980197983346995	TH	cg11990309	441	0.519116655923734	0.0260553611418879	0.926744553158493	CYP3A4	cg20813374	441	2.91030435487632	0.00728417569987795	0.35623250090813	HTR2A	cg16830379	441	-2.02681984151463	0.0287110529653488	0.96942796809055	HTRA1	cg17036562	441	0.811484571656234	0.0142967885494945	0.747192160086757	HTR7
cg00130530	441	1.41710371525176	0.0211753829845985	0.958332282526616	H6PD	cg11514288	441	1.88354800838654	0.0185534436862952	0.904754337272551	DDC	cg21577406	441	-1.7474408771936	0.021762453757177	0.993106697966735	SERPINA6	cg25011257	441	1.47587253825054	0.0267954142921703	0.926744553158493	SLC6A4	cg14754494	441	2.54979845021599	0.00739707867752675	0.35623250090813	CYP11B1	cg06285340	441	1.67015327449019	0.0297079682713212	0.96942796809055	NR3C2	cg04967039	441	1.15464283810741	0.0148633573054975	0.747192160086757	NR3C2
cg14642437	441	-2.44694997661636	0.0218367170097052	0.958332282526616	CRH	cg15835825	441	-2.76319683139123	0.0195852075661316	0.904754337272551	HTRA1	cg03056854	441	1.2383810055906	0.0228550925441745	0.993106697966735	HTR2B	cg12825070	441	0.393249327555308	0.0273493139768161	0.926744553158493	CRHR2	cg08030082	441	2.45753524138621	0.00782824449259869	0.35623250090813	PROP1	cg14803762	441	-2.27965320896629	0.0304616040846091	0.96942796809055	CRH	cg09208611	441	0.883225191360211	0.0152281010887247	0.747192160086757	FKBP5
cg08852963	441	1.31846922247597	0.0222508798387532	0.958332282526616	NR3C1	cg16188532	441	2.13113465054746	0.0197532747041293	0.904754337272551	HTRA1	cg01581781	441	-0.826346428677253	0.0229608939265072	0.993106697966735	TBX19	cg07833420	441	1.08130472107243	0.0309293847435841	0.926744553158493	DRD1	cg23169111	441	3.30786579107618	0.00855249561986687	0.35623250090813	CRHR1	cg17790333	441	2.21066841124832	0.0332332360913806	0.96942796809055	HTR3B	cg00130530	441	2.25831027229461	0.0204445461004455	0.908156702682962	H6PD
cg22129276	441	1.00115630328941	0.0238669981245649	0.958332282526616	CYP11A1	cg26720913	441	2.4367425846884	0.0216981341001514	0.904754337272551	COMT	cg06285340	441	1.11615903741209	0.0247131818687635	0.993106697966735	NR3C2	cg09025327	441	2.1144058211181	0.0312641969539257	0.926744553158493	FKBP5	cg11514288	441	-3.0759691875159	0.00857968528829416	0.35623250090813	DDC	cg14642437	441	-4.54855263632139	0.0343209983976435	0.96942796809055	CRH	cg05426956	441	2.42889983055202	0.0215992361420949	0.908156702682962	NR3C2
cg16112129	441	0.724577653112609	0.0246991305824684	0.958332282526616	HTR7	cg02661802	441	-9.9914953810512	0.02456654342013	0.904754337272551	DHRS9	cg22141389	441	2.76236440292186	0.0306631077117675	0.993106697966735	CYP11A1	cg00852398	441	1.04671327052202	0.0321331214948016	0.926744553158493	HTR6	cg21164131	441	1.02234933632054	0.00871220790264447	0.35623250090813	HTR2A	cg21256649	441	-6.53379339074273	0.0346760460039736	0.96942796809055	HTR2A	cg06285340	441	1.35686538051265	0.0224260505355223	0.908156702682962	NR3C2
cg08030082	441	1.07487596619542	0.0259852188548176	0.958332282526616	PROP1	cg07833420	441	1.32047379364312	0.0249376603679775	0.904754337272551	DRD1	cg00025823	441	0.924845025129178	0.0315448823132459	0.993106697966735	H6PD	cg07760722	441	-2.28510845383859	0.0321472637467929	0.926744553158493	HTR4	cg00130530	441	3.13228646062735	0.00946897543400565	0.366798206285693	H6PD	cg10741760	441	-0.97332268375936	0.0348033042172727	0.96942796809055	LEP	cg10207656	441	2.75623385113224	0.0252649387210838	0.908156702682962	FKBP5
cg02734600	441	-1.70829966153559	0.0274763716524688	0.958332282526616	POMC	cg22141389	441	2.84174074907556	0.0270520035980739	0.904754337272551	CYP11A1	cg14774364	441	0.87200263451976	0.0360340696608417	0.993106697966735	CRH	cg12083122	441	-2.8882888588102	0.0347709181769145	0.926744553158493	HTR5A	cg21080473	441	1.43120424448551	0.0102305839146809	0.376485488060255	HTR2A	cg20647137	441	1.37628250939493	0.0372115529111574	0.96942796809055	TPH2	cg02965092	441	1.1479112194799	0.0257987456766118	0.908156702682962	POMC
cg04735509	441	0.670043413562906	0.0297649139395435	0.958332282526616	NR3C2	cg05961700	441	-1.06481939653851	0.0278468197321664	0.904754337272551	HTRA3	cg04422019	441	-1.78948425865459	0.0376172196524701	0.993106697966735	DRD3	cg20697172	441	0.769439356819518	0.0370888451370641	0.926744553158493	TPH2	cg22391185	441	7.88371392216112	0.0120291166394999	0.421591897460566	CYP11A1	cg09025327	441	3.54014839555376	0.0410037086687181	0.96942796809055	FKBP5	cg22601917	441	2.23131534793941	0.0279266489060895	0.908156702682962	HSD11B2
cg21577406	441	-1.23043696676881	0.0343628291660866	0.958332282526616	SERPINA6	cg07501070	441	1.41514730883473	0.0281945380747452	0.904754337272551	DRD1	cg14235676	441	-4.27247303738438	0.0385146805136182	0.993106697966735	CRH	cg09297468	441	0.555434629983548	0.0381616860937189	0.926744553158493	HTR1E	cg08915438	441	4.08831266413423	0.0160455733528521	0.523927004765295	HTR4	cg18773997	441	-1.8466300640591	0.0415084281067016	0.96942796809055	DRD2	cg13645651	441	0.875212605489701	0.0281287021981835	0.908156702682962	CRHR2
cg20007462	441	4.3823025042224	0.0353342668608378	0.958332282526616	AVPR1A	cg12083122	441	-3.54695527499686	0.0282735730397672	0.904754337272551	HTR5A	cg12825070	441	0.421307115466475	0.0390393889015214	0.993106697966735	CRHR2	cg21577406	441	-1.36919200734681	0.0385739423289557	0.926744553158493	SERPINA6	cg09208611	441	1.07689682493499	0.0163727188989155	0.523927004765295	FKBP5	cg23601416	441	-2.519886151658	0.0419801536298656	0.96942796809055	CRHR1	cg23169111	441	2.2335617943205	0.0283798969588426	0.908156702682962	CRHR1
cg10590842	441	1.15414881977029	0.0374304505029463	0.958332282526616	HTR1E	cg01975877	441	5.59890258267306	0.0328090643839688	0.921623054843259	H6PD	cg09191750	441	2.70156394581261	0.0394691650177424	0.993106697966735	FKBP5	cg02928916	441	0.989750824823962	0.0417516587984699	0.926744553158493	POMC	cg10323433	441	-1.38294418086764	0.0187537456190634	0.567816310172472	FKBP5	cg23851685	441	-1.48735060167524	0.0428893410703117	0.96942796809055	PRKAR1A	cg14855334	441	-10.8301238607271	0.0342100432663391	0.916984843585253	HTR7
cg14235676	441	-3.2594614315669	0.0375232512506334	0.958332282526616	CRH	cg14235676	441	-4.53328912158031	0.033556419132861	0.921623054843259	CRH	cg27579609	441	3.5282400416136	0.0411181749535546	0.993106697966735	COMT	cg14357535	441	1.61793797843381	0.0419421727421391	0.926744553158493	CYP11B1	cg25017777	441	5.57661207179529	0.0198584909487823	0.567816310172472	ACE	cg00701951	441	2.46480424469756	0.0445396418741161	0.96942796809055	HSD11B1	cg22701672	441	4.22753857197277	0.0365188504847742	0.916984843585253	HSD11B2
cg20647137	441	0.660858619732456	0.0381512389519091	0.958332282526616	TPH2	cg04087608	441	1.82241061113138	0.0339895129882252	0.921623054843259	POMC	cg18640030	441	0.566947206363624	0.0414663248866884	0.993106697966735	HTR3B	cg04493143	441	0.905528919691276	0.0423327470169076	0.926744553158493	HTR3C	cg11438011	441	0.816348568237603	0.0200587283484841	0.567816310172472	CRHR2	cg08447739	441	-2.09741009638332	0.0463048921231419	0.96942796809055	HTR4	cg06828613	441	-1.08999692286576	0.0411683177038071	0.916984843585253	NR3C1
cg23085912	441	0.602640734500891	0.0385350683847039	0.958332282526616	HSD11B2	cg25284492	441	-4.98197131758308	0.0374435809654377	0.921623054843259	CRHR1	cg18019515	441	11.1624238166756	0.042157715145548	0.993106697966735	TPH1	cg14284211	441	1.90931815761521	0.0434437113992446	0.926744553158493	CRH	cg02236913	441	1.03561167641179	0.0223050989082472	0.591189196193198	POMC	cg26532621	441	1.87951910501236	0.0488110097667224	0.96942796809055	AVP	cg02250787	441	-1.55325118603427	0.0432707541104184	0.916984843585253	POMC
cg09208611	441	0.477923026132617	0.0393405312468336	0.958332282526616	FKBP5	cg09297468	441	0.654125068127666	0.0395010404876565	0.921623054843259	HTR1E	cg22129276	441	1.1702554435191	0.0426652286701178	0.993106697966735	CYP11A1	cg21191514	441	0.522349630484504	0.0442038285272468	0.926744553158493	HTR2A	cg04607131	441	1.82112096048556	0.0231133627448037	0.591189196193198	NR3C2	cg05723130	441	-8.88980953231324	0.0512667055635977	0.96942796809055	HTRA3	cg00666422	441	0.623788429357039	0.0435067821349208	0.916984843585253	HTR6
cg11990309	441	0.421318730319768	0.0406397936790655	0.958332282526616	CYP3A4	cg18529845	441	-0.339005218919526	0.0429163639133728	0.921623054843259	TH	cg18785742	441	-3.41221063700001	0.0459173345959745	0.993106697966735	DRD2	cg11514288	441	1.34172167818696	0.0446588704446452	0.926744553158493	DDC	cg00666422	441	0.865781673125351	0.0240179956366942	0.591189196193198	HTR6	cg09366519	441	1.46276187386168	0.0516832460797605	0.96942796809055	FKBP5	cg09025327	441	2.68848191156789	0.0454256112332314	0.916984843585253	FKBP5
cg15835825	441	-1.72775755602829	0.0414689586325459	0.958332282526616	HTRA1	cg02579332	441	0.586500639416	0.0442191059572898	0.921623054843259	SRD5A2	cg21796427	441	2.66471246546979	0.0462223818161815	0.993106697966735	CYP11A1	cg24057680	441	6.65258823831059	0.0491826273383348	0.926744553158493	ACE	cg18007806	441	1.29736909884381	0.0247123103875838	0.591189196193198	HTR3A	cg23757489	441	1.26625026601346	0.0517515653949102	0.96942796809055	ACE	cg11438011	441	0.566269560292375	0.0461286866068921	0.916984843585253	CRHR2
cg16302441	441	0.711211404925646	0.0469942090455011	0.958332282526616	HTR7	cg17875135	441	3.31341113252593	0.0442224927935761	0.921623054843259	HTR3A	cg08852963	441	1.50671864609102	0.0512378262188595	0.993106697966735	NR3C1	cg22129276	441	0.982891087429806	0.0510435097697744	0.926744553158493	CYP11A1	cg10207656	441	3.45223166905687	0.0249006319048766	0.591189196193198	FKBP5	cg24425171	441	-4.11786693304885	0.051917411616956	0.96942796809055	CRHR1	cg02501334	441	-7.0751854652111	0.0476651987193098	0.916984843585253	POMC
cg26720913	441	1.63931137952323	0.0474204038512138	0.958332282526616	COMT	cg25736198	441	2.8577288882571	0.0450381024816283	0.921623054843259	MC2R	cg11731737	441	4.92784963753391	0.0517687036048565	0.993106697966735	CRHR2	cg25284492	441	-3.90666755134166	0.0511714155455207	0.926744553158493	CRHR1	cg22701672	441	5.57469485191503	0.0264517492474845	0.600690150674843	HSD11B2	cg11712482	441	-2.5197454465211	0.0529542489659525	0.96942796809055	HTR5A	cg22141389	441	3.07705795488943	0.0524518940399645	0.916984843585253	CYP11A1
cg04278702	441	0.703377763291001	0.049210171342173	0.958332282526616	POU1F1	cg08030082	441	1.32026239582263	0.0453376968749745	0.921623054843259	PROP1	cg16112129	441	0.809230489669557	0.0538479282035812	0.993106697966735	HTR7	cg04278702	441	0.778530645726768	0.0531798601202594	0.926744553158493	POU1F1	cg03024742	441	1.01620237587867	0.0272126550030218	0.600690150674843	SRD5A2	cg21164131	441	0.798443725820754	0.0547160838769207	0.96942796809055	HTR2A	cg08447739	441	-1.59319679344873	0.0528589602532911	0.916984843585253	HTR4
cg10588377	441	0.746413110013036	0.0507906769867327	0.958332282526616	HTR1E	cg01732037	441	1.06315502582375	0.0457101901430089	0.921623054843259	H6PD	cg13069918	441	1.22880826914087	0.0562064955707198	0.993106697966735	DDC	cg09863441	441	1.95353454768814	0.0557157727975512	0.926744553158493	FKBP5	cg17036562	441	0.903301835879836	0.0277492732648705	0.600690150674843	HTR7	cg05506829	441	5.4891195731819	0.0560151611464342	0.96942796809055	HTRA3	cg15189567	441	2.33395884872298	0.0578270780196219	0.916984843585253	HTRA1
cg19500607	441	0.631130542845033	0.0510184719690777	0.958332282526616	TH	cg14199144	441	0.974969485311145	0.0476172539636847	0.921623054843259	DDC	cg25011257	441	1.45285437935925	0.0581311959070371	0.993106697966735	SLC6A4	cg09191750	441	2.17669823686253	0.0565297323436287	0.926744553158493	FKBP5	cg10906284	441	0.912538818422262	0.0357133443021901	0.718786425191463	CRHR2	cg06846259	441	-0.962092121384336	0.0561880708081947	0.96942796809055	NR3C1	cg11514288	441	-1.7828397460002	0.0580643594690657	0.916984843585253	DDC
cg15919431	441	3.36092482504105	0.0511740855167052	0.958332282526616	HTRA1	cg08215831	441	0.722377187620306	0.0481175821460188	0.921623054843259	NR3C1	cg27551605	441	0.895726533774161	0.0582158436571373	0.993106697966735	COMT	cg07843056	441	5.51548918199323	0.0578461940205896	0.926744553158493	SRD5A1	cg14803762	441	-2.07274630083714	0.0363610376362077	0.718786425191463	CRH	cg23035419	441	3.48869879622478	0.0563165393651399	0.96942796809055	HSD11B2	cg25017777	441	3.66450079636602	0.0609229729648299	0.916984843585253	ACE
cg12825070	441	0.304002169813107	0.0518200181536965	0.958332282526616	CRHR2	cg03565659	441	2.5205521623391	0.053746773965263	0.921623054843259	SRD5A2	cg08730070	441	-3.08979715465068	0.0608828116705942	0.993106697966735	SRD5A1	cg08215831	441	0.578792590819085	0.0583053505469995	0.926744553158493	NR3C1	cg23720528	441	-1.12546445605154	0.0398444719630997	0.718786425191463	SLC6A4	cg21773872	441	1.69076772698528	0.060278513922126	0.96942796809055	CYP11A1	cg17860381	441	-9.80540933818534	0.0645013631775853	0.916984843585253	HTR3B
cg17790333	441	0.967928289550689	0.0525293425905267	0.958332282526616	HTR3B	cg01845356	441	1.03952260960517	0.053973255250559	0.921623054843259	H6PD	cg03084214	441	-0.763254523586665	0.0622925735127451	0.993106697966735	POMC	cg10135483	441	0.559250064267997	0.0588588517452776	0.926744553158493	HTR1E	cg03667083	441	1.63413122295512	0.040626247948404	0.718786425191463	DHRS9	cg03857453	441	-9.65482912364366	0.0642495056146181	0.96942796809055	POMC	cg10590842	441	1.61896584818036	0.0654881276604145	0.916984843585253	HTR1E
cg14284211	441	1.59687939129181	0.054562391340826	0.958332282526616	CRH	cg21191514	441	0.594635983477359	0.0546278129210118	0.921623054843259	HTR2A	cg20629239	441	2.86170430854098	0.0624065690617451	0.993106697966735	TPH2	cg04471890	441	-3.22829507516344	0.0588763156987688	0.926744553158493	DRD3	cg04732193	441	-1.81882750588258	0.0413318978068322	0.718786425191463	HTRA3	cg25730237	441	4.06870252339272	0.0648025101238122	0.96942796809055	MC4R	cg10906284	441	0.642528041117708	0.0659435925941186	0.916984843585253	CRHR2
cg18019515	441	8.09840007971095	0.056849654953516	0.958332282526616	TPH1	cg07760722	441	-2.45865821579092	0.0546573901575308	0.921623054843259	HTR4	cg07464571	441	-0.935305041547715	0.0627102813354285	0.993106697966735	HTR4	cg19715936	441	-2.72910703875899	0.0638317530852011	0.926744553158493	TH	cg00852398	441	1.6886217436861	0.0419142928468066	0.718786425191463	HTR6	cg27551605	441	-1.4458580202598	0.0665371052583001	0.96942796809055	COMT	cg21702128	441	0.443675568323344	0.0661419781966544	0.916984843585253	CYP11A1
cg18726036	441	-1.67705015175374	0.0569040837650285	0.958332282526616	DRD2	cg02276314	441	1.70786164028399	0.0550074132692775	0.921623054843259	DHRS9	cg24870096	441	0.844272857617069	0.0654707901725358	0.993106697966735	PRKAR1A	cg14199144	441	0.762974075421437	0.0640375407942882	0.926744553158493	DDC	cg03591753	441	2.2473653305606	0.0431171122402059	0.718786425191463	POMC	cg05912121	441	-1.14421002211626	0.0691774818822367	0.96942796809055	NR3C2	cg14357535	441	2.03827035479681	0.0670605036905454	0.916984843585253	CYP11B1
cg00358132	441	1.08118048927144	0.0573820192579015	0.958332282526616	HTR6	cg25011257	441	1.51962369158506	0.0555828130061722	0.921623054843259	SLC6A4	cg12782180	441	-0.827440912322562	0.0689094476456729	0.993106697966735	CRHR2	cg16302441	441	0.751945873530631	0.0665503540619435	0.926744553158493	HTR7	cg02734600	441	-3.08367980842494	0.0433431475681944	0.718786425191463	POMC	cg08789908	441	8.03105152938802	0.0708207106369318	0.96942796809055	NR3C1	cg09926649	441	-2.04334203777778	0.0674759258314419	0.916984843585253	HTR1E
cg08789908	441	4.15213581354875	0.0577945671901948	0.958332282526616	NR3C1	cg09863441	441	2.30826846967966	0.0559942909653949	0.921623054843259	FKBP5	cg06417522	441	5.62310605387742	0.0705497957109152	0.993106697966735	NR3C1	cg06531741	441	0.701590792810419	0.0668587407467827	0.926744553158493	NR3C1	cg02501334	441	-8.93247373166844	0.0440348466689289	0.718786425191463	POMC	cg05939993	441	-1.54245117363301	0.0725004852868596	0.96942796809055	HTRA3	cg08948964	441	-1.00064712627464	0.0676189522450329	0.916984843585253	FKBP5
cg21191514	441	0.429747329118489	0.0592285574400557	0.958332282526616	HTR2A	cg14284211	441	2.15278124001754	0.0567411431464696	0.921623054843259	CRH	cg02928916	441	1.01014279021013	0.0707302596717311	0.993106697966735	POMC	cg27551605	441	0.758386105282928	0.0686431669392237	0.926744553158493	COMT	cg23524341	441	-7.98946921187102	0.0447428411668494	0.718786425191463	ACE	cg17736230	441	-4.97073548412929	0.0739630156572912	0.96942796809055	TH	cg11150353	441	4.77647813254957	0.0679762925055595	0.916984843585253	DDC
cg06417522	441	4.6221978238158	0.0598478552625112	0.958332282526616	NR3C1	cg18595639	441	3.87852855051024	0.0584530787490793	0.921623054843259	DRD2	cg12598837	441	2.15805326906877	0.0708647698071199	0.993106697966735	DDC	cg00358132	441	1.17239862239857	0.0707132700549455	0.926744553158493	HTR6	cg24482024	441	2.55715480346508	0.0456049199019191	0.718786425191463	CRHR1	cg22186216	441	1.81065811730477	0.0770363571525152	0.96942796809055	CYP11A1	cg03857453	441	-7.43615050812072	0.068442760523199	0.916984843585253	POMC
cg20246820	441	-3.69647141151134	0.0607499170858002	0.958332282526616	TPH2	cg27521571	441	-0.778337283604665	0.0597785787515783	0.921623054843259	COMT	cg15835825	441	-1.96111691731643	0.0779610352808157	0.993106697966735	HTRA1	cg18785742	441	-2.70068692169179	0.071167538204336	0.926744553158493	DRD2	cg17723156	441	1.78648896590196	0.0501684331859201	0.718786425191463	TH	cg04144768	441	-2.5383122116632	0.078049379860712	0.96942796809055	HTR3C	cg09553346	441	6.54261290394049	0.0684651515090953	0.916984843585253	HTR1E
cg25017777	441	2.32058755526707	0.0611978495635203	0.958332282526616	ACE	cg14357535	441	1.79375986323704	0.0599247726998172	0.921623054843259	CYP11B1	cg02937158	441	-1.03879805998769	0.0804390339600409	0.993106697966735	POMC	cg18726036	441	-1.80581784500031	0.0719968968620754	0.926744553158493	DRD2	cg23335356	441	-1.09489024270192	0.050715740534843	0.718786425191463	ACE	cg13645651	441	0.910357708147269	0.0808320184146234	0.96942796809055	CRHR2	cg08258978	441	1.25719296019149	0.0685993700437731	0.916984843585253	PROP1
cg17860381	441	-6.24193918689627	0.0645468234951267	0.981591216400232	HTR3B	cg07275757	441	0.782702018201004	0.0629340474642195	0.921623054843259	DRD1	cg14791547	441	4.20823226346538	0.0852571756353194	0.993106697966735	CYP11B1	cg14803762	441	1.2013493238321	0.0733739833722248	0.926744553158493	CRH	cg13069918	441	1.84983571757031	0.0508174729044484	0.718786425191463	DDC	cg23881278	441	-8.34037304758884	0.0810248224079906	0.96942796809055	PRKAR1A	cg21671386	441	2.25960960200678	0.0696963442142979	0.916984843585253	SERPINA6
cg07833420	441	0.829758083545249	0.0660050953455533	0.981591216400232	DRD1	cg15600279	441	-0.868295913361698	0.0634257630086055	0.921623054843259	HTRA1	cg26464934	441	-0.81771398552252	0.0856108664697986	0.993106697966735	AVP	cg06846259	441	-0.506944814286979	0.074329905292516	0.926744553158493	NR3C1	cg24118521	441	-2.10109789224575	0.0510545319958311	0.718786425191463	CRHR1	cg19500607	441	1.13575316640866	0.0815178869948583	0.96942796809055	TH	cg14642437	441	-3.10051729824555	0.0700103040187936	0.916984843585253	CRH
cg07760722	441	-1.73080514937434	0.0685791896279302	0.981591216400232	HTR4	cg11361387	441	1.65234009708222	0.0643815905414276	0.921623054843259	DDC	cg10777103	441	4.42667614760563	0.0859039544160415	0.993106697966735	HTR5A	cg01443318	441	1.04595947950252	0.0754493185873132	0.926744553158493	H6PD	cg21702128	441	0.569897262280489	0.0523869368370017	0.718786425191463	CYP11A1	cg26724798	441	0.869767745870959	0.0823010421512767	0.96942796809055	COMT	cg23524341	441	-5.56528863431634	0.0703070595702262	0.916984843585253	ACE
cg21713424	441	5.39597796043782	0.0685806324293186	0.981591216400232	CYP11A1	cg23601416	441	1.52190750011488	0.0651945518885216	0.921623054843259	CRHR1	cg07425204	441	-1.28218538893855	0.0906362624840504	0.993106697966735	HTR4	cg06417522	441	4.84366467253192	0.0807406041971431	0.926744553158493	NR3C1	cg25446361	441	1.47278926843435	0.0526489282851818	0.718786425191463	CRHR1	cg04132288	441	1.44826369468398	0.08793699218095	0.96942796809055	DHRS9	cg13025668	441	-3.1466732037752	0.0721618256581093	0.916984843585253	DDC
cg01443318	441	0.935200200019159	0.0698208596479853	0.981591216400232	H6PD	cg24433738	441	2.45958618283341	0.0661453727766217	0.921623054843259	CRHR1	cg14065127	441	0.923880337655862	0.0906980912095782	0.993106697966735	LEP	cg14642437	441	-2.11367401394484	0.0833952977826574	0.926744553158493	CRH	cg06828613	441	-1.27060401921831	0.0530859988967735	0.718786425191463	NR3C1	cg17036562	441	0.731042857910298	0.0884518751229617	0.96942796809055	HTR7	cg18007806	441	0.847817808234036	0.0727163467641578	0.916984843585253	HTR3A
cg10207656	441	1.40033444900859	0.0741676744074481	0.981591216400232	FKBP5	cg06531741	441	0.831925459064051	0.0677541962891433	0.921623054843259	NR3C1	cg04471890	441	-3.28506945254858	0.0925986289338521	0.993106697966735	DRD3	cg01845356	441	0.780235690994795	0.0837845301071714	0.926744553158493	H6PD	cg20073007	441	2.79819068384008	0.0543957485608493	0.718786425191463	TPH2	cg07579946	441	-2.42613147225329	0.0894496893378677	0.96942796809055	NR3C1	cg01145353	441	-2.48776304959238	0.0745757983641593	0.916984843585253	TBX19
cg02928916	441	0.779463397352904	0.0741848476701089	0.981591216400232	POMC	cg27345592	441	-1.78144565098992	0.0679363092212033	0.921623054843259	COMT	cg13000004	441	-1.44307772620358	0.0926894038960662	0.993106697966735	DDC	cg17524078	441	0.486199250165076	0.0839602309782044	0.926744553158493	HTR3A	cg16302441	441	1.29709558746797	0.0592545364312403	0.718786425191463	HTR7	cg22812013	441	-2.40821542946131	0.0909900308855212	0.96942796809055	HSD11B2	cg00852398	441	1.21094866464794	0.0757988261176582	0.916984843585253	HTR6
cg25103337	441	0.860449722470575	0.075255389668365	0.981591216400232	ACE	cg24934431	441	-1.63675305017297	0.0715547577040361	0.921623054843259	ACE	cg20647137	441	0.697535948866447	0.0948075842440904	0.993106697966735	TPH2	cg21796427	441	1.99964347799763	0.0864570681915551	0.926744553158493	CYP11A1	cg12825070	441	0.572078033462996	0.0600652590248328	0.718786425191463	CRHR2	cg15912040	441	-4.03148847181287	0.0929374653414673	0.96942796809055	HTRA1	cg02916102	441	-4.87027475386065	0.0818227522794891	0.916984843585253	SRD5A2
cg06836480	441	0.852920871320835	0.0753463935875407	0.981591216400232	NR3C1	cg00358132	441	1.38576654251428	0.073052790717675	0.921623054843259	HTR6	cg14642437	441	-2.33745901092684	0.0962791262411053	0.993106697966735	CRH	cg13000004	441	-1.2731272303787	0.0873657371111364	0.926744553158493	DDC	cg03974204	441	3.12136123361305	0.0611606560632825	0.718786425191463	SRD5A2	cg22141389	441	3.35137258228084	0.0931712067777821	0.96942796809055	CYP11A1	cg20647137	441	0.864960085348069	0.0827533869325167	0.916984843585253	TPH2
cg06846259	441	-0.439297083990333	0.0785652940460015	0.981591216400232	NR3C1	cg15403517	441	-0.30129077789811	0.0740881984431051	0.921623054843259	HTRA1	cg08789908	441	4.70211495516079	0.0964358772657917	0.993106697966735	NR3C1	cg23753947	441	-1.70531940305289	0.0874299399051157	0.926744553158493	SLC6A4	cg18603538	441	1.79602030833249	0.0616654467482016	0.718786425191463	HTR3B	cg14065127	441	-2.18628669932384	0.100622930139599	0.96942796809055	LEP	cg23757489	441	0.871722179562022	0.0831286387162816	0.916984843585253	ACE
cg23169111	441	1.13009640226993	0.0792057594347139	0.981591216400232	CRHR1	cg13131263	441	6.85411654510182	0.0754649171366089	0.921623054843259	DDC	cg10135483	441	0.564432350741219	0.0965891312282113	0.993106697966735	HTR1E	cg15600279	441	-0.66441875784685	0.0888749817964269	0.926744553158493	HTRA1	cg21713424	441	10.7900682611856	0.0617748835688538	0.718786425191463	CYP11A1	cg19837528	441	-1.82094590644883	0.101994670965603	0.96942796809055	AVPR1A	cg16112129	441	0.883838609835232	0.0833997141886364	0.916984843585253	HTR7
cg22186216	441	0.87810895639946	0.0822268236605717	0.981591216400232	CYP11A1	cg18847882	441	2.54593667145617	0.0754850223465239	0.921623054843259	DRD2	cg04278702	441	0.768275815314058	0.0989291897245968	0.993106697966735	POU1F1	cg20007462	441	4.00198719700479	0.0907202166641234	0.926744553158493	AVPR1A	cg25736198	441	3.68507693424312	0.0625710108667715	0.718786425191463	MC2R	cg17860381	441	-11.1052052446421	0.107970025151956	0.96942796809055	HTR3B	cg20813374	441	1.51389952172498	0.0843694483347255	0.916984843585253	HTR2A
cg06828613	441	-0.589760537756059	0.0824385854213545	0.981591216400232	NR3C1	cg05136169	441	3.31006707134617	0.0765618575552094	0.921623054843259	HTRA3	cg22827011	441	0.463081934646092	0.100035694880425	0.993106697966735	HSD11B2	cg27579609	441	2.53036456124557	0.0909715189136823	0.926744553158493	COMT	cg20246820	441	-6.83856199841986	0.0645059014609673	0.718786425191463	TPH2	cg05624376	441	1.69682591822374	0.108308159893445	0.96942796809055	NR3C2	cg22129276	441	1.19543075869989	0.0869108636598347	0.916984843585253	CYP11A1
cg21657705	441	-0.726430861995587	0.083534964125767	0.981591216400232	SERPINA6	cg01614101	441	-0.573035797409944	0.0805035388173879	0.921623054843259	H6PD	cg18845001	441	-0.496861572960084	0.102011281522059	0.993106697966735	HTR3A	cg18847882	441	2.0174788550628	0.0914438434935644	0.926744553158493	DRD2	cg14855334	441	-11.7288132744211	0.0650166969443838	0.718786425191463	HTR7	cg09926649	441	-2.29837333928048	0.109856750682307	0.96942796809055	HTR1E	cg20592995	441	-3.18050030855766	0.0875823417928725	0.916984843585253	AVPR1A
cg17085721	441	-3.98586092803066	0.0837640756018593	0.981591216400232	HTRA1	cg18948125	441	-0.456359415078716	0.0823122844975671	0.921623054843259	TH	cg17790333	441	1.054811827641	0.104106225559359	0.993106697966735	HTR3B	cg02757179	441	-0.63962896253766	0.0936253169001535	0.926744553158493	POMC	cg24105933	441	4.48098348057934	0.066937686867837	0.718786425191463	SLC6A4	cg21657705	441	-1.36825044764835	0.109944719494833	0.96942796809055	SERPINA6	cg07863439	441	4.02114830695942	0.0889225659025318	0.916984843585253	NR3C1
cg12516059	441	0.249711478506145	0.085142865255438	0.981591216400232	HTR5A	cg12825070	441	0.370316329161961	0.0836645154726672	0.921623054843259	CRHR2	cg07648740	441	1.37944536980385	0.105232936674751	0.993106697966735	HTR4	cg18019515	441	8.055790742344	0.0943746929426029	0.926744553158493	TPH1	cg06149357	441	0.741477148585477	0.067856194834341	0.718786425191463	HTRA3	cg04856117	441	-2.48698031664716	0.110084240455481	0.96942796809055	NR3C2	cg05141787	441	-1.29558815914881	0.0909098350743048	0.916984843585253	HTRA3
cg09863441	441	1.56581039050206	0.0853557579478463	0.981591216400232	FKBP5	cg23598419	441	1.78691480773983	0.0839240413282745	0.921623054843259	ACE	cg02318454	441	0.691639751472726	0.107168585395308	0.993106697966735	POMC	cg03084214	441	-0.603794304187582	0.0950785080148327	0.926744553158493	POMC	cg14357535	441	2.49617572780295	0.0685378717582721	0.718786425191463	CYP11B1	cg01804500	441	-4.74676990125652	0.11094300781154	0.96942796809055	H6PD	cg19839507	441	-1.22224049016091	0.0909163523639441	0.916984843585253	TPH2
cg23720528	441	-0.483693115367428	0.088694311131628	0.98821050722751	SLC6A4	cg19285508	441	3.76475839319898	0.084926462035666	0.921623054843259	DRD2	cg00140191	441	-4.52549633895572	0.107456338478378	0.993106697966735	HTR6	cg18640030	441	0.404686599703247	0.095549123364723	0.926744553158493	HTR3B	cg03363743	441	1.77737395475765	0.069822923282214	0.718786425191463	SRD5A2	cg12908660	441	-1.22395211750494	0.111334088468819	0.96942796809055	HTR5A	cg08030082	441	1.2904455213079	0.0914607856197197	0.916984843585253	PROP1
cg23335356	441	-0.481421776080365	0.0915119629644324	0.98821050722751	ACE	cg02236913	441	-0.55405615708567	0.0858024726134618	0.921623054843259	POMC	cg13645651	441	0.519513988190269	0.113138912957211	0.993106697966735	CRHR2	cg02250787	441	0.899886706315072	0.097610904370213	0.926744553158493	POMC	cg09361691	441	-2.21538759079152	0.0701793174937276	0.718786425191463	HTR1E	cg08915438	441	2.74944981046319	0.111978343784202	0.96942796809055	HTR4	cg18865272	441	-3.42210202893296	0.0925553868239416	0.916984843585253	DRD2
cg13000004	441	-1.08882451774257	0.0967021283415099	0.98821050722751	DDC	cg18726036	441	-2.02245876552524	0.0858604925510688	0.921623054843259	DRD2	cg13947929	441	1.03928115213418	0.113507872156724	0.993106697966735	DDC	cg03056854	441	0.783946725641158	0.0979682227466318	0.926744553158493	HTR2B	cg04360210	441	2.09979953761194	0.0706022971099474	0.718786425191463	DRD3	cg10590842	441	1.784582644772	0.11358661077159	0.96942796809055	HTR1E	cg02734600	441	-2.07282586557319	0.0927791038261108	0.916984843585253	POMC
cg10135483	441	0.437807264350054	0.0999463899403918	0.98821050722751	HTR1E	cg19502744	441	-0.363696766565052	0.0859074643426646	0.921623054843259	DRD2	cg12715421	441	-0.89676502965588	0.11422128240867	0.993106697966735	DDC	cg17875135	441	2.25421595755973	0.0980678865512087	0.926744553158493	HTR3A	cg13645651	441	0.884487481545588	0.0710426805047397	0.718786425191463	CRHR2	cg23764129	441	-2.04735380864185	0.120044513303785	0.96942796809055	PRKAR1A	cg14325092	441	1.40471725605363	0.0927856466190756	0.916984843585253	CYP11B1
cg10300814	441	-2.15580236810909	0.108413042868729	0.98821050722751	FKBP5	cg21657705	441	-0.974637904319608	0.0882046622682009	0.921623054843259	SERPINA6	cg07760722	441	-1.93350214048851	0.115129048930557	0.993106697966735	HTR4	cg21657705	441	-0.790883199625944	0.0988353056374884	0.926744553158493	SERPINA6	cg06860277	441	2.06629119012286	0.0716474111682674	0.718786425191463	NR3C1	cg21878188	441	9.81489307754196	0.121950990757588	0.96942796809055	CYP11A1	cg05624376	441	1.37021284317522	0.0931555973448485	0.916984843585253	NR3C2
cg23757489	441	0.50136428222173	0.113177391611809	0.98821050722751	ACE	cg06841846	441	1.42910545955869	0.0885281045140446	0.921623054843259	HTR4	cg14357535	441	1.43520512227117	0.116011122364212	0.993106697966735	CYP11B1	cg16112129	441	0.607259397348506	0.0999035320266526	0.926744553158493	HTR7	cg08258978	441	1.53978633853663	0.0717974989206714	0.718786425191463	PROP1	cg19826045	441	3.85031914630736	0.122780980445284	0.96942796809055	AVPR1A	cg21713424	441	7.91877242400863	0.0934771814226027	0.916984843585253	CYP11A1
cg05961700	441	-0.570916479119927	0.114511316744718	0.98821050722751	HTRA3	cg24057680	441	6.92548901200752	0.0889065718666731	0.921623054843259	ACE	cg00840332	441	-0.43496291759327	0.118032495561585	0.993106697966735	H6PD	cg02734600	441	-1.44503786426373	0.100027876142162	0.926744553158493	POMC	cg01586609	441	1.0137185856733	0.0719745372398207	0.718786425191463	HTR6	cg17015994	441	-1.55204953663878	0.124084498204497	0.96942796809055	HTRA1	cg10323433	441	-0.806878378533033	0.0935901558953409	0.916984843585253	FKBP5
cg05723130	441	-3.60505456216388	0.114816730396578	0.98821050722751	HTRA3	cg02928916	441	0.977598943192754	0.0928728707201193	0.949367122916775	POMC	cg10686375	441	-7.0359365179683	0.118876576945503	0.993106697966735	HTR1E	cg11731737	441	3.73379725218365	0.100874243844897	0.926744553158493	CRHR2	cg13373360	441	2.69768589970189	0.0726995483420788	0.718786425191463	AKR1D1	cg09208611	441	0.733952667489294	0.124667265174349	0.96942796809055	FKBP5	cg26532621	441	1.23877445386014	0.0937237803372115	0.916984843585253	AVP
cg21286526	441	1.80529436657488	0.115695059589469	0.98821050722751	HTR2A	cg24877195	441	-4.30124647412402	0.0965378856325408	0.973313477062329	ACE	cg14059288	441	2.0681778064363	0.118968546585246	0.993106697966735	HTR5A	cg07485685	441	5.35613856039963	0.101403406690799	0.926744553158493	SRD5A1	cg03449379	441	3.24625062877155	0.074128877357275	0.718786425191463	POMC	cg02037013	441	0.708650704158463	0.125167280524548	0.96942796809055	H6PD	cg10712173	441	-7.64508631335795	0.0967462966193709	0.916984843585253	LEP
cg25284492	441	-2.73318197882825	0.120399001404221	0.98821050722751	CRHR1	cg17524078	441	0.557941380543366	0.0990004466910521	0.978516538829682	HTR3A	cg24057680	441	5.99407588628401	0.120794381792972	0.993106697966735	ACE	cg19226017	441	-0.95156537676844	0.102105001846341	0.926744553158493	HTR3A	cg00308665	441	-1.03746673507521	0.0746725043969867	0.718786425191463	H6PD	cg21796427	441	-3.05799394216169	0.125924255713975	0.96942796809055	CYP11A1	cg25276126	441	0.871773091001349	0.0978173284685415	0.916984843585253	SLC6A4
cg04493143	441	0.638808073041237	0.121770517696482	0.98821050722751	HTR3C	cg04278702	441	0.788387468343732	0.0997129625166116	0.978516538829682	POU1F1	cg13025668	441	2.14875948232408	0.121029600295897	0.993106697966735	DDC	cg03565659	441	1.83588337230727	0.103572065920902	0.926744553158493	SRD5A2	cg03560973	441	1.65681072182573	0.0761525228666042	0.718786425191463	SRD5A2	cg10901968	441	9.23211933949019	0.131141494672715	0.96942796809055	DDC	cg04607131	441	1.06846792155116	0.0981082109321723	0.916984843585253	NR3C2
cg23753947	441	-1.35115798127149	0.123737387711877	0.98821050722751	SLC6A4	cg23753947	441	-1.95654852376202	0.101785887091026	0.9791097127148	SLC6A4	cg16844661	441	1.00317964010188	0.121839902660856	0.993106697966735	HTRA1	cg10874403	441	0.545348025266426	0.104012482569205	0.926744553158493	CRHR2	cg14149680	441	0.965903037088232	0.0764272271686666	0.718786425191463	HTR5A	cg20753294	441	-2.95510997291057	0.131498620778841	0.96942796809055	HTR2A	cg19500607	441	0.836734616550666	0.0998066439025125	0.916984843585253	TH
cg01732037	441	0.59447348342882	0.124215688089727	0.98821050722751	H6PD	cg03279206	441	0.853998259955123	0.103081809918105	0.9791097127148	SRD5A2	cg18023598	441	1.95396785880819	0.123410291980473	0.993106697966735	TH	cg01975877	441	3.45211639765143	0.10440840078554	0.926744553158493	H6PD	cg21013206	441	-1.465815964364	0.0769622804908118	0.718786425191463	HTR2A	cg02276314	441	-1.94132337988945	0.13202815211909	0.96942796809055	DHRS9	cg13069918	441	1.26636847767637	0.100033136813621	0.916984843585253	DDC
cg18421538	441	0.888558670349413	0.12788536091375	0.98821050722751	TH	cg27090784	441	2.41141243010011	0.104910633675935	0.9791097127148	COMT	cg27208536	441	-0.824680997835677	0.124356949489758	0.993106697966735	COMT	cg00307530	441	-1.0738566604813	0.104745259110877	0.926744553158493	HSD3B2	cg11150353	441	5.75542436643594	0.0771033260717194	0.718786425191463	DDC	cg12758687	441	-1.14214451755458	0.132107717075334	0.96942796809055	LEP	cg09361691	441	-1.57642717880298	0.108449867082359	0.916984843585253	HTR1E
cg09191750	441	1.52939149235088	0.129979462229603	0.98821050722751	FKBP5	cg10538202	441	-0.729919746071889	0.105094656663681	0.9791097127148	HTR1E	cg26720913	441	1.70189047398138	0.125806739828283	0.993106697966735	COMT	cg09623773	441	0.561895413610315	0.108138286617384	0.926744553158493	FKBP5	cg10335743	441	-1.63179676004803	0.0780478550298567	0.718786425191463	FKBP5	cg27640254	441	1.62932524859275	0.132350887885487	0.96942796809055	COMT	cg12761518	441	-1.3654404381346	0.108712734617849	0.916984843585253	DDC
cg06943371	441	4.17028007291568	0.13006991345873	0.98821050722751	SRD5A1	cg10588377	441	0.842960838621611	0.106451057473303	0.979349728754385	HTR1E	cg11750900	441	2.95423019525197	0.125941209931965	0.993106697966735	DDC	cg12598837	441	1.67159798123297	0.109052384400975	0.926744553158493	DDC	cg00358132	441	1.95078655266362	0.0781289592599416	0.718786425191463	HTR6	cg10300814	441	-4.00515695307642	0.133836447403781	0.96942796809055	FKBP5	cg10335743	441	-1.19708459530221	0.109384301884853	0.916984843585253	FKBP5
cg07648740	441	0.9896049994579	0.130269960393649	0.98821050722751	HTR4	cg09361691	441	1.32616592755377	0.113575613428319	0.98707980895593	HTR1E	cg02716646	441	-0.582292447887336	0.126325448358854	0.993106697966735	DHRS9	cg23951474	441	0.757445241342809	0.109468052957285	0.926744553158493	CRHR1	cg13365022	441	1.45659253667764	0.079544220547239	0.722772176824295	AKR1D1	cg08791953	441	-0.843006830064811	0.13442063002401	0.96942796809055	NR3C1	cg14149680	441	0.712667791970573	0.110259925290406	0.916984843585253	HTR5A
cg18068537	441	1.02456060558875	0.131223348684761	0.98821050722751	DRD2	cg25103337	441	1.04814032507138	0.115836811947547	0.98707980895593	ACE	cg06961323	441	-0.81053380490923	0.128507105435197	0.993106697966735	PROP1	cg18232548	441	3.08187749893155	0.110263324256164	0.926744553158493	DRD2	cg15189567	441	2.65883551413622	0.08118666884563	0.728699856955899	HTRA1	cg01335087	441	-2.15636389114285	0.135653265259581	0.96942796809055	H6PD	cg21773872	441	1.14858030191449	0.110903176276927	0.916984843585253	CYP11A1
cg11438011	441	0.271551637110294	0.13150112890642	0.98821050722751	CRHR2	cg08636224	441	4.00506744880384	0.117503531450148	0.98707980895593	SRD5A1	cg01145353	441	-1.76302919959186	0.130460557858698	0.993106697966735	TBX19	cg11765362	441	-0.332592417571143	0.111096595735545	0.926744553158493	AKR1D1	cg09553346	441	7.63997513296247	0.0850634219568053	0.753815596418569	HTR1E	cg20387815	441	-4.03000747207255	0.135720512210893	0.96942796809055	AVPR1A	cg01049782	441	-1.1265748609234	0.112817137750357	0.916984843585253	HSD11B1
cg02579332	441	0.322295812146063	0.132058460330054	0.98821050722751	SRD5A2	cg18232548	441	3.58201024148815	0.119176961556295	0.98707980895593	DRD2	cg01443318	441	1.0129942693211	0.134490762168421	0.993106697966735	H6PD	cg06033660	441	0.750602510361848	0.112169189056741	0.926744553158493	NR3C2	cg07464571	441	1.29558501901919	0.0860333017651628	0.753815596418569	HTR4	cg19035496	441	-1.05139792275367	0.136848037293569	0.96942796809055	DRD2	cg13094036	441	1.04158672738818	0.117164769888303	0.916984843585253	LEP
cg20697172	441	0.487036283837232	0.132823621943963	0.98821050722751	TPH2	cg10135483	441	0.552224636203329	0.119281697428342	0.98707980895593	HTR1E	cg19226017	441	-0.98604704104217	0.136720335685513	0.993106697966735	HTR3A	cg08030082	441	0.882172663248262	0.112694183927045	0.926744553158493	PROP1	cg14325092	441	1.75145507627425	0.0889538764959142	0.760547468494943	CYP11B1	cg18660363	441	0.61282316157684	0.137617008627219	0.96942796809055	TH	cg02131967	441	-7.95499420430485	0.118103398732598	0.916984843585253	HTR6
cg03974204	441	1.28393762267891	0.133147782895867	0.98821050722751	SRD5A2	cg06033660	441	0.874738654756386	0.121192675005051	0.98707980895593	NR3C2	cg14284211	441	1.61540306749397	0.137224197863417	0.993106697966735	CRH	cg25103337	441	0.87359947861825	0.112940585954966	0.926744553158493	ACE	cg25114611	441	2.48787660033785	0.089542794959096	0.760547468494943	SLC6A4	cg14896516	441	1.20588104371215	0.138326004114863	0.96942796809055	HTRA1	cg17790333	441	1.22462458768949	0.118388550062874	0.916984843585253	HTR3B
cg00307530	441	-0.873330978569863	0.13382122159331	0.98821050722751	HSD3B2	cg13781869	441	1.34845328362674	0.121627172566546	0.98707980895593	LEP	cg21191514	441	0.440551904876277	0.140425365498601	0.993106697966735	HTR2A	cg18529845	441	-0.225117727723701	0.113447102005005	0.926744553158493	TH	cg06285340	441	1.25195716723837	0.0900775854340168	0.760547468494943	NR3C2	cg05952120	441	-5.01752808001711	0.140272528986477	0.96942796809055	HTRA3	cg24257309	441	1.70751635223111	0.119303332195742	0.916984843585253	CRHR1
cg24870096	441	0.529692130069459	0.135247073491508	0.98821050722751	PRKAR1A	cg19839507	441	-0.96456664341684	0.122605233621983	0.98707980895593	TPH2	cg00307530	441	-1.11165029344707	0.141442164706813	0.993106697966735	HSD3B2	cg06841846	441	1.11862202460566	0.117298799356447	0.926744553158493	HTR4	cg02131967	441	-10.6927949048505	0.0911154299014548	0.760547468494943	HTR6	cg23409074	441	-0.748661253065157	0.14055371743197	0.96942796809055	ACE	cg22391185	441	4.34887928532327	0.120322702294581	0.916984843585253	CYP11A1
cg09926649	441	-1.05273803259962	0.136109459647026	0.98821050722751	HTR1E	cg10185667	441	3.51144801011245	0.123695583013407	0.98707980895593	HTR1E	cg07061368	441	-1.07247467178136	0.141808217717307	0.993106697966735	NR3C1	cg01581781	441	-0.49534550586818	0.1186664234225	0.926744553158493	TBX19	cg05136169	441	4.48848767896206	0.09196837594572	0.760547468494943	HTRA3	cg14855334	441	-9.73859449650389	0.141448511347158	0.96942796809055	HTR7	cg13365022	441	1.05513471874276	0.120631804598647	0.916984843585253	AKR1D1
cg03449379	441	1.38744821773197	0.136881776741197	0.98821050722751	POMC	cg16811558	441	2.00148387178312	0.124661103246446	0.98707980895593	HTRA1	cg15572496	441	1.00055122353539	0.145822886426146	0.993106697966735	CYP17A1	cg20647137	441	0.567671181746608	0.118726283913845	0.926744553158493	TPH2	cg03321592	441	0.645352901142612	0.0952107721687507	0.764239292140145	POMC	cg01972879	441	-0.817645705550293	0.142296605647186	0.96942796809055	HTR6	cg18603538	441	1.2159327358023	0.121390298580035	0.916984843585253	HTR3B
cg11202160	441	-0.636030747404748	0.142378389737568	0.98821050722751	CRHR2	cg04132288	441	0.87728973162975	0.125478976360362	0.98707980895593	DHRS9	cg00698685	441	1.75754484641988	0.148422200839062	0.993106697966735	HTR6	cg08789908	441	3.87200263466067	0.118890533911819	0.926744553158493	NR3C1	cg01145353	441	-2.86245018141197	0.0957273220277055	0.764239292140145	TBX19	cg24257309	441	2.06596268134667	0.142666490978145	0.96942796809055	CRHR1	cg05723130	441	-5.61111956138203	0.12229580254768	0.916984843585253	HTRA3
cg01145353	441	-1.30552770435041	0.142698345466425	0.98821050722751	TBX19	cg12751005	441	1.80772728376587	0.126390487517487	0.98707980895593	DDC	cg19303305	441	-1.09344536519774	0.149369544027736	0.993106697966735	TH	cg19502744	441	-0.277858671909042	0.119288757235272	0.926744553158493	DRD2	cg27130954	441	2.63796868091108	0.0962721670149677	0.764239292140145	COMT	cg16188532	441	-2.27203764429522	0.142782831272857	0.96942796809055	HTRA1	cg13996731	441	-6.15961901998337	0.123988063379191	0.916984843585253	CRHR2
cg07843056	441	3.76905027833468	0.143044667809965	0.98821050722751	SRD5A1	cg10874403	441	0.614769770236904	0.127094019154418	0.98707980895593	CRHR2	cg02734600	441	-1.44300217550537	0.150377976406201	0.993106697966735	POMC	cg17790333	441	0.880575113425728	0.120171467441325	0.926744553158493	HTR3B	cg15505103	441	-1.00860180607132	0.0982716214204709	0.764239292140145	HTRA1	cg13094036	441	1.23249307468829	0.143149148830993	0.96942796809055	LEP	cg01714756	441	1.08767577108835	0.124231633816395	0.916984843585253	H6PD
cg10901968	441	4.34975245724768	0.143747962473892	0.98821050722751	DDC	cg02716646	441	0.626472013454305	0.127161992579312	0.98707980895593	DHRS9	cg09297468	441	0.445394397362787	0.15263507967805	0.993106697966735	HTR1E	cg06285340	441	0.66730548805244	0.121904277417634	0.926744553158493	NR3C2	cg12761518	441	-1.70978098110916	0.0990768101335146	0.764239292140145	DDC	cg24394631	441	-0.81725564120932	0.143161001064301	0.96942796809055	SLC6A4	cg13450708	441	0.792927986544008	0.124614799942987	0.916984843585253	DDC
cg13245440	441	0.452205190428197	0.144548598657559	0.98821050722751	DDC	cg04471890	441	-3.11997267512531	0.128913988277626	0.98707980895593	DRD3	cg06836480	441	0.893314530142287	0.153825562754995	0.993106697966735	NR3C1	cg18948125	441	-0.34276886593006	0.123467600282039	0.926744553158493	TH	cg07648740	441	2.10107994768956	0.100016419845586	0.764239292140145	HTR4	cg01489398	441	-1.35709246442409	0.143763254409623	0.96942796809055	TBX19	cg05346287	441	1.05888270056405	0.125307659852393	0.916984843585253	NR3C2
cg18660363	441	0.293770235541576	0.144690350496223	0.98821050722751	TH	cg23549160	441	3.26718849928355	0.129275146577909	0.98707980895593	PRKAR1A	cg03857453	441	-4.75484654083159	0.155826422234193	0.993106697966735	POMC	cg19491599	441	-0.737305740807353	0.124288231542906	0.926744553158493	DRD2	cg10712173	441	-9.40540434436901	0.100628071813352	0.764239292140145	LEP	cg02916102	441	-5.28026271960942	0.14407708011567	0.96942796809055	SRD5A2	cg05437692	441	1.3474530985374	0.125581223629447	0.916984843585253	NR3C2
cg01975877	441	2.67818803706131	0.144691929663417	0.98821050722751	H6PD	cg09798090	441	0.679320451655299	0.130090681343377	0.98707980895593	HTR1E	cg23720528	441	-0.523048169697576	0.156349573844411	0.993106697966735	SLC6A4	cg11750900	441	2.58193879239688	0.125029455941	0.926744553158493	DDC	cg05437692	441	1.78176068806553	0.101043677592812	0.764239292140145	NR3C2	cg17637877	441	-0.985597491527497	0.14651003078613	0.96942796809055	DRD2	cg20007462	441	5.04569725911266	0.127006795414806	0.916984843585253	AVPR1A
cg01581781	441	-0.403820838430097	0.145623772377784	0.98821050722751	TBX19	cg25058023	441	0.53338693692966	0.132400546608308	0.98756904779457	ACE	cg07733851	441	1.30229298643585	0.165496080404227	0.993106697966735	NR3C1	cg01732037	441	0.676217608935859	0.125888694646583	0.926744553158493	H6PD	cg17307280	441	6.89687165815755	0.102673495537636	0.764239292140145	HTR3A	cg18534039	441	0.817852072831662	0.14789742696719	0.96942796809055	TH	cg10901968	441	7.2269031666639	0.127255803811497	0.916984843585253	DDC
cg08258978	441	0.63971342701299	0.145808505976391	0.98821050722751	PROP1	cg20007462	441	4.22156338238926	0.133115463562149	0.98756904779457	AVPR1A	cg15919431	441	3.10188480753889	0.167810495208596	0.993106697966735	HTRA1	cg11361387	441	1.13935608556119	0.126058697550847	0.926744553158493	DDC	cg00840332	441	0.66857204312948	0.103392170768924	0.764239292140145	H6PD	cg00078348	441	0.96424722003284	0.151998551697441	0.96942796809055	TBX19	cg17723156	441	1.1314370334468	0.127278647095275	0.916984843585253	TH
cg18147569	441	3.64569139368182	0.146617010775188	0.98821050722751	DRD2	cg09623773	441	0.626849844160566	0.134180577146001	0.98756904779457	FKBP5	cg05939993	441	0.735105764032731	0.16840917501517	0.993106697966735	HTRA3	cg24433738	441	1.70810877335088	0.1264755116221	0.926744553158493	CRHR1	cg18865272	441	-4.02062517933833	0.104312781456252	0.764239292140145	DRD2	cg20592995	441	-3.39069678317174	0.15321665116102	0.96942796809055	AVPR1A	cg16536918	441	2.87061787986908	0.136414302540108	0.916984843585253	HTRA1
cg08915438	441	1.15834212253162	0.147666997939489	0.98821050722751	HTR4	cg01443318	441	1.04224584413166	0.138571803486929	0.990927793603041	H6PD	cg07833420	441	0.803109591968745	0.172723140361148	0.993106697966735	DRD1	cg00130530	441	1.06253734612321	0.128545364164689	0.926744553158493	H6PD	cg10644575	441	0.853478304974288	0.10524130022115	0.764239292140145	HTR1E	cg20518096	441	-0.965402239111478	0.153372663929736	0.96942796809055	AVPR1A	cg07648740	441	1.53094640624534	0.138031543846162	0.916984843585253	HTR4
cg02661802	441	-4.70138362910529	0.150458648214835	0.98821050722751	DHRS9	cg00562879	441	3.94943698105098	0.139209448894868	0.990927793603041	H6PD	cg14809166	441	-0.677570803042343	0.177000563924277	0.993106697966735	CRH	cg06836480	441	0.83122593690884	0.129046135423882	0.926744553158493	NR3C1	cg07863439	441	4.88195417458771	0.105913597552031	0.764239292140145	NR3C1	cg12598837	441	-2.79034867797528	0.154091658056026	0.96942796809055	DDC	cg04768425	441	0.811155162578084	0.138580796462807	0.916984843585253	NR3C2
cg20709110	441	-0.625036402536848	0.150631767191029	0.98821050722751	HTR2A	cg17085721	441	-4.65188890276455	0.139986566079146	0.990927793603041	HTRA1	cg23757489	441	0.552814356867191	0.178094702644797	0.993106697966735	ACE	cg13947929	441	0.86981175029209	0.129693870890387	0.926744553158493	DDC	cg19107055	441	1.38652941940716	0.107372333463998	0.767243081839831	HTR3B	cg26160839	441	0.994988984772923	0.155274890367628	0.96942796809055	AVP	cg04732193	441	-1.09132018429034	0.140429766193333	0.916984843585253	HTRA3
cg24118521	441	-0.797322224407194	0.150747718939646	0.98821050722751	CRHR1	cg15971888	441	2.61014847995666	0.142788836511485	0.990927793603041	HTRA1	cg26814075	441	-0.465894148772062	0.18109824145402	0.993106697966735	COMT	cg20807790	441	-0.396092212260354	0.132748447188441	0.928677444464757	HTR2A	cg21224972	441	0.901412084080543	0.110116500274336	0.770214987115217	HTR2A	cg26033657	441	-2.65234591584059	0.156793390102463	0.96942796809055	AVP	cg14896516	441	0.952474371491935	0.140859950123522	0.916984843585253	HTRA1
cg17723156	441	0.676916729455897	0.150909334187629	0.98821050722751	TH	cg05912121	441	0.633504038412659	0.144918839117282	0.990927793603041	NR3C2	cg18068537	441	1.18701863320212	0.183379319365276	0.993106697966735	DRD2	cg27345592	441	-1.25944601955491	0.132874912140902	0.928677444464757	COMT	cg16112129	441	1.00149888207815	0.110577048939449	0.770214987115217	HTR7	cg03279206	441	-1.11520628957979	0.157313603756531	0.96942796809055	SRD5A2	cg16188532	441	-1.70642340150896	0.142792430819083	0.916984843585253	HTRA1
cg15189567	441	1.11376203563892	0.152549701227139	0.98821050722751	HTRA1	cg00903099	441	0.549649039356309	0.147027005099458	0.990927793603041	H6PD	cg06943371	441	4.75474871180075	0.18601505349892	0.993106697966735	SRD5A1	cg05961700	441	-0.614781903201419	0.135148570200724	0.928677444464757	HTRA3	cg18954700	441	-11.2560732382014	0.110927701948659	0.770214987115217	DRD2	cg19530293	441	-0.732120616462318	0.158127812439744	0.96942796809055	TH	cg10588377	441	0.898871557339276	0.142875560576429	0.916984843585253	HTR1E
cg21164131	441	0.288518126725006	0.156078274214021	0.98821050722751	HTR2A	cg02734600	441	-1.5252793830976	0.149142740155208	0.990927793603041	POMC	cg23753947	441	-1.50852835870319	0.186315119754769	0.993106697966735	SLC6A4	cg04042861	441	-0.767344421415752	0.135552727707223	0.928677444464757	POMC	cg19594666	441	0.639372945024932	0.114367956400407	0.785500899494311	HTR3A	cg12816057	441	-0.956835009355027	0.158680699855162	0.96942796809055	DDC	cg12598837	441	-2.17149452272537	0.143240261689442	0.916984843585253	DDC
cg20753294	441	-1.33067578273625	0.158739552406894	0.98821050722751	HTR2A	cg10741760	441	0.451240636058214	0.1492583149147	0.990927793603041	LEP	cg20007462	441	3.59955158784477	0.187571594150307	0.993106697966735	AVPR1A	cg06952416	441	1.08359223703942	0.138714075347067	0.928677444464757	HTR4	cg27068143	441	-1.14676427120503	0.117513961425378	0.785500899494311	COMT	cg07778819	441	-0.695911747734507	0.158892779947309	0.96942796809055	DRD1	cg20709110	441	-1.01129089512686	0.144100521415152	0.916984843585253	HTR2A
cg18232548	441	2.37103459545237	0.16370016884082	0.98821050722751	DRD2	cg13245440	441	0.606834906807067	0.150657320441304	0.990927793603041	DDC	cg21240762	441	-5.80260560080334	0.18821925111675	0.993106697966735	HTR2A	cg18147569	441	4.1781934384102	0.142618480163261	0.928677444464757	DRD2	cg16536918	441	3.7462263528271	0.118056399141038	0.785500899494311	HTRA1	cg01714756	441	1.28001616394303	0.159000258733475	0.96942796809055	H6PD	cg04554613	441	1.52905460822674	0.144515966648557	0.916984843585253	HTRA3
cg02916102	441	-2.43705861459222	0.16780853942627	0.98821050722751	SRD5A2	cg12670061	441	-6.37497889418691	0.151044027809009	0.990927793603041	CRHR2	cg15347662	441	-1.65348078322043	0.18883487397817	0.993106697966735	HTRA1	cg24934431	441	-1.12758913917505	0.144626605022955	0.928677444464757	ACE	cg10847032	441	0.495466063873955	0.118982714801998	0.785500899494311	HTR5A	cg08208133	441	-1.17418857749865	0.159502032058519	0.96942796809055	NR3C1	cg01718447	441	1.11355726397248	0.14581002379367	0.916984843585253	H6PD
cg22601917	441	0.895206862279101	0.167940452135427	0.98821050722751	HSD11B2	cg24118521	441	-1.07200465146133	0.154972841471295	0.990927793603041	CRHR1	cg12083122	441	-2.09336590803418	0.190679327819742	0.993106697966735	HTR5A	cg15971888	441	2.20434331584458	0.145226426521493	0.928677444464757	HTRA1	cg04967039	441	0.92029083452439	0.119371490569316	0.785500899494311	NR3C2	cg12248358	441	1.17684798399069	0.159712997475327	0.96942796809055	HTR5A	cg23881278	441	-5.15643897165118	0.152433500477078	0.916984843585253	PRKAR1A
cg03472798	441	1.51330042933866	0.168506007351459	0.98821050722751	POMC	cg21286526	441	2.19652119708239	0.155432924737078	0.990927793603041	HTR2A	cg09863441	441	1.55603250198592	0.191129855064993	0.993106697966735	FKBP5	cg02236913	441	-0.387852809450901	0.147047926868123	0.928677444464757	POMC	cg12243453	441	-1.71823051477047	0.120516460792711	0.785500899494311	DDC	cg07061368	441	-1.55962100787665	0.161118750685236	0.96942796809055	NR3C1	cg18068240	441	-8.68750585723956	0.153185820226778	0.916984843585253	TH
cg18640030	441	0.293658837487764	0.16891172307524	0.98821050722751	HTR3B	cg23329208	441	-0.766514996990842	0.156494686835146	0.990927793603041	SLC6A4	cg16332610	441	-2.90872180183737	0.191265920517249	0.993106697966735	HTR7	cg03974204	441	1.40347698017314	0.149499543046416	0.928677444464757	SRD5A2	cg08845721	441	1.68230375953544	0.120600002232143	0.785500899494311	PROP1	cg24718866	441	-2.83173568425261	0.163929664680167	0.96942796809055	PRKAR1A	cg03363743	441	1.14314001601227	0.153590356456786	0.916984843585253	SRD5A2
cg13645651	441	0.347226689802675	0.16953680155163	0.98821050722751	CRHR2	cg21141047	441	3.8856837067439	0.159121394840477	0.990927793603041	HTR2A	cg19530293	441	0.435438530021868	0.191830215232769	0.993106697966735	TH	cg10590842	441	0.906904921631112	0.14993455750011	0.928677444464757	HTR1E	cg04490037	441	1.1760268067012	0.123199869982591	0.791807876087441	DRD3	cg18450270	441	-1.23640871664709	0.164126909208289	0.96942796809055	DRD2	cg12758687	441	-0.828054547396576	0.154274271771986	0.916984843585253	LEP
cg21661983	441	0.668278810852138	0.170132468013771	0.98821050722751	SERPINA6	cg08258978	441	0.841961671759171	0.163362212302689	0.990927793603041	PROP1	cg02955911	441	-2.28992639022555	0.192829835224048	0.993106697966735	POMC	cg02261408	441	-0.730969636738658	0.150317236652732	0.928677444464757	SRD5A2	cg04863452	441	1.87978872910744	0.126453118975094	0.791807876087441	NR3C2	cg25920792	441	8.79809177290731	0.166091326060814	0.96942796809055	MC2R	cg01274715	441	-3.10900769655823	0.154612609583186	0.916984843585253	HTR6
cg19715936	441	-1.80734958805692	0.170160214188762	0.98821050722751	TH	cg26558919	441	5.11061158542672	0.163563509237357	0.990927793603041	COMT	cg13381984	441	-0.417997380884711	0.195231328844472	0.993106697966735	HTR5A	cg09798090	441	0.544528860897197	0.150430264558109	0.928677444464757	HTR1E	cg01516872	441	1.48553209533913	0.127379970941222	0.791807876087441	HSD11B1	cg05346287	441	1.23003721218139	0.16950330929915	0.96942796809055	NR3C2	cg16845257	441	1.11321929065056	0.155265855078674	0.916984843585253	HTRA1
cg14847514	441	-0.850430902872317	0.172290166205883	0.98821050722751	HTRA1	cg18147569	441	4.68178862116773	0.165131198481814	0.990927793603041	DRD2	cg19594666	441	-0.347776876545281	0.195897600751418	0.993106697966735	HTR3A	cg00698685	441	1.54741365920708	0.150765412877908	0.928677444464757	HTR6	cg24547396	441	2.5252124501401	0.127715617778296	0.791807876087441	SLC6A4	cg18755984	441	0.879357036050297	0.170875344924292	0.96942796809055	TH	cg00078348	441	0.748721995782645	0.155406832630447	0.916984843585253	TBX19
cg14199144	441	0.489142983895715	0.175178980076608	0.98821050722751	DDC	cg23169111	441	1.21118409503536	0.16619412303468	0.990927793603041	CRHR1	cg24394631	441	0.454932316960392	0.197299909005575	0.993106697966735	SLC6A4	cg21286526	441	1.87078643446576	0.151774196076656	0.928677444464757	HTR2A	cg26814075	441	0.790430373674431	0.131190224220201	0.791807876087441	COMT	cg16112129	441	0.903256015760599	0.171103277211766	0.96942796809055	HTR7	cg06860277	441	1.31955009459107	0.155681512860841	0.916984843585253	NR3C1
cg07485685	441	3.90862467667347	0.175571718170335	0.98821050722751	SRD5A1	cg20423536	441	-1.15381997898956	0.166584079144885	0.990927793603041	TPH2	cg19491599	441	-0.711694183098563	0.198809673904695	0.993106697966735	DRD2	cg13245440	441	0.50554906384405	0.152407438620002	0.928677444464757	DDC	cg16683741	441	3.51269745896224	0.131770409823033	0.791807876087441	HTRA1	cg08700190	441	1.094881569113	0.172898655774757	0.96942796809055	PROP1	cg24870096	441	0.790954087846335	0.156322528158051	0.916984843585253	PRKAR1A
cg23951474	441	0.559885576794143	0.177765301375343	0.98821050722751	CRHR1	cg03472798	441	2.0382781889776	0.171170425945816	0.990927793603041	POMC	cg06531741	441	0.566845508146669	0.200010263866388	0.993106697966735	NR3C1	cg18595639	441	2.40652959821888	0.153103202968121	0.928677444464757	DRD2	cg14402224	441	1.8286512201674	0.133191104762447	0.791807876087441	CRH	cg23027580	441	-5.05202916815878	0.174062527452062	0.96942796809055	HSD11B2	cg21013206	441	-0.947642260732968	0.156760547691935	0.916984843585253	HTR2A
cg09798090	441	0.446987712610694	0.179350386523317	0.98821050722751	HTR1E	cg04424630	441	-4.99243860955681	0.173077745480688	0.990927793603041	HTR3C	cg10300814	441	-2.23752463973275	0.202083331645683	0.993106697966735	FKBP5	cg20387815	441	2.03886383250304	0.15349043556123	0.928677444464757	AVPR1A	cg18068240	441	-11.2794114081682	0.133321679763543	0.791807876087441	TH	cg04087608	441	-1.66205520396819	0.174546511450638	0.96942796809055	POMC	cg04132288	441	0.922476660591703	0.160666164509133	0.916984843585253	DHRS9
cg08845721	441	0.738046024483383	0.179969571578107	0.98821050722751	PROP1	cg02261408	441	-0.830101490318403	0.173630388903241	0.990927793603041	SRD5A2	cg14418802	441	-1.35835642416342	0.202474276362737	0.993106697966735	CYP11B1	cg24394631	441	0.441124927321599	0.153938380740082	0.928677444464757	SLC6A4	cg13996731	441	-7.4003866882755	0.134163546470434	0.791807876087441	CRHR2	cg16845257	441	1.38009859435525	0.175095442264913	0.96942796809055	HTRA1	cg19194405	441	2.14151862371902	0.160885851314045	0.916984843585253	TH
cg20592995	441	-1.58603819903269	0.181205547004807	0.98821050722751	AVPR1A	cg08208133	441	-0.766931884227988	0.17484608039544	0.990927793603041	NR3C1	cg22900229	441	3.45641735914094	0.204375799148151	0.993106697966735	HSD11B2	cg02579332	441	0.342909380421417	0.159529437557913	0.93594908747645	SRD5A2	cg10590842	441	1.63839878624111	0.134455918563548	0.791807876087441	HTR1E	cg14754494	441	-1.38661943671842	0.178794720086867	0.96942796809055	CYP11B1	cg10847032	441	0.366073495153571	0.161863628421263	0.916984843585253	HTR5A
cg13527387	441	0.383409775769053	0.182625551307243	0.98821050722751	CRHR2	cg12746356	441	-7.01717779934909	0.175050766963455	0.990927793603041	HTR5A	cg07778819	441	0.383296499427402	0.204592916813495	0.993106697966735	DRD1	cg14847514	441	-0.982283961134574	0.161980567384077	0.93594908747645	HTRA1	cg17085721	441	-6.73113865060566	0.136180016725931	0.791807876087441	HTRA1	cg07275757	441	-0.836734153884909	0.181112292170426	0.96942796809055	DRD1	cg05136169	441	2.98400132979427	0.162224859618682	0.916984843585253	HTRA3
cg18785742	441	-1.76577761095198	0.184893766896536	0.98821050722751	DRD2	cg26466234	441	2.31946648959846	0.175313671472802	0.990927793603041	AVP	cg01220564	441	1.07360522327762	0.205166666358865	0.993106697966735	H6PD	cg05912121	441	0.505961069759205	0.162363325672566	0.93594908747645	NR3C2	cg25058023	441	-0.778206330288522	0.136961720302076	0.791807876087441	ACE	cg10276623	441	-0.635754215990939	0.181484328621051	0.96942796809055	HTR1E	cg23035419	441	1.96010425053742	0.165190316766848	0.916984843585253	HSD11B2
cg08215831	441	0.35756751276972	0.185376860477627	0.98821050722751	NR3C1	cg23409074	441	0.444539967578244	0.175666410308687	0.990927793603041	ACE	cg03974204	441	1.40498198297936	0.206849795906256	0.993106697966735	SRD5A2	cg15572496	441	0.837453671984345	0.163192036423133	0.93594908747645	CYP17A1	cg26464934	441	1.06482149693044	0.137351259839137	0.791807876087441	AVP	cg18701449	441	-0.826348894294148	0.18196364697267	0.96942796809055	DRD2	cg01804500	441	-3.32998424696256	0.16544283843302	0.916984843585253	H6PD
cg05939495	441	0.888277309517181	0.186484300076519	0.98821050722751	NR3C2	cg23612570	441	-0.884882866092972	0.176576201814378	0.990927793603041	PRKAR1A	cg18584905	441	3.96699587457985	0.207992680993332	0.993106697966735	TH	cg10588377	441	0.614067945654272	0.16403021889423	0.93594908747645	HTR1E	cg13245440	441	0.889362260221242	0.138801202116037	0.791807876087441	DDC	cg04199256	441	-2.18213026061167	0.181970189293867	0.96942796809055	DRD3	cg06943371	441	5.99989465284682	0.165871045407079	0.916984843585253	SRD5A1
cg07061368	441	-0.731677649144501	0.188271650570319	0.98821050722751	NR3C1	cg06778429	441	6.70984566690511	0.178471016323883	0.990927793603041	NR3C1	cg10097150	441	0.407327687966734	0.2080183935156	0.993106697966735	FKBP5	cg00903099	441	0.439807345992729	0.164274475626397	0.93594908747645	H6PD	cg23809645	441	-1.11782581921633	0.139068952005688	0.791807876087441	SLC6A4	cg04566694	441	-1.48450349276912	0.183735520683287	0.96942796809055	HTRA3	cg03449379	441	2.03207842742321	0.166479369016557	0.916984843585253	POMC
cg06457577	441	-2.16032270446465	0.190018666890628	0.98821050722751	DRD1	cg04144768	441	1.39983703499005	0.179394694262544	0.990927793603041	HTR3C	cg00308665	441	0.48765082773508	0.208024999912239	0.993106697966735	H6PD	cg26466234	441	1.98392445574806	0.164362520693505	0.93594908747645	AVP	cg00293936	441	4.25128076552619	0.139329419893499	0.791807876087441	HTR6	cg10207656	441	2.11273084044027	0.183745667579149	0.96942796809055	FKBP5	cg23409074	441	-0.538723627821725	0.166678302701359	0.916984843585253	ACE
cg18847882	441	1.37464639492197	0.191479820744597	0.98821050722751	DRD2	cg15189567	441	1.4297337368884	0.182513018728472	0.990927793603041	HTRA1	cg04087608	441	-1.00319546691595	0.211596970625186	0.993106697966735	POMC	cg15403517	441	-0.196753070540858	0.165903314447055	0.93594908747645	HTRA1	cg20709110	441	-1.25807092361436	0.141835291096627	0.791807876087441	HTR2A	cg01718447	441	1.30186025606809	0.184133944137932	0.96942796809055	H6PD	cg09277575	441	0.584840332712857	0.168744050727486	0.916984843585253	HTR1E
cg20813374	441	0.72494507335584	0.192493391230464	0.98821050722751	HTR2A	cg00130530	441	1.11150043187665	0.1830481321177	0.990927793603041	H6PD	cg00712943	441	0.38513527936989	0.212884162144694	0.993106697966735	HTR6	cg17085721	441	-3.65590876661964	0.166588764211162	0.93594908747645	HTRA1	cg05939993	441	1.15499228503284	0.142179313204339	0.791807876087441	HTRA3	cg11152298	441	9.18757002124859	0.18441326534307	0.96942796809055	HTR5A	cg17637877	441	-0.729178037685609	0.170086153835152	0.916984843585253	DRD2
cg01220564	441	0.838467844875411	0.195641353018803	0.98821050722751	H6PD	cg12793238	441	3.30453370366847	0.184854399229838	0.990927793603041	DDC	cg18726036	441	-1.47509668579879	0.213467097109466	0.993106697966735	DRD2	cg07806248	441	-0.388034882800648	0.16926162559417	0.943761791191737	NR3C1	cg19194405	441	2.92833345603355	0.142344287788108	0.791807876087441	TH	cg06778429	441	-10.246742867215	0.184833863695167	0.96942796809055	NR3C1	cg09297468	441	0.526743811959294	0.171183645058988	0.916984843585253	HTR1E
cg12083122	441	-1.57194385742652	0.199236468144206	0.98821050722751	HTR5A	cg06149357	441	0.3793692833127	0.185583982884897	0.990927793603041	HTRA3	cg01330016	441	-2.29771465151668	0.215522749858453	0.993106697966735	H6PD	cg22827011	441	0.33650012288928	0.17151786563377	0.943948568836907	HSD11B2	cg14558428	441	0.40990403401561	0.14308484717341	0.791807876087441	CRH	cg17305181	441	-1.05140802852033	0.187243597105836	0.96942796809055	TH	cg18755984	441	0.680450840771271	0.171236348574811	0.916984843585253	TH
cg27551605	441	0.475972164250715	0.199484588067862	0.98821050722751	COMT	cg08033551	441	1.24310300603971	0.185735630534379	0.990927793603041	NR3C1	cg09623773	441	0.496623259257644	0.216103172780047	0.993106697966735	FKBP5	cg19530293	441	0.396621142611256	0.174895538104056	0.943948568836907	TH	cg08560888	441	1.10862602192924	0.147315790995821	0.807185584292739	NR3C1	cg20007462	441	5.67661811999122	0.187473242337787	0.96942796809055	AVPR1A	cg01972879	441	-0.58341063898294	0.172904596972969	0.916984843585253	HTR6
cg22827011	441	0.275318404820809	0.201144302823001	0.98821050722751	HSD11B2	cg24862443	441	-2.38269398058871	0.18920635116357	0.990927793603041	ACE	cg08560888	441	0.648724383994718	0.216928540766897	0.993106697966735	NR3C1	cg25058023	441	0.400767933099873	0.17714652600927	0.943948568836907	ACE	cg02040921	441	-4.85280706617362	0.148057138423261	0.807185584292739	TBX19	cg18726036	441	-2.34279561544263	0.187480561096609	0.96942796809055	DRD2	cg19035496	441	-0.737986105149231	0.173634597952713	0.916984843585253	DRD2
cg08948964	441	-0.441840327726095	0.203423842439849	0.98821050722751	FKBP5	cg00307530	441	-1.02917251948573	0.196554763357418	0.990927793603041	HSD3B2	cg02501334	441	3.60558037693672	0.217620557338948	0.993106697966735	POMC	cg23601416	441	0.929309552996778	0.177964750587034	0.943948568836907	CRHR1	cg12639324	441	-5.88870822531956	0.150176465999788	0.810879185466736	DDC	cg25011257	441	-1.62736518025101	0.188195765475346	0.96942796809055	SLC6A4	cg22812013	441	-1.52845609422929	0.175773230542501	0.916984843585253	HSD11B2
cg08033551	441	0.87645995988059	0.20444167660072	0.98821050722751	NR3C1	cg06952416	441	1.12664644148289	0.196761142032509	0.990927793603041	HTR4	cg17524078	441	0.395276850927142	0.218100830927321	0.993106697966735	HTR3A	cg02661802	441	-4.98319327383908	0.179092830475601	0.943948568836907	DHRS9	cg02712145	441	1.51331503018933	0.151534343941809	0.810879185466736	SRD5A2	cg05141787	441	-1.31963624429892	0.189790491115765	0.96942796809055	HTRA3	cg25836061	441	1.91364638986013	0.178551855226435	0.916984843585253	MC4R
cg13857519	441	0.467113801719789	0.205783185963642	0.98821050722751	HTR5A	cg20387815	441	2.18173662970322	0.196961853796259	0.990927793603041	AVPR1A	cg08215831	441	0.430611909354606	0.220441078714131	0.993106697966735	NR3C1	cg24862443	441	-2.07582335445753	0.180466462336884	0.943948568836907	ACE	cg11247289	441	1.62609868519692	0.152653714265447	0.810879185466736	DDC	cg15971888	441	-3.77026803537886	0.189821051227558	0.96942796809055	HTRA1	cg01586609	441	0.616985636461929	0.178695323405599	0.916984843585253	HTR6
cg10335743	441	-0.596195829011721	0.208079297366894	0.98821050722751	FKBP5	cg11202160	441	-0.763145165579331	0.19720047295637	0.990927793603041	CRHR2	cg24680141	441	4.01894346019094	0.222357965687107	0.993106697966735	ACE	cg20804163	441	-1.92209540599769	0.18169047203439	0.943948568836907	HTR2A	cg20592995	441	-3.26622097581339	0.155183977920399	0.810879185466736	AVPR1A	cg09672383	441	-0.646731935688977	0.190820622958941	0.96942796809055	FKBP5	cg14774364	441	0.706092769225147	0.18024880309153	0.916984843585253	CRH
cg06033660	441	0.522656848182192	0.208875448989561	0.98821050722751	NR3C2	cg19491599	441	-0.730811117498956	0.201086023919555	0.990927793603041	DRD2	cg00242031	441	-0.580455984799987	0.223717147955217	0.993106697966735	H6PD	cg00140191	441	-3.22671066059651	0.184098242578855	0.943948568836907	HTR6	cg01274715	441	-3.78915710011962	0.158535555802574	0.810879185466736	HTR6	cg21683009	441	-9.37960431651994	0.193072895275062	0.96942796809055	SERPINA6	cg27130954	441	1.73338200426408	0.181008769896333	0.916984843585253	COMT
cg18603538	441	0.61524984502529	0.209138934848373	0.98821050722751	HTR3B	cg14642437	441	-1.86037811027932	0.201466505140316	0.990927793603041	CRH	cg20246820	441	-3.2187947772398	0.223861657806737	0.993106697966735	TPH2	cg05942508	441	1.00372700077029	0.185678274740927	0.943948568836907	NR3C2	cg22129276	441	1.22017577275004	0.158596482005468	0.810879185466736	CYP11A1	cg12825070	441	-0.409103289479111	0.194395129845732	0.96942796809055	CRHR2	cg16332610	441	-3.62755290560721	0.181396235733042	0.916984843585253	HTR7
cg16845257	441	0.626904340424431	0.209366268284174	0.98821050722751	HTRA1	cg22129276	441	0.76977204877419	0.202415115392886	0.990927793603041	CYP11A1	cg23185751	441	-0.601731512999498	0.225954672670673	0.993106697966735	CRHR1	cg07275757	441	0.464928388516627	0.186476254749159	0.943948568836907	DRD1	cg17860381	441	-9.26596764212566	0.159113813821375	0.810879185466736	HTR3B	cg05961700	441	-0.951675748850399	0.197155904801828	0.96942796809055	HTRA3	cg03667083	441	0.866900298236237	0.184672568529558	0.916984843585253	DHRS9
cg02261408	441	-0.554190587900229	0.2119906650872	0.98821050722751	SRD5A2	cg04204669	441	0.784326540314075	0.203561777017597	0.990927793603041	DRD3	cg19035496	441	0.543080845760982	0.226142463057321	0.993106697966735	DRD2	cg23720528	441	-0.426754522742415	0.186842712757627	0.943948568836907	SLC6A4	cg21256649	441	4.05452280208481	0.160461907199624	0.810879185466736	HTR2A	cg24738325	441	-5.04828272609712	0.200152652780801	0.96942796809055	SLC6A4	cg26724798	441	0.509061225704471	0.185008410946968	0.916984843585253	COMT
cg24057680	441	3.71490874018328	0.214814240660464	0.98821050722751	ACE	cg00701951	441	-0.976244446178655	0.205527292192254	0.990927793603041	HSD11B1	cg10590842	441	0.867147785700408	0.22942402146158	0.993106697966735	HTR1E	cg06457577	441	-2.4431127081906	0.187488991184434	0.943948568836907	DRD1	cg02661802	441	-9.00322000427943	0.16151356460561	0.810879185466736	DHRS9	cg09490603	441	-3.86982905367413	0.201640211696308	0.96942796809055	FKBP5	cg10953410	441	0.390397264172942	0.185462774534903	0.916984843585253	HTR5A
cg24934431	441	-0.851028391498402	0.216337149916389	0.98821050722751	ACE	cg25017777	441	2.12694104960894	0.207325131500489	0.990927793603041	ACE	cg17220584	441	0.468679107542454	0.229588326567073	0.993106697966735	HTR3A	cg09361691	441	0.920927857505641	0.187542329735568	0.943948568836907	HTR1E	cg23913482	441	-5.91992635644667	0.16446912798115	0.810879185466736	CRHR1	cg05942508	441	-1.8417274872106	0.203559751300577	0.96942796809055	NR3C2	cg01489398	441	-0.952174556859446	0.187012801598205	0.916984843585253	TBX19
cg10538202	441	-0.40436069371511	0.217446672348852	0.98821050722751	HTR1E	cg21577406	441	-0.99665536672683	0.20776697919156	0.990927793603041	SERPINA6	cg25284492	441	-2.76039358544852	0.229792188831834	0.993106697966735	CRHR1	cg13025668	441	1.57859214623242	0.189883079691349	0.943948568836907	DDC	cg15403517	441	0.343645531562755	0.167293555436421	0.810879185466736	HTRA1	cg02534661	441	4.27365585479231	0.203580271616745	0.96942796809055	DHRS9	cg23601416	441	-1.2430397256424	0.192776842592112	0.916984843585253	CRHR1
cg18845001	441	-0.287746130499896	0.217694819332427	0.98821050722751	HTR3A	cg20753294	441	-1.60789105097833	0.208045290037336	0.990927793603041	HTR2A	cg20804163	441	-2.00686101682266	0.230273088686542	0.993106697966735	HTR2A	cg27521571	441	-0.462574091303319	0.18998165892128	0.943948568836907	COMT	cg06045576	441	1.32626984715077	0.168583552022199	0.810879185466736	HTRA3	cg13450708	441	0.847567438402109	0.205155945438079	0.96942796809055	DDC	cg12639324	441	-4.27024168828547	0.193033664868915	0.916984843585253	DDC
cg04042861	441	-0.55958133267351	0.218443208077119	0.98821050722751	POMC	cg05082563	441	0.687129167711682	0.208664041596341	0.990927793603041	HTRA3	cg00358132	441	0.892918792696747	0.231086307490557	0.993106697966735	HTR6	cg19500607	441	0.484315457356864	0.190930481927623	0.943948568836907	TH	cg24525872	441	-11.0152587878417	0.169137522432777	0.810879185466736	CRHR1	cg16897216	441	0.793610441705873	0.2052125930727	0.96942796809055	CYP17A1	cg10913456	441	-7.63709877598765	0.193403982941321	0.916984843585253	CRHR2
cg21773872	441	0.559923449558007	0.222732393311733	0.98821050722751	CYP11A1	cg04750517	441	-3.00958753876345	0.208981422821684	0.990927793603041	HTRA3	cg10874403	441	0.457658704175408	0.232423811303309	0.993106697966735	CRHR2	cg10097150	441	0.364320063444948	0.196079744732427	0.943948568836907	FKBP5	cg12583095	441	-3.74311426481106	0.169241035540863	0.810879185466736	LEP	cg08573687	441	-0.544089468577759	0.206325768026012	0.96942796809055	SRD5A1	cg03591753	441	1.1597454644149	0.194964934767574	0.916984843585253	POMC
cg01804500	441	-1.8707693543124	0.222874166911593	0.98821050722751	H6PD	cg17036562	441	-0.362674432669378	0.209065330197912	0.990927793603041	HTR7	cg19826045	441	-1.85069547771667	0.232737380361655	0.993106697966735	AVPR1A	cg16188532	441	1.01881030686737	0.196683603240832	0.943948568836907	HTRA1	cg02916102	441	-4.77729555624861	0.169292121471706	0.810879185466736	SRD5A2	cg15189567	441	2.01148642134167	0.209914628630922	0.96942796809055	HTRA1	cg06669759	441	1.36812073618479	0.197391123295166	0.916984843585253	NR3C1
cg03857453	441	-3.15134346928467	0.222898300535887	0.98821050722751	POMC	cg12761518	441	0.989720541648874	0.209656877200222	0.990927793603041	DDC	cg16012111	441	-3.56393095065426	0.233231381238532	0.993106697966735	HTRA1	cg01614101	441	-0.349826953938558	0.199983144028915	0.943948568836907	H6PD	cg10216820	441	1.46595816260683	0.169687392007997	0.810879185466736	FKBP5	cg12793238	441	-4.50334052630381	0.21207907646003	0.96942796809055	DDC	cg26464411	441	-3.35796169591431	0.197407797628788	0.916984843585253	AVP
cg25011257	441	0.714970731335905	0.225565511756143	0.98821050722751	SLC6A4	cg27551605	441	0.63038839031006	0.210760989192796	0.990927793603041	COMT	cg00130530	441	0.957722153539421	0.233426019693363	0.993106697966735	H6PD	cg23549160	441	2.37124839786672	0.201954345573007	0.943948568836907	PRKAR1A	cg22141389	441	2.662995431046	0.170162094013656	0.810879185466736	CYP11A1	cg22129276	441	1.12671148533977	0.212147995375332	0.96942796809055	CYP11A1	cg01462353	441	-1.10262149122008	0.19806037321119	0.916984843585253	H6PD
cg19878200	441	0.419826063308488	0.226201359207162	0.98821050722751	AVPR1A	cg03591753	441	0.967352011285167	0.211790579270962	0.990927793603041	POMC	cg07806248	441	-0.383227484399454	0.233559793028987	0.993106697966735	NR3C1	cg10741760	441	0.332255363028161	0.202663632732353	0.943948568836907	LEP	cg07102705	441	0.64080391481004	0.170670309507442	0.810879185466736	HTR4	cg03472798	441	2.76425086655622	0.212161401284168	0.96942796809055	POMC	cg27208536	441	0.862397328677194	0.199224554177921	0.916984843585253	COMT
cg17524078	441	0.296838452029583	0.226847562072928	0.98821050722751	HTR3A	cg14847514	441	-1.04929536246761	0.212106054152477	0.990927793603041	HTRA1	cg03449379	441	1.43727835684689	0.237813441604262	0.993106697966735	POMC	cg23409074	441	0.348937772720415	0.203518693499164	0.943948568836907	ACE	cg17342132	441	1.87629173095694	0.171995158500235	0.810879185466736	HTR3B	cg19839507	441	-1.15435225467359	0.212299089802286	0.96942796809055	TPH2	cg15505103	441	-0.629406056821564	0.200864225735604	0.916984843585253	HTRA1
cg01845356	441	0.481453185172008	0.22684927393446	0.98821050722751	H6PD	cg13000004	441	-1.10422874761624	0.213635070082247	0.990927793603041	DDC	cg20387815	441	1.94208103056244	0.240502312266621	0.993106697966735	AVPR1A	cg23335356	441	-0.412319306848005	0.20388244709851	0.943948568836907	ACE	cg21286526	441	3.04694092526119	0.172368614328373	0.810879185466736	HTR2A	cg17114375	441	-4.09264606685573	0.21336082485709	0.96942796809055	HTRA1	cg16683741	441	2.37298896714504	0.201807617540833	0.916984843585253	HTRA1
cg11750900	441	1.79977623312403	0.227049827320986	0.98821050722751	DDC	cg10590842	441	0.927266412103189	0.219015223792966	0.990927793603041	HTR1E	cg06033660	441	0.636350071061654	0.240800968029934	0.993106697966735	NR3C2	cg03472798	441	1.59570431855004	0.204288439246129	0.943948568836907	POMC	cg26132809	441	2.21080095276183	0.17392768144928	0.810879185466736	AVP	cg13381984	441	-0.628224888846446	0.213727301287286	0.96942796809055	HTR5A	cg12243453	441	-1.1321957024651	0.203273007714385	0.916984843585253	DDC
cg06841846	441	0.760757171210141	0.231179142478117	0.98821050722751	HTR4	cg19226017	441	-0.865919017046727	0.219875549139211	0.990927793603041	HTR3A	cg25114611	441	1.02451938033333	0.241021037672149	0.993106697966735	SLC6A4	cg17860381	441	-4.8519297544296	0.206329102035004	0.943948568836907	HTR3B	cg19839507	441	-1.20828493966183	0.173982246963782	0.810879185466736	TPH2	cg21901156	441	-0.97808884088037	0.214467992451105	0.96942796809055	CYP11A1	cg14402224	441	1.24778896119702	0.204686660821989	0.916984843585253	CRH
cg05136169	441	1.62126928580588	0.231789470995128	0.98821050722751	HTRA3	cg13857519	441	0.611618918740668	0.224869004922144	0.990927793603041	HTR5A	cg08479865	441	0.334720452005903	0.242552616532325	0.993106697966735	PROP1	cg20423536	441	-0.888873865066701	0.206757641421172	0.943948568836907	TPH2	cg27579609	441	-3.82609880720718	0.174521834217459	0.810879185466736	COMT	cg27208536	441	1.08374767721311	0.215770407777439	0.96942796809055	COMT	cg16335926	441	3.19221358958574	0.205837496800923	0.916984843585253	HTRA1
cg06961323	441	-0.48929460498838	0.231863452969937	0.98821050722751	PROP1	cg25669230	441	0.781804903969835	0.226062262838438	0.990927793603041	MC4R	cg08573687	441	0.321273562313906	0.244666601710865	0.993106697966735	SRD5A1	cg18421538	441	0.838755165974774	0.206877569436517	0.943948568836907	TH	cg15926585	441	1.01843252742112	0.176182806055844	0.810879185466736	CYP17A1	cg05756489	441	-0.738138311724865	0.216169998200377	0.96942796809055	HTRA3	cg18233497	441	0.338292820342211	0.20644850684013	0.916984843585253	TPH1
cg25736198	441	1.18872647826958	0.234577786946757	0.98821050722751	MC2R	cg19930203	441	0.824584546015935	0.226483524713995	0.990927793603041	TPH2	cg05942508	441	1.02964152279317	0.244708090601968	0.993106697966735	NR3C2	cg25017777	441	1.77444534234016	0.208581401530013	0.943948568836907	ACE	cg05141787	441	-1.27159308154497	0.176278083797117	0.810879185466736	HTRA3	cg22584138	441	-1.12896077491763	0.216335402848348	0.96942796809055	HSD11B2	cg12583095	441	-2.76633995105206	0.209294967594181	0.916984843585253	LEP
cg10906284	441	0.263666431729744	0.234729174880841	0.98821050722751	CRHR2	cg09191750	441	1.64762904713091	0.228277119613671	0.990927793603041	FKBP5	cg14402224	441	-0.955409559288601	0.245606276041639	0.993106697966735	CRH	cg07061368	441	-0.794254460306596	0.209777915288263	0.943948568836907	NR3C1	cg16332610	441	-4.48047513304871	0.182097790162905	0.831594932244063	HTR7	cg00242031	441	-0.909986600251192	0.21933488661775	0.96942796809055	H6PD	cg23720528	441	-0.564132370659548	0.210276930058912	0.916984843585253	SLC6A4
cg22391185	441	2.09348912997029	0.237265566895623	0.98821050722751	CYP11A1	cg06457577	441	-2.66755912081114	0.228910195575081	0.990927793603041	DRD1	cg06952416	441	0.976729506649872	0.247541374159386	0.993106697966735	HTR4	cg19035496	441	0.483424478731025	0.21494700339511	0.943948568836907	DRD2	cg26741280	441	3.46275944119028	0.183041275847199	0.831594932244063	COMT	cg11469319	441	3.79663202531699	0.222963720504978	0.96942796809055	CRHR2	cg25103337	441	0.946781194454665	0.211925473436979	0.916984843585253	ACE
cg22701672	441	1.5102085917228	0.238079786476221	0.98821050722751	HSD11B2	cg17860381	441	-5.54002573183404	0.229450081495897	0.990927793603041	HTR3B	cg18232548	441	2.57464044362782	0.247603821498116	0.993106697966735	DRD2	cg23329208	441	-0.560813357954994	0.21612657676412	0.943948568836907	SLC6A4	cg25394652	441	6.64517749039904	0.184467881770349	0.832485444578627	CRHR1	cg23974739	441	1.05137479487591	0.224285438784098	0.96942796809055	ACE	cg21796427	441	-1.96698214251458	0.213622472611933	0.916984843585253	CYP11A1
cg00903099	441	0.326130173174031	0.238678255080887	0.98821050722751	H6PD	cg03974204	441	1.4075358184209	0.229629750098063	0.990927793603041	SRD5A2	cg17537380	441	-0.423874582458916	0.247982392562953	0.993106697966735	HTR3B	cg21713424	441	4.17770132429146	0.216263814958872	0.943948568836907	CYP11A1	cg09920557	441	-7.81621287705407	0.185499474063716	0.832485444578627	HTR1E	cg26464411	441	-4.10743795784838	0.224582444909691	0.96942796809055	AVP	cg23329208	441	0.783530434727923	0.214129479231196	0.916984843585253	SLC6A4
cg12639324	441	-2.42308806838131	0.239072748237521	0.98821050722751	DDC	cg20697172	441	0.525531740681651	0.234190543324047	0.990927793603041	TPH2	cg25836061	441	-1.35347767721387	0.248965141416463	0.993106697966735	MC4R	cg08033551	441	0.976523554606472	0.217331651378697	0.943948568836907	NR3C1	cg24877195	441	-4.60027606402846	0.189855426492482	0.844209685910916	ACE	cg06828613	441	-0.838919497617808	0.227796973128396	0.96942796809055	NR3C1	cg19285508	441	-2.36210349405457	0.214691978258724	0.916984843585253	DRD2
cg18233497	441	0.197575836753356	0.240051645925063	0.98821050722751	TPH1	cg06417522	441	4.03988523446113	0.234799446558502	0.990927793603041	NR3C1	cg03363743	441	-0.769700119976309	0.249557843250091	0.993106697966735	SRD5A2	cg19285508	441	2.09314457774761	0.218389890766334	0.943948568836907	DRD2	cg01443318	441	1.32648027548089	0.190526287870513	0.844209685910916	H6PD	cg01049782	441	-1.11083831655519	0.227889970011192	0.96942796809055	HSD11B1	cg06836480	441	0.934854954930426	0.214945416258851	0.916984843585253	NR3C1
cg25276126	441	0.394698729204476	0.240379926278317	0.98821050722751	SLC6A4	cg12807275	441	-0.603751689790084	0.236702003504356	0.990927793603041	DDC	cg05723130	441	-3.39723261457339	0.250953414461967	0.993106697966735	HTRA3	cg13131263	441	3.73710066485967	0.218984108410478	0.943948568836907	DDC	cg17015994	441	1.22537088787207	0.192694412134154	0.844209685910916	HTRA1	cg24870096	441	0.858091623790806	0.232027072814998	0.96942796809055	PRKAR1A	cg14558428	441	0.284371787424983	0.215060276938793	0.916984843585253	CRH
cg24433738	441	1.17260527419618	0.244359515231192	0.98821050722751	CRHR1	cg26969596	441	0.452747403662464	0.24078886866968	0.990927793603041	COMT	cg10207656	441	1.16955279746409	0.256235309972897	0.993106697966735	FKBP5	cg01220564	441	0.904998861909687	0.220159217055574	0.943948568836907	H6PD	cg04554613	441	1.69346902861266	0.192700037001405	0.844209685910916	HTRA3	cg13527387	441	0.693269458329749	0.234152530710811	0.96942796809055	CRHR2	cg04490037	441	0.771345350914981	0.215490535887318	0.916984843585253	DRD3
cg08447739	441	-0.611781522659855	0.244780969880475	0.98821050722751	HTR4	cg04111177	441	-4.08092170745103	0.241182396240562	0.990927793603041	SRD5A2	cg11438011	441	0.263671649264672	0.261596838926334	0.993106697966735	CRHR2	cg08573687	441	0.296089074548286	0.221699978646587	0.943948568836907	SRD5A1	cg24425171	441	2.53907205543174	0.196117885640343	0.850444724012854	CRHR1	cg15888097	441	0.569063891251572	0.235168710036526	0.96942796809055	HTR7	cg00930194	441	0.636578135048335	0.215835704384734	0.916984843585253	TBX19
cg25114611	441	0.734474500768189	0.251623798896366	0.98821050722751	SLC6A4	cg10025865	441	0.37576497893635	0.241647919724836	0.990927793603041	HTR1E	cg14847514	441	-0.899561788794008	0.264192785076249	0.993106697966735	HTRA1	cg18068537	441	0.948447407687546	0.22171285165492	0.943948568836907	DRD2	cg25924472	441	0.449116943374563	0.199846855745691	0.850444724012854	MC4R	cg10953410	441	0.446308503872933	0.240330539496907	0.96942796809055	HTR5A	cg20387815	441	-2.52142310680505	0.216800891147174	0.916984843585253	AVPR1A
cg04732193	441	-0.540594266190652	0.25172775780568	0.98821050722751	HTRA3	cg13450708	441	-0.522109210309038	0.243355309071424	0.990927793603041	DDC	cg25103337	441	0.698493329595768	0.264447141600753	0.993106697966735	ACE	cg06778429	441	5.08761026660072	0.222366574429792	0.943948568836907	NR3C1	cg17647537	441	-0.594046519266869	0.200399293987376	0.850444724012854	TH	cg10205430	441	-1.29677074337024	0.241139385781357	0.96942796809055	FKBP5	cg23851685	441	-0.695921322130825	0.217001541918651	0.916984843585253	PRKAR1A
cg13996731	441	-2.84173960721865	0.252505515024146	0.98821050722751	CRHR2	cg13069918	441	-0.793125761808428	0.246039449092945	0.990927793603041	DDC	cg02261408	441	-0.6477400288413	0.264938156758957	0.993106697966735	SRD5A2	cg02955911	441	-1.85161044572087	0.223694773589797	0.943948568836907	POMC	cg02711929	441	1.13164796556823	0.200795885178229	0.850444724012854	SRD5A2	cg10588377	441	0.916124071400447	0.242354572240427	0.96942796809055	HTR1E	cg24718866	441	-1.7966451411195	0.217274071966143	0.916984843585253	PRKAR1A
cg02757179	441	-0.38780142038917	0.252511281226283	0.98821050722751	POMC	cg06836480	441	0.759548909437461	0.247811270675687	0.990927793603041	NR3C1	cg15607306	441	0.540935237060155	0.26505534420286	0.993106697966735	HTRA1	cg00712943	441	0.329656401479802	0.223733876255907	0.943948568836907	HTR6	cg04111177	441	-6.34118438227389	0.203881872079677	0.850444724012854	SRD5A2	cg26132809	441	-2.04449677209918	0.242649050900199	0.96942796809055	AVP	cg18954700	441	-7.00515871715355	0.218443291725652	0.916984843585253	DRD2
cg02937158	441	-0.520308662643603	0.254098305347047	0.98821050722751	POMC	cg22701672	441	2.02371281960334	0.248324363651482	0.990927793603041	HSD11B2	cg21644468	441	0.623448648609272	0.265569903360478	0.993106697966735	SERPINA6	cg07778819	441	0.321297840352675	0.224243256800753	0.943948568836907	DRD1	cg19014730	441	1.15923026735114	0.204114173780052	0.850444724012854	DRD2	cg25836061	441	2.11897453816305	0.245049484079758	0.96942796809055	MC4R	cg08789908	441	4.35341066450872	0.219035486030697	0.916984843585253	NR3C1
cg00078348	441	0.37809287329183	0.254199057663069	0.98821050722751	TBX19	cg18421538	441	0.91530278459735	0.250273342753717	0.990927793603041	TH	cg22442841	441	1.14611614931341	0.267159540491289	0.993106697966735	CYP11A1	cg27208536	441	-0.571569733985703	0.2260217147237	0.943948568836907	COMT	cg09277575	441	0.664896806262291	0.204135390838064	0.850444724012854	HTR1E	cg24922596	441	-0.735471244295907	0.245674985259152	0.96942796809055	ACE	cg12017635	441	0.787879642152243	0.22037898524506	0.916984843585253	DDC
cg25394652	441	2.91792495118962	0.257193432481693	0.98821050722751	CRHR1	cg23335356	441	-0.447443150669921	0.252342683717933	0.990927793603041	ACE	cg21657705	441	-0.609065636981443	0.269112612964257	0.993106697966735	SERPINA6	cg08636224	441	2.54117610686739	0.226960311532554	0.943948568836907	SRD5A1	cg04768425	441	0.853914347988353	0.20601706611149	0.850444724012854	NR3C2	cg18865272	441	-3.03465592626475	0.247329033309565	0.96942796809055	DRD2	cg24118521	441	-1.08374299296804	0.223515154756862	0.916984843585253	CRHR1
cg24877195	441	-2.04986740172236	0.257485113606737	0.98821050722751	ACE	cg09208611	441	0.360212049269967	0.255044289772767	0.990927793603041	FKBP5	cg00852398	441	0.618562738156428	0.27368827611691	0.993106697966735	HTR6	cg10300814	441	-1.85142060589251	0.22709290909542	0.943948568836907	FKBP5	cg07579946	441	1.72207090658833	0.210596709057435	0.850444724012854	NR3C1	cg10216820	441	-1.34554131730853	0.24966932056216	0.96942796809055	FKBP5	cg18726036	441	-1.77246805757959	0.224950030847617	0.916984843585253	DRD2
cg11765362	441	-0.207642518730849	0.259064545975153	0.98821050722751	AKR1D1	cg04856117	441	1.17567839376298	0.257407245129456	0.990927793603041	NR3C2	cg00615746	441	0.40801273703716	0.27601807221207	0.993106697966735	HSD11B1	cg04199779	441	3.72081556217144	0.229979272816502	0.943948568836907	DRD3	cg09926649	441	-1.71960299305453	0.211086960410873	0.850444724012854	HTR1E	cg16545496	441	-1.81707569439679	0.251754710002077	0.96942796809055	HTRA1	cg20753294	441	-1.81803336099079	0.224995734719041	0.916984843585253	HTR2A
cg04111177	441	-2.87058308513719	0.259098605552861	0.98821050722751	SRD5A2	cg09318122	441	0.419403380766464	0.258568786039221	0.990927793603041	FKBP5	cg18068240	441	5.31925706985551	0.278390774246967	0.993106697966735	TH	cg06961323	441	-0.559184855517222	0.23020975070006	0.943948568836907	PROP1	cg10045137	441	-3.30603206176597	0.211463715077902	0.850444724012854	FKBP5	cg08215831	441	-0.633153405968053	0.255725240668498	0.96942796809055	NR3C1	cg02712145	441	1.06207135456997	0.225273268825371	0.916984843585253	SRD5A2
cg12583095	441	-1.56242517274129	0.260625931911985	0.98821050722751	LEP	cg00242031	441	0.556931654906459	0.259039316868556	0.990927793603041	H6PD	cg18847882	441	1.48621300389812	0.278886442007704	0.993106697966735	DRD2	cg22900229	441	2.86334309797614	0.230856986943809	0.943948568836907	HSD11B2	cg00930194	441	0.783592630395809	0.214949027479284	0.850444724012854	TBX19	cg27090784	441	-2.56272166959309	0.257194887806735	0.96942796809055	COMT	cg08700190	441	0.753811393217188	0.225296998972932	0.916984843585253	PROP1
cg25150846	441	0.357865283585425	0.263408116888846	0.98821050722751	SLC6A4	cg24394631	441	0.418472535443421	0.261597863910643	0.990927793603041	SLC6A4	cg14199144	441	0.512035868391067	0.279611473502712	0.993106697966735	DDC	cg12807275	441	-0.504430496529064	0.240011235319458	0.974680285389312	DDC	cg27569822	441	7.10691514161147	0.218444712053039	0.850444724012854	COMT	cg06943371	441	6.30996655345035	0.260039700503862	0.96942796809055	SRD5A1	cg00701951	441	1.13113477580189	0.225508500936047	0.916984843585253	HSD11B1
cg16332610	441	-1.90903398641689	0.264728236179932	0.98821050722751	HTR7	cg07806248	441	-0.381746066511579	0.261841179513751	0.990927793603041	NR3C1	cg06457577	441	-2.30098042322021	0.280014137797221	0.993106697966735	DRD1	cg15347662	441	-1.27336341294362	0.241093706970389	0.974680285389312	HTRA1	cg08447739	441	-1.25012891368274	0.221023834643825	0.850444724012854	HTR4	cg15645634	441	-6.61792154866227	0.261833022961273	0.96942796809055	HTR7	cg21905167	441	1.66018048094626	0.227377691612295	0.919505390256312	CYP11A1
cg02965092	441	0.360127727515612	0.264894135397071	0.98821050722751	POMC	cg25054907	441	-3.52934954577111	0.262723292978528	0.990927793603041	CRHR1	cg02322203	441	-1.21194653773135	0.280650560155787	0.993106697966735	POMC	cg04204669	441	0.605234299779442	0.242844054336052	0.974680285389312	DRD3	cg10741760	441	0.5412318637602	0.223222506289916	0.850444724012854	LEP	cg03056854	441	-0.951721933332452	0.261972054163197	0.96942796809055	HTR2B	cg21878188	441	5.94572391481629	0.229451725246691	0.921911754686273	CYP11A1
cg01714756	441	0.494289158317133	0.268421715885323	0.98821050722751	H6PD	cg12639324	441	-3.14905913606065	0.262863188293728	0.990927793603041	DDC	cg21960184	441	0.340121978714836	0.284143694712998	0.993106697966735	CYP11A1	cg00025823	441	0.440505507650359	0.243670071347328	0.974680285389312	H6PD	cg09025327	441	2.02804195523195	0.223894546024564	0.850444724012854	FKBP5	cg00308665	441	0.669151544454909	0.265180107911111	0.96942796809055	H6PD	cg27304079	441	-4.73797355228643	0.230477938671568	0.921911754686273	COMT
cg13499155	441	0.339984879776376	0.268923786427583	0.98821050722751	HTR5A	cg18785742	441	-2.01483415154838	0.265036342340731	0.990927793603041	DRD2	cg04199779	441	3.75988311745439	0.28562733843777	0.993106697966735	DRD3	cg18023598	441	1.28073732317992	0.249186011259681	0.986793183729251	TH	cg26656751	441	-1.29895789396369	0.22391966993848	0.850444724012854	COMT	cg08258978	441	0.994141374525159	0.266460174169912	0.96942796809055	PROP1	cg00293936	441	2.87164053055691	0.233941386385615	0.929737112149839	HTR6
cg01718447	441	0.529853280641281	0.278352608502881	0.98821050722751	H6PD	cg21713424	441	4.47165666060929	0.267133506721749	0.990927793603041	CYP11A1	cg06828613	441	-0.471553714894252	0.286885825313578	0.993106697966735	NR3C1	cg05885577	441	-0.491600822072947	0.249379799148968	0.986793183729251	HTRA3	cg04199256	441	1.90946643172447	0.223981766909215	0.850444724012854	DRD3	cg19285508	441	-2.60074904386032	0.266632828981026	0.96942796809055	DRD2	cg12728623	441	2.40057095290781	0.234960737581345	0.929737112149839	LEP
cg18865272	441	-1.40745296076116	0.279078805849374	0.98821050722751	DRD2	cg11750900	441	2.22450937642371	0.270031040044752	0.990927793603041	DDC	cg20073007	441	1.01296506690536	0.292839500837979	0.993106697966735	TPH2	cg02276314	441	0.839147992119889	0.256316980387171	0.990877270468319	DHRS9	cg22458194	441	4.78913029662397	0.225123357808371	0.850444724012854	CYP11A1	cg13131263	441	-4.94126607966646	0.267647249344866	0.96942796809055	DDC	cg25730237	441	1.4904059924712	0.237317102398759	0.930002922761058	MC4R
cg27345592	441	-0.812114977198982	0.279215441197391	0.98821050722751	COMT	cg02040921	441	2.61879528809958	0.271910535522418	0.990927793603041	TBX19	cg17723156	441	0.648042967868902	0.293771693205154	0.993106697966735	TH	cg06943371	441	3.56277787429283	0.256755338075838	0.990877270468319	SRD5A1	cg00454577	441	3.19071137730757	0.22540904159809	0.850444724012854	TBX19	cg06531741	441	-0.773158022730485	0.269418396746387	0.96942796809055	NR3C1	cg23335356	441	-0.535041155654924	0.237555094400922	0.930002922761058	ACE
cg15572496	441	0.5710556284447	0.280725332692496	0.98821050722751	CYP17A1	cg20813374	441	0.835903183637685	0.272715529449322	0.990927793603041	HTR2A	cg17015994	441	0.669175212529511	0.294487678438379	0.993106697966735	HTRA1	cg13857519	441	0.476353883133484	0.257611078475394	0.990877270468319	HTR5A	cg05454635	441	2.15403962934468	0.225895396328086	0.850444724012854	HTRA3	cg26558919	441	-6.36218758546717	0.273126291572751	0.96942796809055	COMT	cg19502744	441	0.304317679561601	0.239252666601203	0.931016449222356	DRD2
cg13373360	441	0.889149680811026	0.281890153374343	0.98821050722751	AKR1D1	cg14402224	441	0.928495193639634	0.273911761436495	0.990927793603041	CRH	cg00365524	441	0.584288675817144	0.295503446734663	0.993106697966735	HTR6	cg16844661	441	0.63304396761196	0.264256705288062	0.990877270468319	HTRA1	cg13094036	441	0.980412970132524	0.227739117697958	0.850444724012854	LEP	cg22549881	441	0.335745752596913	0.273455729386297	0.96942796809055	HSD11B2	cg24922596	441	-0.5760307260618	0.240343920315554	0.931016449222356	ACE
cg04471890	441	-1.62706714345664	0.28602811177717	0.98821050722751	DRD3	cg21919834	441	1.09210111309087	0.274109028059584	0.990927793603041	CYP11A1	cg23764129	441	0.842900816767276	0.299093930394378	0.993106697966735	PRKAR1A	cg24877195	441	-2.32820945558143	0.265203355837867	0.990877270468319	ACE	cg10588377	441	0.904958331621409	0.228484868820284	0.850444724012854	HTR1E	cg09553346	441	5.07584073843673	0.27627286883407	0.96942796809055	HTR1E	cg18421538	441	1.07711731183702	0.242769333146322	0.932713725500432	TH
cg05426956	441	0.719390497627566	0.287095788327643	0.98821050722751	NR3C2	cg05141787	441	0.722763130814305	0.276379955801021	0.990927793603041	HTRA3	cg06623827	441	0.499283709880717	0.300445841857854	0.993106697966735	HTR4	cg20753294	441	-1.16774192053963	0.27313475407469	0.990877270468319	HTR2A	cg24026230	441	0.353705391624662	0.230739738255859	0.850444724012854	PRKAR1A	cg21577406	441	-1.29006599549829	0.277360573507821	0.96942796809055	SERPINA6	cg23974739	441	0.777848890741463	0.243560384319987	0.932713725500432	ACE
cg00454577	441	1.48673109682417	0.291033130567785	0.98821050722751	TBX19	cg15926585	441	0.575481787682433	0.276909404027755	0.990927793603041	CYP17A1	cg21286526	441	1.56814869521581	0.300899807722424	0.993106697966735	HTR2A	cg27090784	441	1.35188490654178	0.279628068894799	0.990877270468319	COMT	cg26332534	441	-6.26368740357815	0.230852357515526	0.850444724012854	AVP	cg14791547	441	4.26275688663007	0.279063100877074	0.96942796809055	CYP11B1	cg06751221	441	-2.39127820876713	0.247843310249879	0.932713725500432	HTR4
cg06045576	441	0.518814621347063	0.291397325845391	0.98821050722751	HTRA3	cg14170547	441	0.691713727975947	0.276972249363009	0.990927793603041	LEP	cg17736230	441	1.80068917870168	0.301055276415442	0.993106697966735	TH	cg10538202	441	-0.397757436734522	0.28747947122754	0.990877270468319	HTR1E	cg25535999	441	1.20408633269832	0.230996622248976	0.850444724012854	SLC6A4	cg07863439	441	3.24891186249063	0.279095254482767	0.96942796809055	NR3C1	cg13131263	441	-4.17895540626584	0.247860642761558	0.932713725500432	DDC
cg26532621	441	0.493156999555739	0.292023281569111	0.98821050722751	AVP	cg22549881	441	-0.217805834752504	0.278060693518889	0.990927793603041	HSD11B2	cg25940513	441	-0.832104700562482	0.304574807761069	0.993106697966735	MC2R	cg11202160	441	-0.522743960509216	0.288307245562633	0.990877270468319	CRHR2	cg01714756	441	1.04065070881459	0.2326196409431	0.850444724012854	H6PD	cg12017635	441	0.884909118886604	0.28245282064812	0.96942796809055	DDC	cg26464934	441	0.663983229281882	0.250899847114898	0.932713725500432	AVP
cg08700190	441	0.414743704333612	0.292561731608874	0.98821050722751	PROP1	cg13748928	441	1.85619696385803	0.27923432595273	0.990927793603041	DDC	cg05885577	441	-0.494318186459665	0.306386077907215	0.993106697966735	HTRA3	cg05624376	441	-0.620188377824214	0.288628806528021	0.990877270468319	NR3C2	cg25103337	441	1.12079460986304	0.233748611267783	0.850444724012854	ACE	cg00712943	441	0.516791152020281	0.28295017000062	0.96942796809055	HTR6	cg18019515	441	7.73613214356292	0.251731219889115	0.932713725500432	TPH1
cg13069918	441	0.515142563148491	0.296959736723223	0.98821050722751	DDC	cg08845721	441	0.800672404551786	0.280938971951626	0.990927793603041	PROP1	cg06947205	441	-2.40466548090003	0.307609360000905	0.993106697966735	NR3C1	cg21644468	441	0.517934773936661	0.288712285865905	0.990877270468319	SERPINA6	cg12577105	441	5.21375256086599	0.233847266131801	0.850444724012854	DDC	cg00140191	441	4.61250992378633	0.283110766740931	0.96942796809055	HTR6	cg24105933	441	2.27456702219137	0.251971634134297	0.932713725500432	SLC6A4
cg25054907	441	-2.40725431798688	0.297131387531694	0.98821050722751	CRHR1	cg08894761	441	-0.228391401614022	0.282756719763331	0.990927793603041	DRD1	cg12367389	441	0.652935273230421	0.3076404400658	0.993106697966735	DDC	cg24870096	441	0.427812802269603	0.290410950817053	0.990877270468319	PRKAR1A	cg13381984	441	0.569863841267307	0.235193317659507	0.850444724012854	HTR5A	cg12516059	441	0.318605881837764	0.283859432045427	0.96942796809055	HTR5A	cg17085721	441	-4.20523319665215	0.253303395403127	0.932713725500432	HTRA1
cg09553346	441	2.34710629972425	0.300668301438432	0.98821050722751	HTR1E	cg22614355	441	-1.73049213172584	0.28357550284055	0.990927793603041	HSD11B2	cg13245440	441	0.413281038013046	0.307863988891204	0.993106697966735	DDC	cg10025865	441	0.281779220392867	0.291996914090754	0.990877270468319	HTR1E	cg19500607	441	0.746455510807266	0.235903789755693	0.850444724012854	TH	cg02187522	441	-3.22003623538159	0.284735760288426	0.96942796809055	HTR6	cg19530293	441	-0.45989075304946	0.254752797274546	0.932713725500432	TH
cg10097150	441	0.256269218701148	0.303666791899842	0.98821050722751	FKBP5	cg27640254	441	-0.765565824904572	0.284790987796223	0.990927793603041	COMT	cg19194405	441	-0.958528903909879	0.311239606731066	0.993106697966735	TH	cg18845001	441	-0.27900115283046	0.295269773775529	0.990877270468319	HTR3A	cg20007462	441	4.82091331455911	0.236204962052852	0.850444724012854	AVPR1A	cg20016411	441	0.529647955945281	0.287369629841459	0.96942796809055	AVPR1A	cg16012111	441	-4.14666295795643	0.255655076798963	0.932713725500432	HTRA1
cg24862443	441	-1.41998071394403	0.305928389569282	0.98821050722751	ACE	cg07425204	441	0.854934531757812	0.286024813606204	0.990927793603041	HTR4	cg22059812	441	2.57909590330081	0.313940736895505	0.993106697966735	CYP11A1	cg07464571	441	-0.458503839659506	0.299909867274355	0.990877270468319	HTR4	cg11202160	441	-1.01346866661572	0.238769657884176	0.850444724012854	CRHR2	cg17524078	441	-0.524736855090246	0.287415526160103	0.96942796809055	HTR3A	cg18948125	441	0.368414563221177	0.255857487640172	0.932713725500432	TH
cg04554613	441	0.684981486468634	0.306195440738896	0.98821050722751	HTRA3	cg20647137	441	0.462179995629005	0.287597097216339	0.990927793603041	TPH2	cg18147569	441	3.33128602241162	0.316332857138852	0.993106697966735	DRD2	cg26558919	441	3.21286413833066	0.300052593490648	0.990877270468319	COMT	cg01049782	441	-1.03225510431587	0.240644987817144	0.850444724012854	HSD11B1	cg21661983	441	1.06707061537275	0.287460670834647	0.96942796809055	SERPINA6	cg21683009	441	-6.27354060498045	0.256154775510148	0.932713725500432	SERPINA6
cg00698685	441	0.986615707388266	0.306594283202272	0.98821050722751	HTR6	cg00698685	441	1.38887982733895	0.287599388744127	0.990927793603041	HTR6	cg23335356	441	-0.37037955333528	0.316634481276636	0.993106697966735	ACE	cg21881537	441	-0.978952619745763	0.301319796550176	0.990877270468319	CYP11A1	cg06417522	441	5.83418919457133	0.242138712220608	0.850444724012854	NR3C1	cg17095936	441	0.523543519894591	0.287897354991769	0.96942796809055	HTR7	cg13373360	441	1.48324023784102	0.258498969746123	0.932713725500432	AKR1D1
cg09495977	441	1.93309630289475	0.307011928411492	0.98821050722751	FKBP5	cg08789908	441	3.18787592702756	0.287686270326545	0.990927793603041	NR3C1	cg10185667	441	-2.21851478325895	0.318380212517439	0.993106697966735	HTR1E	cg25054907	441	-2.70948323525077	0.302584871607786	0.990877270468319	CRHR1	cg01718447	441	1.0823397205865	0.242421506158133	0.850444724012854	H6PD	cg11491381	441	-4.70998963318384	0.289186048557748	0.96942796809055	AKR1D1	cg24026230	441	0.271606644767939	0.260755546231899	0.932713725500432	PRKAR1A
cg06149357	441	0.212003604209786	0.309716937241189	0.98821050722751	HTRA3	cg23524341	441	2.36847495128258	0.288138897231759	0.990927793603041	ACE	cg15600279	441	-0.44593269441771	0.318554501322937	0.993106697966735	HTRA1	cg02937158	441	-0.53653519625281	0.303176861712883	0.990877270468319	POMC	cg02965092	441	0.74055628142152	0.242931654703237	0.850444724012854	POMC	cg25924472	441	-0.387988675007492	0.293621469190945	0.96942796809055	MC4R	cg18534039	441	0.492242634649465	0.260930734207322	0.932713725500432	TH
cg10323433	441	-0.311559988501669	0.310780324607851	0.98821050722751	FKBP5	cg18757974	441	2.19652022272723	0.288538815535518	0.990927793603041	DRD2	cg05506829	441	1.74319495668686	0.320602720454022	0.993106697966735	HTRA3	cg12761518	441	0.665359469429533	0.306064942214694	0.990877270468319	DDC	cg20941184	441	-0.952225495265769	0.245365258130604	0.850444724012854	HTR2A	cg04360210	441	-1.28311266640012	0.294470850473274	0.96942796809055	DRD3	cg17220584	441	-0.523032745046777	0.262549135579552	0.932713725500432	HTR3A
cg00615746	441	0.290646751752759	0.311294634622221	0.98821050722751	HSD11B1	cg24134767	441	0.61745065097049	0.294781649000972	0.990927793603041	CRHR1	cg05437692	441	0.724339974525986	0.321368231029472	0.993106697966735	NR3C2	cg24118521	441	-0.645899627478433	0.308753990327949	0.990877270468319	CRHR1	cg26966083	441	0.82054740040776	0.246280912972952	0.850444724012854	COMT	cg09576143	441	-1.05739776758263	0.296451813361112	0.96942796809055	FKBP5	cg01335087	441	-1.24871201554782	0.262608293238453	0.932713725500432	H6PD
cg21240762	441	-3.39634283670167	0.312377663201535	0.98821050722751	HTR2A	cg17790333	441	0.710136866197392	0.295082560742973	0.990927793603041	HTR3B	cg19457823	441	-0.496465979029648	0.32229348909517	0.993106697966735	TH	cg14809166	441	-0.44142265530928	0.309566082669872	0.990877270468319	CRH	cg02757179	441	0.793814599343297	0.247321439103745	0.850444724012854	POMC	cg01220564	441	1.38361060925927	0.298331201216651	0.96942796809055	H6PD	cg08894761	441	0.283356467725795	0.263593009380557	0.932713725500432	DRD1
cg04566694	441	-0.565244977836146	0.314595196930962	0.98821050722751	HTRA3	cg07194846	441	0.608031882270919	0.295360545736334	0.990927793603041	SRD5A1	cg21713424	441	3.84982067786078	0.323142791352824	0.993106697966735	CYP11A1	cg09318122	441	0.310336860239706	0.315687545665616	0.990877270468319	FKBP5	cg13499155	441	0.698613126702898	0.248576847842365	0.850444724012854	HTR5A	cg13748928	441	2.72886153779282	0.298891701465699	0.96942796809055	DDC	cg22458194	441	3.55774099554643	0.267444725825414	0.941466567010097	CYP11A1
cg08586216	441	-3.57153340092308	0.315093127489531	0.98821050722751	NR3C1	cg10901968	441	4.17677548621067	0.296534045103737	0.990927793603041	DDC	cg11514288	441	0.751461405660275	0.327270921407621	0.993106697966735	DDC	cg05939495	441	0.763850019027957	0.321978363984794	0.990877270468319	NR3C2	cg12580770	441	0.404259986709482	0.249613941250586	0.850444724012854	DDC	cg17426905	441	0.980255736419509	0.299476693568288	0.96942796809055	TH	cg23764129	441	-1.11104118912306	0.268904467731667	0.941466567010097	PRKAR1A
cg00930194	441	0.329708249452796	0.31660134556772	0.98821050722751	TBX19	cg03084214	441	-0.455456209252134	0.299793880746747	0.990927793603041	POMC	cg11298960	441	0.574057550414697	0.327451030329206	0.993106697966735	DDC	cg25114611	441	0.72122422019312	0.327389752367668	0.990877270468319	SLC6A4	cg23881368	441	-0.928205967059714	0.250182171625343	0.850444724012854	CRHR1	cg10913456	441	-8.17195481213161	0.300751126411031	0.96942796809055	CRHR2	cg11202160	441	-0.759787744697987	0.270284782651414	0.941466567010097	CRHR2
cg01614101	441	-0.240466540129607	0.316639828752635	0.98821050722751	H6PD	cg09147827	441	0.30647000322333	0.301349519013786	0.990927793603041	FKBP5	cg04735509	441	0.391515936238716	0.330486679318072	0.993106697966735	NR3C2	cg09208611	441	0.258221562378836	0.327531606381193	0.990877270468319	FKBP5	cg09394608	441	-1.1959223574649	0.252341731595723	0.850444724012854	FKBP5	cg02079741	441	-0.919238298244598	0.301815705433242	0.96942796809055	HSD11B1	cg02236913	441	0.40504343151555	0.271728836675922	0.941466567010097	POMC
cg08560888	441	0.388710458213399	0.316800034228255	0.98821050722751	NR3C1	cg04443360	441	0.483262171958325	0.301481017576415	0.990927793603041	HTR3C	cg01845356	441	0.500676761777482	0.33401423297887	0.993106697966735	H6PD	cg04967039	441	-0.319727658808778	0.328472294596216	0.990877270468319	NR3C2	cg06968181	441	1.76287968903331	0.253888458929027	0.850444724012854	PROP1	cg13521908	441	-3.5982955980057	0.30307654418994	0.96942796809055	DDC	cg17736230	441	-2.31855351750159	0.273106826592266	0.941466567010097	TH
cg26741280	441	1.32682910236931	0.318700070858984	0.98821050722751	COMT	cg14734794	441	0.381566937839876	0.301870170680657	0.990927793603041	CRH	cg12248358	441	0.511368608013208	0.334613510817443	0.993106697966735	HTR5A	cg16811558	441	1.03687445659126	0.331051672044044	0.990877270468319	HTRA1	cg09297468	441	0.539634187859844	0.254328658876834	0.850444724012854	HTR1E	cg12728623	441	2.66008184447344	0.30725099077273	0.96942796809055	LEP	cg10300814	441	-2.33187934032471	0.273741637690436	0.941466567010097	FKBP5
cg17114375	441	-1.63202728612855	0.318766959739692	0.98821050722751	HTRA1	cg04199779	441	3.82585489856715	0.306259926113215	0.990927793603041	DRD3	cg04856117	441	-0.954628699381259	0.335984324911767	0.993106697966735	NR3C2	cg21141047	441	2.21477737336735	0.333186223833594	0.990877270468319	HTR2A	cg01294490	441	2.62027992652287	0.256472264806899	0.850444724012854	H6PD	cg14357535	441	1.46108352346815	0.311417227976767	0.96942796809055	CYP11B1	cg08473090	441	-1.34852491105417	0.276739063654012	0.943873415045052	NR3C1
cg09623773	441	0.305657192970539	0.320076894640605	0.98821050722751	FKBP5	cg04360210	441	0.832354404743541	0.308096856593091	0.990927793603041	DRD3	cg07102705	441	0.300649640989007	0.339347438014421	0.993106697966735	HTR4	cg04111177	441	-2.80027142283907	0.333186913202058	0.990877270468319	SRD5A2	cg11298960	441	0.977464607199871	0.258210488909086	0.850444724012854	DDC	cg16335926	441	3.30196323124504	0.312519739909287	0.96942796809055	HTRA1	cg25736198	441	1.70611611349889	0.277404690751942	0.943873415045052	MC2R
cg15600279	441	-0.344186838391587	0.320500314821239	0.98821050722751	HTRA1	cg13947929	441	0.699711554976313	0.309499419059186	0.990927793603041	DDC	cg05426956	441	-0.856976240492462	0.341572034636161	0.993106697966735	NR3C2	cg22546130	441	0.76535018093762	0.33351441722057	0.990877270468319	HSD11B2	cg03279206	441	0.836783638139947	0.25871261917193	0.850444724012854	SRD5A2	cg13232821	441	1.03923334895423	0.313081241836787	0.96942796809055	LEP	cg23809645	441	-0.659997980360115	0.279133154562491	0.943873415045052	SLC6A4
cg04768425	441	0.342593692891029	0.323665298925382	0.98821050722751	NR3C2	cg08573687	441	0.294255529985799	0.312809415350482	0.990927793603041	SRD5A1	cg26466234	441	1.54283535455145	0.344618354193785	0.993106697966735	AVP	cg08845721	441	0.601762634580497	0.333777367448702	0.990877270468319	PROP1	cg13521908	441	3.66280971219286	0.259583200847701	0.850444724012854	DDC	cg01620540	441	0.61147976380656	0.313177795155739	0.96942796809055	HTR6	cg00358132	441	0.965631796957323	0.281669938871962	0.943873415045052	HTR6
cg02131967	441	-3.15609267549595	0.325893701539377	0.98821050722751	HTR6	cg20073007	441	-1.01874352770426	0.314720475093181	0.990927793603041	TPH2	cg18421538	441	0.71729784302511	0.345837748335613	0.993106697966735	TH	cg00615746	441	0.315583833141899	0.335441067275675	0.990877270468319	HSD11B1	cg14774364	441	0.728741372130097	0.26005953841793	0.850444724012854	CRH	cg21298978	441	-1.27949138516582	0.314306576439951	0.96942796809055	HTR2A	cg00025823	441	-0.568117868598848	0.28189484202538	0.943873415045052	H6PD
cg00603617	441	3.14088506164173	0.32660997233616	0.98821050722751	H6PD	cg06346307	441	0.940131052406455	0.314814616400116	0.990927793603041	HTR4	cg17860381	441	-4.09825014535119	0.35006752595984	0.993106697966735	HTR3B	cg23169111	441	0.708485223635156	0.335620014967192	0.990877270468319	CRHR1	cg13450708	441	0.716512802066964	0.261752910159235	0.850444724012854	DDC	cg23329208	441	0.822179419372346	0.3145318451051	0.96942796809055	SLC6A4	cg25058023	441	-0.453764904137651	0.282136075149336	0.943873415045052	ACE
cg06952416	441	0.632579160392163	0.327872100762636	0.98821050722751	HTR4	cg20246820	441	3.2576020496349	0.317025701478887	0.990927793603041	TPH2	cg18190187	441	1.91124423320177	0.350490021807061	0.993106697966735	HTR3A	cg05506829	441	1.47430059524406	0.339067657524804	0.990877270468319	HTRA3	cg20140452	441	-3.15707264436581	0.263984720746068	0.850444724012854	TPH2	cg11150353	441	3.39197961479182	0.314569304509882	0.96942796809055	DDC	cg15403517	441	0.214794025622404	0.284676148509366	0.944953479767256	HTRA1
cg05506829	441	1.32360795562424	0.328460211225904	0.98821050722751	HTRA3	cg19530293	441	0.349680601253967	0.31962318429447	0.990927793603041	TH	cg15971888	441	1.64357861620006	0.353936620845745	0.993106697966735	HTRA1	cg00562879	441	2.10620567631837	0.342315369424599	0.990877270468319	H6PD	cg16545496	441	1.58916801584546	0.265051385043166	0.850444724012854	HTRA1	cg00840332	441	-0.43704289540522	0.315419334774163	0.96942796809055	H6PD	cg11469319	441	2.57879782246073	0.285831918344389	0.944953479767256	CRHR2
cg16335926	441	1.55071734114256	0.330623377973316	0.98821050722751	HTRA1	cg12598837	441	1.24101481048816	0.320887377667924	0.990927793603041	DDC	cg06669759	441	-0.817607806102245	0.356147395764838	0.993106697966735	NR3C1	cg17723156	441	0.512050622877435	0.343190139733829	0.990877270468319	TH	cg03176729	441	0.741239101132895	0.265248992533496	0.850444724012854	SRD5A2	cg04484523	441	-1.15363279739789	0.317243344323515	0.96942796809055	HTR3C	cg24525872	441	-6.88029753088524	0.286972123757481	0.944953479767256	CRHR1
cg00562879	441	1.88402121094497	0.330645808493981	0.98821050722751	H6PD	cg04856689	441	-1.35115149163729	0.322832036983449	0.990927793603041	NR3C2	cg05912121	441	0.379248123676706	0.359602152434909	0.993106697966735	NR3C2	cg20709110	441	-0.467495368835589	0.345690511281451	0.990877270468319	HTR2A	cg18068537	441	1.47073363772475	0.265278853562906	0.850444724012854	DRD2	cg25121146	441	0.373917662292749	0.317368239848235	0.96942796809055	PRKAR1A	cg21577406	441	-0.988410502779667	0.287594537320469	0.944953479767256	SERPINA6
cg10686375	441	-3.32201012383119	0.33097111104217	0.98821050722751	HTR1E	cg05624376	441	-0.686301853854809	0.323497091009897	0.990927793603041	NR3C2	cg21901156	441	0.459770080459657	0.362893779957476	0.993106697966735	CYP11A1	cg23085912	441	0.3178020525822	0.347507150788441	0.990877270468319	HSD11B2	cg18233497	441	0.367345010448657	0.266294195371637	0.850444724012854	TPH1	cg21905167	441	1.78583855369642	0.317584976214152	0.96942796809055	CYP11A1	cg15645634	441	-4.83325551682589	0.291619083005761	0.945327587700842	HTR7
cg22442841	441	0.775897540937847	0.333567398765723	0.98821050722751	CYP11A1	cg21796427	441	1.37616135001179	0.324882154134374	0.990927793603041	CYP11A1	cg19502744	441	-0.187838307768337	0.363643009701184	0.993106697966735	DRD2	cg08586216	441	-3.80116767852613	0.347739372030581	0.990877270468319	NR3C1	cg03570920	441	0.349435177296688	0.26659732387973	0.850444724012854	SRD5A2	cg25284492	441	-3.61886114742817	0.319059895704872	0.96942796809055	CRHR1	cg20140452	441	-2.40204354398741	0.292078562142983	0.945327587700842	TPH2
cg13947929	441	0.486297964430144	0.334527519545071	0.98821050722751	DDC	cg01459748	441	0.702741111173406	0.325769407008468	0.990927793603041	HTR6	cg10335743	441	-0.556761626873994	0.364051784391646	0.993106697966735	FKBP5	cg21919834	441	0.778388653028231	0.348518570357863	0.990877270468319	CYP11A1	cg05624376	441	1.11655953309375	0.267512322331527	0.850444724012854	NR3C2	cg01145353	441	-1.78618129523589	0.32020028872526	0.96942796809055	TBX19	cg12580770	441	0.299561820445253	0.293909410745459	0.945327587700842	DDC
cg14791547	441	1.91195015371391	0.335390263392282	0.98821050722751	CYP11B1	cg13251292	441	0.361135645765334	0.326339434338959	0.990927793603041	DDC	cg10288772	441	2.02587074198053	0.369693534459379	0.993106697966735	FKBP5	cg01516872	441	0.532552387768326	0.349447478193028	0.990877270468319	HSD11B1	cg03857453	441	-5.63937058084625	0.267526812782489	0.850444724012854	POMC	cg20967585	441	-0.445066265889544	0.321085442025448	0.96942796809055	HTR2A	cg06149357	441	0.344226373635875	0.294245610688642	0.945327587700842	HTRA3
cg01489398	441	-0.438837631511611	0.337325019162064	0.98821050722751	TBX19	cg20804163	441	-1.67785884968535	0.327440560017629	0.990927793603041	HTR2A	cg16536918	441	-1.40704932088272	0.370140569041437	0.993106697966735	HTRA1	cg04566694	441	-0.595361201245441	0.350761493017343	0.990877270468319	HTRA3	cg06669759	441	1.44929266026696	0.267808559689821	0.850444724012854	NR3C1	cg06836480	441	0.968690044594799	0.322535753874891	0.96942796809055	NR3C1	cg06778429	441	-6.15722079329982	0.296625444101928	0.945327587700842	NR3C1
cg09366519	441	0.352426902953928	0.338309384919385	0.98821050722751	FKBP5	cg23532924	441	0.467007911288909	0.328422071549378	0.990927793603041	ACE	cg04900872	441	0.514334845601789	0.375544234101232	0.993106697966735	HTRA3	cg25394652	441	2.72822193817362	0.351250740892843	0.990877270468319	CRHR1	cg02955911	441	2.74049481450196	0.2685918476946	0.850444724012854	POMC	cg23570923	441	-1.80139751781694	0.324259998250291	0.96942796809055	SLC6A4	cg07102705	441	0.396118307491993	0.297256832052142	0.945327587700842	HTR4
cg14149680	441	0.270973055062278	0.338498981225132	0.98821050722751	HTR5A	cg06669759	441	0.881238459298123	0.328450098875242	0.990927793603041	NR3C1	cg21881537	441	-0.959145668169966	0.376379525629955	0.993106697966735	CYP11A1	cg12715421	441	-0.461421415262166	0.352485904750593	0.990877270468319	DDC	cg18998365	441	-0.92036212112593	0.270897505072892	0.850444724012854	TH	cg23881368	441	0.850229449084741	0.326005678486916	0.96942796809055	CRHR1	cg03024742	441	0.391607436076768	0.298032927565513	0.945327587700842	SRD5A2
cg03667083	441	0.398206719470888	0.338546031086295	0.98821050722751	DHRS9	cg05885577	441	-0.503811063282461	0.329823849186792	0.990927793603041	HTRA3	cg11152298	441	-3.93150508026303	0.376428662861153	0.993106697966735	HTR5A	cg10686375	441	-3.55642798981853	0.35699326143485	0.990877270468319	HTR1E	cg24661173	441	0.669185922651898	0.273661221504678	0.850444724012854	ACE	cg14235676	441	-3.15646510139911	0.328313010447237	0.96942796809055	CRH	cg04863452	441	1.05541351493063	0.3014165351653	0.945327587700842	NR3C2
cg07778819	441	0.223483665888389	0.338650455617224	0.98821050722751	DRD1	cg02992588	441	0.474105984771193	0.333357160509558	0.990927793603041	DHRS9	cg17426905	441	-0.520304762673076	0.376481793751607	0.993106697966735	TH	cg23757489	441	0.330355966048399	0.358094759863062	0.990877270468319	ACE	cg06777002	441	4.42072022376532	0.273700576349478	0.850444724012854	PROP1	cg18019515	441	8.56711189348153	0.328969898878727	0.96942796809055	TPH1	cg27090784	441	-1.8144571916817	0.301444478236184	0.945327587700842	COMT
cg08730070	441	-1.21852313273022	0.338870611209627	0.98821050722751	SRD5A1	cg20140452	441	-1.9076218322447	0.333383084143455	0.990927793603041	TPH2	cg21330703	441	1.69576218324673	0.378065495919372	0.993106697966735	SERPINA6	cg12751005	441	0.891352905828005	0.36080447202346	0.990877270468319	DDC	cg04987827	441	-7.84493260640883	0.274018871677144	0.850444724012854	NR3C2	cg06941869	441	0.749874986444788	0.329200341174935	0.96942796809055	SRD5A1	cg08560888	441	0.638600516782496	0.302250002909091	0.945327587700842	NR3C1
cg10712173	441	-2.76786730021344	0.339289582773929	0.98821050722751	LEP	cg08730070	441	1.69127623658197	0.335003873553173	0.990927793603041	SRD5A1	cg22601917	441	0.742567040572793	0.382779380260591	0.993106697966735	HSD11B2	cg25150846	441	0.334478807421521	0.360850215098339	0.990877270468319	SLC6A4	cg05346287	441	0.926370124941747	0.275550600963575	0.850444724012854	NR3C2	cg08730070	441	-2.52037096783162	0.329225324042617	0.96942796809055	SRD5A1	cg02440279	441	-5.34326904803578	0.302980592178421	0.945327587700842	POMC
cg00140191	441	-2.03647532691242	0.340298773469167	0.98821050722751	HTR6	cg01962937	441	-2.79554904645437	0.335883639194502	0.990927793603041	H6PD	cg26532621	441	0.530146880198231	0.383389817366349	0.993106697966735	AVP	cg10901968	441	3.06773599967637	0.362323757131052	0.990877270468319	DDC	cg26033657	441	1.9184116668443	0.276672293116099	0.850444724012854	AVP	cg07806248	441	0.488552839228259	0.330384258312568	0.96942796809055	NR3C1	cg15912040	441	-1.88578054012823	0.303121346056248	0.945327587700842	HTRA1
cg26932364	441	0.586208944344979	0.34035139787346	0.98821050722751	COMT	cg08586216	441	-4.60412406846424	0.337836982051918	0.990927793603041	NR3C1	cg24257309	441	-0.783632852997812	0.384532230180852	0.993106697966735	CRHR1	cg23764129	441	0.649091429564926	0.362378685929999	0.990877270468319	PRKAR1A	cg25940513	441	1.2929123836428	0.277372591274325	0.850444724012854	MC2R	cg02322203	441	-1.72835506181464	0.333715370496908	0.96942796809055	POMC	cg08845721	441	0.892452569289228	0.306982867108398	0.949403911596301	PROP1
cg21683009	441	-3.29373461261619	0.342579987587821	0.98821050722751	SERPINA6	cg20709110	441	-0.568282984177335	0.338141309634346	0.990927793603041	HTR2A	cg20941184	441	-0.48568615215167	0.384676467063631	0.993106697966735	HTR2A	cg12793238	441	1.88020921836698	0.363540777608023	0.990877270468319	DDC	cg04471890	441	3.31920942837573	0.278423269849722	0.850444724012854	DRD3	cg14325092	441	1.04674577466277	0.334261203438362	0.96942796809055	CYP11B1	cg18529845	441	0.211074817394839	0.308852287288334	0.949403911596301	TH
cg16811558	441	0.888967560550691	0.343580878095209	0.98821050722751	HTRA1	cg01714756	441	0.584595375133203	0.338230850355852	0.990927793603041	H6PD	cg12966915	441	-3.05020494721895	0.385693571488181	0.993106697966735	LEP	cg18757974	441	1.57443179803372	0.363720916763364	0.990877270468319	DRD2	cg10205430	441	1.14131660732843	0.281997171568706	0.850444724012854	FKBP5	cg27304079	441	-4.91293872306777	0.334425093994603	0.96942796809055	COMT	cg11361387	441	-1.04754744109912	0.311111539796149	0.949403911596301	DDC
cg18595639	441	1.37595230560359	0.344020128545515	0.98821050722751	DRD2	cg01192538	441	-0.405560720504216	0.338740379013997	0.990927793603041	H6PD	cg03724721	441	-1.65251219054866	0.38660290152136	0.993106697966735	SRD5A2	cg26741280	441	1.36905296278367	0.364249019938944	0.990877270468319	COMT	cg06943371	441	5.73241044564686	0.284574619636423	0.850444724012854	SRD5A1	cg17307280	441	-4.39066973167967	0.335773165011958	0.96942796809055	HTR3A	cg03974204	441	1.34718110244981	0.314256548102626	0.949403911596301	SRD5A2
cg00365524	441	0.406906399345196	0.346378690418748	0.98821050722751	HTR6	cg19354750	441	-2.27714255627238	0.339930697285501	0.990927793603041	HTR3A	cg00629244	441	3.34445497142958	0.387021774699163	0.993106697966735	HTR6	cg19878200	441	0.35819551399633	0.364366828150065	0.990877270468319	AVPR1A	cg19878200	441	0.719484014126663	0.286059976804609	0.850444724012854	AVPR1A	cg09916783	441	-1.12145838701777	0.335897695953101	0.96942796809055	FKBP5	cg14094793	441	2.3124894459085	0.314319815808728	0.949403911596301	HTR5A
cg17875135	441	1.11444405639877	0.346568000295011	0.98821050722751	HTR3A	cg05942508	441	0.856262816874583	0.340045697153453	0.990927793603041	NR3C2	cg09863950	441	0.510112925979265	0.389996387601324	0.993106697966735	HTR1E	cg03449379	441	0.964215747326797	0.364517024109277	0.990877270468319	POMC	cg25551168	441	1.56718210879275	0.286129699883858	0.850444724012854	MC2R	cg10538202	441	-0.641651501211308	0.336167063394867	0.96942796809055	HTR1E	cg18146873	441	-3.46712780580114	0.314916592823456	0.949403911596301	TH
cg20807790	441	-0.217372064105259	0.350207397500081	0.98821050722751	HTR2A	cg10097150	441	0.320557034277783	0.341601710952781	0.990927793603041	FKBP5	cg16003049	441	-0.480642355213532	0.391581200280006	0.993106697966735	HTRA1	cg21240762	441	-3.46201352597612	0.365406763128008	0.990877270468319	HTR2A	cg14284211	441	1.72354431608507	0.286754448159503	0.850444724012854	CRH	cg15868400	441	-2.32975476622559	0.336177332692125	0.96942796809055	HTRA1	cg20016411	441	0.386092029563142	0.315016671380453	0.949403911596301	AVPR1A
cg27130954	441	0.773791728357029	0.350649996662022	0.98821050722751	COMT	cg01926269	441	-1.50088769107606	0.342172314667327	0.990927793603041	H6PD	cg00903099	441	0.307794958864731	0.395231109915917	0.993106697966735	H6PD	cg12248358	441	0.418721041989156	0.365594544872196	0.990877270468319	HTR5A	cg19285508	441	-2.43661573641722	0.287180466128663	0.850444724012854	DRD2	cg26321066	441	-0.56879417685416	0.336345711136434	0.96942796809055	AVP	cg22549881	441	0.237501201161532	0.315286585622061	0.949403911596301	HSD11B2
cg19226017	441	-0.483303733444632	0.354437585817815	0.98821050722751	HTR3A	cg24738325	441	2.64763825906115	0.342955955991845	0.990927793603041	SLC6A4	cg03691958	441	2.4201008866076	0.396792762050043	0.993106697966735	POMC	cg08894761	441	-0.161366850559389	0.366078156783281	0.990877270468319	DRD1	cg02187522	441	3.16034311520008	0.28731320060813	0.850444724012854	HTR6	cg04042861	441	-0.899998243179501	0.336947059441025	0.96942796809055	POMC	cg25011257	441	-0.944807446018833	0.316791098135204	0.949403911596301	SLC6A4
cg01516872	441	0.457431018317035	0.359356391853285	0.98821050722751	HSD11B1	cg13499155	441	0.395828512942852	0.344750404182269	0.990927793603041	HTR5A	cg09926649	441	-0.793836574638294	0.396837673507626	0.993106697966735	HTR1E	cg14714364	441	0.274912388770986	0.370775023456645	0.990877270468319	CYP11B1	cg24870096	441	0.734975712024615	0.288091757018913	0.850444724012854	PRKAR1A	cg26466234	441	-2.4138875303644	0.337075399323303	0.96942796809055	AVP	cg06968181	441	1.26896502608716	0.317327937843329	0.949403911596301	PROP1
cg19491599	441	-0.389479755437357	0.359479794219744	0.98821050722751	DRD2	cg16112129	441	0.42043797261769	0.345329542237808	0.990927793603041	HTR7	cg26135506	441	2.96212500261975	0.398503685054826	0.993106697966735	AVP	cg08479865	441	0.224455441514128	0.372085755180556	0.990877270468319	PROP1	cg13175282	441	2.01113926661498	0.28886322633844	0.850444724012854	DDC	cg09516959	441	-0.642068802738168	0.337530797791749	0.96942796809055	HTR1E	cg18773129	441	-1.84976239540855	0.324437193571591	0.955696380392164	TH
cg23549160	441	1.51795848115443	0.360386809544774	0.98821050722751	PRKAR1A	cg02577436	441	-1.61836355448208	0.348556522605956	0.990927793603041	DHRS9	cg18948125	441	-0.218768411330613	0.398892021078823	0.993106697966735	TH	cg25736198	441	1.02309199719598	0.372150813090441	0.990877270468319	MC2R	cg00603617	441	6.57022034030541	0.289200027702957	0.850444724012854	H6PD	cg02757179	441	-0.656770322147181	0.338176508834242	0.96942796809055	POMC	cg18701449	441	-0.46773835801261	0.327689674287535	0.955696380392164	DRD2
cg21141047	441	1.83019146036905	0.360778865122672	0.98821050722751	HTR2A	cg15645634	441	3.63697534157006	0.348967707934756	0.990927793603041	HTR7	cg24482024	441	0.717923551414201	0.399247282781855	0.993106697966735	CRHR1	cg07648740	441	0.66232806617418	0.372897735219865	0.990877270468319	HTR4	cg16692923	441	1.48132660534073	0.289273338821698	0.850444724012854	CYP17A1	cg00365524	441	0.847044579176048	0.338622901872003	0.96942796809055	HTR6	cg24482024	441	1.00516597285917	0.329624475983244	0.955696380392164	CRHR1
cg19457823	441	-0.361675676940285	0.361128850117467	0.98821050722751	TH	cg15572496	441	0.672763326506946	0.350018575361141	0.990927793603041	CYP17A1	cg00078348	441	0.365419922977394	0.400580353396395	0.993106697966735	TBX19	cg14791547	441	1.99727134689105	0.375127822944466	0.990877270468319	CYP11B1	cg23365637	441	-4.11886737596878	0.289903422872882	0.850444724012854	ACE	cg04554613	441	1.28880248606448	0.339568881746378	0.96942796809055	HTRA3	cg17114375	441	-2.49329605731529	0.331911597637853	0.955696380392164	HTRA1
cg03591753	441	0.516748835529382	0.362803335535315	0.98821050722751	POMC	cg19035496	441	0.433975149243085	0.351077315347196	0.990927793603041	DRD2	cg03591753	441	-0.617229030961014	0.404314000986301	0.993106697966735	POMC	cg17305181	441	0.379598235995362	0.375360478579422	0.990877270468319	TH	cg04091563	441	0.361119136595809	0.290029382781557	0.850444724012854	POMC	cg18785742	441	2.76281845147855	0.34070494336931	0.96942796809055	DRD2	cg19878200	441	0.531015895528601	0.331945945014016	0.955696380392164	AVPR1A
cg04204669	441	0.413967321819235	0.363718473073329	0.98821050722751	DRD3	cg09576143	441	0.645925788721742	0.35272221615808	0.990927793603041	FKBP5	cg04566694	441	-0.611529385842	0.405061205208623	0.993106697966735	HTRA3	cg17036562	441	-0.213424759736703	0.375516546510008	0.990877270468319	HTR7	cg16335926	441	3.23497854232261	0.292669223635893	0.852855192254941	HTRA1	cg10712173	441	-5.60170088253909	0.343562568489369	0.96942796809055	LEP	cg05961700	441	-0.558273304500161	0.332580187742747	0.955696380392164	HTRA3
cg06531741	441	0.305432710529628	0.366230482317573	0.98821050722751	NR3C1	cg17220584	441	-0.374068977066633	0.353142921651563	0.990927793603041	HTR3A	cg24738325	441	-2.16267815378852	0.405227084779595	0.993106697966735	SLC6A4	cg18584905	441	2.4380917169266	0.378351495136221	0.990877270468319	TH	cg01462353	441	-1.10890127218998	0.293690381406622	0.852855192254941	H6PD	cg06751221	441	-2.56737316160706	0.344356956809677	0.96942796809055	HTR4	cg06417522	441	3.96138109594175	0.333720176463901	0.955696380392164	NR3C1
cg04443360	441	0.307350645100598	0.368541508614391	0.98821050722751	HTR3C	cg21881537	441	-1.05037251423966	0.354710891951701	0.990927793603041	CYP11A1	cg09798090	441	0.365096927758117	0.40601862820603	0.993106697966735	HTR1E	cg02318454	441	0.328074354375647	0.379263763044783	0.990877270468319	POMC	cg24057680	441	-6.20055709470524	0.294327742979287	0.852855192254941	ACE	cg04735509	441	0.588700548459588	0.346270690034412	0.96942796809055	NR3C2	cg13857519	441	0.562817816819023	0.334059543578949	0.955696380392164	HTR5A
cg07806248	441	-0.221592692521651	0.371346679696367	0.98821050722751	NR3C1	cg03857453	441	3.30442418641283	0.356610741222283	0.990927793603041	POMC	cg05939495	441	0.735068521494755	0.407366689744925	0.993106697966735	NR3C2	cg27528351	441	0.553001180062946	0.381976579116746	0.990877270468319	COMT	cg10913456	441	-7.43148277280733	0.298625886514347	0.857220939743317	CRHR2	cg09277575	441	0.519653723458693	0.346737872122567	0.96942796809055	HTR1E	cg13499155	441	0.468698426386356	0.33539868329924	0.955696380392164	HTR5A
cg03084214	441	-0.285896329572112	0.373018954945079	0.98821050722751	POMC	cg22546130	441	0.869264802532542	0.357345995824804	0.990927793603041	HSD11B2	cg06841846	441	0.69776880941674	0.407373376308728	0.993106697966735	HTR4	cg04735509	441	0.306769446050643	0.384087506374231	0.990877270468319	NR3C2	cg15910486	441	2.95990566302779	0.299503125253433	0.857220939743317	HTRA1	cg13996731	441	-4.96292773981665	0.346810733669489	0.96942796809055	CRHR2	cg03176729	441	0.519018842007054	0.336103463933748	0.955696380392164	SRD5A2
cg12457376	441	-1.26456888551025	0.373051461070226	0.98821050722751	DDC	cg16012111	441	2.83514492703894	0.358738641792275	0.990927793603041	HTRA1	cg06492144	441	0.30188431770769	0.40945767302753	0.993106697966735	PROP1	cg04856689	441	-0.984924973064959	0.387601224330548	0.990877270468319	NR3C2	cg18442632	441	0.821614718918838	0.301608952178986	0.857220939743317	TH	cg24547396	441	-1.75294072817502	0.347701426881307	0.96942796809055	SLC6A4	cg02040921	441	-2.62747539575984	0.336765387041971	0.955696380392164	TBX19
cg18023598	441	0.873371274426687	0.373721999213351	0.98821050722751	TH	cg23085912	441	0.372042715013499	0.359415532597542	0.990927793603041	HSD11B2	cg01516872	441	0.536520310333149	0.4097398464513	0.993106697966735	HSD11B1	cg04900872	441	0.436959962013742	0.388452910018786	0.990877270468319	HTRA3	cg08894761	441	0.323358035974692	0.302886174939588	0.857220939743317	DRD1	cg06669759	441	1.28240017271039	0.349562653530294	0.96942796809055	NR3C1	cg12746356	441	5.76223486767586	0.337597895227318	0.955696380392164	HTR5A
cg07102705	441	0.214263354657277	0.374055341981205	0.98821050722751	HTR4	cg04967039	441	-0.357880914166626	0.362735743266018	0.990927793603041	NR3C2	cg10953410	441	-0.200319291939875	0.410785957585971	0.993106697966735	HTR5A	cg26932364	441	0.602559420408651	0.390431890569976	0.990877270468319	COMT	cg25836061	441	1.81486798305296	0.304333785553072	0.857220939743317	MC4R	cg04768425	441	0.659639437505211	0.350485823519703	0.96942796809055	NR3C2	cg07464571	441	0.585447379749314	0.338000046418954	0.955696380392164	HTR4
cg12248358	441	0.36069357630737	0.37417172085198	0.98821050722751	HTR5A	cg07075299	441	-1.63626183249973	0.363306899707241	0.990927793603041	NR3C1	cg04199256	441	0.855501201212607	0.411754012751099	0.993106697966735	DRD3	cg12782180	441	-0.343625205996482	0.391331466430552	0.990877270468319	CRHR2	cg02440279	441	-6.5860994914245	0.304710530866387	0.857220939743317	POMC	cg02299946	441	-3.35628399853198	0.350633424332343	0.96942796809055	POMC	cg21901156	441	-0.581019719565273	0.339930956840357	0.955696380392164	CYP11A1
cg04199779	441	2.47141420564063	0.376096948144568	0.98821050722751	DRD3	cg26932364	441	0.753718457040782	0.367435068261266	0.990927793603041	COMT	cg05624376	441	-0.550837806053479	0.413996005555384	0.993106697966735	NR3C2	cg23598419	441	0.782249597087949	0.394543850184391	0.990877270468319	ACE	cg24257309	441	1.39735306078667	0.304745400773924	0.857220939743317	CRHR1	cg09394608	441	1.05379004652684	0.350977245764754	0.96942796809055	FKBP5	cg17647537	441	-0.356295108973665	0.340581357510039	0.955696380392164	TH
cg23598419	441	0.704048094285917	0.37748669718359	0.98821050722751	ACE	cg18019515	441	5.19959286539875	0.370258473793669	0.990927793603041	TPH1	cg23409074	441	0.256364420403298	0.415681789063651	0.993106697966735	ACE	cg23185751	441	-0.367732720222025	0.396347087153474	0.990877270468319	CRHR1	cg21905167	441	1.73035130263116	0.306676682797116	0.857220939743317	CYP11A1	cg02711929	441	-0.853884508345556	0.351976524528576	0.96942796809055	SRD5A2	cg06045576	441	0.743897686425827	0.340792166952311	0.955696380392164	HTRA3
cg27579609	441	1.1891919334685	0.377947539189119	0.98821050722751	COMT	cg25150846	441	0.392643388328926	0.370700577142432	0.990927793603041	SLC6A4	cg10930664	441	-0.80188915731201	0.415705392802914	0.993106697966735	CRHR2	cg12670061	441	-3.11753045989711	0.398513049188808	0.990877270468319	CRHR2	cg14896516	441	0.813087976069082	0.306769563562171	0.857220939743317	HTRA1	cg19226017	441	1.03695674385154	0.352730758111841	0.96942796809055	HTR3A	cg04278702	441	0.560683547647996	0.341594516328917	0.955696380392164	POU1F1
cg16844661	441	0.438919050323944	0.377948603332002	0.98821050722751	HTRA1	cg24680141	441	-3.13775074063372	0.371168471600931	0.990927793603041	ACE	cg17875135	441	1.25686710757151	0.416556817191457	0.993106697966735	HTR3A	cg04443360	441	0.324698883058424	0.404467179223738	0.990877270468319	HTR3C	cg05082563	441	0.794664594142055	0.308488930234539	0.857220939743317	HTRA3	cg08569242	441	5.4822218756211	0.353715451327729	0.96942796809055	HTR4	cg23913482	441	-3.27237411688898	0.343016675159122	0.955696380392164	CRHR1
cg20423536	441	-0.545565023814118	0.38356474230543	0.98821050722751	TPH2	cg15607306	441	-0.452682442512132	0.373192334665202	0.990927793603041	HTRA1	cg03279206	441	-0.40864900868634	0.417779989068873	0.993106697966735	SRD5A2	cg26969596	441	0.268791737062003	0.40460430108762	0.990877270468319	COMT	cg10901968	441	5.98620097672103	0.308646126402146	0.857220939743317	DDC	cg01516872	441	-0.937604646098809	0.356767626268583	0.96942796809055	HSD11B1	cg12715421	441	0.642628846178536	0.346458412729125	0.955696380392164	DDC
cg18998365	441	-0.372906517761177	0.383635159539925	0.98821050722751	TH	cg06941869	441	-0.449190493852555	0.374061142223308	0.990927793603041	SRD5A1	cg02440279	441	3.41412125796511	0.418973543951653	0.993106697966735	POMC	cg19014730	441	-0.441374383192275	0.40461308608592	0.990877270468319	DRD2	cg27304079	441	-4.97906231239277	0.311330457173279	0.861425625862906	COMT	cg18757974	441	-2.92632678920367	0.356976467831001	0.96942796809055	DRD2	cg08479865	441	-0.328512559171109	0.346880458491768	0.955696380392164	PROP1
cg12758687	441	-0.317917302880526	0.386529617415375	0.98821050722751	LEP	cg17537380	441	0.349849467782666	0.378555623413292	0.990927793603041	HTR3B	cg19878200	441	0.365242773771487	0.41930541003318	0.993106697966735	AVPR1A	cg01620540	441	0.280515274954707	0.406960852409143	0.990877270468319	HTR6	cg02716646	441	0.586929548915593	0.316979021251164	0.871636439633096	DHRS9	cg13857519	441	0.696200649759358	0.357374317280179	0.96942796809055	HTR5A	cg19837528	441	-0.85693074849561	0.348583654186962	0.955696380392164	AVPR1A
cg18007806	441	0.259055875627523	0.386800480437548	0.98821050722751	HTR3A	cg05939495	441	0.809715871305774	0.378844687387157	0.990927793603041	NR3C2	cg25276126	441	0.354638196507146	0.419817893749248	0.993106697966735	SLC6A4	cg09926649	441	-0.670506731436575	0.407026778615825	0.990877270468319	HTR1E	cg16845257	441	0.971294774033093	0.317389355735964	0.871636439633096	HTRA1	cg08473090	441	-1.49560075497834	0.358320314618888	0.96942796809055	NR3C1	cg01443318	441	0.76223088774411	0.349241077418048	0.955696380392164	H6PD
cg14896516	441	0.361753335223354	0.387019004480187	0.98821050722751	HTRA1	cg18640030	441	0.256725304685371	0.378866626203195	0.990927793603041	HTR3B	cg19107055	441	-0.469854283761523	0.422441326462159	0.993106697966735	HTR3B	cg22442841	441	0.751635033230754	0.409938781505087	0.990877270468319	CYP11A1	cg13131263	441	-4.3551655403782	0.320104859623014	0.875439992567058	DDC	cg22701672	441	2.40468604413407	0.36030704318292	0.96942796809055	HSD11B2	cg00365524	441	0.631980872958946	0.35404165573818	0.955696380392164	HTR6
cg22900229	441	1.81765013224861	0.387593371040778	0.98821050722751	HSD11B2	cg20518096	441	0.394798145367317	0.379029737599248	0.990927793603041	AVPR1A	cg09025327	441	0.89109282501507	0.422520352710797	0.993106697966735	FKBP5	cg00701951	441	-0.527188123393079	0.418237453380398	0.990877270468319	HSD11B1	cg17426905	441	-0.878104920625991	0.321163124396558	0.875439992567058	TH	cg00130530	441	1.13788987397681	0.363112273557397	0.96942796809055	H6PD	cg27068143	441	-0.550521613302709	0.354435085291768	0.955696380392164	COMT
cg27521571	441	-0.26990322314697	0.388344284380368	0.98821050722751	COMT	cg18998365	441	-0.518498026050724	0.379450131712687	0.990927793603041	TH	cg20178075	441	0.272186681408947	0.425482684336664	0.993106697966735	AVPR1A	cg06045576	441	0.454699631345476	0.418764823441062	0.990877270468319	HTRA3	cg06836480	441	0.922055737428749	0.322342714654447	0.875439992567058	NR3C1	cg21702128	441	0.287350665843974	0.363911893908136	0.96942796809055	CYP11A1	cg07061368	441	-0.798604030496139	0.359306413318136	0.955696380392164	NR3C1
cg20804163	441	-1.11071322669673	0.38943274929359	0.98821050722751	HTR2A	cg11338049	441	-1.5322549532194	0.379993617672475	0.990927793603041	DDC	cg22549881	441	0.154466788617924	0.426830485483307	0.993106697966735	HSD11B2	cg13381984	441	-0.22703672947129	0.420964064372311	0.990877270468319	HTR5A	cg18146873	441	-4.19237629090643	0.327759570639638	0.881914995346861	TH	cg19502744	441	0.30598887653313	0.364197511929315	0.96942796809055	DRD2	cg00454577	441	2.05019443749775	0.35975410294408	0.955696380392164	TBX19
cg24578679	441	-3.21402194079149	0.389593775728556	0.98821050722751	CRHR1	cg14714364	441	0.318332276541154	0.384991806046584	0.990927793603041	CYP11B1	cg27051089	441	-0.33523015597472	0.432356584154006	0.993106697966735	COMT	cg17095936	441	-0.218244852769536	0.422177937386703	0.990877270468319	HTR7	cg03084214	441	0.621601259724422	0.329068357549422	0.881914995346861	POMC	cg18584905	441	-4.57735691766195	0.364753183746703	0.96942796809055	TH	cg00603617	441	4.61169860033318	0.361685884873316	0.955696380392164	H6PD
cg04863452	441	0.55151249883596	0.392982766342452	0.98821050722751	NR3C2	cg00674304	441	1.95199858854726	0.386996385356648	0.990927793603041	H6PD	cg23042775	441	0.42654479560782	0.432995382945069	0.993106697966735	HSD11B2	cg20518096	441	0.299341438195128	0.424273612606008	0.990877270468319	AVPR1A	cg26160839	441	-0.649673880719164	0.329571797945354	0.881914995346861	AVP	cg12761518	441	-0.990563380669907	0.36481106895433	0.96942796809055	DDC	cg17342132	441	0.999651652204892	0.362540208439504	0.955696380392164	HTR3B
cg13748928	441	1.08789385343176	0.3932246713343	0.98821050722751	DDC	cg17307280	441	2.56717923319722	0.388609662422376	0.990927793603041	HTR3A	cg25017777	441	1.26966056366828	0.433965791139992	0.993106697966735	ACE	cg10930664	441	-0.687485967074291	0.427019250354905	0.990877270468319	CRHR2	cg22827011	441	0.407121108292615	0.330157436914952	0.881914995346861	HSD11B2	cg09297468	441	0.451295898067972	0.36507427808555	0.96942796809055	HTR1E	cg11247289	441	0.850027317362151	0.363073421857644	0.955696380392164	DDC
cg06020661	441	0.447644969267195	0.39439467377905	0.98821050722751	HTRA3	cg18701449	441	0.356485901289762	0.388930495995327	0.990927793603041	DRD2	cg17085721	441	-2.3774552264571	0.434869239624533	0.993106697966735	HTRA1	cg09495977	441	1.69693306901782	0.429142075780566	0.990877270468319	FKBP5	cg10953410	441	0.35214763841716	0.333916864407038	0.881914995346861	HTR5A	cg19594666	441	-0.38162018805315	0.366624391580954	0.96942796809055	HTR3A	cg23027580	441	-2.55357885601157	0.36522248727132	0.955696380392164	HSD11B2
cg22458194	441	1.71402079274321	0.395829511460538	0.98821050722751	CYP11A1	cg11731737	441	2.41453093306307	0.389721707036607	0.990927793603041	CRHR2	cg25058023	441	0.266546003461615	0.435640752271335	0.993106697966735	ACE	cg19930203	441	0.449608475041016	0.43057796919906	0.990877270468319	TPH2	cg01732037	441	0.722009131936449	0.335380641860543	0.881914995346861	H6PD	cg10025865	441	-0.432488316794915	0.367586001862671	0.96942796809055	HTR1E	cg06531741	441	-0.486839616350617	0.366622440624565	0.955696380392164	NR3C1
cg10930664	441	-0.647551679403475	0.39595224548037	0.98821050722751	CRHR2	cg26160839	441	0.398798173269639	0.389767524291282	0.990927793603041	AVP	cg06778429	441	3.71227638329711	0.437646241013655	0.993106697966735	NR3C1	cg15926585	441	0.346117912206785	0.431446051750556	0.990877270468319	CYP17A1	cg16012111	441	-4.32865493366914	0.335956360081889	0.881914995346861	HTRA1	cg01462353	441	-0.997836816429687	0.367861076693646	0.96942796809055	H6PD	cg02955911	441	1.82517775504488	0.367091115422541	0.955696380392164	POMC
cg14714364	441	0.227878388127033	0.396007515691221	0.98821050722751	CYP11B1	cg08700190	441	0.465384436703815	0.390441672515746	0.990927793603041	PROP1	cg18954700	441	3.63064681796481	0.43804808780412	0.993106697966735	DRD2	cg02577436	441	-1.12111227566916	0.433851417913883	0.990877270468319	DHRS9	cg22059812	441	-3.72018691743476	0.336195132095142	0.881914995346861	CYP11A1	cg02501334	441	-4.16518255748532	0.368289506721154	0.96942796809055	POMC	cg14754494	441	0.712063114054223	0.3672137314805	0.955696380392164	CYP11B1
cg10874403	441	0.248469700148897	0.397425260980868	0.98821050722751	CRHR2	cg02187522	441	1.76615751519555	0.391943699648567	0.990927793603041	HTR6	cg04967039	441	-0.289088423040315	0.438966861931121	0.993106697966735	NR3C2	cg25836326	441	0.558261183064701	0.435561867933916	0.990877270468319	MC2R	cg00269606	441	0.474069069509041	0.337334462472375	0.881914995346861	HTR6	cg19354750	441	-3.2583077594719	0.370004751048634	0.96942796809055	HTR3A	cg22059812	441	-2.82268309040576	0.36741762660601	0.955696380392164	CYP11A1
cg09863950	441	0.386020334903049	0.397776484214193	0.98821050722751	HTR1E	cg23720528	441	-0.332442734023711	0.393122898827392	0.990927793603041	SLC6A4	cg02712145	441	-0.585419729812832	0.439849080010769	0.993106697966735	SRD5A2	cg09366519	441	0.325171081511544	0.438359904066388	0.990877270468319	FKBP5	cg24164005	441	-1.26426063839974	0.338855353831064	0.881914995346861	CRHR1	cg12670061	441	5.93612751256021	0.370121275860658	0.96942796809055	CRHR2	cg21960184	441	0.346750357579226	0.368564865831909	0.955696380392164	CYP11A1
cg11731737	441	1.79099568862627	0.398410142816516	0.98821050722751	CRHR2	cg25190094	441	2.41657132255303	0.393216542219158	0.990927793603041	PRKAR1A	cg07843056	441	2.58491772456468	0.43998516798967	0.993106697966735	SRD5A1	cg26464934	441	-0.322905383541864	0.439894839583053	0.990877270468319	AVP	cg19354750	441	3.20102463159725	0.340107696621852	0.881914995346861	HTR3A	cg04204669	441	-0.846874941433414	0.373311972693358	0.972507927733828	DRD3	cg25114611	441	0.836423076924342	0.369896809879268	0.955696380392164	SLC6A4
cg03056854	441	0.351423547823528	0.398634883397559	0.98821050722751	HTR2B	cg14349956	441	-1.68193072007101	0.396925866785337	0.990927793603041	CRH	cg16586394	441	-0.652701729885723	0.441907148833702	0.993106697966735	HTRA1	cg23524341	441	1.45960226250415	0.441993186053793	0.990877270468319	ACE	cg15868400	441	2.27300594053746	0.341931782939244	0.881914995346861	HTRA1	cg02716646	441	-0.520492986712613	0.376109979404637	0.972507927733828	DHRS9	cg18773997	441	-0.634296979612503	0.37012867090909	0.955696380392164	DRD2
cg01620540	441	0.2495963527631	0.400640174054098	0.98821050722751	HTR6	cg01220564	441	0.744150561436842	0.398804485619561	0.990927793603041	H6PD	cg26741280	441	1.32313747907407	0.442874315208928	0.993106697966735	COMT	cg02992588	441	0.312125071311486	0.442036970256321	0.990877270468319	DHRS9	cg11152298	441	-6.3994301794475	0.342951736196288	0.881914995346861	HTR5A	cg19930203	441	-0.892831832870316	0.377844577552538	0.972507927733828	TPH2	cg03321592	441	0.282724060018339	0.370599315589834	0.955696380392164	POMC
cg03560973	441	0.404848057561404	0.401148606155585	0.98821050722751	SRD5A2	cg25394652	441	2.94512324671056	0.39966984696896	0.990927793603041	CRHR1	cg00666422	441	-0.194914756516461	0.443166319063726	0.993106697966735	HTR6	cg05723130	441	-2.0004160489543	0.442596471913456	0.990877270468319	HTRA3	cg21773872	441	0.832192546455134	0.34769849314873	0.881914995346861	CYP11A1	cg10906284	441	0.401998320909065	0.378278993741284	0.972507927733828	CRHR2	cg18068537	441	0.952835951205708	0.371472765772454	0.955696380392164	DRD2
cg15347662	441	-0.807231831435588	0.401220186959366	0.98821050722751	HTRA1	cg22584138	441	0.51321720980923	0.401010213784052	0.990927793603041	HSD11B2	cg02665568	441	-0.918055447295385	0.443272835210782	0.993106697966735	DHRS9	cg10207656	441	0.681537832924918	0.442840467545659	0.990877270468319	FKBP5	cg26532621	441	0.857186835369262	0.348754224927144	0.881914995346861	AVP	cg10930664	441	-1.34903617244544	0.383127461720022	0.972507927733828	CRHR2	cg04111177	441	-3.55366749118309	0.372268745093482	0.955696380392164	SRD5A2
cg07275757	441	0.259011346390917	0.401980701542493	0.98821050722751	DRD1	cg19014730	441	-0.522211891763483	0.406223227006183	0.990927793603041	DRD2	cg19730798	441	2.6530442740637	0.443795189071424	0.993106697966735	TPH2	cg06828613	441	-0.296964462817239	0.44365751468665	0.990877270468319	NR3C1	cg17305181	441	0.68369511931889	0.349515237191545	0.881914995346861	TH	cg04987827	441	6.38261546567687	0.383320197527962	0.972507927733828	NR3C2	cg26656751	441	-0.771602085570309	0.372669648332271	0.955696380392164	COMT
cg26724798	441	0.206290186223307	0.40224486477758	0.98821050722751	COMT	cg10300814	441	-1.52631516942273	0.40642989119872	0.990927793603041	FKBP5	cg23570923	441	-0.876748884315775	0.444610757016516	0.993106697966735	SLC6A4	cg25669230	441	0.429247327564249	0.444276974558213	0.990877270468319	MC4R	cg12816057	441	0.58059393462368	0.350782732310106	0.881914995346861	DDC	cg08479865	441	-0.391925970711421	0.386339980489741	0.972507927733828	PROP1	cg08730070	441	-1.77765811497893	0.378324849056518	0.9668301698111	SRD5A1
cg13175282	441	0.79645002896281	0.40583671777833	0.98821050722751	DDC	cg07778819	441	0.263618014929425	0.406622204020583	0.990927793603041	DRD1	cg16845257	441	0.499679787371678	0.445734069392551	0.993106697966735	HTRA1	cg06020661	441	0.453971282038238	0.447008589369384	0.990877270468319	HTRA3	cg04204669	441	0.817074189400937	0.35212409652008	0.881914995346861	DRD3	cg14094793	441	2.56281093889092	0.387056135616847	0.972507927733828	HTR5A	cg09920557	441	-4.07207687849335	0.38104911168356	0.970422651207959	HTR1E
cg21919834	441	0.595656968370099	0.410923039134869	0.98821050722751	CYP11A1	cg00967901	441	-2.25794407655249	0.406716504394213	0.990927793603041	TBX19	cg22701672	441	-1.24304847521472	0.446712322724355	0.993106697966735	HSD11B2	cg08258978	441	0.3795436714203	0.44755321440735	0.990877270468319	PROP1	cg20518096	441	0.595071503287978	0.352463502178992	0.881914995346861	AVPR1A	cg21330703	441	2.6422470526675	0.387326588870695	0.972507927733828	SERPINA6	cg04900872	441	-0.619273487690256	0.384473025393686	0.974424546111622	HTRA3
cg21644468	441	0.349830764564057	0.411771176929551	0.98821050722751	SERPINA6	cg09490603	441	1.66612298193978	0.408768051168432	0.990927793603041	FKBP5	cg12807275	441	-0.377629809378723	0.446737152805129	0.993106697966735	DDC	cg24718866	441	0.73174317680466	0.45030700046932	0.990877270468319	PRKAR1A	cg12793238	441	3.31912458472622	0.352570913029921	0.881914995346861	DDC	cg18948125	441	0.366447327823446	0.388925276271533	0.972507927733828	TH	cg16302441	441	0.492838213560089	0.386021427927051	0.974424546111622	HTR7
cg08208133	441	-0.332705644337383	0.413255885777948	0.98821050722751	NR3C1	cg07733851	441	-0.814216275060465	0.40951634578728	0.990927793603041	NR3C1	cg17305181	441	0.36982516869457	0.451148904043377	0.993106697966735	TH	cg19457823	441	-0.339989406030383	0.45044808890078	0.990877270468319	TH	cg11990309	441	0.37505771282423	0.353424426973314	0.881914995346861	CYP3A4	cg16012111	441	-4.10323299021926	0.390670617547334	0.972507927733828	HTRA1	cg10045137	441	-1.83607260379764	0.386966843737545	0.974424546111622	FKBP5
cg04607131	441	0.336044037149644	0.413739843903072	0.98821050722751	NR3C2	cg18755984	441	0.357627528467912	0.410137386506746	0.990927793603041	TH	cg02236913	441	-0.229211016909763	0.451527016259871	0.993106697966735	POMC	cg16586394	441	-0.557053836469532	0.451456395095407	0.990877270468319	HTRA1	cg23329208	441	0.721583863540905	0.354188434464895	0.881914995346861	SLC6A4	cg18200810	441	0.747243204907625	0.396106654085599	0.972507927733828	HTR3B	cg24108194	441	-3.6284698547657	0.388176724950334	0.974424546111622	CRHR1
cg26966083	441	0.295964021565155	0.414645503775293	0.98821050722751	COMT	cg19715936	441	-1.49881883057269	0.410397136928443	0.990927793603041	TH	cg24862443	441	-1.38450822004365	0.451823568634242	0.993106697966735	ACE	cg19826045	441	-1.01918594056508	0.453460063255431	0.990877270468319	AVPR1A	cg26932364	441	1.11175473856505	0.35567692855172	0.881914995346861	COMT	cg23532924	441	0.604220020841132	0.396239028016989	0.972507927733828	ACE	cg10644575	441	0.358659850036902	0.389907064611672	0.974424546111622	HTR1E
cg18755984	441	0.257761964178482	0.41517396329986	0.98821050722751	TH	cg09366519	441	0.41523927514867	0.411292075870534	0.990927793603041	FKBP5	cg14855334	441	3.09800100332501	0.452287093625044	0.993106697966735	HTR7	cg17015994	441	0.416834789332782	0.453927478586529	0.990877270468319	HTRA1	cg18948125	441	0.368541480172505	0.356324180672509	0.881914995346861	TH	cg18233497	441	0.292082768198054	0.397842859350539	0.972507927733828	TPH1	cg15971888	441	-1.87149362009302	0.392255141440839	0.974424546111622	HTRA1
cg17307280	441	1.77789730851549	0.415407113468029	0.98821050722751	HTR3A	cg19594666	441	0.232576289954263	0.41182736979838	0.990927793603041	HTR3A	cg10588377	441	0.384818953168902	0.452605404385336	0.993106697966735	HTR1E	cg17426905	441	-0.386511389345262	0.455396198864297	0.990877270468319	TH	cg12017635	441	0.734688936983815	0.356902305029656	0.881914995346861	DDC	cg18421538	441	1.00406772784521	0.398629873344066	0.972507927733828	TH	cg26966083	441	0.487153061109932	0.393886463640189	0.974424546111622	COMT
cg23881278	441	-1.82729145864585	0.418805900386455	0.98821050722751	PRKAR1A	cg06020661	441	0.589229091157078	0.412747967072995	0.990927793603041	HTRA3	cg24433738	441	0.960451826800882	0.453746703777892	0.993106697966735	CRHR1	cg22614355	441	-0.979308947505	0.456658720940171	0.990877270468319	HSD11B2	cg20807790	441	0.42748201194877	0.356985270500058	0.881914995346861	HTR2A	cg14774364	441	0.572406291544379	0.399978853238333	0.972507927733828	CRH	cg04443360	441	0.45876175201732	0.394483489162113	0.974424546111622	HTR3C
cg10025865	441	0.190095680859341	0.418949829178966	0.98821050722751	HTR1E	cg00712943	441	0.265052197225274	0.415870710550028	0.990927793603041	HTR6	cg08033551	441	0.682279703377102	0.456278507465647	0.993106697966735	NR3C1	cg24922596	441	0.263858794350382	0.461313838326485	0.990877270468319	ACE	cg27551605	441	0.672886369801364	0.357079712789897	0.881914995346861	COMT	cg26814075	441	-0.454543290429919	0.403845603285111	0.972507927733828	COMT	cg11712482	441	-0.854750137632576	0.394536025463673	0.974424546111622	HTR5A
cg13365022	441	0.348464444871829	0.419327396737412	0.98821050722751	AKR1D1	cg01586609	441	-0.328339307878101	0.417864700136194	0.990927793603041	HTR6	cg24164005	441	-0.657615159305046	0.456819808918207	0.993106697966735	CRHR1	cg12367389	441	0.412724551433189	0.464675342994012	0.990877270468319	DDC	cg12746356	441	6.76598180113806	0.359129956465074	0.883445724980844	HTR5A	cg18773129	441	-1.9741965542513	0.403986413994505	0.972507927733828	TH	cg04144768	441	-0.971978499633776	0.398955156857259	0.982043463033254	HTR3C
cg09394608	441	-0.43388918862595	0.420285147699831	0.98821050722751	FKBP5	cg01462353	441	0.614900513712908	0.418838994668388	0.990927793603041	H6PD	cg05136169	441	-1.30172117480624	0.458146239754752	0.993106697966735	HTRA3	cg05136169	441	1.12678812725614	0.465911264412294	0.990877270468319	HTRA3	cg21191514	441	0.40380919989044	0.361287345462314	0.883445724980844	HTR2A	cg25782665	441	-0.772362497596061	0.404325647609189	0.972507927733828	MC4R	cg14284211	441	1.10099976808699	0.40203631051999	0.984672848472824	CRH
cg23974739	441	0.342087684750874	0.421054604073487	0.98821050722751	ACE	cg25730237	441	-0.681704555249424	0.419739961757109	0.990927793603041	MC4R	cg06860277	441	-0.570922273878894	0.458220270854769	0.993106697966735	NR3C1	cg23612570	441	-0.394865631118768	0.46669431380336	0.990877270468319	PRKAR1A	cg26344168	441	0.294137068294545	0.361300493504394	0.883445724980844	AVP	cg20073007	441	-1.27109496515133	0.405373468581172	0.972507927733828	TPH2	cg09366519	441	0.484981097051148	0.405030909453636	0.984672848472824	FKBP5
cg03565659	441	0.814230731240903	0.421418165281483	0.98821050722751	SRD5A2	cg04554613	441	0.743052014737278	0.420415021376292	0.990927793603041	HTRA3	cg06045576	441	0.478018936195482	0.458920949879251	0.993106697966735	HTRA3	cg09394608	441	-0.44459447311895	0.467259354534998	0.990877270468319	FKBP5	cg12728623	441	2.25009118367308	0.367802833821539	0.884609055142231	LEP	cg13251292	441	-0.455329670977111	0.407920211530468	0.972507927733828	DDC	cg10185667	441	-2.24320476115188	0.405163967092801	0.984672848472824	HTR1E
cg17426905	441	-0.364293899065316	0.423132173540559	0.98821050722751	TH	cg18068537	441	0.746020261972973	0.420854160961854	0.990927793603041	DRD2	cg01620540	441	0.286658040288602	0.459923756600986	0.993106697966735	HTR6	cg16642545	441	0.289056134862285	0.467711212782144	0.990877270468319	HTRA1	cg12715421	441	0.757706668236758	0.36799427721834	0.884609055142231	DDC	cg02131967	441	-5.40584796238356	0.409955763259492	0.972507927733828	HTR6	cg04566694	441	-0.735425461023707	0.406901416576057	0.984672848472824	HTRA3
cg24661173	441	0.252521311971617	0.424561071664808	0.98821050722751	ACE	cg27528351	441	0.610336152541989	0.422791139498409	0.990927793603041	COMT	cg11361387	441	0.627276901722068	0.46210270062971	0.993106697966735	DDC	cg25924472	441	-0.147855963636619	0.468139483136752	0.990877270468319	MC4R	cg21960184	441	0.427921777557241	0.368031225572063	0.884609055142231	CYP11A1	cg19730798	441	-4.44366833519961	0.412512767765027	0.972507927733828	TPH2	cg01220564	441	0.850397943308033	0.408013716738642	0.984672848472824	H6PD
cg08473090	441	-0.624520518625326	0.425418970734676	0.98821050722751	NR3C1	cg12583095	441	-1.52366395362858	0.424202058183928	0.990927793603041	LEP	cg13781869	441	-0.584018051155752	0.462695630592932	0.993106697966735	LEP	cg04422019	441	-0.562014493139199	0.469317407709063	0.990877270468319	DRD3	cg19502744	441	0.285101737320295	0.371824065473617	0.884609055142231	DRD2	cg06346307	441	-1.14712924067715	0.417043915238998	0.972507927733828	HTR4	cg20073007	441	0.974468859332427	0.408050569000287	0.984672848472824	TPH2
cg21702128	441	0.122834239506026	0.426902599688222	0.98821050722751	CYP11A1	cg27579609	441	1.42544705617945	0.426671472541772	0.990927793603041	COMT	cg10741760	441	0.215104617099614	0.470500814173786	0.993106697966735	LEP	cg14065127	441	0.36736914103314	0.47271126274143	0.990877270468319	LEP	cg00078348	441	0.582395799564855	0.371933250312953	0.884609055142231	TBX19	cg02236913	441	-0.385619008182209	0.419017132464201	0.972507927733828	POMC	cg25150846	441	0.412590827749238	0.409710205711279	0.98520383322641	SLC6A4
cg24394631	441	0.213205348703521	0.434854783897823	0.98821050722751	SLC6A4	cg00293936	441	-1.79063247287127	0.426991347529667	0.990927793603041	HTR6	cg13051970	441	-0.459574628611294	0.4707042740632	0.993106697966735	DDC	cg13748928	441	1.03803657649505	0.473156838971075	0.990877270468319	DDC	cg05756489	441	0.481896154560686	0.372262342999878	0.884609055142231	HTRA3	cg00930194	441	0.538027696781058	0.420548639581185	0.972507927733828	TBX19	cg18757974	441	-2.02281928148817	0.411435572753263	0.98520383322641	DRD2
cg17342132	441	0.54831663086228	0.434968900470035	0.98821050722751	HTR3B	cg13645651	441	-0.275519213386959	0.427606720671296	0.990927793603041	CRHR2	cg24661173	441	0.296763190202701	0.47298232250609	0.993106697966735	ACE	cg02501334	441	1.83176068385974	0.473457386516343	0.990877270468319	POMC	cg10276623	441	0.407806224502888	0.373282152362718	0.884609055142231	HTR1E	cg17805199	441	-1.47797068785275	0.421336165804	0.972507927733828	DRD2	cg25271841	441	-0.339686129868465	0.412469058778368	0.98520383322641	CRHR1
cg26466234	441	0.976101149193943	0.43581230479053	0.98821050722751	AVP	cg17305181	441	0.404391874074568	0.430506415125537	0.990927793603041	TH	cg01926269	441	1.07521150505716	0.473176898509363	0.993106697966735	H6PD	cg02040921	441	1.42048162768138	0.473631447580334	0.990877270468319	TBX19	cg22442841	441	1.37909754063623	0.373679237789496	0.884609055142231	CYP11A1	cg18529845	441	0.21675238736751	0.422325708280114	0.972507927733828	TH	cg15003182	441	-0.821100434214209	0.413781309735879	0.98520383322641	HTRA1
cg09277575	441	0.209322952869972	0.439362457243864	0.98821050722751	HTR1E	cg12243453	441	0.59278511722259	0.433138685138667	0.990927793603041	DDC	cg25394652	441	2.40986779270724	0.473581340611402	0.993106697966735	CRHR1	cg01145353	441	-0.733284105058182	0.474863166469526	0.990877270468319	TBX19	cg00242031	441	0.628475748716445	0.373771253296485	0.884609055142231	H6PD	cg20060666	441	-2.15276705175546	0.423336038886127	0.972507927733828	TPH2	cg13175282	441	1.22944934498116	0.417400719133198	0.98520383322641	DDC
cg20140452	441	-1.11647329801281	0.441008814866662	0.98821050722751	TPH2	cg01516872	441	0.532453185672657	0.435552435180785	0.990927793603041	HSD11B1	cg11990309	441	0.19293866007598	0.476012695258665	0.993106697966735	CYP3A4	cg05141787	441	0.396575051702546	0.478554154001771	0.990877270468319	HTRA3	cg14642437	441	-1.89912843063914	0.374180830265502	0.884609055142231	CRH	cg03721064	441	4.47665357281593	0.427941125577398	0.972507927733828	DHRS9	cg26332534	441	-3.38564560319224	0.419343345949687	0.98520383322641	AVP
cg11298960	441	0.34291210393168	0.444292918131982	0.98821050722751	DDC	cg25836326	441	0.664771097228896	0.435751986486626	0.990927793603041	MC2R	cg04204669	441	0.423083133423534	0.478151373471292	0.993106697966735	DRD3	cg18233497	441	0.135684518489732	0.478722410565835	0.990877270468319	TPH1	cg16830379	441	0.773485567841936	0.375365617215737	0.884609055142231	HTRA1	cg01274715	441	-2.26485155839751	0.428805302146303	0.972507927733828	HTR6	cg11731737	441	-2.93774994845253	0.420932897874844	0.98520383322641	CRHR2
cg07194846	441	0.32341969530569	0.445033647180614	0.98821050722751	SRD5A1	cg02955911	441	-1.40890945005383	0.436528392292723	0.990927793603041	POMC	cg11845071	441	2.42790393360835	0.478177781385505	0.993106697966735	CRHR2	cg01192538	441	-0.251477328191445	0.478774536494371	0.990877270468319	H6PD	cg18421538	441	1.00948557478885	0.376482863625675	0.884609055142231	TH	cg22546130	441	-1.12349126530823	0.429003876805487	0.972507927733828	HSD11B2	cg06846259	441	-0.317146734769167	0.4238851323638	0.98520383322641	NR3C1
cg08573687	441	0.161835687705017	0.446475091761378	0.98821050722751	SRD5A1	cg27304079	441	2.57573064769002	0.438997947502859	0.990927793603041	COMT	cg00454577	441	1.31060711020596	0.480376142146802	0.993106697966735	TBX19	cg24578679	441	-2.99635105949936	0.480284943334718	0.990877270468319	CRHR1	cg09516959	441	0.533855313923908	0.37779040949778	0.884609055142231	HTR1E	cg26126367	441	-1.70414860751832	0.429843997946128	0.972507927733828	AVP	cg05939495	441	0.848226706913647	0.425232475780815	0.98520383322641	NR3C2
cg26464411	441	-1.24098429966034	0.450293881534455	0.98821050722751	AVP	cg25121146	441	-0.192005231118703	0.441880365129652	0.990927793603041	PRKAR1A	cg09495977	441	1.73626555455141	0.482848221310118	0.993106697966735	FKBP5	cg06623827	441	0.299175051820313	0.480538560162324	0.990877270468319	HTR4	cg07425204	441	0.991576252860657	0.379385572900202	0.884609055142231	HTR4	cg23951474	441	-0.665663797844599	0.434294144162333	0.972507927733828	CRHR1	cg03472798	441	1.3939206186334	0.425273529633312	0.98520383322641	POMC
cg17637877	441	-0.253650790233974	0.451656076350086	0.98821050722751	DRD2	cg22900229	441	2.21388391988355	0.441971390705225	0.990927793603041	HSD11B2	cg17095936	441	-0.217675183299318	0.483082986653178	0.993106697966735	HTR7	cg12746356	441	-3.0379245663959	0.480899032231715	0.990877270468319	HTR5A	cg16188532	441	-1.25849272911937	0.380473964480512	0.884609055142231	HTRA1	cg06291867	441	-0.949377979535145	0.435008480577248	0.972507927733828	DRD1	cg03560973	441	0.608130203340385	0.427065290379004	0.98520383322641	SRD5A2
cg05454635	441	0.687017359476115	0.451971363719947	0.98821050722751	HTRA3	cg17647537	441	0.246318741855373	0.443643460688973	0.990927793603041	TH	cg09914773	441	-0.475672385674633	0.483122903679036	0.993106697966735	FKBP5	cg09576143	441	0.40742857997603	0.481277142944116	0.990877270468319	FKBP5	cg27503360	441	1.1830894878067	0.381723149295255	0.884609055142231	COMT	cg19715936	441	-2.05090096364631	0.439404895357539	0.972507927733828	TH	cg12577105	441	2.795691018309	0.430544921979862	0.98520383322641	DDC
cg18529845	441	-0.095753785802694	0.452577239813831	0.98821050722751	TH	cg14094793	441	1.51709757381818	0.444167165606767	0.990927793603041	HTR5A	cg24578679	441	-3.41289867751683	0.483749485548034	0.993106697966735	CRHR1	cg06149357	441	0.167735400250769	0.481825099058127	0.990877270468319	HTRA3	cg06751221	441	-2.23159549166944	0.382208803716344	0.884609055142231	HTR4	cg24862443	441	-2.19194923553657	0.441653285288683	0.972507927733828	ACE	cg16811558	441	1.15990240925661	0.431900422627741	0.98520383322641	HTRA1
cg06669759	441	0.503186336368037	0.45306264551858	0.98821050722751	NR3C1	cg13175282	441	1.00569707515819	0.446159920322249	0.990927793603041	DDC	cg09394608	441	-0.488031393155906	0.484573509701428	0.993106697966735	FKBP5	cg03843951	441	0.411336480035657	0.482039584112681	0.990877270468319	POMC	cg25271841	441	-0.440449875441879	0.384802367185783	0.885333182748477	CRHR1	cg07724674	441	-4.76960213298445	0.441807448953227	0.972507927733828	NR3C1	cg25940513	441	0.755238569030545	0.432600211841668	0.98520383322641	MC2R
cg03321592	441	0.149798565523608	0.455371529003605	0.98821050722751	POMC	cg13025668	441	1.08106675739278	0.451496088951518	0.990927793603041	DDC	cg23085912	441	0.27035104642871	0.484615705180907	0.993106697966735	HSD11B2	cg11438011	441	0.143317198386505	0.483403547804733	0.990877270468319	CRHR2	cg23757489	441	0.539000276620195	0.385565947442025	0.885333182748477	ACE	cg00610228	441	-4.34477845005753	0.443898219670928	0.972507927733828	H6PD	cg10538202	441	-0.401950117817796	0.4341268843884	0.98520383322641	HTR1E
cg14325092	441	0.398503299091889	0.456258756605784	0.98821050722751	CYP11B1	cg03570920	441	-0.168668516403698	0.455452548001525	0.990927793603041	SRD5A2	cg27068143	441	-0.34322383844769	0.485251942554147	0.993106697966735	COMT	cg18998365	441	-0.341921603683755	0.483815541846509	0.990877270468319	TH	cg00967901	441	-3.35042533057082	0.386130369106333	0.885333182748477	TBX19	cg18146873	441	-3.42091119444963	0.443919498461591	0.972507927733828	TH	cg21286526	441	1.47851794717448	0.437716732198194	0.98520383322641	HTR2A
cg20629239	441	0.890597573030285	0.458459753548641	0.98821050722751	TPH2	cg03024742	441	-0.245387513903012	0.455722412828139	0.990927793603041	SRD5A2	cg14714364	441	0.24648926045582	0.485345566404674	0.993106697966735	CYP11B1	cg17307280	441	1.73211882466694	0.485498619862766	0.990877270468319	HTR3A	cg08948964	441	-0.584509624297629	0.388386921938212	0.887741535858771	FKBP5	cg16332610	441	-2.70514368787481	0.445064075250716	0.972507927733828	HTR7	cg08241694	441	0.608705055641229	0.43788635244536	0.98520383322641	DRD1
cg21905167	441	0.642635566997913	0.459175513594191	0.98821050722751	CYP11A1	cg17736230	441	-1.3455588429442	0.455918371435407	0.990927793603041	TH	cg22546130	441	0.633500010211599	0.486566710362637	0.993106697966735	HSD11B2	cg18450270	441	0.356737809211982	0.486532512996992	0.990877270468319	DRD2	cg17220584	441	-0.495993550500725	0.390996984593964	0.890701987129576	HTR3A	cg25836326	441	-1.00747454884455	0.445373123599317	0.972507927733828	MC2R	cg09863950	441	0.553687168416144	0.439155304068087	0.98520383322641	HTR1E
cg05885577	441	-0.282619941414071	0.4592121974998	0.98821050722751	HTRA3	cg14418802	441	0.842856288429685	0.456540466301355	0.990927793603041	CYP11B1	cg16302441	441	0.329729256051547	0.487926682933997	0.993106697966735	HTR7	cg12457376	441	-1.12248272295785	0.487939278408068	0.990877270468319	DDC	cg02037013	441	-0.373398514207046	0.394742451678739	0.890701987129576	H6PD	cg10097150	441	0.392122603920876	0.445396823150033	0.972507927733828	FKBP5	cg19014730	441	0.570242737102433	0.440492840028677	0.98520383322641	DRD2
cg24164005	441	-0.499129696884484	0.459226358106178	0.98821050722751	CRHR1	cg19878200	441	0.351740440264608	0.457511067101687	0.990927793603041	AVPR1A	cg25446361	441	-0.359142452825024	0.490011290835126	0.993106697966735	CRHR1	cg08208133	441	-0.321253273930508	0.489170914613466	0.990877270468319	NR3C1	cg17637877	441	-0.562305896950035	0.394925596706708	0.890701987129576	DRD2	cg21644468	441	-0.664995516650178	0.445480159075032	0.972507927733828	SERPINA6	cg20941184	441	-0.519797995613262	0.440658834755086	0.98520383322641	HTR2A
cg05779523	441	0.239580432543336	0.459235281675458	0.98821050722751	HTRA3	cg13996731	441	-2.49260378222785	0.457817289866038	0.990927793603041	CRHR2	cg03565659	441	0.921200443767241	0.493894766950251	0.993106697966735	SRD5A2	cg16845257	441	0.391600756969505	0.49043124269128	0.990877270468319	HTRA1	cg07778819	441	0.384615901681133	0.394985812961158	0.890701987129576	DRD1	cg00666422	441	0.302876745399103	0.445828154875785	0.972507927733828	HTR6	cg12908660	441	-0.454304785279456	0.44114060715449	0.98520383322641	HTR5A
cg24108194	441	-1.96232495480173	0.460681133280281	0.98821050722751	CRHR1	cg06937024	441	2.95788378462667	0.459520401014176	0.990927793603041	PROP1	cg26948603	441	-1.29193841718159	0.498653893163404	0.993106697966735	COMT	cg00269606	441	0.201321464706558	0.492205198644732	0.990877270468319	HTR6	cg05952120	441	2.65729871705751	0.396282249221196	0.890701987129576	HTRA3	cg04091563	441	-0.274746343915396	0.447158928902033	0.972507927733828	POMC	cg16003049	441	-0.519611246873951	0.44157761604049	0.98520383322641	HTRA1
cg14855334	441	-2.36798904941305	0.461513046881386	0.98821050722751	HTR7	cg21633143	441	-2.15356778305329	0.460451201877934	0.990927793603041	SERPINA6	cg12577105	441	1.95096169903902	0.500035719300022	0.993106697966735	DDC	cg14059288	441	0.804653363132532	0.492749670323342	0.990877270468319	HTR5A	cg07733851	441	-1.20333705163251	0.396943276872963	0.890701987129576	NR3C1	cg00310588	441	-0.605971384761977	0.449274267988476	0.972507927733828	HSD11B1	cg23365637	441	-2.20816850759808	0.444763742421864	0.98520383322641	ACE
cg03216867	441	-0.415564925343346	0.462465769777838	0.98821050722751	POMC	cg25924472	441	-0.179510734987456	0.462822234599661	0.990927793603041	MC4R	cg25150846	441	0.281484764206843	0.501529242300227	0.993106697966735	SLC6A4	cg20629239	441	0.92820977980543	0.494565803434723	0.990877270468319	TPH2	cg18019515	441	7.00379202829052	0.400731111458146	0.891451120153716	TPH1	cg05939495	441	1.03187454091086	0.452818190006077	0.972507927733828	NR3C2	cg00967901	441	-2.4124346628938	0.445150220242668	0.98520383322641	TBX19
cg13094036	441	0.319069983931499	0.4625351416487	0.98821050722751	LEP	cg11712482	441	0.632951904560771	0.464188342297254	0.990927793603041	HTR5A	cg03216867	441	-0.491467969758146	0.501717052792937	0.993106697966735	POMC	cg12639324	441	-1.57554683527003	0.49459276686338	0.990877270468319	DDC	cg09863950	441	0.747021161917485	0.400965538538668	0.891451120153716	HTR1E	cg07501070	441	0.715481832384436	0.457957025450451	0.972507927733828	DRD1	cg21657705	441	-0.504975961827837	0.44652316935932	0.98520383322641	SERPINA6
cg25535999	441	0.37740976947475	0.463308072691125	0.98821050722751	SLC6A4	cg00335286	441	0.356925208784866	0.464501787979863	0.990927793603041	H6PD	cg01294490	441	1.03008773137348	0.50279599251572	0.993106697966735	H6PD	cg06937024	441	2.27251547682663	0.49695063001379	0.990877270468319	PROP1	cg25150846	441	0.517322653971703	0.402679724003183	0.891451120153716	SLC6A4	cg17030679	441	-0.834817889582548	0.458057196745759	0.972507927733828	HTRA1	cg20981893	441	-1.24461438633124	0.446858858574827	0.98520383322641	HTR2A
cg21881537	441	-0.605034129557336	0.469197087084872	0.98821050722751	CYP11A1	cg21644468	441	0.426020355781473	0.465156176178555	0.990927793603041	SERPINA6	cg17647537	441	-0.20908786044079	0.503049116333171	0.993106697966735	TH	cg18954700	441	2.71831568846003	0.506195472167766	0.990877270468319	DRD2	cg26464411	441	-2.69057550205376	0.402886806973645	0.891451120153716	AVP	cg01330016	441	-2.14832046010738	0.460997879520097	0.972507927733828	H6PD	cg24661173	441	0.377169057556507	0.447639817714283	0.98520383322641	ACE
cg23809645	441	-0.279085002404784	0.470403125766297	0.98821050722751	SLC6A4	cg12440040	441	-0.200881663337983	0.465591537514432	0.990927793603041	LEP	cg20423536	441	-0.545080598453502	0.504432495570381	0.993106697966735	TPH2	cg10777103	441	1.50857479668525	0.50640039150099	0.990877270468319	HTR5A	cg11916054	441	-0.934541754567058	0.406129831001319	0.891451120153716	HTR5A	cg26741280	441	-2.01658423554017	0.461025458010484	0.972507927733828	COMT	cg04923928	441	0.409177183339247	0.447775663229421	0.98520383322641	HTRA3
cg11361387	441	0.472503426185489	0.47138474711835	0.98821050722751	DDC	cg03721064	441	2.73831267884883	0.468731115048569	0.990927793603041	DHRS9	cg13857519	441	0.320688792878083	0.506279414523372	0.993106697966735	HTR5A	cg21013206	441	0.318105981758612	0.510894699419219	0.990877270468319	HTR2A	cg01804500	441	-2.45452409049042	0.406659577912432	0.891451120153716	H6PD	cg08586216	441	-5.26696374858933	0.463624162811982	0.972507927733828	NR3C1	cg11990309	441	0.250039709670308	0.448103270709286	0.98520383322641	CYP3A4
cg27528351	441	0.398206775389576	0.47196252915068	0.98821050722751	COMT	cg14174946	441	-0.215818064490977	0.469445041153156	0.990927793603041	DDC	cg04768425	441	0.300927542249503	0.50669375091499	0.993106697966735	NR3C2	cg04750517	441	-1.34718911295416	0.512494931493389	0.990877270468319	HTRA3	cg18755984	441	0.508712371244503	0.407281228301035	0.891451120153716	TH	cg03024742	441	-0.361302653604243	0.464668095489974	0.972507927733828	SRD5A2	cg01732037	441	0.458723729802486	0.450144587966007	0.98520383322641	H6PD
cg01294490	441	0.841988183622445	0.474570061287347	0.98821050722751	H6PD	cg26741280	441	1.31240977672675	0.469554040580893	0.990927793603041	COMT	cg03472798	441	0.97220451320478	0.50692756207001	0.993106697966735	POMC	cg12966915	441	-1.914180261192	0.512871056045432	0.990877270468319	LEP	cg18640030	441	0.342740216355585	0.409013721409968	0.891451120153716	HTR3B	cg17220584	441	-0.438760525122827	0.465206993780873	0.972507927733828	HTR3A	cg18584905	441	-2.92010798282134	0.453200688002524	0.98520383322641	TH
cg10741760	441	0.16339124569684	0.474626652309419	0.98821050722751	LEP	cg03843951	441	0.501332124366497	0.470059822016819	0.990927793603041	POMC	cg04632887	441	-0.901871655570746	0.511240965232932	0.993106697966735	HTRA3	cg13499155	441	0.227526410291789	0.51296580493311	0.990877270468319	HTR5A	cg07760722	441	-1.54640275476423	0.413798188104343	0.891451120153716	HTR4	cg11438011	441	0.26740796636821	0.468007256066097	0.972507927733828	CRHR2	cg26022526	441	3.11144578906713	0.453217800197613	0.98520383322641	MC2R
cg03721064	441	1.99186810706725	0.47832186208919	0.98821050722751	DHRS9	cg12457376	441	-1.37482023264376	0.470533509825849	0.990927793603041	DDC	cg23329208	441	-0.342146777709295	0.511643235551986	0.993106697966735	SLC6A4	cg00629244	441	2.19679256954513	0.513185710067657	0.990877270468319	HTR6	cg01926269	441	1.80800813802081	0.416376526080817	0.891451120153716	H6PD	cg01845356	441	0.590973826951115	0.469078839340907	0.972507927733828	H6PD	cg16830379	441	-0.53270546691188	0.45421290174231	0.98520383322641	HTRA1
cg10847032	441	0.117864118584104	0.480951119004313	0.98821050722751	HTR5A	cg09797446	441	0.325723259665819	0.471462172062391	0.990927793603041	HTR1E	cg24718866	441	0.74281862606686	0.514486562897248	0.993106697966735	PRKAR1A	cg18603538	441	0.361994310951603	0.518133545754041	0.990877270468319	HTR3B	cg04923928	441	0.528992621964269	0.416501947368906	0.891451120153716	HTRA3	cg26274946	441	-2.32568012768163	0.470353524738361	0.972507927733828	AVP	cg01294490	441	1.40465372185124	0.454932373562373	0.98520383322641	H6PD
cg23612570	441	-0.334546789589791	0.482071744946329	0.98821050722751	PRKAR1A	cg26274946	441	-1.55287060694899	0.471712257906089	0.990927793603041	AVP	cg26638505	441	-0.181253866428246	0.515299576405147	0.993106697966735	COMT	cg16332610	441	-1.24477970214232	0.5196435693729	0.990877270468319	HTR7	cg13232821	441	-0.7957964636535	0.418346187500062	0.891451120153716	LEP	cg07648740	441	0.962019512294136	0.471739648162384	0.972507927733828	HTR4	cg19303305	441	0.688836511726064	0.45784911085448	0.98520383322641	TH
cg26656751	441	-0.383602211104235	0.48405278035893	0.98821050722751	COMT	cg18226539	441	0.433943221543354	0.472009122771094	0.990927793603041	HTR3A	cg04360210	441	-0.500039584699427	0.52233425146171	0.993106697966735	DRD3	cg07075299	441	-0.989528839414654	0.519833519817678	0.990877270468319	NR3C1	cg09863441	441	1.4631921356119	0.418449573318649	0.891451120153716	FKBP5	cg23549160	441	2.43409446154445	0.474269145955168	0.972507927733828	PRKAR1A	cg19107055	441	0.520906894845623	0.458827312604019	0.98520383322641	HTR3B
cg18773129	441	-0.841259855209143	0.484401857910975	0.98821050722751	TH	cg00140191	441	-2.07476318371782	0.472231661317182	0.990927793603041	HTR6	cg09916783	441	-0.475431617994061	0.522457756782297	0.993106697966735	FKBP5	cg26638505	441	-0.155329508991585	0.522124402660943	0.990877270468319	COMT	cg12457376	441	-2.25183348513558	0.418618236933342	0.891451120153716	DDC	cg16003049	441	-0.627461559094394	0.474850547123477	0.972507927733828	HTRA1	cg13245440	441	0.361671982201916	0.45984546327474	0.98520383322641	DDC
cg00674304	441	1.1622133317737	0.486121729138645	0.98821050722751	H6PD	cg04422019	441	0.688612875431826	0.473799856216285	0.990927793603041	DRD3	cg00923860	441	-0.491523902874106	0.523610112689176	0.993106697966735	H6PD	cg09797446	441	0.24128153262549	0.522840257315767	0.990877270468319	HTR1E	cg19715936	441	2.18753196292909	0.419133276506685	0.891451120153716	TH	cg07545640	441	-4.80529539587661	0.47579485165787	0.972507927733828	NR3C1	cg04087608	441	-0.712892133224654	0.460344105237605	0.98520383322641	POMC
cg24257309	441	0.482707754248861	0.486346331270802	0.98821050722751	CRHR1	cg23365637	441	-1.68848268827537	0.474874365202633	0.990927793603041	ACE	cg09527270	441	-0.301908120652071	0.523782511512719	0.993106697966735	FKBP5	cg25535999	441	0.373670633981439	0.523603846573479	0.990877270468319	SLC6A4	cg08852963	441	0.9480561181474	0.419574945263514	0.891451120153716	NR3C1	cg21094739	441	-0.800762156714677	0.476474102772177	0.972507927733828	HTR2A	cg13251292	441	-0.310232574451081	0.46047570466017	0.98520383322641	DDC
cg10913456	441	-2.56632738729446	0.486515856720321	0.98821050722751	CRHR2	cg11491381	441	-1.56934051994419	0.475540823565123	0.990927793603041	AKR1D1	cg18773997	441	-0.373489696214013	0.524876832449463	0.993106697966735	DRD2	cg06346307	441	0.498767911764365	0.525543002796968	0.990877270468319	HTR4	cg12598837	441	-1.4642523652487	0.42018754269019	0.891451120153716	DDC	cg19457823	441	-0.573267242354294	0.477448464676367	0.972507927733828	TH	cg21224972	441	0.333681759296559	0.462482870993417	0.986235970602618	HTR2A
cg08636224	441	1.26674803384756	0.488982704117879	0.98821050722751	SRD5A1	cg20981893	441	0.98404713096011	0.475615771896265	0.990927793603041	HTR2A	cg24525872	441	3.35107572976761	0.525749445717492	0.993106697966735	CRHR1	cg12583095	441	-1.00631768392397	0.525676445834663	0.990877270468319	LEP	cg21478490	441	0.51559412706671	0.4246829971777	0.891451120153716	SERPINA6	cg04278702	441	0.539258908524522	0.478674503774747	0.972507927733828	POU1F1	cg05912121	441	-0.360414894979116	0.4662096936647	0.986235970602618	NR3C2
cg07863439	441	0.999749912257218	0.491127432536963	0.98821050722751	NR3C1	cg08372315	441	0.460961071133757	0.475621475061588	0.990927793603041	NR3C1	cg08030082	441	0.408582469549927	0.52597544732287	0.993106697966735	PROP1	cg24164005	441	-0.486937183515234	0.525786474460036	0.990877270468319	CRHR1	cg24108194	441	-4.14400693331161	0.425238300323734	0.891451120153716	CRHR1	cg16692923	441	-1.06017639458121	0.47897662982047	0.972507927733828	CYP17A1	cg06941869	441	0.429450862596438	0.466528111190053	0.986235970602618	SRD5A1
cg19502744	441	-0.10973324957445	0.491221537744475	0.98821050722751	DRD2	cg00840332	441	0.203885159549374	0.478692120308773	0.990927793603041	H6PD	cg20981893	441	-0.855120619828185	0.526098419649065	0.993106697966735	HTR2A	cg27640254	441	-0.37562397464667	0.530941523340463	0.990877270468319	COMT	cg04900872	441	-0.701113521114266	0.426048791451628	0.891451120153716	HTRA3	cg04443360	441	0.492864645832773	0.480783009647489	0.972507927733828	HTR3C	cg17095936	441	0.275845011302543	0.470153484649268	0.986235970602618	HTR7
cg22614355	441	-0.789424169793975	0.4920984064663	0.98821050722751	HSD11B2	cg16692923	441	0.691475248743022	0.479907702589425	0.990927793603041	CYP17A1	cg23027580	441	-1.47700606178909	0.527297447800398	0.993106697966735	HSD11B2	cg09863950	441	0.324887087305101	0.5327039946338	0.990877270468319	HTR1E	cg27208536	441	0.656956007541683	0.426864802074856	0.891451120153716	COMT	cg25103337	441	0.689358805761734	0.48108579655907	0.972507927733828	ACE	cg22546130	441	-0.78944615879818	0.470504355577154	0.986235970602618	HSD11B2
cg12751005	441	0.581108415820799	0.495602411944423	0.98821050722751	DDC	cg18450270	441	0.436917643160185	0.480329934217999	0.990927793603041	DRD2	cg20140452	441	1.18600881898159	0.527428266732595	0.993106697966735	TPH2	cg03024742	441	-0.170423070138553	0.534363645139242	0.990877270468319	SRD5A2	cg24934431	441	-1.08142674812707	0.42693871075616	0.891451120153716	ACE	cg18595639	441	2.04211577619294	0.484013759749207	0.972507927733828	DRD2	cg04856689	441	1.12876759180757	0.470669836974405	0.986235970602618	NR3C2
cg00666422	441	0.133640605287581	0.495824227917723	0.98821050722751	HTR6	cg05951817	441	0.438185993764735	0.481680981019136	0.990927793603041	NR3C2	cg04987827	441	2.94369249411956	0.529708888990865	0.993106697966735	NR3C2	cg08700190	441	0.27755431647915	0.535645543216842	0.990877270468319	PROP1	cg11491381	441	2.01708071516198	0.427355201816129	0.891451120153716	AKR1D1	cg06457577	441	-2.38401589502581	0.484456510963095	0.972507927733828	DRD1	cg13000004	441	-0.749273948139426	0.472317518264724	0.986235970602618	DDC
cg23027580	441	-1.21767497131605	0.496291946509842	0.98821050722751	HSD11B2	cg20991421	441	-0.375840238834739	0.484670168513529	0.990927793603041	HTR2A	cg25271841	441	0.219945843290451	0.529749010900301	0.993106697966735	CRHR1	cg02299946	441	1.26723352167823	0.538294214244233	0.990877270468319	POMC	cg08569242	441	-4.58028576529095	0.427653358389044	0.891451120153716	HTR4	cg16302441	441	-0.515025699983164	0.489470229580917	0.972507927733828	HTR7	cg10686375	441	-3.82745490461752	0.477623895314937	0.986235970602618	HTR1E
cg16692923	441	0.487423885101955	0.498609584132359	0.98821050722751	CYP17A1	cg27549720	441	0.383163623262396	0.484852843269449	0.990927793603041	COMT	cg11491381	441	1.02081200135701	0.530669279095513	0.993106697966735	AKR1D1	cg15189567	441	0.539815815972915	0.538764685761421	0.990877270468319	HTRA1	cg14059288	441	-1.62838731179596	0.428977278734081	0.891451120153716	HTR5A	cg02937158	441	-0.640564890488454	0.490227403302794	0.972507927733828	POMC	cg01581781	441	-0.308438632052242	0.480616000513126	0.986235970602618	TBX19
cg00967901	441	-1.3551039525666	0.499085435592551	0.98821050722751	TBX19	cg05779523	441	0.308395214892024	0.484881082912219	0.990927793603041	HTRA3	cg20709110	441	-0.355152605624452	0.532425124733508	0.993106697966735	HTR2A	cg16536918	441	-0.838181486267647	0.54132908526148	0.990877270468319	HTRA1	cg15607306	441	0.572231682406747	0.429014700532275	0.891451120153716	HTRA1	cg05437692	441	0.779226586151013	0.490506463050354	0.972507927733828	NR3C2	cg01620540	441	0.33059218435631	0.480993507177046	0.986235970602618	HTR6
cg14094793	441	0.978815748692028	0.49998798157299	0.98821050722751	HTR5A	cg22827011	441	0.205324370286676	0.486687619737209	0.990927793603041	HSD11B2	cg25551168	441	-0.602624361580956	0.537615532014465	0.993106697966735	MC2R	cg13373360	441	0.575775690762261	0.543231731449474	0.990877270468319	AKR1D1	cg24718866	441	-1.38618399254761	0.429979820182839	0.891451120153716	PRKAR1A	cg11845071	441	3.7469695998676	0.492488133815771	0.972507927733828	CRHR2	cg02579332	441	0.236604279076227	0.482241669461233	0.986235970602618	SRD5A2
cg27068143	441	-0.254282486352302	0.500408702923333	0.98821050722751	COMT	cg00603617	441	3.00329922740569	0.490686139286797	0.990927793603041	H6PD	cg18529845	441	-0.102247914962006	0.538577964920752	0.993106697966735	TH	cg16692923	441	0.497378964367256	0.543553846403728	0.990877270468319	CYP17A1	cg15140722	441	-0.376325021106661	0.433938059959354	0.896511275651951	HTRA1	cg00923860	441	-0.802233379663452	0.493338653521669	0.972507927733828	H6PD	cg21191514	441	0.252780325683207	0.484277892302251	0.986235970602618	HTR2A
cg01274715	441	-0.922060182889467	0.500645965427266	0.98821050722751	HTR6	cg08915438	441	0.725080864291529	0.491060514748406	0.990927793603041	HTR4	cg20753294	441	-0.7477508365194	0.53963242971059	0.993106697966735	HTR2A	cg08241694	441	-0.343806386433855	0.546241108003686	0.990877270468319	DRD1	cg08791953	441	0.426552293016957	0.435902274261898	0.896511275651951	NR3C1	cg18283321	441	-0.895739792096408	0.493341974032758	0.972507927733828	HTR3A	cg07425204	441	0.640048021241807	0.484297605334113	0.986235970602618	HTR4
cg23185751	441	-0.255218816341589	0.502673720855261	0.98821050722751	CRHR1	cg24922596	441	0.296337849924214	0.492574943856196	0.990927793603041	ACE	cg04424630	441	2.03522624119353	0.540119082899502	0.993106697966735	HTR3C	cg00078348	441	0.227062763188879	0.548625542095795	0.990877270468319	TBX19	cg08033551	441	1.05183004509702	0.436837604706666	0.896511275651951	NR3C1	cg15692052	441	0.824406250858029	0.494334615770594	0.972507927733828	CYP17A1	cg11845071	441	2.96567034887496	0.485547714462729	0.986235970602618	CRHR2
cg05912121	441	0.211685031916449	0.502980181370171	0.98821050722751	NR3C2	cg04091563	441	-0.165881207413988	0.492650459395286	0.990927793603041	POMC	cg00310588	441	0.308099679251597	0.540340907160534	0.993106697966735	HSD11B1	cg22584138	441	0.305864249829629	0.548710829266054	0.990877270468319	HSD11B2	cg12440040	441	0.308795399534155	0.437292864074797	0.896511275651951	LEP	cg22614355	441	-1.60859663882605	0.494603433768099	0.972507927733828	HSD11B2	cg06020661	441	0.581189927180977	0.485726381744295	0.986235970602618	HTRA3
cg09201719	441	-1.68651141156496	0.503857096478033	0.98821050722751	HTR1E	cg18283321	441	-0.592609472001185	0.493233903041468	0.990927793603041	HTR3A	cg02299946	441	1.43909463460086	0.540500848591569	0.993106697966735	POMC	cg03721064	441	1.91082892539841	0.549709538724771	0.990877270468319	DHRS9	cg14349956	441	2.33380440326809	0.439686589110369	0.897186368009615	CRH	cg21141047	441	2.77113300874837	0.49762541513881	0.972507927733828	HTR2A	cg13748928	441	1.41685504497185	0.485757132826686	0.986235970602618	DDC
cg24026230	441	0.102702329642046	0.503972382038467	0.98821050722751	PRKAR1A	cg01620540	441	0.276965757224509	0.4936001300575	0.990927793603041	HTR6	cg25054907	441	-1.83517164540587	0.541452460086687	0.993106697966735	CRHR1	cg00603617	441	2.16692529103525	0.551635305426162	0.990877270468319	H6PD	cg18147569	441	3.82477260367725	0.440243828582468	0.897186368009615	DRD2	cg02579332	441	0.294807271266802	0.498152281191797	0.972507927733828	SRD5A2	cg04856117	441	-0.833751382918254	0.486508503538655	0.986235970602618	NR3C2
cg16642545	441	0.233123540636711	0.504230250919883	0.98821050722751	HTRA1	cg17095936	441	-0.223569694451069	0.49372990040224	0.990927793603041	HTR7	cg09361691	441	0.488102260404073	0.541555288957225	0.993106697966735	HTR1E	cg00454577	441	0.980677469626687	0.552917107880347	0.990877270468319	TBX19	cg00140191	441	-3.20934964820221	0.442162908612398	0.897186368009615	HTR6	cg00615746	441	0.390294445102831	0.499354994496861	0.972507927733828	HSD11B1	cg25394652	441	2.82115329205674	0.487876733347368	0.986235970602618	CRHR1
cg12807275	441	-0.253364187879292	0.504773509020677	0.98821050722751	DDC	cg03560973	441	0.447882980213204	0.494407524560029	0.990927793603041	SRD5A2	cg16642545	441	0.279235348999215	0.541783460706458	0.993106697966735	HTRA1	cg05082563	441	0.268976082301892	0.555988618394702	0.990877270468319	HTRA3	cg18529845	441	0.197223233259653	0.442498167917786	0.897186368009615	TH	cg08894761	441	0.222316083039951	0.50027371955417	0.972507927733828	DRD1	cg12457376	441	-1.56916878122603	0.488145918762536	0.986235970602618	DDC
cg23913482	441	-1.4503021603474	0.504777898512062	0.98821050722751	CRHR1	cg17030679	441	0.507370919630557	0.495800192805911	0.990927793603041	HTRA1	cg00107488	441	-0.454013641783384	0.542272970567726	0.993106697966735	H6PD	cg11157691	441	-0.281023143365551	0.558736568568449	0.990877270468319	LEP	cg20647137	441	0.464155704493315	0.444796977461079	0.899369712668556	TPH2	cg02577436	441	1.71656580582608	0.500348177823867	0.972507927733828	DHRS9	cg03084214	441	0.355615284403699	0.489870030661291	0.986235970602618	POMC
cg04750517	441	-1.20288636662763	0.50566115251762	0.98821050722751	HTRA3	cg24353392	441	-0.693723839160903	0.496616214693003	0.990927793603041	PRKAR1A	cg07545640	441	-2.63990195083892	0.54237712067282	0.993106697966735	NR3C1	cg00674304	441	1.10428657806084	0.558935551051043	0.990877270468319	H6PD	cg10025865	441	0.350585244851639	0.446254976307197	0.899837141336385	HTR1E	cg00852398	441	0.592263644568949	0.50300730854399	0.972507927733828	HTR6	cg11298960	441	0.484223143690163	0.490224631914098	0.986235970602618	DDC
cg26969596	441	0.187419611153454	0.50686958038585	0.98821050722751	COMT	cg07061368	441	-0.510359588024774	0.499369270005375	0.990927793603041	NR3C1	cg23851685	441	0.280115514356621	0.544307906759922	0.993106697966735	PRKAR1A	cg23851685	441	0.23621221590884	0.559175223722924	0.990877270468319	PRKAR1A	cg23951474	441	0.608579353727854	0.449572810388618	0.899837141336385	CRHR1	cg20709110	441	-0.595621298962977	0.503537249205581	0.972507927733828	HTR2A	cg02276314	441	-0.691151586787217	0.493293989357881	0.986235970602618	DHRS9
cg12598837	441	0.610785964293282	0.509574004857711	0.98821050722751	DDC	cg12516059	441	0.135172767420142	0.499849793240221	0.990927793603041	HTR5A	cg09201719	441	-1.99766135123018	0.544664695243315	0.993106697966735	HTR1E	cg00610228	441	1.77512686799168	0.560022510103003	0.990877270468319	H6PD	cg14127947	441	0.584178052666065	0.451536255480765	0.899837141336385	AKR1D1	cg05779523	441	0.43712673271058	0.505072916386445	0.972507927733828	HTRA3	cg09201719	441	-2.70410410572864	0.495130682356607	0.986235970602618	HTR1E
cg00269606	441	0.168935414316576	0.510468787132567	0.98821050722751	HTR6	cg21878188	441	-2.85470879965506	0.50380157785842	0.990927793603041	CYP11A1	cg19628225	441	0.2757178472442	0.544743127469178	0.993106697966735	TH	cg07194846	441	0.279996316754481	0.561731888587444	0.990877270468319	SRD5A1	cg18847882	441	1.5383408159241	0.454368386583745	0.899837141336385	DRD2	cg26880525	441	1.13842674820444	0.505782572438565	0.972507927733828	COMT	cg25725890	441	-2.90731767782902	0.497127182424126	0.986235970602618	MC2R
cg15971888	441	0.885895457328352	0.511466822775634	0.98821050722751	HTRA1	cg05939993	441	-0.381667696523184	0.5045711562341	0.990927793603041	HTRA3	cg26464411	441	-1.30070577494024	0.546228948154258	0.993106697966735	AVP	cg18226539	441	0.292527501125809	0.561937181861743	0.990877270468319	HTR3A	cg00923860	441	0.84490421808684	0.455270130064841	0.899837141336385	H6PD	cg19194405	441	1.25207995482451	0.507894425728523	0.972507927733828	TH	cg25551168	441	0.801740303854008	0.49761063214298	0.986235970602618	MC2R
cg14809166	441	-0.249260684037414	0.512371323480018	0.98821050722751	CRH	cg15719652	441	-0.605502135057548	0.505781033352011	0.990927793603041	HTR7	cg17030679	441	-0.424455581916835	0.547482725654658	0.993106697966735	HTRA1	cg03216867	441	-0.370254415890322	0.564375381919776	0.990877270468319	POMC	cg19303305	441	0.850459349406169	0.457370624498686	0.899837141336385	TH	cg21713424	441	4.07252643106227	0.508217334056331	0.972507927733828	CYP11A1	cg00562879	441	2.06056562386028	0.498254435107575	0.986235970602618	H6PD
cg23532924	441	0.228540273228085	0.513010464521272	0.98821050722751	ACE	cg09495977	441	1.68827121111305	0.509150838653599	0.990927793603041	FKBP5	cg13521908	441	-1.32541306336106	0.54779871461235	0.993106697966735	DDC	cg10288772	441	1.14870360472328	0.564547608346796	0.990877270468319	FKBP5	cg21644468	441	0.611817860481232	0.458414346357731	0.899837141336385	SERPINA6	cg06020661	441	0.700897104037944	0.51321098663733	0.972507927733828	HTRA3	cg14174946	441	0.235232612416846	0.503729406749367	0.986235970602618	DDC
cg12782180	441	-0.229852925840733	0.514037327077152	0.98821050722751	CRHR2	cg18233497	441	0.149499114727502	0.51188920510902	0.990927793603041	TPH1	cg27528351	441	0.433009987368663	0.548564503964381	0.993106697966735	COMT	cg20178075	441	0.171403777937152	0.566308594182481	0.990877270468319	AVPR1A	cg05723130	441	-3.37630888405557	0.45922265028338	0.899837141336385	HTRA3	cg09201719	441	-3.35868329497811	0.513736792813647	0.972507927733828	HTR1E	cg06961323	441	-0.433144698406942	0.504305829339253	0.986235970602618	PROP1
cg21330703	441	0.970058288385603	0.514452072802385	0.98821050722751	SERPINA6	cg24718866	441	0.742901833362689	0.512131014359284	0.990927793603041	PRKAR1A	cg22458194	441	1.54331448700979	0.548601212127294	0.993106697966735	CYP11A1	cg00335286	441	0.233076111835074	0.566702487414739	0.990877270468319	H6PD	cg14847514	441	-0.903041289210463	0.462434104720391	0.899837141336385	HTRA1	cg03974204	441	-1.1197987800165	0.514963935522979	0.972507927733828	SRD5A2	cg09495977	441	1.98814171713578	0.505649953582489	0.986235970602618	FKBP5
cg07545640	441	-2.15594623262387	0.517909793997545	0.98821050722751	NR3C1	cg05506829	441	1.21520784744926	0.512898828618458	0.990927793603041	HTRA3	cg25736198	441	-0.752954031104222	0.549208049729587	0.993106697966735	MC2R	cg19107055	441	-0.291120241684492	0.567891090653902	0.990877270468319	HTR3B	cg23974739	441	0.598917303890207	0.464986686969925	0.899837141336385	ACE	cg14149680	441	0.382030035420568	0.516794225701847	0.972507927733828	HTR5A	cg23532924	441	0.365349269200008	0.506378063807067	0.986235970602618	ACE
cg06860277	441	0.379947391354022	0.519513647487432	0.98821050722751	NR3C1	cg26321066	441	-0.261617566557384	0.516743905701171	0.990927793603041	AVP	cg24934431	441	-0.541225029223544	0.549502681746927	0.993106697966735	ACE	cg24661173	441	0.205578405420809	0.569394973088884	0.990877270468319	ACE	cg24610236	441	0.691788699710979	0.468174885153236	0.899837141336385	ACE	cg15910486	441	-2.01667242722848	0.517236108619652	0.972507927733828	HTRA1	cg11916054	441	-0.603928257526026	0.507229842003268	0.986235970602618	HTR5A
cg14558428	441	0.0936061941424421	0.522830383899779	0.98821050722751	CRH	cg18442632	441	0.361918816964467	0.518750736924472	0.990927793603041	TH	cg11150353	441	-1.27413978782526	0.550374037617496	0.993106697966735	DDC	cg07528216	441	-0.261119708559743	0.571269910460836	0.990877270468319	NR3C1	cg00307530	441	-0.83585820194275	0.468454466336664	0.899837141336385	HSD3B2	cg05885577	441	0.533161808526671	0.518545798345163	0.972507927733828	HTRA3	cg09798090	441	0.352963776808516	0.507583289870155	0.986235970602618	HTR1E
cg16586394	441	-0.41482182263224	0.522876185494996	0.98821050722751	HTRA1	cg23974739	441	0.373365116129885	0.52245167790887	0.990927793603041	ACE	cg27345592	441	-0.593720674466334	0.552042135156841	0.993106697966735	COMT	cg13996731	441	-1.55874882010461	0.573365951341447	0.990877270468319	CRHR2	cg00363114	441	-0.552037629272018	0.470882952424503	0.899837141336385	HSD11B1	cg18068240	441	-5.12115494866399	0.518627406302436	0.972507927733828	TH	cg18442632	441	0.423824297235443	0.508681015554042	0.986235970602618	TH
cg22812013	441	-0.462238324013664	0.523533287057807	0.98821050722751	HSD11B2	cg18603538	441	0.423442001881029	0.525595307428199	0.990927793603041	HTR3B	cg22391185	441	1.40949109409572	0.552185709296391	0.993106697966735	CYP11A1	cg12516059	441	0.0934944745801034	0.574155434553686	0.990877270468319	HTR5A	cg19802564	441	0.502013397561226	0.473109918382038	0.899837141336385	TPH2	cg10185667	441	-2.24669010370146	0.518921057697559	0.972507927733828	HTR1E	cg18450270	441	-0.467889537213496	0.509660944589417	0.986235970602618	DRD2
cg09920557	441	-1.82322303133153	0.530526724797361	0.98821050722751	HTR1E	cg27503360	441	-0.590207709041198	0.526463532982266	0.990927793603041	COMT	cg15615793	441	0.262814473452269	0.552424546559792	0.993106697966735	HTRA1	cg12440040	441	-0.128375748415851	0.576065520305178	0.990877270468319	LEP	cg04856689	441	1.38269355684206	0.475101963914891	0.899837141336385	NR3C2	cg06623827	441	-0.4976452613045	0.520557943867112	0.972507927733828	HTR4	cg00363114	441	-0.404982202460399	0.513106121660633	0.986235970602618	HSD11B1
cg02508664	441	-0.268212960998501	0.531932306737294	0.98821050722751	HTR2B	cg00269606	441	0.220674009157716	0.530599396547757	0.990927793603041	HTR6	cg01819552	441	-0.244790721648316	0.55301784420459	0.993106697966735	H6PD	cg00308665	441	0.190270202942564	0.576688123301012	0.990877270468319	H6PD	cg05939495	441	0.931420956220527	0.475596329001927	0.899837141336385	NR3C2	cg18998365	441	0.55558028258304	0.520687607600727	0.972507927733828	TH	cg05779523	441	0.336706127081744	0.513231455733844	0.986235970602618	HTRA3
cg14402224	441	0.388312461511451	0.53326156739803	0.98821050722751	CRH	cg12816057	441	0.272485201058781	0.531004601852482	0.990927793603041	DDC	cg11916054	441	-0.447919830072163	0.553894059003363	0.993106697966735	HTR5A	cg10468385	441	-0.311878904238777	0.576764442778495	0.990877270468319	HTR1E	cg13857519	441	0.508001863779688	0.479043123741933	0.899837141336385	HTR5A	cg20423536	441	-0.816250447190062	0.521138400557531	0.972507927733828	TPH2	cg01975877	441	1.83996270098222	0.514479122932173	0.986235970602618	H6PD
cg26638505	441	-0.13246113798501	0.534854074741892	0.98821050722751	COMT	cg22186216	441	0.433788708095407	0.532252424252498	0.990927793603041	CYP11A1	cg01804500	441	-1.20730403886829	0.555592003812766	0.993106697966735	H6PD	cg13781869	441	0.395797003729305	0.57739498883312	0.990877270468319	LEP	cg13000004	441	-0.901938110507297	0.481447223141829	0.899837141336385	DDC	cg19125767	441	0.66903774142955	0.523849526736964	0.972507927733828	DRD2	cg22442841	441	0.831475903501053	0.51679294051684	0.986235970602618	CYP11A1
cg04422019	441	-0.420743778921469	0.537189525103949	0.98821050722751	DRD3	cg03363743	441	0.434900893085576	0.532609673913966	0.990927793603041	SRD5A2	cg09672383	441	-0.185265957428332	0.557045774419339	0.993106697966735	FKBP5	cg04144768	441	0.473265310209378	0.579828594775201	0.990877270468319	HTR3C	cg08241694	441	0.682364410280367	0.481497482128248	0.899837141336385	DRD1	cg18847882	441	-1.38875685778843	0.524172591467435	0.972507927733828	DRD2	cg26321066	441	-0.298096880652214	0.517745642265356	0.986235970602618	AVP
cg06777002	441	1.25453098061278	0.53910144974329	0.98821050722751	PROP1	cg03056854	441	0.353421711277378	0.533082228969584	0.990927793603041	HTR2B	cg26966083	441	0.277377256290854	0.557156522995285	0.993106697966735	COMT	cg21671386	441	-0.49166016430376	0.580412392118245	0.990877270468319	SERPINA6	cg09714615	441	0.273698993608435	0.481878700335704	0.899837141336385	HTR1E	cg26135506	441	-3.55803914584146	0.524575791355585	0.972507927733828	AVP	cg10874403	441	-0.296686822113129	0.520407060279639	0.986235970602618	CRHR2
cg09318122	441	0.165395941989111	0.541134631928309	0.98821050722751	FKBP5	cg21671386	441	-0.660189150559417	0.533626281375439	0.990927793603041	SERPINA6	cg14754494	441	-0.389407536256377	0.557377923756075	0.993106697966735	CYP11B1	cg23532924	441	0.219769791481966	0.581123007066072	0.990877270468319	ACE	cg25780543	441	0.696493945468471	0.483970084372503	0.899837141336385	MC4R	cg09527270	441	-0.467322419208217	0.526391472013874	0.972507927733828	FKBP5	cg05506829	441	1.36481249156082	0.521215072282763	0.986235970602618	HTRA3
cg24134767	441	0.264776708591044	0.542435318985675	0.98821050722751	CRHR1	cg06521673	441	-2.78838829586023	0.53377849542035	0.990927793603041	DRD1	cg08400935	441	-0.471330966958951	0.557517212910636	0.993106697966735	NR3C1	cg20813374	441	0.349859151065066	0.581937374172172	0.990877270468319	HTR2A	cg08573687	441	0.287644370208146	0.487628665564836	0.899837141336385	SRD5A1	cg23169111	441	0.82768115524179	0.527031008662233	0.972507927733828	CRHR1	cg14065127	441	-0.531688743366209	0.521731933538097	0.986235970602618	LEP
cg01192538	441	-0.190499588558862	0.542910415144755	0.98821050722751	H6PD	cg23913482	441	-1.8338708434793	0.534584447448224	0.990927793603041	CRHR1	cg10025865	441	0.176189318971434	0.564333030933592	0.993106697966735	HTR1E	cg11338049	441	-0.807627074457239	0.582957228864174	0.990877270468319	DDC	cg15645634	441	-3.94205244706812	0.488579753958859	0.899837141336385	HTR7	cg21224972	441	-0.367355517591856	0.529138775026017	0.972507927733828	HTR2A	cg15926585	441	-0.386753560688071	0.521940881891342	0.986235970602618	CYP17A1
cg12793238	441	1.10005228588862	0.543934585547972	0.98821050722751	DDC	cg21960184	441	-0.208621079789391	0.535240363337306	0.990927793603041	CYP11A1	cg02037013	441	0.170304549631817	0.565270716232705	0.993106697966735	H6PD	cg02916102	441	-1.09540885452985	0.583758270275856	0.990877270468319	SRD5A2	cg26022526	441	3.55313745768794	0.489047715577351	0.899837141336385	MC2R	cg27579609	441	1.74173357259069	0.529403157870259	0.972507927733828	COMT	cg24877195	441	-1.75458979589969	0.524869165911736	0.986235970602618	ACE
cg12017635	441	0.24613057366582	0.544650023893217	0.98821050722751	DDC	cg15140722	441	-0.208478459109499	0.535923269176174	0.990927793603041	HTRA1	cg19125767	441	-0.384381090204554	0.565745563453545	0.993106697966735	DRD2	cg09527270	441	-0.226247862469392	0.584502948450689	0.990877270468319	FKBP5	cg21881537	441	1.14195934795055	0.489446279576555	0.899837141336385	CYP11A1	cg09318122	441	-0.346618253916743	0.529686031718212	0.972507927733828	FKBP5	cg27640254	441	0.533479529167248	0.524973494032863	0.986235970602618	COMT
cg16003049	441	-0.258447708257348	0.545783437781716	0.98821050722751	HTRA1	cg09394608	441	-0.454440444509382	0.536119436969102	0.990927793603041	FKBP5	cg10468385	441	-0.366317484438714	0.566184939281168	0.993106697966735	HTR1E	cg03279206	441	0.239770503926004	0.584784328960186	0.990877270468319	SRD5A2	cg00562879	441	2.58639700034926	0.490059492491778	0.899837141336385	H6PD	cg04750517	441	-2.26627320395748	0.530024050204835	0.972507927733828	HTRA3	cg19457823	441	-0.395777970052683	0.528178793814371	0.986235970602618	TH
cg03363743	441	0.307179645577494	0.548450314739894	0.98821050722751	SRD5A2	cg04493143	441	0.385716914029823	0.536782992712837	0.990927793603041	HTR3C	cg21164131	441	-0.152829982269976	0.567150817065341	0.993106697966735	HTR2A	cg15912040	441	0.712047193261711	0.584949854958479	0.990877270468319	HTRA1	cg19491599	441	0.580499878119401	0.491193035115995	0.899837141336385	DRD2	cg01926269	441	-1.49197165606	0.5323901298746	0.972507927733828	H6PD	cg17307280	441	2.18777604834049	0.528317705069248	0.986235970602618	HTR3A
cg09797446	441	0.199308699301799	0.548692744652932	0.98821050722751	HTR1E	cg00930194	441	0.279904016419356	0.537923641021509	0.990927793603041	TBX19	cg15912040	441	0.840267260793059	0.572580065410915	0.993106697966735	HTRA1	cg24134767	441	0.268779056140951	0.585919660981245	0.990877270468319	CRHR1	cg15003182	441	-0.85914033662853	0.493039835852825	0.899837141336385	HTRA1	cg11750900	441	-1.93979771295289	0.532448508240698	0.972507927733828	DDC	cg03721064	441	2.80814863689652	0.528428797734171	0.986235970602618	DHRS9
cg17015994	441	0.292932926178108	0.549161942153006	0.98821050722751	HTRA1	cg16642545	441	0.292258886390083	0.538700882351089	0.990927793603041	HTRA1	cg23035419	441	-0.645899332606628	0.57310637320219	0.993106697966735	HSD11B2	cg04087608	441	0.386581300758647	0.586616229058876	0.990877270468319	POMC	cg16811558	441	1.25635119553765	0.494701981486414	0.899837141336385	HTRA1	cg20178075	441	-0.332552922085382	0.533924426518212	0.972507927733828	AVPR1A	cg14791547	441	2.01720673580692	0.530048771445387	0.986235970602618	CYP11B1
cg26321066	441	-0.174917684383337	0.550717832305936	0.98821050722751	AVP	cg17723156	441	0.397079995543734	0.540463636652366	0.990927793603041	TH	cg02079741	441	-0.32258132630541	0.573422097011161	0.993106697966735	HSD11B1	cg19194405	441	-0.467305674501451	0.589567851608209	0.990877270468319	TH	cg04132288	441	0.555609437204875	0.495182991270086	0.899837141336385	DHRS9	cg08389266	441	-0.478646004852153	0.53418284032771	0.972507927733828	NR3C1	cg21240762	441	-3.32779275440368	0.532167568208757	0.986235970602618	HTR2A
cg11338049	441	-0.77166452246324	0.551598176609042	0.98821050722751	DDC	cg20629239	441	-1.00413732588413	0.541890153972899	0.990927793603041	TPH2	cg08241694	441	-0.366689775775679	0.573808779498619	0.993106697966735	DRD1	cg14754494	441	-0.309846987872694	0.589710131056045	0.990877270468319	CYP11B1	cg05912121	441	0.419226429704036	0.495831009728072	0.899837141336385	NR3C2	cg02318454	441	-0.412158332126112	0.534586611102672	0.972507927733828	POMC	cg21330703	441	1.48374814866054	0.532275508803625	0.986235970602618	SERPINA6
cg03843951	441	0.306206344693269	0.551655497624362	0.98821050722751	POMC	cg04566694	441	-0.46600580261015	0.54208290495609	0.990927793603041	HTRA3	cg11564670	441	-0.179737232872551	0.574349090839841	0.993106697966735	LEP	cg00923860	441	-0.358886644322569	0.591156082446823	0.990877270468319	H6PD	cg03565659	441	-1.40185654324662	0.49621668123611	0.899837141336385	SRD5A2	cg11338049	441	-1.61785632518211	0.537452005305335	0.972507927733828	DDC	cg24578679	441	-3.68737274925219	0.532991578929485	0.986235970602618	CRHR1
cg21633143	441	-1.28321763495052	0.553749946675254	0.98821050722751	SERPINA6	cg00615746	441	0.239364167274944	0.542098327805182	0.990927793603041	HSD11B1	cg14149680	441	0.204257186341004	0.578777201779948	0.993106697966735	HTR5A	cg15505103	441	0.191159325011644	0.591492449694474	0.990877270468319	HTRA1	cg11731737	441	-3.07715750823676	0.496319638440842	0.899837141336385	CRHR2	cg09122657	441	-4.2028338784494	0.538538047291215	0.972507927733828	HTR1E	cg24610236	441	0.490615256959845	0.534080949194699	0.986235970602618	ACE
cg18948125	441	-0.117019002129596	0.557943915288877	0.98821050722751	TH	cg10712173	441	-2.38076359410448	0.544953415273672	0.990927793603041	LEP	cg11423517	441	-0.256830341945628	0.579271790042528	0.993106697966735	DDC	cg05454635	441	0.558427508462893	0.591878786436546	0.990877270468319	HTRA3	cg19628225	441	0.461581596862772	0.498617742926148	0.899837141336385	TH	cg10777103	441	-2.60213775190029	0.53998953030367	0.972507927733828	HTR5A	cg14692377	441	-1.76773323232992	0.535293851555497	0.986235970602618	CRH
cg20941184	441	-0.249754882602736	0.560382901909004	0.98821050722751	HTR2A	cg03176729	441	-0.281926919905971	0.547117235601113	0.990927793603041	SRD5A2	cg08845721	441	0.397163155499501	0.579564526721499	0.993106697966735	PROP1	cg05779523	441	0.196857081515029	0.594050586214397	0.990877270468319	HTRA3	cg01489398	441	-0.603483595496134	0.499567074747852	0.899837141336385	TBX19	cg07843056	441	-3.25846894332605	0.542268151777892	0.972507927733828	SRD5A1	cg12248358	441	0.39494081468119	0.537235425293681	0.986235970602618	HTR5A
cg16012111	441	-1.33010529747969	0.562703779112683	0.98821050722751	HTRA1	cg09916783	441	0.463336771873894	0.548262871001773	0.990927793603041	FKBP5	cg23365637	441	0.988765843742047	0.579645337531771	0.993106697966735	ACE	cg13175282	441	0.580166648578915	0.594098304718775	0.990877270468319	DDC	cg24922596	441	-0.409591584052744	0.500286912198803	0.899837141336385	ACE	cg12583095	441	-1.69844343450531	0.549460786317047	0.972507927733828	LEP	cg04471890	441	1.5115430318398	0.537509733393661	0.986235970602618	DRD3
cg25836326	441	0.363164507045331	0.56566433245356	0.98821050722751	MC2R	cg16586394	441	-0.527956432878438	0.551098529949383	0.990927793603041	HTRA1	cg24922596	441	0.225383153595969	0.579929219691836	0.993106697966735	ACE	cg11712482	441	0.384142965617201	0.59448416548661	0.990877270468319	HTR5A	cg21683009	441	-4.57159596746757	0.502048044432473	0.899837141336385	SERPINA6	cg09798090	441	0.408002470123276	0.549520089913812	0.972507927733828	HTR1E	cg22827011	441	0.207781842614736	0.539340894137268	0.986235970602618	HSD11B2
cg24610236	441	0.28163022006687	0.567225583814813	0.98821050722751	ACE	cg09672383	441	0.195936570716637	0.551874836942019	0.990927793603041	FKBP5	cg19802564	441	-0.259212898623611	0.580276718255313	0.993106697966735	TPH2	cg10335743	441	-0.286398916771028	0.595622463935845	0.990877270468319	FKBP5	cg08215831	441	0.353070420891581	0.503974129429652	0.899837141336385	NR3C1	cg03560973	441	-0.596038377642002	0.549926462984609	0.972507927733828	SRD5A2	cg18147569	441	2.4954338909593	0.540878915156289	0.986235970602618	DRD2
cg02534661	441	0.944114379511009	0.567567979204142	0.98821050722751	DHRS9	cg10644575	441	-0.212102129592255	0.551911723938797	0.990927793603041	HTR1E	cg13373360	441	0.612448627992272	0.581571318113925	0.993106697966735	AKR1D1	cg21256649	441	0.892396392845328	0.597616106489934	0.990877270468319	HTR2A	cg02928916	441	0.589728861222592	0.503993972138974	0.899837141336385	POMC	cg22900229	441	-2.60883696914407	0.550084134871025	0.972507927733828	HSD11B2	cg03565659	441	-1.01562847027995	0.541079780171263	0.986235970602618	SRD5A2
cg11150353	441	0.945553240604031	0.568251989511434	0.98821050722751	DDC	cg24257309	441	0.560329740294266	0.552736516994657	0.990927793603041	CRHR1	cg09208611	441	0.164656953920146	0.585290519502971	0.993106697966735	FKBP5	cg20991421	441	-0.234702016133285	0.601522816987171	0.990877270468319	HTR2A	cg05506829	441	-1.70828080951214	0.505197281202117	0.899837141336385	HTRA3	cg23085912	441	0.36223483215523	0.551025257867611	0.972507927733828	HSD11B2	cg26126367	441	-1.02183469531326	0.54135778821122	0.986235970602618	AVP
cg05942508	441	0.386105993570972	0.569209865231208	0.98821050722751	NR3C2	cg15347662	441	-0.766353257337618	0.552834420186054	0.990927793603041	HTRA1	cg26932364	441	0.436613895480215	0.588968225914567	0.993106697966735	COMT	cg26274946	441	-0.932957163785598	0.60392579902326	0.990877270468319	AVP	cg20981893	441	1.33210053863588	0.506154043789169	0.899837141336385	HTR2A	cg15919431	441	-2.16747366642123	0.551543705208802	0.972507927733828	HTRA1	cg19226017	441	0.508973045869423	0.546220631497166	0.990488991404467	HTR3A
cg26274946	441	-0.89843219220506	0.569408010111786	0.98821050722751	AVP	cg21298978	441	-0.49957765871404	0.553932610483605	0.990927793603041	HTR2A	cg15910486	441	1.03063305615758	0.589181385181549	0.993106697966735	HTRA1	cg27304079	441	1.45177140984261	0.60468867441007	0.990877270468319	COMT	cg21671386	441	1.02184831963305	0.506786119327494	0.899837141336385	SERPINA6	cg08636224	441	-2.17102338191418	0.551922297854415	0.972507927733828	SRD5A1	cg00310588	441	-0.369239745695038	0.546431335971506	0.990488991404467	HSD11B1
cg17305181	441	0.214347832095937	0.570661264638238	0.98821050722751	TH	cg06291867	441	0.460723540111975	0.554332007739993	0.990927793603041	DRD1	cg10712173	441	2.00822655944081	0.591105222523325	0.993106697966735	LEP	cg12243453	441	0.329154995056423	0.605642628615777	0.990877270468319	DDC	cg06952416	441	-0.85294904989438	0.506825070706996	0.899837141336385	HTR4	cg13069918	441	0.595508310804557	0.552112889617822	0.972507927733828	DDC	cg18248586	441	0.435678992139753	0.547729646061981	0.990488991404467	TH
cg18283321	441	-0.355261956063617	0.576723794372351	0.98821050722751	HTR3A	cg23764129	441	0.504619551348599	0.555971123591236	0.990927793603041	PRKAR1A	cg07304526	441	0.656439166388704	0.591974003913162	0.993106697966735	PROP1	cg19354750	441	-1.0121843943689	0.608618828574936	0.990877270468319	HTR3A	cg21240762	441	-4.36600357032766	0.50820360890791	0.899837141336385	HTR2A	cg04424630	441	-3.20375101173298	0.55303882772931	0.972507927733828	HTR3C	cg00610228	441	-2.58614377509443	0.552077070531035	0.991935159259524	H6PD
cg12728623	441	0.710234290219968	0.576744008547388	0.98821050722751	LEP	cg27208536	441	-0.334905762240665	0.556533683306471	0.990927793603041	COMT	cg08948964	441	-0.243447750907844	0.592070915840524	0.993106697966735	FKBP5	cg18849621	441	-0.513673432711784	0.608876609587817	0.990877270468319	TPH1	cg14094793	441	1.87252904964653	0.508219866960358	0.899837141336385	HTR5A	cg10874403	441	-0.355990798494522	0.553405891256373	0.972507927733828	CRHR2	cg06947205	441	-1.69678445239162	0.553554964092113	0.991935159259524	NR3C1
cg11157691	441	-0.234734455188106	0.578678227748738	0.98821050722751	LEP	cg03667083	441	0.331368807541259	0.56038182695101	0.990927793603041	DHRS9	cg02187522	441	-1.03947796609216	0.59263762058878	0.993106697966735	HTR6	cg26966083	441	0.211557703454919	0.610076712114877	0.990877270468319	COMT	cg25782665	441	0.579180630067572	0.508232592245411	0.899837141336385	MC4R	cg16536918	441	1.45432798341556	0.553530352599158	0.972507927733828	HTRA1	cg24394631	441	-0.256761328342487	0.553866900615797	0.991935159259524	SLC6A4
cg21960184	441	0.13350604231411	0.585990028916767	0.98821050722751	CYP11A1	cg04735509	441	0.24678738735596	0.560554885146878	0.990927793603041	NR3C2	cg18233497	441	0.117431185274564	0.595078371889378	0.993106697966735	TPH1	cg08372315	441	0.279138025758483	0.61112964437515	0.990877270468319	NR3C1	cg02508664	441	-0.552931354215037	0.509214832713262	0.899837141336385	HTR2B	cg10847032	441	0.201627023155375	0.556794764556089	0.972507927733828	HTR5A	cg09672383	441	-0.224712326579091	0.55766166553949	0.991935159259524	FKBP5
cg06947205	441	-0.980352358571023	0.586649115413507	0.98821050722751	NR3C1	cg25535999	441	0.409552195174335	0.561088278121621	0.990927793603041	SLC6A4	cg04144768	441	-0.51061854799649	0.595533577417515	0.993106697966735	HTR3C	cg00293936	441	-0.942294382765249	0.614881604963208	0.990877270468319	HTR6	cg04278702	441	0.476448886199679	0.510694731876148	0.899837141336385	POU1F1	cg17875135	441	-1.37556443457422	0.557383983217163	0.972507927733828	HTR3A	cg25535999	441	0.47519021751529	0.55787653388741	0.991935159259524	SLC6A4
cg17220584	441	-0.161127805815195	0.58691819437463	0.98821050722751	HTR3A	cg02757179	441	-0.268662018843947	0.561689487971747	0.990927793603041	POMC	cg04484523	441	-0.396978526028745	0.595978125221514	0.993106697966735	HTR3C	cg11298960	441	0.255851318060542	0.615980483536193	0.990877270468319	DDC	cg19035496	441	-0.439176557497486	0.511440880207208	0.899837141336385	DRD2	cg12440040	441	-0.239302473211302	0.559507924437404	0.972507927733828	LEP	cg14847514	441	-0.581924706308666	0.558598982345586	0.991935159259524	HTRA1
cg13381984	441	-0.134624887777081	0.587100036427657	0.98821050722751	HTR5A	cg06045576	441	0.389196250746324	0.56292940121837	0.990927793603041	HTRA3	cg01975877	441	1.24207206093932	0.59815406247062	0.993106697966735	H6PD	cg26814075	441	-0.153450236249609	0.616548730765662	0.990877270468319	COMT	cg20991421	441	-0.508983646186161	0.511578501233542	0.899837141336385	HTR2A	cg02992588	441	-0.4141630528121	0.561233250752192	0.972507927733828	DHRS9	cg21141047	441	1.82625881309224	0.563331068304191	0.991935159259524	HTR2A
cg25058023	441	0.142765184487937	0.58757533749629	0.98821050722751	ACE	cg06492144	441	-0.214402199983113	0.563736986202522	0.990927793603041	PROP1	cg19014730	441	-0.322178635224512	0.599551044297317	0.993106697966735	DRD2	cg13251292	441	0.151576069931555	0.620173456902016	0.990877270468319	DDC	cg01972879	441	-0.341934604577978	0.515877111161593	0.899837141336385	HTR6	cg19815720	441	-0.416232736043536	0.564695370756706	0.972507927733828	TPH2	cg14235676	441	-1.41754849232361	0.563909871499436	0.991935159259524	CRH
cg05082563	441	0.216392218209794	0.588877346471394	0.98821050722751	HTRA3	cg06943371	441	2.15028062724948	0.569046937712704	0.990927793603041	SRD5A1	cg00269606	441	0.175580116627779	0.600268502449689	0.993106697966735	HTR6	cg15645634	441	1.61614394594945	0.620391910578951	0.990877270468319	HTR7	cg23598419	441	0.974084592954563	0.518000246115449	0.899837141336385	ACE	cg11765362	441	0.215725986246002	0.565100280633629	0.972507927733828	AKR1D1	cg02577436	441	1.13615433100654	0.566284570715158	0.991935159259524	DHRS9
cg19628225	441	0.189308425967455	0.5888906991795	0.98821050722751	TH	cg21013206	441	0.330260925909725	0.569225386022553	0.990927793603041	HTR2A	cg01732037	441	0.264046461147715	0.600482944173505	0.993106697966735	H6PD	cg26033657	441	0.503974628225689	0.623121007272718	0.990877270468319	AVP	cg16897216	441	-0.376685710116034	0.519462769275587	0.899837141336385	CYP17A1	cg16586394	441	-0.758269792029212	0.565160111098732	0.972507927733828	HTRA1	cg27579609	441	-1.26522656480361	0.568847209519634	0.991935159259524	COMT
cg05346287	441	0.236860311621366	0.589041608531301	0.98821050722751	NR3C2	cg10930664	441	-0.589363898824449	0.571962119536876	0.990927793603041	CRHR2	cg20494779	441	-0.211237526816948	0.601052434931226	0.993106697966735	AVPR1A	cg00930194	441	0.184907976735249	0.624505411529775	0.990877270468319	TBX19	cg00365524	441	0.540156641757244	0.519931284879575	0.899837141336385	HTR6	cg12715421	441	0.498492853643723	0.566485284488065	0.972507927733828	DDC	cg03570920	441	0.145895525488512	0.570660381993357	0.991935159259524	SRD5A2
cg12670061	441	-1.74967408326333	0.590398979595261	0.98821050722751	CRHR2	cg00610228	441	2.0470516291558	0.574496854649498	0.990927793603041	H6PD	cg13450708	441	0.223314425504205	0.602791644957164	0.993106697966735	DDC	cg04424630	441	-1.45995981986762	0.624542209552638	0.990877270468319	HTR3C	cg20423536	441	0.807746059432205	0.520211276851587	0.899837141336385	TPH2	cg24057680	441	3.52267752528157	0.567232307891532	0.972507927733828	ACE	cg21094739	441	-0.492622876977908	0.571586280375886	0.991935159259524	HTR2A
cg02992588	441	0.190531366163904	0.59240465468142	0.98821050722751	DHRS9	cg27130954	441	0.63166609429869	0.57748427175552	0.990927793603041	COMT	cg15403517	441	-0.0853435434792435	0.604005739287221	0.993106697966735	HTRA1	cg00365524	441	0.240239726916257	0.625423540314843	0.990877270468319	HTR6	cg11564670	441	0.307435593836257	0.521067778508807	0.899837141336385	LEP	cg08241694	441	0.57163088493275	0.571097477291554	0.972507927733828	DRD1	cg02508664	441	-0.38246787101164	0.573519375426496	0.991935159259524	HTR2B
cg11845071	441	1.42447708326649	0.593396661771845	0.98821050722751	CRHR2	cg10906284	441	0.167343594024829	0.577755788921301	0.990927793603041	CRHR2	cg08586216	441	-2.42630585844393	0.606668889468611	0.993106697966735	NR3C1	cg11423517	441	-0.196843612305934	0.626154968422621	0.990877270468319	DDC	cg18845001	441	-0.292164422751399	0.522419252156161	0.899837141336385	HTR3A	cg18640030	441	-0.249874550657709	0.571173515060343	0.972507927733828	HTR3B	cg27569822	441	2.64002626084285	0.57428233739219	0.991935159259524	COMT
cg11469319	441	0.815254399525991	0.594786982184563	0.98821050722751	CRHR2	cg19303305	441	0.444559616948026	0.577935114597014	0.990927793603041	TH	cg01972879	441	0.182758486384321	0.608227140285721	0.993106697966735	HTR6	cg14349956	441	-0.808723093953214	0.630230051590141	0.990877270468319	CRH	cg18595639	441	-1.75013418076251	0.523126796869614	0.899837141336385	DRD2	cg16844661	441	-0.574276705391812	0.573998925158974	0.972507927733828	HTRA1	cg10777103	441	-1.7976288476759	0.575667151796397	0.991935159259524	HTR5A
cg23570923	441	-0.467730286062221	0.596983797346091	0.98821050722751	SLC6A4	cg02322203	441	0.630116241436998	0.581084606529987	0.990927793603041	POMC	cg18849621	441	-0.586530306167586	0.608843695426962	0.993106697966735	TPH1	cg09147827	441	0.119295524346278	0.630680192045379	0.990877270468319	FKBP5	cg06947205	441	-2.27085193706679	0.523500759045855	0.899837141336385	NR3C1	cg25150846	441	0.362018286264961	0.575245587975765	0.972507927733828	SLC6A4	cg06492144	441	0.242144699630349	0.578128910279296	0.991935159259524	PROP1
cg11423517	441	-0.186229790499185	0.599164068003268	0.98821050722751	DDC	cg21773872	441	0.347529097744322	0.584176580837362	0.990927793603041	CYP11A1	cg02916102	441	-1.16402742934714	0.611084844014053	0.993106697966735	SRD5A2	cg01962937	441	-1.15758926030692	0.63263001567189	0.990877270468319	H6PD	cg08700190	441	0.490717299440001	0.52353669946329	0.899837141336385	PROP1	cg09623773	441	-0.352964521125793	0.575353319507833	0.972507927733828	FKBP5	cg02322203	441	-0.743303250498786	0.580098049334953	0.991935159259524	POMC
cg02236913	441	-0.123360236131083	0.599287855322692	0.98821050722751	POMC	cg14803762	441	0.414497701214784	0.58666327215529	0.990927793603041	CRH	cg05756489	441	-0.186880115661811	0.614911162671192	0.993106697966735	HTRA3	cg06941869	441	-0.200543001911308	0.634609253269706	0.990877270468319	SRD5A1	cg14174946	441	0.277889693531862	0.524945365876309	0.899837141336385	DDC	cg01581781	441	-0.313784042396367	0.576646145656235	0.972507927733828	TBX19	cg23570923	441	-0.767656161611833	0.582290146242498	0.991935159259524	SLC6A4
cg08372315	441	0.251996921715616	0.601620183764635	0.98821050722751	NR3C1	cg25780543	441	-0.371903499145251	0.586731036412896	0.990927793603041	MC4R	cg25535999	441	0.335926601771788	0.615062964974876	0.993106697966735	SLC6A4	cg19730798	441	1.43511522066864	0.635314604114693	0.990877270468319	TPH2	cg17524078	441	0.30064755757354	0.526698455147273	0.899837141336385	HTR3A	cg26022526	441	3.00167055353975	0.577211268739399	0.972507927733828	MC2R	cg02534661	441	1.43400642237367	0.583557764013549	0.991935159259524	DHRS9
cg04360210	441	0.312500892242991	0.601844712467017	0.98821050722751	DRD3	cg07579946	441	0.523933158811659	0.586798937501683	0.990927793603041	NR3C1	cg15505103	441	0.203046073001431	0.617011549500578	0.993106697966735	HTRA1	cg23042775	441	0.225710062137014	0.635318261386161	0.990877270468319	HSD11B2	cg26135506	441	3.33432714117508	0.527021330490946	0.899837141336385	AVP	cg05426956	441	0.752033121588893	0.578981324159532	0.972507927733828	NR3C2	cg22584138	441	-0.383892145600876	0.583690640787929	0.991935159259524	HSD11B2
cg17036562	441	0.109816317766238	0.603240639158144	0.98821050722751	HTR7	cg12577105	441	-1.64633107684945	0.587563357560729	0.990927793603041	DDC	cg25924472	441	-0.11599231269247	0.618731188186339	0.993106697966735	MC4R	cg01459748	441	0.27984112242404	0.639218078923298	0.990877270468319	HTR6	cg23881278	441	-2.78654708875655	0.527266383599167	0.899837141336385	PRKAR1A	cg10686375	441	-3.94168216405751	0.579914739597959	0.972507927733828	HTR1E	cg02937158	441	-0.393126167398969	0.585376225917388	0.991935159259524	POMC
cg11514288	441	0.306327465321813	0.60524106545091	0.98821050722751	DDC	cg08241694	441	-0.369859770412202	0.588549421939542	0.990927793603041	DRD1	cg27410679	441	0.362993304309665	0.619212435750469	0.993106697966735	COMT	cg22391185	441	0.964134540359158	0.639900228797093	0.990877270468319	CYP11A1	cg23409074	441	-0.303464877612097	0.52774882831503	0.899837141336385	ACE	cg02661802	441	3.67122414423495	0.580895459057949	0.972507927733828	DHRS9	cg15600279	441	0.300184174601724	0.587027732455507	0.991935159259524	HTRA1
cg21796427	441	0.521070726823965	0.606412307056455	0.98821050722751	CYP11A1	cg18773997	441	0.332232301746234	0.589102569789652	0.990927793603041	DRD2	cg21013206	441	0.27527398598096	0.619343002442887	0.993106697966735	HTR2A	cg19628225	441	0.186118849998593	0.640368756656215	0.990877270468319	TH	cg08473090	441	-0.953566251545775	0.528774131591736	0.899837141336385	NR3C1	cg02440279	441	-3.69111503290354	0.581448103239224	0.972507927733828	POMC	cg02079741	441	-0.373862473627713	0.588180625937078	0.991935159259524	HSD11B1
cg10276623	441	-0.119923426251218	0.60754843454164	0.98821050722751	HTR1E	cg25446361	441	0.293885152660833	0.59183489945504	0.990927793603041	CRHR1	cg09318122	441	0.175066810744692	0.620333970556588	0.993106697966735	FKBP5	cg07545640	441	-1.7668012705035	0.640458333830514	0.990877270468319	NR3C1	cg20967585	441	0.267751858424526	0.529863182303845	0.899837141336385	HTR2A	cg20140452	441	-1.63008132773951	0.581855795701391	0.972507927733828	TPH2	cg07658503	441	0.658175880689744	0.589943390154081	0.991935159259524	DRD1
cg04490037	441	0.20103746604874	0.608586125823636	0.98821050722751	DRD3	cg04900872	441	0.32537991353233	0.591896680523501	0.990927793603041	HTRA3	cg17637877	441	-0.215043634580585	0.623193375686464	0.993106697966735	DRD2	cg01714756	441	0.238698203179477	0.640527229310649	0.990877270468319	H6PD	cg01845356	441	-0.491087367130252	0.530094006126111	0.899837141336385	H6PD	cg12746356	441	4.3080762787165	0.581918479276877	0.972507927733828	HTR5A	cg06087101	441	0.355871295249057	0.590657889525701	0.991935159259524	HTRA3
cg20991421	441	-0.201996162226267	0.610903619425629	0.98821050722751	HTR2A	cg22059812	441	-1.4383535046408	0.593708166794798	0.990927793603041	CYP11A1	cg17342132	441	0.450271165673478	0.623476125321767	0.993106697966735	HTR3B	cg08560888	441	0.207103140028718	0.64067122764233	0.990877270468319	NR3C1	cg21878188	441	3.85986528837009	0.53034327777734	0.899837141336385	CYP11A1	cg15003182	441	-0.696881043314251	0.586275075519655	0.972507927733828	HTRA1	cg05942508	441	-0.593594500383704	0.590950267287571	0.991935159259524	NR3C2
cg15403517	441	-0.0640201816389404	0.61164575323666	0.98821050722751	HTRA1	cg03724721	441	1.07249237878223	0.595337818141203	0.990927793603041	SRD5A2	cg17805199	441	-0.581472697105295	0.624139080314101	0.993106697966735	DRD2	cg05951817	441	0.243358032024803	0.640762387949034	0.990877270468319	NR3C2	cg23753947	441	-1.0710542977951	0.530610488233684	0.899837141336385	SLC6A4	cg11202160	441	-0.478028789589642	0.586323017892201	0.972507927733828	CRHR2	cg08208133	441	-0.34081987465719	0.592398308647587	0.991935159259524	NR3C1
cg14692377	441	-0.912662100209236	0.613232106380315	0.98821050722751	CRH	cg05426956	441	0.48901285286932	0.596299898444753	0.990927793603041	NR3C2	cg21080473	441	-0.18681313698084	0.624703522399797	0.993106697966735	HTR2A	cg07579946	441	0.373652766942459	0.641158762100758	0.990877270468319	NR3C1	cg00107488	441	0.696395717963548	0.532440634358183	0.900865073304879	H6PD	cg03843951	441	0.56990738174114	0.586795562570804	0.972507927733828	POMC	cg05082563	441	0.337368533399534	0.593051619530978	0.991935159259524	HTRA3
cg01049782	441	-0.227153394743818	0.61422241336572	0.98821050722751	HSD11B1	cg11157691	441	-0.303838952181406	0.596450594732334	0.990927793603041	LEP	cg18450270	441	0.283661085025887	0.62652844952192	0.993106697966735	DRD2	cg06947205	441	-0.961201279675272	0.641917848360715	0.990877270468319	NR3C1	cg08730070	441	-1.55148870100575	0.535037963610581	0.903183351416026	SRD5A1	cg18007806	441	0.334250717374562	0.586899588480226	0.972507927733828	HTR3A	cg00308665	441	-0.250776583609676	0.59322665263153	0.991935159259524	H6PD
cg06937024	441	1.48546694842081	0.614427933290114	0.98821050722751	PROP1	cg06961323	441	-0.295924916559074	0.597089825742525	0.990927793603041	PROP1	cg25920792	441	1.97763361806586	0.626738923935769	0.993106697966735	MC2R	cg25940513	441	-0.326502199210868	0.642388208115318	0.990877270468319	MC2R	cg06492144	441	0.328564319891273	0.54116903060211	0.911442577856185	PROP1	cg23524341	441	-2.07912781591459	0.589421687108885	0.972507927733828	ACE	cg07194846	441	0.354972546172064	0.593811354588132	0.991935159259524	SRD5A1
cg01330016	441	-0.724582743081405	0.616588539927777	0.98821050722751	H6PD	cg22601917	441	-0.472042976196194	0.598616608191364	0.990927793603041	HSD11B2	cg12758687	441	-0.229624775444873	0.628542132463513	0.993106697966735	LEP	cg14170547	441	0.244435095911389	0.642413633276989	0.990877270468319	LEP	cg24862443	441	1.79844724244055	0.542809887928493	0.912118898436919	ACE	cg10135483	441	0.304841224041086	0.590385477208666	0.972507927733828	HTR1E	cg18845001	441	-0.194215085041649	0.599074391544626	0.991935159259524	HTR3A
cg01335087	441	-0.352426057611053	0.617887738191856	0.98821050722751	H6PD	cg27646908	441	-1.67657050641732	0.599480470198777	0.990927793603041	COMT	cg04490037	441	-0.251381771190625	0.630316784971263	0.993106697966735	DRD3	cg13450708	441	-0.172578774305889	0.644629909012015	0.990877270468319	DDC	cg12758687	441	-0.430491610430767	0.548568601921035	0.912807433872723	LEP	cg24026230	441	0.168958162670418	0.590889624743117	0.972507927733828	PRKAR1A	cg02661802	441	-2.7065762047638	0.601328639346243	0.991935159259524	DHRS9
cg21671386	441	0.391164057842043	0.619153008333978	0.98821050722751	SERPINA6	cg01581781	441	-0.199810511966443	0.600428756909088	0.990927793603041	TBX19	cg16834011	441	0.473042683626902	0.631417323803745	0.993106697966735	HTR7	cg20592995	441	-0.623392058257533	0.64842639836578	0.990877270468319	AVPR1A	cg18773129	441	-1.38935824316385	0.550175622222824	0.912807433872723	TH	cg04900872	441	-0.499830144931451	0.59103796578239	0.972507927733828	HTRA3	cg17537380	441	-0.235667592915254	0.601490431056787	0.991935159259524	HTR3B
cg25836061	441	0.444451990863196	0.62257515739114	0.98821050722751	MC4R	cg06777002	441	1.44519078109809	0.601069006246374	0.990927793603041	PROP1	cg00610228	441	1.66005425304448	0.634397782219493	0.993106697966735	H6PD	cg24525872	441	2.09463144437553	0.648507452982473	0.990877270468319	CRHR1	cg02299946	441	2.11328858876923	0.550201829796929	0.912807433872723	POMC	cg15600279	441	0.383183228987307	0.591549617923239	0.972507927733828	HTRA1	cg12966915	441	1.83923373930703	0.606162703556952	0.991935159259524	LEP
cg12367389	441	0.245472395947297	0.623398296339522	0.98821050722751	DDC	cg25836061	441	0.645066292888152	0.602156267895631	0.990927793603041	MC4R	cg11202160	441	-0.265621411515469	0.636437972146138	0.993106697966735	CRHR2	cg02440279	441	1.68411787281	0.648593402055592	0.990877270468319	POMC	cg09495977	441	2.20070547185524	0.550450232549736	0.912807433872723	FKBP5	cg06777002	441	-2.20745184891838	0.592016597270162	0.972507927733828	PROP1	cg04360210	441	0.486988812558047	0.606184638740312	0.991935159259524	DRD3
cg05951817	441	0.224055282000355	0.624976178728292	0.98821050722751	NR3C2	cg07528216	441	-0.287361514544516	0.602328151054719	0.990927793603041	NR3C1	cg23549160	441	1.05204001587856	0.636635386147942	0.993106697966735	PRKAR1A	cg16834011	441	0.388261463316703	0.650408181397949	0.990877270468319	HTR7	cg10185667	441	-1.98830970817911	0.550728984141227	0.912807433872723	HTR1E	cg18248586	441	0.48928515661755	0.597073271673512	0.972507927733828	TH	cg27551605	441	-0.305875532815593	0.609535191347405	0.991935159259524	COMT
cg02712145	441	0.273544341743583	0.627254631675391	0.98821050722751	SRD5A2	cg20941184	441	0.309170067246275	0.602390167159342	0.990927793603041	HTR2A	cg08636224	441	1.10986498448522	0.640380500103316	0.993106697966735	SRD5A1	cg14855334	441	1.63882569457924	0.650558533854209	0.990877270468319	HTR7	cg21633143	441	-2.55185337581089	0.551927763500531	0.912807433872723	SERPINA6	cg19878200	441	0.376006710791378	0.597272234841691	0.972507927733828	AVPR1A	cg15607306	441	0.299007430255908	0.609787959912117	0.991935159259524	HTRA1
cg09147827	441	0.105664447669393	0.627468778402839	0.98821050722751	FKBP5	cg12248358	441	0.288835759663479	0.60245846717101	0.990927793603041	HTR5A	cg24105933	441	-0.76726178330346	0.64083179790192	0.993106697966735	SLC6A4	cg25730237	441	-0.326304488501169	0.655600264134332	0.990877270468319	MC4R	cg20387815	441	-1.4797027660515	0.552368235692262	0.912807433872723	AVPR1A	cg25054907	441	-2.51607211917016	0.597588880905089	0.972507927733828	CRHR1	cg26720913	441	0.726925070957296	0.611678240343327	0.991935159259524	COMT
cg06346307	441	0.334460596097241	0.628452420852941	0.98821050722751	HTR4	cg09926649	441	-0.498464759464108	0.603981252291165	0.990927793603041	HTR1E	cg06787004	441	-0.834054982577678	0.644078800586664	0.993106697966735	DRD1	cg15719652	441	-0.342766517902417	0.656069777154357	0.990877270468319	HTR7	cg22549881	441	0.173091707483672	0.553141461287003	0.912807433872723	HSD11B2	cg24934431	441	0.760441119622158	0.597594234577117	0.972507927733828	ACE	cg07760722	441	-0.773969133681097	0.612470426141424	0.991935159259524	HTR4
cg04484523	441	-0.275712614933019	0.628833757523132	0.98821050722751	HTR3C	cg19837528	441	0.446285897249368	0.608958277790237	0.990927793603041	AVPR1A	cg04856689	441	-0.602269462691146	0.644135388284274	0.993106697966735	NR3C2	cg25276126	441	0.170880922413948	0.657649641151355	0.990877270468319	SLC6A4	cg11361387	441	0.756478090401675	0.55611368195081	0.913996747249087	DDC	cg26344168	441	-0.178170621109008	0.597656546257976	0.972507927733828	AVP	cg14059288	441	-0.84397997085489	0.613441261730181	0.991935159259524	HTR5A
cg06521673	441	-1.58558167656769	0.630170758499985	0.98821050722751	DRD1	cg05454635	441	0.638315960335056	0.610038023082041	0.990927793603041	HTRA3	cg26022526	441	-1.58970143952452	0.644324490743104	0.993106697966735	MC2R	cg04987827	441	1.81062251662157	0.65816081551933	0.990877270468319	NR3C2	cg17790333	441	0.561991831239255	0.558502295418485	0.913996747249087	HTR3B	cg02712145	441	0.607717850426628	0.598149699453846	0.972507927733828	SRD5A2	cg12083122	441	1.00646336104102	0.615109773247385	0.991935159259524	HTR5A
cg18442632	441	0.195784569730842	0.630281212733313	0.98821050722751	TH	cg04490037	441	0.271048548654935	0.610726518020776	0.990927793603041	DRD3	cg12017635	441	-0.242181327675929	0.647215762031805	0.993106697966735	DDC	cg10276623	441	-0.117176397139282	0.659698207690718	0.990877270468319	HTR1E	cg25920792	441	-3.66371024019305	0.558584773588161	0.913996747249087	MC2R	cg10335743	441	-0.505025026527253	0.599806558832438	0.972507927733828	FKBP5	cg03691958	441	-1.77100021694606	0.615909616084142	0.991935159259524	POMC
cg26022526	441	1.26049692653717	0.632161797339529	0.98821050722751	MC2R	cg16335926	441	1.12517185925633	0.61154024914951	0.990927793603041	HTRA1	cg24610236	441	0.286703325902513	0.650316490456029	0.993106697966735	ACE	cg04768425	441	0.174426441729221	0.66032963410215	0.990877270468319	NR3C2	cg07658503	441	0.863485217003912	0.559707606027038	0.913996747249087	DRD1	cg00269606	441	-0.27694227696686	0.599885165772356	0.972507927733828	HTR6	cg20807790	441	0.185315198400153	0.618180542229222	0.991935159259524	HTR2A
cg04967039	441	0.140662624868764	0.632968927029308	0.98821050722751	NR3C2	cg08389266	441	0.257799562683125	0.611922282118618	0.990927793603041	NR3C1	cg19233761	441	0.230397570699565	0.652354499941753	0.993106697966735	HTR3B	cg08730070	441	-0.625962855295939	0.666563205000049	0.990877270468319	SRD5A1	cg09916783	441	0.639336180327107	0.561579930650639	0.913996747249087	FKBP5	cg09361691	441	-0.6556269393297	0.601878761983682	0.972507927733828	HTR1E	cg24164005	441	-0.535450304136735	0.618417810453901	0.991935159259524	CRHR1
cg20016411	441	0.115860971007353	0.635674931677852	0.98821050722751	AVPR1A	cg24578679	441	-2.56543610595805	0.61271919479749	0.990927793603041	CRHR1	cg20967585	441	-0.129821969140129	0.653714694605979	0.993106697966735	HTR2A	cg21773872	441	0.231041815953631	0.666971311340744	0.990877270468319	CYP11A1	cg07275757	441	0.346853697780655	0.564376086557346	0.913996747249087	DRD1	cg02734600	441	-0.823630743895627	0.603390855685789	0.972507927733828	POMC	cg21633143	441	-1.69057085666531	0.619221076812619	0.991935159259524	SERPINA6
cg26558919	441	1.30512596324836	0.63719636070541	0.98821050722751	COMT	cg16897216	441	0.21017552893256	0.613832072046863	0.990927793603041	CYP17A1	cg09366519	441	0.213299361714117	0.655361831015388	0.993106697966735	FKBP5	cg06291867	441	0.281380897309752	0.667733326875047	0.990877270468319	DRD1	cg23612570	441	-0.533472329827985	0.564827539963376	0.913996747249087	PRKAR1A	cg10288772	441	-1.89617961009097	0.604129638297259	0.972507927733828	FKBP5	cg15888097	441	0.183565226346491	0.619246951329433	0.991935159259524	HTR7
cg02276314	441	0.304180496412814	0.638046465181181	0.98821050722751	DHRS9	cg25114611	441	0.429729496498563	0.614530737599596	0.990927793603041	SLC6A4	cg21919834	441	0.420371221109235	0.656759398668325	0.993106697966735	CYP11A1	cg16003049	441	-0.207821641623238	0.670406461153819	0.990877270468319	HTRA1	cg18726036	441	-1.05439487132646	0.565706684482481	0.913996747249087	DRD2	cg21960184	441	0.25862648237692	0.604607792168578	0.972507927733828	CYP11A1	cg17875135	441	-0.911231344083942	0.620017951694452	0.991935159259524	HTR3A
cg21478490	441	0.157234642769111	0.638313068447295	0.98821050722751	SERPINA6	cg01049782	441	0.307014792248255	0.615554213114843	0.990927793603041	HSD11B1	cg24353392	441	0.429574303982141	0.657264129846872	0.993106697966735	PRKAR1A	cg26948603	441	-0.709104335766873	0.67103791336115	0.990877270468319	COMT	cg26724798	441	0.270811556184924	0.566386911395276	0.913996747249087	COMT	cg27549720	441	-0.424060132225668	0.606370612338781	0.972507927733828	COMT	cg06457577	441	-1.32390408776856	0.620129235296479	0.991935159259524	DRD1
cg00629244	441	1.38734372005717	0.641488389800347	0.98821050722751	HTR6	cg26022526	441	1.77296562350898	0.618717596990153	0.990927793603041	MC2R	cg26126367	441	0.616119275246647	0.66082948897955	0.993106697966735	AVP	cg08473090	441	-0.37778647975196	0.671383798850691	0.990877270468319	NR3C1	cg21577406	441	-0.661392657816698	0.566704690162915	0.913996747249087	SERPINA6	cg22458194	441	2.1215957706073	0.606383848311128	0.972507927733828	CYP11A1	cg01819552	441	0.244159211465269	0.622792595925848	0.991935159259524	H6PD
cg21878188	441	1.4547986319029	0.643259161947545	0.98821050722751	CYP11A1	cg06285340	441	0.254346486933167	0.620587232781211	0.990927793603041	NR3C2	cg18595639	441	0.82967108152906	0.661608043821857	0.993106697966735	DRD2	cg15692052	441	-0.287040267694931	0.672478996706601	0.990877270468319	CYP17A1	cg25836326	441	0.704671462155683	0.568407468419504	0.913996747249087	MC2R	cg09199250	441	-0.472432041552962	0.608629518008326	0.972507927733828	FKBP5	cg19802564	441	0.278752512504828	0.623309100960301	0.991935159259524	TPH2
cg15692052	441	-0.274105614391906	0.645498597727417	0.98821050722751	CYP17A1	cg08400935	441	0.421289293386335	0.621336601123666	0.990927793603041	NR3C1	cg26033657	441	0.515523667964733	0.661760248885933	0.993106697966735	AVP	cg09490603	441	0.713017150426335	0.672489461921802	0.990877270468319	FKBP5	cg00446087	441	-1.18933785994548	0.569326143745987	0.913996747249087	HSD11B1	cg19107055	441	-0.466898097107302	0.609153740573357	0.972507927733828	HTR3B	cg26814075	441	0.207546566219567	0.623429675200381	0.991935159259524	COMT
cg02955911	441	-0.601130795831297	0.648371112312541	0.98821050722751	POMC	cg13373360	441	0.54676603006067	0.622572241296974	0.990927793603041	AKR1D1	cg20518096	441	0.187558792956348	0.662195188374972	0.993106697966735	AVPR1A	cg07102705	441	0.115530091787714	0.672694529172488	0.990877270468319	HTR4	cg22812013	441	-0.798551733207026	0.570006123624091	0.913996747249087	HSD11B2	cg07194846	441	0.439560640866515	0.609239984793669	0.972507927733828	SRD5A1	cg25054907	441	-1.77706835062635	0.624274699813006	0.991935159259524	CRHR1
cg02037013	441	0.10331958984491	0.649162797649949	0.98821050722751	H6PD	cg02508664	441	-0.284959294261845	0.623349214623505	0.990927793603041	HTR2B	cg14170547	441	-0.261090081750381	0.662202895429674	0.993106697966735	LEP	cg02665568	441	-0.440390649640557	0.674028076393255	0.990877270468319	DHRS9	cg20016411	441	0.268336046735702	0.571790179083963	0.914320828568302	AVPR1A	cg18603538	441	0.513381547633985	0.61077642714137	0.972507927733828	HTR3B	cg19826045	441	0.925133659355796	0.625514520696085	0.991935159259524	AVPR1A
cg17537380	441	-0.129344602773453	0.650538222217012	0.98821050722751	HTR3B	cg09122657	441	-2.20771633789202	0.623531937989905	0.990927793603041	HTR1E	cg08894761	441	-0.0893978884442341	0.664287402368106	0.993106697966735	DRD1	cg01972879	441	0.130590783995856	0.674194132137661	0.990877270468319	HTR6	cg02579332	441	0.234525076620189	0.573027621382832	0.914320828568302	SRD5A2	cg15719652	441	-0.681892421751116	0.612091281003909	0.972507927733828	HTR7	cg08273233	441	-0.527363014193079	0.626242866220505	0.991935159259524	SRD5A1
cg26880525	441	0.360528670647733	0.652019066949905	0.98821050722751	COMT	cg05756489	441	0.188899353808598	0.625005584239392	0.990927793603041	HTRA3	cg11338426	441	-0.77341429292766	0.665683350791864	0.993106697966735	DDC	cg19303305	441	-0.278364448329375	0.675683176540757	0.990877270468319	TH	cg15692052	441	-0.655365037409761	0.574041157479594	0.914320828568302	CYP17A1	cg18190187	441	-1.90724334142869	0.613432862954791	0.972507927733828	HTR3A	cg09863441	441	0.736428428676726	0.627244742601297	0.991935159259524	FKBP5
cg15910486	441	0.661081275254789	0.653735436587429	0.98821050722751	HTRA1	cg15003182	441	0.398232529311426	0.625877554219231	0.990927793603041	HTRA1	cg12761518	441	0.318063030450167	0.666058636784846	0.993106697966735	DDC	cg02508664	441	-0.20165967097311	0.677257567185465	0.990877270468319	HTR2B	cg18200810	441	-0.458278673848635	0.575177369058592	0.914320828568302	HTR3B	cg24108194	441	-2.72377034999567	0.615818016750314	0.972507927733828	CRHR1	cg03056854	441	-0.317029763459749	0.629677471612095	0.991935159259524	HTR2B
cg18068240	441	-1.67834033615494	0.660486500315225	0.98821050722751	TH	cg20494779	441	0.205195929212878	0.627949965591143	0.990927793603041	AVPR1A	cg10901968	441	1.67506249281699	0.66706336620229	0.993106697966735	DDC	cg04091563	441	-0.0839289551425933	0.677264506304573	0.990877270468319	POMC	cg07501070	441	-0.505894930122076	0.578478275059271	0.917245645121866	DRD1	cg23598419	441	-0.884317886636948	0.616206879094055	0.972507927733828	ACE	cg14127947	441	0.302264709429773	0.630155251115729	0.991935159259524	AKR1D1
cg20518096	441	0.144790187109806	0.660534340146448	0.98821050722751	AVPR1A	cg17426905	441	-0.3016867288544	0.629311298344555	0.990927793603041	TH	cg05454635	441	0.506288102115316	0.670212541688905	0.993106697966735	HTRA3	cg11152298	441	-1.60961966392681	0.678039970379171	0.990877270468319	HTR5A	cg08479865	441	-0.238989392110462	0.579509816551179	0.917245645121866	PROP1	cg12639324	441	-2.1168429076431	0.618832750420772	0.972507927733828	DDC	cg00615746	441	0.214045149916221	0.636100522492473	0.991935159259524	HSD11B1
cg13450708	441	0.143968941813906	0.661319730026754	0.98821050722751	DDC	cg18534039	441	-0.184645110404024	0.6305055874879	0.990927793603041	TH	cg07528216	441	-0.225551551817637	0.670329186402823	0.993106697966735	NR3C1	cg00840332	441	-0.100179871264676	0.678761289359078	0.990877270468319	H6PD	cg14809166	441	0.405450899568092	0.584661313246797	0.917694797500894	CRH	cg12807275	441	0.392214013266913	0.618957353771489	0.972507927733828	DDC	cg15919431	441	-1.32686236732964	0.636668307097343	0.991935159259524	HTRA1
cg02322203	441	-0.373294866508269	0.661608744391445	0.98821050722751	POMC	cg18023598	441	0.642470251161932	0.630719421806089	0.990927793603041	TH	cg20336341	441	0.321401093326862	0.671056677605347	0.993106697966735	TPH2	cg07304526	441	0.441782000337643	0.678769337058768	0.990877270468319	PROP1	cg04443360	441	0.362891703279467	0.584889110962174	0.917694797500894	HTR3C	cg16811558	441	0.942569695314438	0.620121743037742	0.972507927733828	HTRA1	cg19594666	441	0.153957074300454	0.638336896065449	0.991935159259524	HTR3A
cg02501334	441	-0.988539704265084	0.662084303558437	0.98821050722751	POMC	cg14809166	441	-0.246984939055767	0.632413998379737	0.990927793603041	CRH	cg11157691	441	-0.234737727813466	0.671355740325867	0.993106697966735	LEP	cg03691958	441	1.03210004425242	0.680080832904274	0.990877270468319	POMC	cg11845071	441	2.87012067310268	0.585098855644497	0.917694797500894	CRHR2	cg24680141	441	-2.61401268215199	0.620639487486229	0.972507927733828	ACE	cg05454635	441	0.674091458099111	0.639565441114169	0.991935159259524	HTRA3
cg01586609	441	0.128188162998405	0.662565490563425	0.98821050722751	HTR6	cg20592995	441	-0.777180612941868	0.63324085799074	0.990927793603041	AVPR1A	cg04111177	441	-1.39555159508114	0.67169183997319	0.993106697966735	SRD5A2	cg23027580	441	-0.832745005866177	0.682580699899326	0.990877270468319	HSD11B2	cg08208133	441	0.424628672049404	0.585108459451744	0.917694797500894	NR3C1	cg11111332	441	-0.486669777364014	0.623558370838287	0.972507927733828	CRHR2	cg09122657	441	-2.45484475999203	0.639736414467696	0.991935159259524	HTR1E
cg00335286	441	0.154858184037323	0.66520490088212	0.98821050722751	H6PD	cg21702128	441	-0.102161156320105	0.633481110005636	0.990927793603041	CYP11A1	cg18755984	441	-0.173047268875902	0.67412954960477	0.993106697966735	TH	cg00666422	441	-0.0910248644876225	0.683450330460253	0.990877270468319	HTR6	cg17030679	441	0.572764553771278	0.58602792775193	0.917694797500894	HTRA1	cg09495977	441	1.90518043731742	0.624084742334183	0.972507927733828	FKBP5	cg09490603	441	-1.10214315591707	0.639822206835949	0.991935159259524	FKBP5
cg16834011	441	0.32379405599741	0.665888444736169	0.98821050722751	HTR7	cg21094739	441	0.359149741792308	0.634139933134555	0.990927793603041	HTR2A	cg21661983	441	0.262438908697883	0.67421110603984	0.993106697966735	SERPINA6	cg21094739	441	0.256339279424547	0.683839662505431	0.990877270468319	HTR2A	cg11712482	441	0.665234904620312	0.589107135343784	0.920558071365234	HTR5A	cg14692377	441	-1.81659038144794	0.624701542469669	0.972507927733828	CRH	cg12825070	441	0.115191710776064	0.639861718669069	0.991935159259524	CRHR2
cg12577105	441	0.960593043661318	0.667201874653984	0.98821050722751	DDC	cg06087101	441	0.262445094480918	0.639120171157122	0.994179481331605	HTRA3	cg21256649	441	0.819147409722091	0.674839074114432	0.993106697966735	HTR2A	cg08948964	441	-0.161138399437309	0.684671302630054	0.990877270468319	FKBP5	cg20629239	441	1.26794993733816	0.591094248218117	0.921706285357063	TPH2	cg27646908	441	2.25894630750814	0.624889612505542	0.972507927733828	COMT	cg04484523	441	-0.422157394974337	0.640361206847961	0.991935159259524	HTR3C
cg02318454	441	0.140205342998732	0.667940838351926	0.98821050722751	POMC	cg02299946	441	1.15149879483786	0.641657840106616	0.994179481331605	POMC	cg23601416	441	0.332411427900767	0.674995175079669	0.993106697966735	CRHR1	cg14734794	441	0.123782301953003	0.684818156354278	0.990877270468319	CRH	cg14692377	441	-1.89186841055757	0.592959564228253	0.922660125310769	CRH	cg13000004	441	-0.660687071081846	0.624994904644159	0.972507927733828	DDC	cg21478490	441	0.245291935053118	0.640504176677908	0.991935159259524	SERPINA6
cg06623827	441	0.159849714514634	0.668992735636049	0.98821050722751	HTR4	cg18200810	441	0.278512608375664	0.641661812298906	0.994179481331605	HTR3B	cg14692377	441	-0.986120184815039	0.675094166515153	0.993106697966735	CRH	cg17342132	441	0.325492156152401	0.685337913343713	0.990877270468319	HTR3B	cg20060666	441	1.41191457263006	0.596240325514743	0.925807762824579	TPH2	cg24578679	441	-3.62665216044858	0.632709192163075	0.976880114996762	CRHR1	cg26558919	441	-2.06854821906556	0.642955234009164	0.991935159259524	COMT
cg23365637	441	-0.698826188414429	0.669351010649165	0.98821050722751	ACE	cg16845257	441	0.311256155603353	0.64478506964034	0.994179481331605	HTRA1	cg26880525	441	0.468949386685057	0.67588308633203	0.993106697966735	COMT	cg04554613	441	0.308431871764067	0.686536351517887	0.990877270468319	HTRA3	cg02665568	441	0.959476620952609	0.598246899188424	0.926967826953011	DHRS9	cg27521571	441	0.30774993062174	0.633895939779864	0.976880114996762	COMT	cg00446087	441	-0.781676776206492	0.644443772799187	0.991935159259524	HSD11B1
cg09527270	441	-0.154061252016103	0.670750248895566	0.98821050722751	FKBP5	cg04607131	441	-0.255268001867164	0.646417380914545	0.994179481331605	NR3C2	cg18865272	441	-0.714947634791431	0.676942739846508	0.993106697966735	DRD2	cg18701449	441	0.139856997182313	0.686544842561761	0.990877270468319	DRD2	cg16586394	441	0.659275878813195	0.603441792620688	0.932558156459593	HTRA1	cg11731737	441	-2.28404147439366	0.635730327406736	0.976880114996762	CRHR2	cg11564670	441	0.178234744945708	0.645752682063281	0.991935159259524	LEP
cg25924472	441	-0.075940037213611	0.672662070920186	0.98821050722751	MC4R	cg26532621	441	-0.292931885786613	0.647107697725734	0.994179481331605	AVP	cg25725890	441	-1.44709347684314	0.681270211379014	0.993106697966735	MC2R	cg01330016	441	-0.662019441981948	0.687415408905582	0.990877270468319	H6PD	cg14065127	441	0.486622904166614	0.604388913901122	0.932558156459593	LEP	cg06149357	441	-0.197663467806183	0.638341014885068	0.976880114996762	HTRA3	cg08586216	441	-2.63026448839351	0.647272610683023	0.991935159259524	NR3C1
cg18226539	441	0.18684835770629	0.673665013037585	0.98821050722751	HTR3A	cg11845071	441	-1.68820989954795	0.647256175757065	0.994179481331605	CRHR2	cg18757974	441	0.817381417591297	0.682293551847705	0.993106697966735	DRD2	cg04199256	441	0.365352099435844	0.688807134456609	0.990877270468319	DRD3	cg12083122	441	1.27723707071252	0.606204423105684	0.933043115775782	HTR5A	cg25022311	441	0.311062313660137	0.641051750561398	0.976880114996762	CRHR1	cg09199250	441	-0.326955898627928	0.647807619006023	0.991935159259524	FKBP5
cg20073007	441	0.31224186488666	0.675184092167862	0.98821050722751	TPH2	cg01718447	441	0.304245319081388	0.65363130081769	0.994179481331605	H6PD	cg25836326	441	0.334968581654873	0.685176523246281	0.993106697966735	MC2R	cg26880525	441	0.37770743470497	0.688911659952503	0.990877270468319	COMT	cg18773997	441	0.450935581588443	0.607238658229075	0.933043115775782	DRD2	cg20991421	441	0.377015421669692	0.643437765438051	0.976880114996762	HTR2A	cg13947929	441	-0.36198885414914	0.648307035207737	0.991935159259524	DDC
cg04632887	441	-0.445352650555732	0.676737036560342	0.98821050722751	HTRA3	cg26638505	441	-0.129947517351994	0.654122724071802	0.994179481331605	COMT	cg10216820	441	0.291550534055682	0.689626431609363	0.993106697966735	FKBP5	cg23974739	441	0.194752918872401	0.6890678051429	0.990877270468319	ACE	cg19530293	441	-0.25172290739986	0.614252152090499	0.935149019366441	TH	cg13245440	441	-0.294018078007466	0.644691651158717	0.976880114996762	DDC	cg07545640	441	-2.40166739730743	0.648764704399841	0.991935159259524	NR3C1
cg10288772	441	0.734801043410193	0.677026764159045	0.98821050722751	FKBP5	cg17637877	441	0.206155277287275	0.657452680489167	0.994179481331605	DRD2	cg05082563	441	-0.20866150279268	0.690195940804136	0.993106697966735	HTRA3	cg25121146	441	-0.083032136638701	0.689862878072281	0.990877270468319	PRKAR1A	cg23035419	441	0.879184248145228	0.614342879919065	0.935149019366441	HSD11B2	cg12367389	441	-0.484331766617391	0.645992131612479	0.976880114996762	DDC	cg09623773	441	-0.220906273455037	0.648987223154917	0.991935159259524	FKBP5
cg12580770	441	0.0750586112712817	0.678371845765091	0.98821050722751	DDC	cg01330016	441	0.886349293739685	0.657879634545617	0.994179481331605	H6PD	cg23598419	441	-0.445119063920195	0.691055349365338	0.993106697966735	ACE	cg13645651	441	0.114710786065126	0.690450094291221	0.990877270468319	CRHR2	cg17537380	441	-0.279355525143095	0.614997738208174	0.935149019366441	HTR3B	cg03216867	441	-0.526239020012827	0.647407765640264	0.976880114996762	POMC	cg10135483	441	0.200961448155784	0.651686961434618	0.991935159259524	HTR1E
cg05141787	441	-0.202753106005145	0.679464151113445	0.98821050722751	HTRA3	cg13521908	441	1.00820620957587	0.658773664547289	0.994179481331605	DDC	cg26344168	441	-0.0862177820728061	0.693035819881676	0.993106697966735	AVP	cg09201719	441	-1.14015612753087	0.692196126788022	0.990877270468319	HTR1E	cg25725890	441	-2.59765771570238	0.615514250750556	0.935149019366441	MC2R	cg07733851	441	0.675407402857567	0.648271383729046	0.976880114996762	NR3C1	cg00840332	441	0.150938408443674	0.652069993221635	0.991935159259524	H6PD
cg22546130	441	0.287679988289373	0.679618131623967	0.98821050722751	HSD11B2	cg02916102	441	-1.0512826393293	0.660658175596931	0.994179481331605	SRD5A2	cg09122657	441	1.6893584895993	0.693906210505256	0.993106697966735	HTR1E	cg02037013	441	0.102254986044535	0.693325750414755	0.990877270468319	H6PD	cg07806248	441	-0.241883989810021	0.619737625435983	0.935149019366441	NR3C1	cg22391185	441	-1.94057575584217	0.651126624512055	0.976880114996762	CYP11A1	cg24680141	441	-1.83401614229308	0.652305186252187	0.991935159259524	ACE
cg15926585	441	0.158031563274138	0.681576471464985	0.98821050722751	CYP17A1	cg16844661	441	0.296771473068394	0.662561875041302	0.994179481331605	HTRA1	cg14094793	441	-0.745782120259828	0.695083762106756	0.993106697966735	HTR5A	cg26160839	441	0.152347226191627	0.693794927995546	0.990877270468319	AVP	cg09490603	441	1.44156248061519	0.620282661102532	0.935149019366441	FKBP5	cg08372315	441	0.44542548298907	0.652929128875448	0.976880114996762	NR3C1	cg22614355	441	-0.809900897099512	0.654853216419295	0.993756633576498	HSD11B2
cg10953410	441	0.0762434972027982	0.682634211386558	0.98821050722751	HTR5A	cg21256649	441	0.869578684574137	0.665463825137714	0.994179481331605	HTR2A	cg23881278	441	-1.13334505206905	0.695196913406551	0.993106697966735	PRKAR1A	cg10185667	441	0.75686665916344	0.693993380786073	0.990877270468319	HTR1E	cg13025668	441	-1.04423731874992	0.621390661275689	0.935149019366441	DDC	cg03691958	441	-2.05005833978391	0.653667478559169	0.976880114996762	POMC	cg02928916	441	0.32403793807826	0.657541712213573	0.995783333722613	POMC
cg20981893	441	-0.419600071897295	0.68288976430636	0.98821050722751	HTR2A	cg15692052	441	-0.351973147862734	0.666278692578771	0.994179481331605	CYP17A1	cg12816057	441	-0.166474294157563	0.69634226046965	0.993106697966735	DDC	cg10644575	441	-0.115432448965214	0.697952559254936	0.990877270468319	HTR1E	cg12966915	441	2.12106642620056	0.621935599170282	0.935149019366441	LEP	cg05454635	441	-0.831949795790863	0.653925316486254	0.976880114996762	HTRA3	cg03724721	441	-1.00837789994278	0.662256244413198	0.997447928181438	SRD5A2
cg23042775	441	0.170574006981173	0.683042334666317	0.98821050722751	HSD11B2	cg23809645	441	-0.227806674193385	0.66654458114942	0.994179481331605	SLC6A4	cg18442632	441	-0.206210308066546	0.696344474522189	0.993106697966735	TH	cg03560973	441	0.212940971397574	0.698421008699823	0.990877270468319	SRD5A2	cg23549160	441	-1.69755232935421	0.622062744800771	0.935149019366441	PRKAR1A	cg12580770	441	0.165212694798093	0.655750403982778	0.976880114996762	DDC	cg04750517	441	-1.25392073768154	0.663710563077184	0.997447928181438	HTRA3
cg17647537	441	-0.0964445204335202	0.685051929263685	0.98821050722751	TH	cg10777103	441	-1.16912185409794	0.669451376028216	0.994179481331605	HTR5A	cg08273233	441	0.345629130936501	0.697710931572533	0.993106697966735	SRD5A1	cg06777002	441	0.895033084431053	0.698673716680746	0.990877270468319	PROP1	cg00698685	441	-0.98402558770331	0.622421769089869	0.935149019366441	HTR6	cg15140722	441	0.221693258796928	0.656425563518298	0.976880114996762	HTRA1	cg26274946	441	-1.07814177699108	0.66520677114778	0.997447928181438	AVP
cg18146873	441	-0.865823326024386	0.686101337567391	0.98821050722751	TH	cg10045137	441	0.791802767330541	0.669743785536842	0.994179481331605	FKBP5	cg26724798	441	0.124371016903036	0.697811920243384	0.993106697966735	COMT	cg26135506	441	1.19323557212234	0.698894892255221	0.990877270468319	AVP	cg18534039	441	0.264920454716285	0.624746571479372	0.935149019366441	TH	cg03724721	441	-1.31097158078618	0.657617533959222	0.976880114996762	SRD5A2	cg08852963	441	0.423194193136034	0.665677018742718	0.997447928181438	NR3C1
cg24547396	441	0.354789302312533	0.687007057071971	0.98821050722751	SLC6A4	cg08447739	441	0.306825533166778	0.671692733467052	0.994179481331605	HTR4	cg06020661	441	0.262254962140747	0.699198305454473	0.993106697966735	HTRA3	cg05939993	441	0.181352529007542	0.700791767375724	0.990877270468319	HTRA3	cg24394631	441	0.261595269967267	0.625765190814978	0.935149019366441	SLC6A4	cg16683741	441	1.04419089136698	0.658686886527048	0.976880114996762	HTRA1	cg14349956	441	1.03201548461373	0.665876782115925	0.997447928181438	CRH
cg01462353	441	-0.219493541897963	0.689061723178051	0.98821050722751	H6PD	cg17114375	441	-0.948655049103946	0.674079685115774	0.994179481331605	HTRA1	cg03843951	441	0.260841255736731	0.700156310508041	0.993106697966735	POMC	cg17114375	441	-0.717479158775249	0.704919338372435	0.990877270468319	HTRA1	cg08273233	441	-0.651617018797661	0.625885406904332	0.935149019366441	SRD5A1	cg22059812	441	-1.80091106241691	0.659290225787337	0.976880114996762	CYP11A1	cg21298978	441	-0.423714910944256	0.666772256338678	0.997447928181438	HTR2A
cg15140722	441	-0.0983166503882521	0.689077603044584	0.98821050722751	HTRA1	cg21164131	441	0.116404068788303	0.67771502716719	0.994179481331605	HTR2A	cg03176729	441	0.173953263564337	0.701066471057701	0.993106697966735	SRD5A2	cg25190094	441	0.890219480384984	0.704986526004753	0.990877270468319	PRKAR1A	cg01975877	441	1.68746743539327	0.626799302921535	0.935149019366441	H6PD	cg14402224	441	0.552459826509638	0.659491787659128	0.976880114996762	CRH	cg19628225	441	0.232499816754084	0.67322300566521	0.998268125304863	TH
cg03176729	441	0.137205254171707	0.690262979762774	0.98821050722751	SRD5A2	cg15505103	441	0.177770164836747	0.678331056650375	0.994179481331605	HTRA1	cg14734794	441	-0.132331229666929	0.701472246126969	0.993106697966735	CRH	cg24108194	441	-1.14530653571391	0.705185135146598	0.990877270468319	CRHR1	cg21919834	441	0.68145490620168	0.632444477291955	0.935149019366441	CYP11A1	cg12966915	441	2.05593288834767	0.660225914940481	0.976880114996762	LEP	cg15001032	441	-0.310280087633219	0.67374233812015	0.998268125304863	HTR7
cg04856689	441	-0.398335263851015	0.690507863718821	0.98821050722751	NR3C2	cg18007806	441	-0.170433812429166	0.679343872669464	0.994179481331605	HTR3A	cg15001032	441	-0.235617109312719	0.701800120895933	0.993106697966735	HTR7	cg18068240	441	1.62656489906253	0.705223106483724	0.990877270468319	TH	cg14199144	441	-0.333986384197557	0.633488919083989	0.935149019366441	DDC	cg23914842	441	0.231666301128547	0.662000474460028	0.976880114996762	PRKAR1A	cg00107488	441	0.375448170412183	0.676762823749136	0.998268125304863	H6PD
cg10045137	441	-0.530204768837256	0.69207146114362	0.98821050722751	FKBP5	cg00022871	441	-0.371342268710343	0.680506386651622	0.994179481331605	HTR6	cg04607131	441	0.203694255133214	0.703608877377721	0.993106697966735	NR3C2	cg18773129	441	-0.525523522937839	0.706988149123218	0.990877270468319	TH	cg17114375	441	-1.4967998748584	0.634547545066233	0.935149019366441	HTRA1	cg04923928	441	0.308274952377004	0.663442175122694	0.976880114996762	HTRA3	cg16642545	441	0.227738468301033	0.678335697701347	0.998268125304863	HTRA1
cg06492144	441	0.108874891719366	0.694056108606798	0.98821050722751	PROP1	cg03449379	441	0.523727937836206	0.680966167656525	0.994179481331605	POMC	cg15189567	441	-0.373411952458787	0.705133166603855	0.993106697966735	HTRA1	cg19802564	441	-0.1534734346836	0.70752372192874	0.990877270468319	TPH2	cg20753294	441	-0.872010398981414	0.637053886343491	0.935149019366441	HTR2A	cg20494779	441	0.275850659185097	0.663825329529687	0.976880114996762	AVPR1A	cg24738325	441	-1.29715123098505	0.678485754952213	0.998268125304863	SLC6A4
cg03724721	441	-0.573400790384535	0.695529330278193	0.98821050722751	SRD5A2	cg10276623	441	-0.131323871373159	0.681124792381764	0.994179481331605	HTR1E	cg08473090	441	-0.37763193366217	0.705632063599163	0.993106697966735	NR3C1	cg21683009	441	-1.46715592771865	0.707786194834466	0.990877270468319	SERPINA6	cg11469319	441	1.40655105441903	0.638299095654266	0.935149019366441	CRHR2	cg03449379	441	0.824001964924502	0.664615102682585	0.976880114996762	POMC	cg26932364	441	0.401541965902648	0.679942986260467	0.998268125304863	COMT
cg11916054	441	-0.224375640437405	0.69754190582492	0.98821050722751	HTR5A	cg27051089	441	0.183094853377635	0.683338535733316	0.994179481331605	COMT	cg06751221	441	0.637509235323972	0.708210431060871	0.993106697966735	HTR4	cg00967901	441	-0.848292145561895	0.709468525686792	0.990877270468319	TBX19	cg08400935	441	0.570868493956484	0.64020024409148	0.935149019366441	NR3C1	cg24482024	441	-0.567841279817512	0.665601451698589	0.976880114996762	CRHR1	cg01516872	441	0.325377607850189	0.680506006238112	0.998268125304863	HSD11B1
cg17736230	441	-0.512917078227726	0.700825387127673	0.98821050722751	TH	cg18068240	441	-2.10335514728942	0.683619368861309	0.994179481331605	TH	cg09797446	441	0.161757229532993	0.708529889057346	0.993106697966735	HTR1E	cg01049782	441	0.190293832584219	0.710075374349959	0.990877270468319	HSD11B1	cg09201719	441	-2.27949449237378	0.640546213613755	0.935149019366441	HTR1E	cg01819552	441	0.276147065368654	0.665887682665171	0.976880114996762	H6PD	cg09576143	441	-0.323177126248279	0.682630117365982	0.998268125304863	FKBP5
cg23601416	441	0.232610959118348	0.70197834436619	0.98821050722751	CRHR1	cg24425171	441	-0.572950011625368	0.683898832663145	0.994179481331605	CRHR1	cg18603538	441	0.241829909180819	0.708617934297837	0.993106697966735	HTR3B	cg06751221	441	0.549057188673263	0.710131139116583	0.990877270468319	HTR4	cg04424630	441	2.35505752488971	0.640623797679217	0.935149019366441	HTR3C	cg16834011	441	0.660453088006817	0.66606676098771	0.976880114996762	HTR7	cg25920792	441	2.04736723310187	0.682642698578962	0.998268125304863	MC2R
cg07075299	441	-0.525258299298011	0.702010553708856	0.98821050722751	NR3C1	cg15868400	441	0.682824037969049	0.685008598966554	0.994179481331605	HTRA1	cg08915438	441	-0.354183403274397	0.710969993612387	0.993106697966735	HTR4	cg04484523	441	-0.238652016938419	0.712120245277632	0.990877270468319	HTR3C	cg06961323	441	-0.373075947736932	0.641467011054153	0.935149019366441	PROP1	cg17772763	441	0.584598261279462	0.667426047560953	0.976880114996762	HTR3A	cg19930203	441	-0.320174723108849	0.683002979925953	0.998268125304863	TPH2
cg20060666	441	-0.507557494531683	0.705957953412868	0.98821050722751	TPH2	cg27569822	441	-1.62812497542232	0.687714486922715	0.994179481331605	COMT	cg23881368	441	0.202307284230082	0.711240648534678	0.993106697966735	CRHR1	cg25271841	441	0.112136620523003	0.71251504204576	0.990877270468319	CRHR1	cg07194846	441	0.383479496451441	0.641655137038077	0.935149019366441	SRD5A1	cg06087101	441	0.368125480845211	0.66762323076545	0.976880114996762	HTRA3	cg24057680	441	-1.93179362580514	0.685776532272111	0.998268125304863	ACE
cg23035419	441	0.33470168167362	0.705990189913885	0.98821050722751	HSD11B2	cg18849621	441	-0.48433725901624	0.688273617332285	0.994179481331605	TPH1	cg06087101	441	-0.198573454078438	0.714720914036028	0.993106697966735	HTRA3	cg06521673	441	-1.3735941895773	0.713313503140999	0.990877270468319	DRD1	cg10686375	441	-3.06773899202449	0.642860027685204	0.935149019366441	HTR1E	cg18068537	441	0.578826689961095	0.672860914623429	0.978460140160377	DRD2	cg25284492	441	-1.11971826744994	0.687503564109285	0.998268125304863	CRHR1
cg21298978	441	-0.233699334509535	0.706197119123355	0.98821050722751	HTR2A	cg15001032	441	0.246439678197709	0.690926509424748	0.994179481331605	HTR7	cg20060666	441	-0.643399903465794	0.715044781226686	0.993106697966735	TPH2	cg25780543	441	-0.210371166048348	0.713470735490469	0.990877270468319	MC4R	cg24578679	441	-3.40543887155322	0.643022297588158	0.935149019366441	CRHR1	cg27130954	441	0.713528424687265	0.673467344262523	0.978460140160377	COMT	cg18998365	441	-0.271107801271089	0.687704426150833	0.998268125304863	TH
cg18584905	441	0.919680548460872	0.70648983988615	0.98821050722751	TH	cg26814075	441	0.14652394539572	0.69141653817226	0.994179481331605	COMT	cg02992588	441	0.166501238486996	0.718389745267744	0.993106697966735	DHRS9	cg21878188	441	-1.31138325385656	0.713738648461944	0.990877270468319	CYP11A1	cg09797446	441	0.299510058646428	0.643896949213332	0.935149019366441	HTR1E	cg13365022	441	0.369273804980495	0.676721648293577	0.978460140160377	AKR1D1	cg06521673	441	-2.05461158200591	0.692761983631115	0.998268125304863	DRD1
cg10468385	441	-0.184681757432551	0.707358733153144	0.98821050722751	HTR1E	cg08479865	441	0.11977978522246	0.69225722599245	0.994179481331605	PROP1	cg10276623	441	-0.108787580533159	0.720416231143846	0.993106697966735	HTR1E	cg18190187	441	0.687581740017897	0.713999168196306	0.990877270468319	HTR3A	cg11157691	441	-0.380070967926953	0.645634608472606	0.935149019366441	LEP	cg11338426	441	-1.19472185122389	0.678278448560764	0.978460140160377	DDC	cg26741280	441	0.831472938720123	0.693187276113786	0.998268125304863	COMT
cg00923860	441	-0.217740441311538	0.709051801741673	0.98821050722751	H6PD	cg23851685	441	0.19164808076789	0.693217862037908	0.994179481331605	PRKAR1A	cg03024742	441	-0.111805594666916	0.721889765318364	0.993106697966735	SRD5A2	cg03591753	441	0.234011994510404	0.717233297405799	0.990877270468319	POMC	cg05779523	441	0.291973185646114	0.647350446394163	0.935149019366441	HTRA3	cg05136169	441	1.12177041407534	0.679872932311211	0.978460140160377	HTRA3	cg14809166	441	0.236270791078748	0.695323242237336	0.998268125304863	CRH
cg18248586	441	0.170157858828876	0.710495784188726	0.98821050722751	TH	cg00446087	441	-0.565227838926005	0.694248840877026	0.994179481331605	HSD11B1	cg27549720	441	-0.188809310331575	0.722278400725794	0.993106697966735	COMT	cg11150353	441	-0.678536200484528	0.71784179423229	0.990877270468319	DDC	cg05016953	441	-3.22915028648546	0.647684960877688	0.935149019366441	NR3C2	cg06968181	441	0.688054092219536	0.680108728763724	0.978460140160377	PROP1	cg11338049	441	-0.79318363104511	0.698071610878844	0.998268125304863	DDC
cg07579946	441	0.260074414957058	0.711696800649759	0.98821050722751	NR3C1	cg06846259	441	-0.134816591004981	0.6952540105088	0.994179481331605	NR3C1	cg12583095	441	-0.638928189271082	0.723726252499096	0.993106697966735	LEP	cg00363114	441	0.159909423012675	0.720309442543161	0.990877270468319	HSD11B1	cg12751005	441	0.755303050831775	0.648838199007777	0.935149019366441	DDC	cg06961323	441	-0.343961228161844	0.681413434932718	0.978460140160377	PROP1	cg24547396	441	0.536537054578777	0.698650335865851	0.998268125304863	SLC6A4
cg11247289	441	0.218935739659254	0.71222990019091	0.98821050722751	DDC	cg16834011	441	0.400789443575766	0.695489599759229	0.994179481331605	HTR7	cg12457376	441	-0.664288691269719	0.725766005339721	0.993106697966735	DDC	cg04732193	441	-0.193781653105936	0.721060113506258	0.990877270468319	HTRA3	cg06346307	441	0.611156894839499	0.649908488191735	0.935149019366441	HTR4	cg13373360	441	-0.805687873225739	0.681566333076988	0.978460140160377	AKR1D1	cg27503360	441	0.416982321163031	0.702580461827541	0.998268125304863	COMT
cg25669230	441	0.183236706861696	0.712566105899851	0.98821050722751	MC4R	cg15912040	441	0.608280157113199	0.697883583726927	0.994179481331605	HTRA1	cg06937024	441	1.33567535408558	0.728287752988589	0.993106697966735	PROP1	cg01718447	441	0.198833534646858	0.728142446253873	0.990877270468319	H6PD	cg06087101	441	0.365406547676873	0.651818902861905	0.935149019366441	HTRA3	cg27345592	441	-0.631914601607099	0.682611595949641	0.978460140160377	COMT	cg00307530	441	-0.354645138902653	0.704901482354816	0.998268125304863	HSD3B2
cg20387815	441	0.468011545633092	0.712618867733666	0.98821050722751	AVPR1A	cg21478490	441	0.17758956447324	0.699464221751514	0.994179481331605	SERPINA6	cg13131263	441	1.13367778369996	0.729874457454754	0.993106697966735	DDC	cg21633143	441	-0.836253388163804	0.729509489600451	0.990877270468319	SERPINA6	cg09798090	441	0.296445550429256	0.65241196963578	0.935149019366441	HTR1E	cg21881537	441	-0.69011056620539	0.684960353770875	0.978460140160377	CYP11A1	cg08033551	441	0.412564416299084	0.706078199502141	0.998268125304863	NR3C1
cg22549881	441	0.0545662921117807	0.713742952563295	0.98821050722751	HSD11B2	cg16545496	441	0.39053172030053	0.702126509966989	0.994179481331605	HTRA1	cg19285508	441	0.619458432743067	0.731723520078607	0.993106697966735	DRD2	cg21901156	441	0.150839363867021	0.732353906183429	0.990877270468319	CYP11A1	cg06778429	441	-3.23775362844119	0.655485671314815	0.935149019366441	NR3C1	cg14558428	441	0.121390601152129	0.685646934125147	0.978460140160377	CRH	cg08372315	441	0.287506392618441	0.707536712523961	0.998268125304863	NR3C1
cg04199256	441	0.294151093602769	0.714112722772221	0.98821050722751	DRD3	cg12580770	441	-0.0941129849506495	0.702855760168572	0.994179481331605	DDC	cg02534661	441	0.729291281131213	0.73504337642838	0.993106697966735	DHRS9	cg12758687	441	-0.141710908586921	0.732998525964268	0.990877270468319	LEP	cg10874403	441	-0.251911463107005	0.656659084920311	0.935149019366441	CRHR2	cg24877195	441	1.40477062094177	0.686244843229117	0.978460140160377	ACE	cg17805199	441	-0.532520727612913	0.709017137152198	0.998268125304863	DRD2
cg00446087	441	-0.389600157776734	0.714144199698824	0.98821050722751	HSD11B1	cg24108194	441	-1.37093292822638	0.706758149475065	0.994179481331605	CRHR1	cg02131967	441	-1.4062490636007	0.736046643340066	0.993106697966735	HTR6	cg20060666	441	-0.522924267837603	0.733382326748244	0.990877270468319	TPH2	cg08789908	441	1.95036784022376	0.658659417975596	0.935149019366441	NR3C1	cg07464571	441	-0.317742663329515	0.686710135508154	0.978460140160377	HTR4	cg03843951	441	0.302653037207849	0.709858863936612	0.998268125304863	POMC
cg01962937	441	-0.779365907706162	0.715586277999239	0.98821050722751	H6PD	cg08473090	441	-0.407919682671962	0.70765542948131	0.994179481331605	NR3C1	cg11111332	441	0.211794915003835	0.736629727440188	0.993106697966735	CRHR2	cg13051970	441	-0.18933242137177	0.734209993164222	0.990877270468319	DDC	cg21796427	441	-0.867738964756958	0.659010785367627	0.935149019366441	CYP11A1	cg15835825	441	-0.68065145200559	0.687632015242362	0.978460140160377	HTRA1	cg10930664	441	-0.449676240866666	0.711960371323753	0.998268125304863	CRHR2
cg12440040	441	-0.0734789359350194	0.716116226074193	0.98821050722751	LEP	cg02079741	441	0.222273892024724	0.708771179944716	0.994179481331605	HSD11B1	cg10045137	441	-0.57999819652617	0.73798251570479	0.993106697966735	FKBP5	cg23881368	441	0.162258866105121	0.736093700098027	0.990877270468319	CRHR1	cg06521673	441	-2.83349025455029	0.659748298389412	0.935149019366441	DRD1	cg26948603	441	1.22157630314493	0.688644500819396	0.978460140160377	COMT	cg11111332	441	-0.276670222706826	0.716987998558001	0.998268125304863	CRHR2
cg18773997	441	-0.163488169307847	0.716299094777671	0.98821050722751	DRD2	cg26656751	441	-0.275452695477491	0.711950796800106	0.994179481331605	COMT	cg07275757	441	0.134655319548433	0.738521545285032	0.993106697966735	DRD1	cg15003182	441	0.233800344338827	0.736879105911935	0.990877270468319	HTRA1	cg00862770	441	-2.60251469513882	0.66061849137167	0.935149019366441	HSD11B1	cg01975877	441	1.45236226107467	0.692574740297449	0.97943156421186	H6PD	cg18283321	441	-0.365133949184365	0.717191836524494	0.998268125304863	HTR3A
cg04424630	441	-0.945132753519118	0.718225552263767	0.98821050722751	HTR3C	cg22812013	441	0.377057087659836	0.712833212757458	0.994179481331605	HSD11B2	cg04732193	441	-0.203875300663123	0.741782571916983	0.993106697966735	HTRA3	cg01462353	441	0.210787301172462	0.73813670617074	0.990877270468319	H6PD	cg23185751	441	0.324597013681802	0.660787389671083	0.935149019366441	CRHR1	cg26638505	441	-0.170885475635067	0.693779483919455	0.97943156421186	COMT	cg20629239	441	0.692860575580704	0.717605337299206	0.998268125304863	TPH2
cg02299946	441	0.649534395583116	0.718538058624973	0.98821050722751	POMC	cg18773129	441	-0.607247355550203	0.719536946751191	0.994179481331605	TH	cg16830379	441	0.189754223797826	0.747609250547183	0.993106697966735	HTRA1	cg00446087	441	-0.405061081306181	0.738497788152219	0.990877270468319	HSD11B1	cg06531741	441	-0.290029132294409	0.661973694415646	0.935149019366441	NR3C1	cg14174946	441	0.177926526082229	0.694014358052523	0.97943156421186	DDC	cg08573687	441	-0.119758314844148	0.720482582175539	0.998268125304863	SRD5A1
cg19194405	441	0.293396156211324	0.718956527809978	0.98821050722751	TH	cg26033657	441	0.435756428381349	0.722227058676863	0.994179481331605	AVP	cg04750517	441	0.783044149408218	0.748318399344283	0.993106697966735	HTRA3	cg09914773	441	-0.199328186074046	0.739099927648102	0.990877270468319	FKBP5	cg06020661	441	0.447658681364788	0.665221215478484	0.935756081959031	HTRA3	cg12751005	441	-0.664210560027478	0.69647466091207	0.97943156421186	DDC	cg00269606	441	0.143141610614711	0.72309335418531	0.998268125304863	HTR6
cg19530293	441	0.091881401923897	0.719604741724614	0.98821050722751	TH	cg27410679	441	-0.272708044484138	0.722838580962892	0.994179481331605	COMT	cg09147827	441	-0.0913803043079009	0.748506381971269	0.993106697966735	FKBP5	cg15910486	441	0.553474634240461	0.740982802985314	0.990877270468319	HTRA1	cg09672383	441	0.203887091239467	0.666471638161233	0.935756081959031	FKBP5	cg02665568	441	-0.721641020790523	0.698433935475643	0.97943156421186	DHRS9	cg07275757	441	-0.171580451390314	0.724233997747652	0.998268125304863	DRD1
cg18849621	441	-0.316760778797169	0.720280762054231	0.98821050722751	TPH1	cg18954700	441	1.72930014047113	0.724622507853779	0.994179481331605	DRD2	cg02577436	441	-0.515732927856904	0.751522411622732	0.993106697966735	DHRS9	cg18534039	441	-0.105297569155376	0.742046389025068	0.990877270468319	TH	cg01335087	441	-0.587818931800315	0.668633840173778	0.935756081959031	H6PD	cg14199144	441	0.283892743726357	0.698960153822937	0.97943156421186	DDC	cg06777002	441	1.13823363045923	0.724370502015521	0.998268125304863	PROP1
cg15505103	441	-0.111608987111147	0.720664591534193	0.98821050722751	HTRA1	cg14754494	441	-0.240334728239403	0.724903986143731	0.994179481331605	CYP11B1	cg01614101	441	-0.0978030320200018	0.753701105365171	0.993106697966735	H6PD	cg13069918	441	0.185822662916278	0.742951996984663	0.990877270468319	DDC	cg09366519	441	-0.305709041803329	0.6692771271316	0.935756081959031	FKBP5	cg07304526	441	-0.750516034455531	0.69906260365598	0.97943156421186	PROP1	cg07733851	441	-0.401275978605446	0.726032891252309	0.998268125304863	NR3C1
cg06968181	441	0.288883236995366	0.722995237561688	0.98821050722751	PROP1	cg18584905	441	1.16965988374536	0.726437193625465	0.994179481331605	TH	cg04443360	441	0.138982112089442	0.754657916767814	0.993106697966735	HTR3C	cg21702128	441	-0.0582247527513865	0.743499954220739	0.990877270468319	CYP11A1	cg01459748	441	-0.429573734140142	0.673465583335063	0.935756081959031	HTR6	cg25114611	441	-0.402434878800375	0.701197880701299	0.97943156421186	SLC6A4	cg12807275	441	0.210455474842757	0.729023125074161	0.998268125304863	DDC
cg12243453	441	-0.197503567018259	0.725461985526418	0.98821050722751	DDC	cg00454577	441	0.700583552677489	0.728232115115492	0.994179481331605	TBX19	cg15692052	441	-0.241603689814898	0.755112411636035	0.993106697966735	CYP17A1	cg26126367	441	0.397577400229402	0.744444836356076	0.990877270468319	AVP	cg00674304	441	1.39373921395164	0.673853392364264	0.935756081959031	H6PD	cg05082563	441	-0.311525095752706	0.701304937961481	0.97943156421186	HTRA3	cg07778819	441	-0.1283987890649	0.730872919920092	0.998268125304863	DRD1
cg19826045	441	-0.419883442073774	0.725513671298694	0.98821050722751	AVPR1A	cg10468385	441	-0.232952509170707	0.728624995477464	0.994179481331605	HTR1E	cg08447739	441	-0.214056828615686	0.756897175111328	0.993106697966735	HTR4	cg18283321	441	-0.235679748927493	0.744519771443992	0.990877270468319	HTR3A	cg13781869	441	-0.497350078934759	0.674483148186976	0.935756081959031	LEP	cg18954700	441	-2.78584569708348	0.703631880923215	0.980820197650543	DRD2	cg09714615	441	0.108235103387884	0.731059445334877	0.998268125304863	HTR1E
cg25725890	441	-0.934969801403207	0.727108426839467	0.98821050722751	MC2R	cg14127947	441	-0.187669616945085	0.731038095425828	0.994179481331605	AKR1D1	cg01714756	441	-0.180567116658112	0.75835536134164	0.993106697966735	H6PD	cg01294490	441	0.434208098709777	0.745734964268338	0.990877270468319	H6PD	cg27528351	441	0.451993555932251	0.674665966154735	0.935756081959031	COMT	cg23185751	441	-0.292450359187374	0.707294597338874	0.981871497091327	CRHR1	cg07833420	441	0.26117691931115	0.73153829109785	0.998268125304863	DRD1
cg00293936	441	0.54893069489317	0.730413438507753	0.98821050722751	HTR6	cg23185751	441	-0.17803309680401	0.731929330524659	0.994179481331605	CRHR1	cg18007806	441	0.12009240089378	0.75916548345165	0.993106697966735	HTR3A	cg14174946	441	-0.0809810380605289	0.746370892241795	0.990877270468319	DDC	cg07843056	441	2.11996075382973	0.674680906713544	0.935756081959031	SRD5A1	cg14418802	441	0.623060636330595	0.709256712633285	0.981871497091327	CYP11B1	cg06952416	441	-0.350932387909683	0.734170922958828	0.998268125304863	HTR4
cg27304079	441	-0.85433947166357	0.731114449627775	0.98821050722751	COMT	cg18865272	441	0.624004372668217	0.73313047508346	0.994179481331605	DRD2	cg17307280	441	0.869969047294782	0.759584230021184	0.993106697966735	HTR3A	cg02534661	441	0.597909684352509	0.74913724107677	0.990877270468319	DHRS9	cg04042861	441	0.375247730016077	0.677556559875549	0.935756081959031	POMC	cg10644575	441	-0.197160739440974	0.709925547204812	0.981871497091327	HTR1E	cg20178075	441	-0.140108353148563	0.734975542989775	0.998268125304863	AVPR1A
cg19930203	441	0.171331538398748	0.731819928532104	0.98821050722751	TPH2	cg12908660	441	0.172680948909421	0.733782666071383	0.994179481331605	HTR5A	cg24108194	441	-1.05180764995998	0.760215859622434	0.993106697966735	CRHR1	cg15615793	441	0.123192175159338	0.750053868394402	0.990877270468319	HTRA1	cg06846259	441	0.205215867195397	0.678116718265708	0.935756081959031	NR3C1	cg00454577	441	1.09632932288597	0.712926920795485	0.981871497091327	TBX19	cg03216867	441	-0.301758923940897	0.735521224965818	0.998268125304863	POMC
cg07528216	441	-0.138194417292904	0.732569413213133	0.98821050722751	NR3C1	cg00923860	441	-0.269868522561544	0.734367563865958	0.994179481331605	H6PD	cg01586609	441	0.11721543151707	0.76049848218643	0.993106697966735	HTR6	cg21080473	441	-0.105832214843134	0.750778760767022	0.990877270468319	HTR2A	cg25121146	441	-0.146031645130917	0.683167825009143	0.935756081959031	PRKAR1A	cg25725890	441	-2.08276306908195	0.714385141874815	0.981871497091327	MC2R	cg21080473	441	0.154467351058021	0.73572882851002	0.998268125304863	HTR2A
cg13781869	441	0.210904355880578	0.734081756517482	0.98821050722751	LEP	cg23791011	441	0.48589977506439	0.73550227393912	0.994179481331605	ACE	cg21671386	441	-0.310566834546992	0.762005993917369	0.993106697966735	SERPINA6	cg06968181	441	-0.294117729325358	0.753114962078444	0.990877270468319	PROP1	cg10288772	441	1.40445654156264	0.684534850994757	0.935756081959031	FKBP5	cg13499155	441	0.228705694128817	0.715401288396096	0.981871497091327	HTR5A	cg15910486	441	0.79068000922841	0.736438492805894	0.998268125304863	HTRA1
cg03279206	441	0.130662431707188	0.734195556840501	0.98821050722751	SRD5A2	cg17805199	441	0.418042096494998	0.737043062090343	0.994179481331605	DRD2	cg01462353	441	-0.216800220057445	0.762352612325013	0.993106697966735	H6PD	cg23791011	441	0.380596354305058	0.754318396002487	0.990877270468319	ACE	cg12670061	441	-2.58840487404134	0.685153668742108	0.935756081959031	CRHR2	cg26720913	441	0.6592654557161	0.715719378576994	0.981871497091327	COMT	cg18785742	441	0.722777424505315	0.738287228894771	0.998268125304863	DRD2
cg26160839	441	0.115929943322691	0.734267084787918	0.98821050722751	AVP	cg21683009	441	-1.56994163281688	0.737904622236651	0.994179481331605	SERPINA6	cg00363114	441	0.153676694725105	0.763350777565049	0.993106697966735	HSD11B1	cg01819552	441	-0.112266884128396	0.754696599556181	0.990877270468319	H6PD	cg02992588	441	0.279682589800997	0.68654325488571	0.935756081959031	DHRS9	cg09914773	441	-0.391050075460983	0.716174662411073	0.981871497091327	FKBP5	cg19730798	441	-1.37987858562739	0.743590694769708	0.998268125304863	TPH2
cg18534039	441	0.0943974321466376	0.735889836312692	0.98821050722751	TH	cg05952120	441	0.733710812452301	0.73841794171257	0.994179481331605	HTRA3	cg25190094	441	-0.807249960909812	0.763558130122597	0.993106697966735	PRKAR1A	cg02712145	441	-0.20241192871037	0.756681448207828	0.990877270468319	SRD5A2	cg18757974	441	-1.22721124321382	0.688038665242659	0.935756081959031	DRD2	cg13781869	441	0.468437537946763	0.717130309981841	0.981871497091327	LEP	cg10741760	441	-0.11659052889847	0.745470886522488	0.998268125304863	LEP
cg27090784	441	0.369510268522872	0.737850816602015	0.98821050722751	COMT	cg23757489	441	0.143510403061545	0.739561638576398	0.994179481331605	ACE	cg12516059	441	0.0568719589872579	0.764240840782211	0.993106697966735	HTR5A	cg21330703	441	0.52297208188365	0.756900469448578	0.990877270468319	SERPINA6	cg10300814	441	-1.05782515010736	0.69205549467364	0.935756081959031	FKBP5	cg03363743	441	0.379990095311587	0.718491257666572	0.981871497091327	SRD5A2	cg26344168	441	0.0849714633032751	0.745680092417088	0.998268125304863	AVP
cg21224972	441	0.0958487927471148	0.739471545641978	0.98821050722751	HTR2A	cg25551168	441	0.341259292828859	0.739908050874494	0.994179481331605	MC2R	cg18998365	441	-0.166185207062288	0.764626001157169	0.993106697966735	TH	cg01586609	441	-0.10410983176613	0.757464097683514	0.990877270468319	HTR6	cg25284492	441	1.34585073311188	0.692933235689824	0.935756081959031	CRHR1	cg12457376	441	-1.03026607942946	0.722969690684999	0.981871497091327	DDC	cg02318454	441	-0.164399876150007	0.749190417847434	0.998268125304863	POMC
cg25920792	441	1.05161807788534	0.739503348119093	0.98821050722751	MC2R	cg23881278	441	1.01478480531596	0.740106484061232	0.994179481331605	PRKAR1A	cg16188532	441	-0.280820712192277	0.764924155918971	0.993106697966735	HTRA1	cg19837528	441	0.218914279510653	0.757928320578183	0.990877270468319	AVPR1A	cg10650018	441	0.148479078242658	0.693010906027103	0.935756081959031	FKBP5	cg19303305	441	0.422235611778585	0.724099916302949	0.981871497091327	TH	cg25022311	441	0.163545684465136	0.749886024629077	0.998268125304863	CRHR1
cg04923928	441	0.113605619261159	0.7398545255395	0.98821050722751	HTRA3	cg03216867	441	-0.256384965155091	0.740327409913592	0.994179481331605	POMC	cg08791953	441	-0.107346891009774	0.767353840189169	0.993106697966735	NR3C1	cg24610236	441	0.171346354908412	0.758970264357793	0.990877270468319	ACE	cg26466234	441	0.96958900141432	0.69348370826127	0.935756081959031	AVP	cg15001032	441	-0.329799037834692	0.725958641058278	0.981871497091327	HTR7	cg00674304	441	0.84610721154232	0.751334871823375	0.998268125304863	H6PD
cg12715421	441	-0.143024257748151	0.740613863964666	0.98821050722751	DDC	cg12017635	441	0.183636123912692	0.740370128999071	0.994179481331605	DDC	cg19815720	441	0.133994330834222	0.770304466730809	0.993106697966735	TPH2	cg27503360	441	-0.236180733680582	0.761171975251916	0.990877270468319	COMT	cg19730798	441	2.04430969161667	0.693710863980176	0.935756081959031	TPH2	cg12243453	441	-0.401341814701541	0.72627383154009	0.981871497091327	DDC	cg05952120	441	-0.81003907901484	0.75283728622645	0.998268125304863	HTRA3
cg06778429	441	1.22105881883527	0.741791848615901	0.98821050722751	NR3C1	cg22442841	441	0.364469577617801	0.741816177964401	0.994179481331605	CYP11A1	cg16692923	441	0.27357330403576	0.770763257291763	0.993106697966735	CYP17A1	cg26656751	441	-0.188004773724252	0.762787144535376	0.990877270468319	COMT	cg18248586	441	0.354433738542825	0.694237673078336	0.935756081959031	TH	cg02955911	441	0.908909535577037	0.73052243233241	0.981871497091327	POMC	cg16692923	441	0.356659196787975	0.7553942608282	0.998268125304863	CYP17A1
cg23409074	441	0.0800265358591702	0.742571473590888	0.98821050722751	ACE	cg08560888	441	-0.169672197300518	0.742128376190433	0.994179481331605	NR3C1	cg01459748	441	-0.198624082181	0.771333416963059	0.993106697966735	HTR6	cg22186216	441	0.175311415502866	0.7627881171675	0.990877270468319	CYP11A1	cg27640254	441	-0.406708787197419	0.694323245258796	0.935756081959031	COMT	cg23042775	441	0.291914519757401	0.731151736555452	0.981871497091327	HSD11B2	cg24134767	441	0.214458996501942	0.75541739078057	0.998268125304863	CRHR1
cg15615793	441	0.111618699812931	0.743348270884175	0.98821050722751	HTRA1	cg02965092	441	0.145100112618611	0.742602043412769	0.994179481331605	POMC	cg02579332	441	0.081336432696818	0.771387177407432	0.993106697966735	SRD5A2	cg07425204	441	-0.200807114700887	0.7628405208135	0.990877270468319	HTR4	cg10097150	441	-0.191738772540322	0.694642746716954	0.935756081959031	FKBP5	cg15615793	441	0.237802508304612	0.731557368372312	0.981871497091327	HTRA1	cg21919834	441	0.354593401631199	0.757207970881475	0.998268125304863	CYP11A1
cg02577436	441	-0.406601484952177	0.746210937017568	0.98821050722751	DHRS9	cg16683741	441	-0.522193704205103	0.742755272533399	0.994179481331605	HTRA1	cg18200810	441	-0.159208532318663	0.772994279677469	0.993106697966735	HTR3B	cg21298978	441	-0.21146194580737	0.763827385239023	0.990877270468319	HTR2A	cg27090784	441	-0.846303521538913	0.697007716703678	0.935756081959031	COMT	cg00603617	441	2.24175549094112	0.734480830096124	0.981871497091327	H6PD	cg09318122	441	-0.131680302620643	0.758117475086465	0.998268125304863	FKBP5
cg01972879	441	-0.0878025671863676	0.746979271764765	0.98821050722751	HTR6	cg21905167	441	0.387428900492961	0.744547632765007	0.994179481331605	CYP11A1	cg05016953	441	1.31605797367457	0.775930232649169	0.993106697966735	NR3C2	cg19125767	441	-0.175093053834394	0.764045885451561	0.990877270468319	DRD2	cg15600279	441	0.266463271227994	0.697564109813146	0.935756081959031	HTRA1	cg24164005	441	0.469767534067202	0.734767710134426	0.981871497091327	CRHR1	cg04987827	441	-1.77006989880147	0.758253762817077	0.998268125304863	NR3C2
cg26948603	441	-0.470981498407988	0.74956120690059	0.98821050722751	COMT	cg21661983	441	-0.212603830075243	0.745902973039976	0.994179481331605	SERPINA6	cg00603617	441	1.18302608428149	0.77679421649452	0.993106697966735	H6PD	cg04863452	441	0.221628226936756	0.764954734389718	0.990877270468319	NR3C2	cg15001032	441	-0.354324975551565	0.69866635001352	0.935756081959031	HTR7	cg25535999	441	-0.35255247044343	0.73532080468128	0.981871497091327	SLC6A4	cg02037013	441	0.109362318084705	0.758900808968335	0.998268125304863	H6PD
cg22584138	441	0.142557474768236	0.75018107997217	0.98821050722751	HSD11B2	cg08791953	441	0.123421266480875	0.746116046975823	0.994179481331605	NR3C1	cg13094036	441	-0.162642153270057	0.783360814437598	0.993106697966735	LEP	cg14094793	441	0.491017725192377	0.767109045009065	0.990877270468319	HTR5A	cg25054907	441	-1.71750128549872	0.699663636471123	0.935756081959031	CRHR1	cg23720528	441	0.199066846834968	0.736286382550053	0.981871497091327	SLC6A4	cg08791953	441	-0.134704862485812	0.759486425640238	0.998268125304863	NR3C1
cg15607306	441	0.118437119767117	0.750420348272982	0.98821050722751	HTRA1	cg17342132	441	0.312618883584243	0.746287695902613	0.994179481331605	HTR3B	cg14325092	441	-0.193111510764967	0.783391652133056	0.993106697966735	CYP11B1	cg22701672	441	0.427052969180782	0.767567258619304	0.990877270468319	HSD11B2	cg21330703	441	1.1291117272334	0.70009489938445	0.935756081959031	SERPINA6	cg17537380	441	-0.192639433756482	0.741005619356156	0.981871497091327	HTR3B	cg00698685	441	-0.482116560611737	0.76043969628964	0.998268125304863	HTR6
cg22059812	441	-0.629018897880949	0.751006973584758	0.98821050722751	CYP11A1	cg14059288	441	-0.459384560095854	0.746328851747607	0.994179481331605	HTR5A	cg03570920	441	0.0584493959447936	0.78596773913937	0.993106697966735	SRD5A2	cg14127947	441	-0.134206602901501	0.767654630213625	0.990877270468319	AKR1D1	cg00025823	441	0.248955982792206	0.701511671561601	0.935756081959031	H6PD	cg24610236	441	0.342807734764099	0.741784926294331	0.981871497091327	ACE	cg25121146	441	0.0879099805150893	0.761491347226983	0.998268125304863	PRKAR1A
cg26135506	441	0.859943330196275	0.75122747320012	0.98821050722751	AVP	cg00363114	441	0.171334415707573	0.749203577481076	0.994179481331605	HSD11B1	cg09516959	441	-0.111712051135785	0.786320450706211	0.993106697966735	HTR1E	cg22812013	441	0.248691220363019	0.767769099415237	0.990877270468319	HSD11B2	cg01581781	441	-0.206758401128715	0.70239280092342	0.935756081959031	TBX19	cg04490037	441	0.263494442262824	0.742098031457784	0.981871497091327	DRD3	cg06623827	441	-0.178746298331457	0.762167074544758	0.998268125304863	HTR4
cg14065127	441	0.150868337605632	0.752714204871564	0.98821050722751	LEP	cg10323433	441	-0.136034238511398	0.749267975015668	0.994179481331605	FKBP5	cg26321066	441	0.10309958376904	0.78719697570966	0.993106697966735	AVP	cg02322203	441	-0.284196280996261	0.76854211419123	0.990877270468319	POMC	cg01819552	441	0.233574382918307	0.703285722097451	0.935756081959031	H6PD	cg24134767	441	0.2904747542525	0.744325606684211	0.981871497091327	CRHR1	cg23598419	441	0.384796407577798	0.763226874903117	0.998268125304863	ACE
cg20967585	441	-0.0693588223332587	0.752907346047695	0.98821050722751	HTR2A	cg06828613	441	-0.147688364479762	0.751222701014338	0.994179481331605	NR3C1	cg00862770	441	-1.05771509022469	0.788293878113386	0.993106697966735	HSD11B1	cg25836061	441	-0.302442887848567	0.768743726139899	0.990877270468319	MC4R	cg19826045	441	-0.876961186403402	0.704675017239672	0.935756081959031	AVPR1A	cg27569822	441	-1.97803500785357	0.74476470912844	0.981871497091327	COMT	cg08215831	441	-0.128035559794542	0.765095169382369	0.998268125304863	NR3C1
cg14170547	441	0.145117680090966	0.753012285613458	0.98821050722751	LEP	cg14065127	441	-0.209279223930309	0.751474861741425	0.994179481331605	LEP	cg26160839	441	-0.118284912475872	0.789643795637071	0.993106697966735	AVP	cg07863439	441	-0.468884573089755	0.769407240062646	0.990877270468319	NR3C1	cg21141047	441	1.47210094113882	0.705631284629432	0.935756081959031	HTR2A	cg16642545	441	0.230650638526838	0.744888730362824	0.981871497091327	HTRA1	cg00903099	441	0.130225068702086	0.76608269848474	0.998268125304863	H6PD
cg07658503	441	0.24377922721549	0.753112709171197	0.98821050722751	DRD1	cg07485685	441	1.23070318796663	0.754410010556757	0.994179481331605	SRD5A1	cg17114375	441	-0.581122257827234	0.790085296976522	0.993106697966735	HTRA1	cg18755984	441	0.10559431929739	0.769908239620524	0.990877270468319	TH	cg04856117	441	0.55300815120613	0.707937582089171	0.937126007945378	NR3C2	cg06860277	441	0.388945706238093	0.744921320226915	0.981871497091327	NR3C1	cg27410679	441	-0.261059209542681	0.768189660625432	0.998268125304863	COMT
cg14734794	441	0.0836925534059202	0.755154298858921	0.98821050722751	CRH	cg24164005	441	-0.285209809643215	0.755444683897679	0.994179481331605	CRHR1	cg20813374	441	-0.193226686147886	0.790353723092969	0.993106697966735	HTR2A	cg06860277	441	-0.196068329170477	0.771314772803314	0.990877270468319	NR3C1	cg17875135	441	-0.846220923606126	0.710754417000476	0.939165621027559	HTR3A	cg06417522	441	1.69641457870501	0.748296902077473	0.981871497091327	NR3C1	cg23042775	441	0.193817343391419	0.769134143487168	0.998268125304863	HSD11B2
cg19035496	441	0.106523314513781	0.756432892295592	0.98821050722751	DRD2	cg11423517	441	-0.150463506070349	0.755858529620364	0.994179481331605	DDC	cg21683009	441	-1.17633732027032	0.792755748334648	0.993106697966735	SERPINA6	cg03570920	441	-0.0544946180536095	0.772276656667671	0.990877270468319	SRD5A2	cg01220564	441	0.463864345385837	0.713724405962997	0.941234340440126	H6PD	cg25190094	441	-1.32565776291996	0.74881225451239	0.981871497091327	PRKAR1A	cg16844661	441	-0.226538155236869	0.772595479331403	0.998268125304863	HTRA1
cg15719652	441	-0.210002579970124	0.75693227936992	0.98821050722751	HTR7	cg04732193	441	-0.200826929245703	0.758569228170584	0.994179481331605	HTRA3	cg23809645	441	0.132386165441969	0.792997626893039	0.993106697966735	SLC6A4	cg16335926	441	0.521581535206423	0.77604642228443	0.990877270468319	HTRA1	cg24738325	441	1.4124706492942	0.715410331222602	0.941234340440126	SLC6A4	cg25017777	441	0.818360193728276	0.749929817999417	0.981871497091327	ACE	cg10650018	441	0.0881938613639984	0.773359226422639	0.998268125304863	FKBP5
cg16683741	441	0.3611199715013	0.757298841870205	0.98821050722751	HTRA1	cg26880525	441	0.333185240541383	0.760134671545028	0.994179481331605	COMT	cg06968181	441	-0.279384305454223	0.793450553726055	0.993106697966735	PROP1	cg00310588	441	0.124205406421461	0.777894464107965	0.990877270468319	HSD11B1	cg27549720	441	0.280719179481021	0.716156563378356	0.941234340440126	COMT	cg27068143	441	0.244108051317384	0.750122044184166	0.981871497091327	COMT	cg15868400	441	0.552843636702848	0.773664015273936	0.998268125304863	HTRA1
cg27208536	441	-0.128459281679554	0.759181312798147	0.98821050722751	COMT	cg23914842	441	-0.108210328698059	0.762297132278911	0.994179481331605	PRKAR1A	cg00967901	441	0.682533104738959	0.793730145800085	0.993106697966735	TBX19	cg11247289	441	-0.190640073774563	0.779954687072053	0.990877270468319	DDC	cg24134767	441	0.300005990501141	0.724469510420918	0.949211014226611	CRHR1	cg08929103	441	0.25492061851635	0.750244202223453	0.981871497091327	NR3C1	cg05016953	441	-1.629255368796	0.774725051460195	0.998268125304863	NR3C2
cg23329208	441	-0.122316450103824	0.759284782246281	0.98821050722751	SLC6A4	cg00107488	441	0.236820148976171	0.762485188499527	0.994179481331605	H6PD	cg26332534	441	0.883654147303607	0.796138002713433	0.993106697966735	AVP	cg24105933	441	-0.398785448859117	0.78085416381362	0.990877270468319	SLC6A4	cg09527270	441	0.246884204237252	0.724805149450211	0.949211014226611	FKBP5	cg07102705	441	0.154531142756531	0.755447181923961	0.981871497091327	HTR4	cg19491599	441	0.193599221381478	0.774964400488848	0.998268125304863	DRD2
cg26033657	441	0.275505943054744	0.760500312038405	0.98821050722751	AVP	cg21240762	441	-1.36818213374336	0.763780898326883	0.994179481331605	HTR2A	cg13365022	441	0.145556599975822	0.797375209178528	0.993106697966735	AKR1D1	cg02131967	441	-1.012749886073	0.78118236880863	0.990877270468319	HTR6	cg06291867	441	0.385237785257897	0.728053320560361	0.951771303609992	DRD1	cg00862770	441	1.90692055699881	0.755632069226853	0.981871497091327	HSD11B1	cg15615793	441	0.154039253648118	0.776227821004264	0.998268125304863	HTRA1
cg15001032	441	-0.141037004000651	0.76086818487825	0.98821050722751	HTR7	cg06968181	441	-0.33691716969347	0.764504515797007	0.994179481331605	PROP1	cg01192538	441	-0.103580515038244	0.799536824694579	0.993106697966735	H6PD	cg27068143	441	-0.119604922103185	0.781526824319745	0.990877270468319	COMT	cg19125767	441	-0.342253101336771	0.731910674268441	0.953631498546636	DRD2	cg17723156	441	0.298090906557938	0.755741817266992	0.981871497091327	TH	cg23612570	441	-0.209096027296408	0.779737468533004	0.998268125304863	PRKAR1A
cg15645634	441	-0.877944077054238	0.760980742015271	0.98821050722751	HTR7	cg12966915	441	-1.0015238847515	0.765422232425242	0.994179481331605	LEP	cg02711929	441	-0.147217877476651	0.804579968220904	0.993106697966735	SRD5A2	cg16683741	441	-0.365985536747577	0.782568865942402	0.990877270468319	HTRA1	cg08389266	441	0.250104546380798	0.732347087574126	0.953631498546636	NR3C1	cg01732037	441	0.24349650185217	0.755981099226866	0.981871497091327	H6PD	cg11750900	441	-0.659612794706061	0.780488930166842	0.998268125304863	DDC
cg19837528	441	-0.17946068177143	0.763180460129829	0.98821050722751	AVPR1A	cg08929103	441	0.163156853068222	0.765905668666818	0.994179481331605	NR3C1	cg10205430	441	0.173779462625683	0.805342382347083	0.993106697966735	FKBP5	cg21478490	441	0.104496360236351	0.784473281708256	0.990877270468319	SERPINA6	cg12782180	441	0.235022798100034	0.733363353501897	0.953631498546636	CRHR2	cg27051089	441	0.206591963544942	0.757983711231021	0.981871497091327	COMT	cg25780543	441	0.223331992666875	0.781389508214065	0.998268125304863	MC4R
cg10777103	441	0.605707523275541	0.763333592515143	0.98821050722751	HTR5A	cg23570923	441	0.353070404317443	0.767068059214522	0.994179481331605	SLC6A4	cg15888097	441	-0.0744811801038276	0.807204076648865	0.993106697966735	HTR7	cg22458194	441	0.629956768862946	0.785360704514506	0.990877270468319	CYP11A1	cg13251292	441	-0.174002703451893	0.73519110297789	0.954322137198813	DDC	cg25271841	441	-0.167270785585547	0.758116677305855	0.981871497091327	CRHR1	cg10216820	441	0.243800487704997	0.781413730269967	0.998268125304863	FKBP5
cg09914773	441	-0.157282903947029	0.765585115811134	0.98821050722751	FKBP5	cg04863452	441	0.25985532828558	0.770623870521126	0.994179481331605	NR3C2	cg07863439	441	-0.447201429223105	0.807654740233425	0.993106697966735	NR3C1	cg15140722	441	-0.0763600442928353	0.785443725250486	0.990877270468319	HTRA1	cg15719652	441	0.462134244023194	0.737200770135778	0.955246068344952	HTR7	cg07658503	441	0.491337128871754	0.759858112278784	0.981871497091327	DRD1	cg09394608	441	-0.237457789113004	0.782618839433094	0.998268125304863	FKBP5
cg19354750	441	-0.51584807810858	0.767069785643769	0.98821050722751	HTR3A	cg09527270	441	-0.144210197384271	0.771211084140824	0.994179481331605	FKBP5	cg01489398	441	-0.144535794357347	0.809068201709109	0.993106697966735	TBX19	cg23035419	441	-0.272392319090088	0.786485419700492	0.990877270468319	HSD11B2	cg14170547	441	0.300203674622527	0.73953152863399	0.95658208273219	LEP	cg01459748	441	0.324379150880007	0.760119686686675	0.981871497091327	HTR6	cg06291867	441	-0.251332543111823	0.783457234462898	0.998268125304863	DRD1
cg06291867	441	0.169213236814207	0.769016561300733	0.98821050722751	DRD1	cg19457823	441	-0.161406258744526	0.771625136156658	0.994179481331605	TH	cg06149357	441	-0.0654766402401779	0.809924121953705	0.993106697966735	HTRA3	cg03363743	441	-0.156506504136069	0.788425102956155	0.990877270468319	SRD5A2	cg18785742	441	-0.852893793458312	0.743793905282918	0.95703805624586	DRD2	cg03176729	441	0.211984083650373	0.761680433073072	0.981871497091327	SRD5A2	cg23753947	441	-0.381962897081558	0.78400972341766	0.998268125304863	SLC6A4
cg06087101	441	0.120221829133621	0.771400072014749	0.98821050722751	HTRA3	cg10650018	441	-0.0768507977337387	0.77298474416992	0.994179481331605	FKBP5	cg18146873	441	0.65442987293284	0.810675866497091	0.993106697966735	TH	cg23913482	441	-0.653153429447277	0.790625555861302	0.990877270468319	CRHR1	cg11338426	441	0.901405494984038	0.74546720848792	0.95703805624586	DDC	cg17085721	441	-1.43128045917449	0.761750848966234	0.981871497091327	HTRA1	cg07485685	441	1.25337252747738	0.784612960074874	0.998268125304863	SRD5A1
cg09122657	441	-0.958880149661613	0.771990980603526	0.98821050722751	HTR1E	cg09920557	441	-1.12413499387934	0.773353709195244	0.994179481331605	HTR1E	cg09576143	441	0.157996907977908	0.811025152699483	0.993106697966735	FKBP5	cg04360210	441	0.180339746077669	0.791579171663461	0.990877270468319	DRD3	cg12248358	441	-0.252036941785338	0.747650823933907	0.95703805624586	HTR5A	cg06952416	441	0.392816027599974	0.766069471415381	0.985711767415596	HTR4	cg01330016	441	-0.626615451174385	0.784886626725287	0.998268125304863	H6PD
cg07464571	441	-0.112362149688087	0.772435758122946	0.98821050722751	HTR4	cg20060666	441	-0.525488366886553	0.774708581254778	0.994179481331605	TPH2	cg12440040	441	-0.0611262434243421	0.816112180500391	0.993106697966735	LEP	cg02187522	441	0.451784791667474	0.791729305734629	0.990877270468319	HTR6	cg20494779	441	-0.191584296560757	0.749597528906165	0.95703805624586	AVPR1A	cg06492144	441	0.167183747650486	0.767524299595975	0.985860182378077	PROP1	cg07724674	441	-1.26687520994131	0.790426649273514	0.998268125304863	NR3C1
cg04987827	441	1.01217905891172	0.779071773064373	0.98821050722751	NR3C2	cg10953410	441	0.0724140913136018	0.775351932451551	0.994179481331605	HTR5A	cg22186216	441	-0.153904351717194	0.817478770488508	0.993106697966735	CYP11A1	cg00022871	441	-0.197861142545201	0.792250766816452	0.990877270468319	HTR6	cg22584138	441	0.272413116652655	0.752584894134927	0.95703805624586	HSD11B2	cg13947929	441	-0.301285524438917	0.769807568507574	0.987070331744904	DDC	cg24934431	441	-0.29249651325714	0.791113018289623	0.998268125304863	ACE
cg13232821	441	-0.142057283737669	0.780278578594099	0.98821050722751	LEP	cg26966083	441	0.141399294442015	0.777034609306903	0.994604299912835	COMT	cg10913456	441	1.08644202943834	0.817687648663519	0.993106697966735	CRHR2	cg26332534	441	0.782078005098536	0.792896319578882	0.990877270468319	AVP	cg22546130	441	-0.423827550185342	0.754361908643146	0.95703805624586	HSD11B2	cg09797446	441	-0.195646696202292	0.774205434602252	0.988811708560772	HTR1E	cg09527270	441	-0.150495184502475	0.791640338927681	0.998268125304863	FKBP5
cg12908660	441	-0.103232509797172	0.78251553052117	0.98821050722751	HTR5A	cg21901156	441	-0.148026203607576	0.779375754646918	0.995266283348139	CYP11A1	cg14558428	441	-0.0442088660993974	0.817901609563416	0.993106697966735	CRH	cg01489398	441	-0.136466254435708	0.793909999698462	0.990877270468319	TBX19	cg13947929	441	-0.305655461307297	0.754570645597666	0.95703805624586	DDC	cg00967901	441	-1.16510354802218	0.779064688318223	0.988811708560772	TBX19	cg05885577	441	0.162910913700706	0.793143735429628	0.998268125304863	HTRA3
cg06787004	441	-0.380463947675779	0.784308590769622	0.98821050722751	DRD1	cg18845001	441	-0.0878296016434467	0.784362763323241	0.995266283348139	HTR3A	cg06777002	441	0.603378995967133	0.82042234005289	0.993106697966735	PROP1	cg27130954	441	0.245166966446315	0.795950771906747	0.990877270468319	COMT	cg01192538	441	-0.191845005888198	0.754810116997447	0.95703805624586	H6PD	cg27503360	441	-0.393038019865374	0.779921910670262	0.988811708560772	COMT	cg25924472	441	0.074216606550444	0.793962059424052	0.998268125304863	MC4R
cg17095936	441	-0.0654403398627744	0.784810340136806	0.98821050722751	HTR7	cg11469319	441	0.576335945927083	0.785034428685656	0.995266283348139	CRHR2	cg11247289	441	-0.175996144655954	0.820525513837645	0.993106697966735	DDC	cg07733851	441	0.211467976407659	0.79681421277228	0.990877270468319	NR3C1	cg27345592	441	0.484680646849368	0.75544904294434	0.95703805624586	COMT	cg00562879	441	1.09881321939039	0.780016316340615	0.988811708560772	H6PD	cg21256649	441	-0.616543004351452	0.794507384602856	0.998268125304863	HTR2A
cg24105933	441	0.338602187170843	0.787627089929447	0.98821050722751	SLC6A4	cg12367389	441	0.185091458753129	0.786303103150211	0.995266283348139	DDC	cg24134767	441	-0.128606999881957	0.82058922536387	0.993106697966735	CRHR1	cg20336341	441	0.170142824173126	0.798327210963561	0.990877270468319	TPH2	cg09576143	441	0.301287110596823	0.759166956249573	0.95703805624586	FKBP5	cg08560888	441	0.221116950094157	0.78002524120733	0.988811708560772	NR3C1	cg05951817	441	0.187532202087761	0.796292305685123	0.998268125304863	NR3C2
cg26132809	441	0.224985338033497	0.787633902744945	0.98821050722751	AVP	cg11916054	441	0.21056294929612	0.787431121644605	0.995266283348139	HTR5A	cg03321592	441	0.0587231194034202	0.821782967262643	0.993106697966735	POMC	cg23570923	441	-0.253789728664463	0.799388093309927	0.990877270468319	SLC6A4	cg03724721	441	-0.876424897744952	0.759301707756327	0.95703805624586	SRD5A2	cg03565659	441	-0.594247838739943	0.780616603875799	0.988811708560772	SRD5A2	cg02757179	441	0.137962481969942	0.799878457639901	0.998268125304863	POMC
cg13051970	441	-0.131260410361834	0.78818562310085	0.98821050722751	DDC	cg04042861	441	-0.164766649194404	0.790447958421459	0.995266283348139	POMC	cg18248586	441	0.132881129880263	0.822779423812713	0.993106697966735	TH	cg20140452	441	-0.413774608779294	0.801073326371617	0.990877270468319	TPH2	cg12367389	441	0.293351420627391	0.762208960004121	0.95703805624586	DDC	cg26464934	441	0.206119714135526	0.781408474579796	0.988811708560772	AVP	cg19815720	441	-0.140469991431631	0.800735636774619	0.998268125304863	TPH2
cg09714615	441	0.0534123768605452	0.788855068855369	0.98821050722751	HTR1E	cg16536918	441	-0.434215119743209	0.792197224597473	0.995266283348139	HTRA1	cg26558919	441	0.807662059386908	0.823217211554924	0.993106697966735	COMT	cg03667083	441	0.118662396161119	0.80347465393135	0.990877270468319	DHRS9	cg26720913	441	0.518525050726209	0.768077106853778	0.95703805624586	COMT	cg09863950	441	0.255025935480342	0.781913606497784	0.988811708560772	HTR1E	cg26132809	441	0.335126250867015	0.80074115768209	0.998268125304863	AVP
cg25551168	441	0.200805112161182	0.789026474363687	0.98821050722751	MC2R	cg18660363	441	0.0729723316091363	0.792349106730826	0.995266283348139	TH	cg13251292	441	-0.0778314123646201	0.823260517260935	0.993106697966735	DDC	cg26321066	441	-0.0823345470589248	0.806053400754027	0.990877270468319	AVP	cg21298978	441	0.3573203365447	0.768638077929274	0.95703805624586	HTR2A	cg19491599	441	-0.238544377138127	0.783516935404163	0.989139733203197	DRD2	cg08389266	441	-0.149529350334864	0.801238302079015	0.998268125304863	NR3C1
cg02665568	441	-0.245958707622553	0.789658829547422	0.98821050722751	DHRS9	cg10207656	441	0.273895214419123	0.793912082190664	0.995266283348139	FKBP5	cg04863452	441	0.187772422126895	0.824336808853108	0.993106697966735	NR3C2	cg10205430	441	0.152042539299533	0.806831463111367	0.990877270468319	FKBP5	cg15572496	441	0.29751011368997	0.775349630551856	0.95703805624586	CYP17A1	cg14734794	441	-0.148895469231272	0.785365085262662	0.989240584937197	CRH	cg26880525	441	0.2952478703353	0.802428661245214	0.998268125304863	COMT
cg24738325	441	-0.523105554174982	0.792698124621062	0.98821050722751	SLC6A4	cg20807790	441	-0.0829686084054629	0.794950589210438	0.995266283348139	HTR2A	cg18701449	441	-0.0878366685683073	0.82534781075821	0.993106697966735	DRD2	cg03857453	441	-0.719827509955961	0.80741628579816	0.990877270468319	POMC	cg07833420	441	0.26555912672708	0.776213862621746	0.95703805624586	DRD1	cg00674304	441	0.928750164928539	0.786397730623154	0.989240584937197	H6PD	cg14170547	441	0.180995880082548	0.803584642045775	0.998268125304863	LEP
cg17805199	441	-0.237154570502612	0.794347761487203	0.98821050722751	DRD2	cg00308665	441	-0.106172685746631	0.79616261237792	0.995266283348139	H6PD	cg03667083	441	-0.12069448641242	0.82576969752848	0.993106697966735	DHRS9	cg10906284	441	0.060856574468413	0.80785345078347	0.990877270468319	CRHR2	cg11750900	441	0.814387539023411	0.778992717074318	0.95703805624586	DDC	cg21240762	441	-1.83578933820651	0.78864882300266	0.989240584937197	HTR2A	cg11157691	441	-0.166404757506821	0.803993293453815	0.998268125304863	LEP
cg07724674	441	-0.779412538012949	0.796123239571822	0.98821050722751	NR3C1	cg05346287	441	-0.154460891342913	0.79785600790776	0.995266283348139	NR3C2	cg02965092	441	-0.0904530503331047	0.826023325689523	0.993106697966735	POMC	cg17772763	441	-0.181919608468868	0.809098541138773	0.990877270468319	HTR3A	cg04144768	441	0.404186517749087	0.779064786119336	0.95703805624586	HTR3C	cg20807790	441	-0.125889790806372	0.78980661795338	0.989240584937197	HTR2A	cg15140722	441	-0.0951106534000898	0.806767213192224	0.998268125304863	HTRA1
cg06751221	441	-0.335817456922822	0.797566520062671	0.98821050722751	HTR4	cg26464934	441	0.126098060159936	0.802403225532164	0.995266283348139	AVP	cg15868400	441	-0.340207107358922	0.827062010102848	0.993106697966735	HTRA1	cg27549720	441	0.10975304042032	0.811683057015939	0.990877270468319	COMT	cg26948603	441	-0.813157736454895	0.779723847606316	0.95703805624586	COMT	cg25736198	441	-0.521499849848543	0.791000760453863	0.989240584937197	MC2R	cg08636224	441	-0.698546802221896	0.807290715732942	0.998268125304863	SRD5A1
cg05939993	441	0.104630975474092	0.800189578183238	0.98821050722751	HTRA3	cg06623827	441	0.126832257999349	0.804023636256209	0.995266283348139	HTR4	cg07579946	441	0.19943682048896	0.827419000328772	0.993106697966735	NR3C1	cg10953410	441	-0.05009799433912	0.813370441229164	0.990877270468319	HTR5A	cg02577436	441	0.678909146618388	0.781825972773524	0.95703805624586	DHRS9	cg24525872	441	-2.20524322970162	0.791661283326099	0.989240584937197	CRHR1	cg27528351	441	0.207252687798515	0.812769549687059	0.998268125304863	COMT
cg21256649	441	0.376398439415494	0.800549158169691	0.98821050722751	HTR2A	cg17015994	441	0.164919306382537	0.804517185689746	0.995266283348139	HTRA1	cg08208133	441	0.113652752840089	0.827664479602512	0.993106697966735	NR3C1	cg22549881	441	-0.0397780004688174	0.813500554038905	0.990877270468319	HSD11B2	cg24433738	441	0.55436738956765	0.784935891226382	0.95703805624586	CRHR1	cg04856689	441	0.519930922358112	0.797745530656412	0.99008318749272	NR3C2	cg17524078	441	-0.0905809770228165	0.81334243583603	0.998268125304863	HTR3A
cg19730798	441	0.667126134262721	0.801255178953767	0.98821050722751	TPH2	cg06947205	441	0.603763171662464	0.809105269372038	0.995266283348139	NR3C1	cg23951474	441	-0.117467024197886	0.829523414316035	0.993106697966735	CRHR1	cg20967585	441	-0.0591115097841863	0.814226851323336	0.990877270468319	HTR2A	cg09147827	441	0.114501888717865	0.785938670649296	0.95703805624586	FKBP5	cg01586609	441	0.151975320870002	0.798315880077611	0.99008318749272	HTR6	cg12670061	441	1.20627142840835	0.814652416891723	0.998268125304863	CRHR2
cg10216820	441	0.139569857391701	0.803556955938032	0.98821050722751	FKBP5	cg00629244	441	0.968843641339196	0.809121515493429	0.995266283348139	HTR6	cg18660363	441	-0.0568320319520083	0.829561052325227	0.993106697966735	TH	cg01926269	441	-0.307873587865815	0.814856529212412	0.990877270468319	H6PD	cg05942508	441	0.362338948334363	0.788140204618472	0.95703805624586	NR3C2	cg25394652	441	-1.35054113111592	0.798667446294781	0.99008318749272	CRHR1	cg07579946	441	-0.251320753365889	0.821211733862199	0.998268125304863	NR3C1
cg20178075	441	0.0646046347752305	0.805024320568083	0.98821050722751	AVPR1A	cg20178075	441	0.0853797535849965	0.812048090605357	0.995266283348139	AVPR1A	cg08258978	441	-0.121556587930572	0.830020853690599	0.993106697966735	PROP1	cg08915438	441	0.200560138946632	0.815084650220721	0.990877270468319	HTR4	cg11423517	441	-0.184485264929254	0.788232196424219	0.95703805624586	DDC	cg14714364	441	0.138105847266404	0.799950521912302	0.99008318749272	CYP11B1	cg16897216	441	0.10775333570629	0.82174288687291	0.998268125304863	CYP17A1
cg24425171	441	-0.251939443921958	0.805721075899559	0.98821050722751	CRHR1	cg21330703	441	-0.482166816522314	0.81261659515407	0.995266283348139	SERPINA6	cg00335286	441	0.0990817278410406	0.831371205272185	0.993106697966735	H6PD	cg04632887	441	-0.285546239959511	0.816364413679296	0.990877270468319	HTRA3	cg10777103	441	-1.04639100992075	0.789678945563826	0.95703805624586	HTR5A	cg25780543	441	-0.26064404695636	0.801330032634051	0.99008318749272	MC4R	cg06033660	441	0.147656810421462	0.821863719798844	0.998268125304863	NR3C2
cg16897216	441	0.074673916034092	0.806303910991899	0.98821050722751	CYP17A1	cg07304526	441	0.301774163270919	0.812925862993737	0.995266283348139	PROP1	cg24118521	441	-0.156666148406413	0.831428016128717	0.993106697966735	CRHR1	cg13232821	441	-0.134310072403609	0.817449430273844	0.990877270468319	LEP	cg04484523	441	0.30073282958107	0.790096767945347	0.95703805624586	HTR3C	cg08400935	441	-0.314783582601867	0.801853717756496	0.99008318749272	NR3C1	cg02711929	441	0.154201562740944	0.829365445776298	0.998268125304863	SRD5A2
cg24525872	441	-0.988642993187642	0.807988507024979	0.98821050722751	CRHR1	cg26464411	441	0.522664067117162	0.813490236966183	0.995266283348139	AVP	cg18226539	441	0.122908018333089	0.831808184756368	0.993106697966735	HTR3A	cg18248586	441	0.120336586406389	0.817789151941265	0.990877270468319	TH	cg09623773	441	-0.158820375127944	0.79039748717348	0.95703805624586	FKBP5	cg01192538	441	0.159961120678352	0.804353950568809	0.99008318749272	H6PD	cg15835825	441	-0.268416750034082	0.829602682598284	0.998268125304863	HTRA1
cg02440279	441	-0.787499915917699	0.809456974916482	0.98821050722751	POMC	cg00078348	441	0.1060126294689	0.81472228362142	0.995266283348139	TBX19	cg23913482	441	0.59207324151068	0.83319176120859	0.993106697966735	CRHR1	cg22059812	441	0.515385849262303	0.818268775076402	0.990877270468319	CYP11A1	cg14714364	441	0.137640076864708	0.790668608040915	0.95703805624586	CYP11B1	cg20697172	441	0.162193726066585	0.805348670088135	0.99008318749272	TPH2	cg14714364	441	0.0904028765277941	0.830096941906483	0.998268125304863	CYP11B1
cg15003182	441	-0.147502728910154	0.812079616982549	0.98821050722751	HTRA1	cg07545640	441	-1.05539776118199	0.815808592490927	0.995266283348139	NR3C1	cg17772763	441	-0.180724867029021	0.834504493928985	0.993106697966735	HTR3A	cg27646908	441	-0.60643159349929	0.818394243446223	0.990877270468319	COMT	cg20336341	441	0.299610196605961	0.791996596686073	0.95703805624586	TPH2	cg07425204	441	0.293783332240643	0.806392986132018	0.99008318749272	HTR4	cg18232548	441	0.585646806121576	0.830577539899821	0.998268125304863	DRD2
cg14059288	441	0.248343049626553	0.812412214551339	0.98821050722751	HTR5A	cg06751221	441	0.40295154543912	0.818816686808933	0.995266283348139	HTR4	cg13232821	441	-0.137550813030654	0.835283960959829	0.993106697966735	LEP	cg14325092	441	-0.138136747656177	0.821521309305086	0.990877270468319	CYP11B1	cg00615746	441	0.148014026737002	0.792777980413995	0.95703805624586	HSD11B1	cg02508664	441	-0.218107594464006	0.806410782818569	0.99008318749272	HTR2B	cg10468385	441	0.164820600218674	0.832318972209401	0.998268125304863	HTR1E
cg23764129	441	0.148222646862017	0.814410843124698	0.98821050722751	PRKAR1A	cg01145353	441	0.280860673523583	0.820652957512239	0.995266283348139	TBX19	cg23524341	441	0.459362646955854	0.836270053194548	0.993106697966735	ACE	cg25920792	441	0.803368977457893	0.823089056390334	0.990877270468319	MC2R	cg03721064	441	1.45912890808691	0.792889953891797	0.95703805624586	DHRS9	cg26966083	441	0.178913858482161	0.807133033282109	0.99008318749272	COMT	cg00242031	441	-0.119840591905092	0.834380889783627	0.998268125304863	H6PD
cg09576143	441	0.117654460266668	0.81622650375925	0.98821050722751	FKBP5	cg02712145	441	0.174827555918671	0.821113821988313	0.995266283348139	SRD5A2	cg23612570	441	0.126980909678244	0.836688545500555	0.993106697966735	PRKAR1A	cg09553346	441	0.569761661602816	0.824806708320523	0.990877270468319	HTR1E	cg02079741	441	0.224083355045034	0.793152982184834	0.95703805624586	HSD11B1	cg12782180	441	-0.171681109214428	0.810906910850511	0.991162333915758	CRHR2	cg04042861	441	-0.1510174828594	0.836081598008236	0.998268125304863	POMC
cg04091563	441	-0.0406309442088773	0.818232392913215	0.98821050722751	POMC	cg11247289	441	-0.185868587910216	0.821311268462995	0.995266283348139	DDC	cg23791011	441	0.290107089647131	0.837878770209554	0.993106697966735	ACE	cg09920557	441	-0.715061842269245	0.826285162436098	0.990877270468319	HTR1E	cg06941869	441	0.187226651187133	0.795889890542711	0.95703805624586	SRD5A1	cg00293936	441	0.772749020155579	0.811225964941337	0.991162333915758	HTR6	cg10097150	441	0.0814047370779317	0.836962384342791	0.998268125304863	FKBP5
cg18757974	441	0.350217644046132	0.820148922718701	0.98821050722751	DRD2	cg06860277	441	0.182419216965247	0.821954377381526	0.995266283348139	NR3C1	cg00930194	441	0.0881666903072406	0.837999442381046	0.993106697966735	TBX19	cg25725890	441	-0.65476854934045	0.829279282247199	0.990877270468319	MC2R	cg19457823	441	-0.200424849240725	0.796928829471765	0.95703805624586	TH	cg23335356	441	0.138207333760785	0.812052836075003	0.991162333915758	ACE	cg20967585	441	-0.0703468730282155	0.838951315469246	0.998268125304863	HTR2A
cg11152298	441	-0.769129934502116	0.821716081647521	0.98821050722751	HTR5A	cg13232821	441	-0.157794263741518	0.822129359358264	0.995266283348139	LEP	cg17036562	441	-0.0538849550292231	0.844787450821359	0.993106697966735	HTR7	cg21960184	441	0.0598784332465836	0.830281168861948	0.990877270468319	CYP11A1	cg16642545	441	0.172793802104805	0.79934089795813	0.95703805624586	HTRA1	cg02928916	441	-0.224814125555332	0.818302800392917	0.996503433267802	POMC	cg09147827	441	0.0695911431918317	0.839368106828283	0.998268125304863	FKBP5
cg21013206	441	-0.0955458254822934	0.822389767915711	0.98821050722751	HTR2A	cg10847032	441	-0.0521740375858731	0.822368566551191	0.995266283348139	HTR5A	cg21773872	441	0.121694833104457	0.845213038406859	0.993106697966735	CYP11A1	cg14418802	441	-0.199077928462589	0.831819847108195	0.990877270468319	CYP11B1	cg23914842	441	-0.128122934392479	0.799705586616227	0.95703805624586	PRKAR1A	cg12083122	441	0.583014984815257	0.820012641849033	0.996503433267802	HTR5A	cg26466234	441	-0.39431002990966	0.841649946346236	0.998268125304863	AVP
cg07304526	441	0.209435917706173	0.823402133527767	0.98821050722751	PROP1	cg19107055	441	-0.134107895022644	0.825745430369215	0.995266283348139	HTR3B	cg13499155	441	0.0770028007115926	0.845867147751723	0.993106697966735	HTR5A	cg19594666	441	-0.0498838963424088	0.832596842986853	0.990877270468319	HTR3A	cg23601416	441	-0.299484613755613	0.799885019203479	0.95703805624586	CRHR1	cg18023598	441	0.463209378009491	0.820490598587347	0.996503433267802	TH	cg27051089	441	0.102538581205352	0.844129022818155	0.998268125304863	COMT
cg26332534	441	-0.573115381553169	0.828061688968848	0.98821050722751	AVP	cg22391185	441	0.537483616878284	0.827308563561689	0.995266283348139	CYP11A1	cg16897216	441	-0.0767531290230844	0.846795078042191	0.993106697966735	CYP17A1	cg14149680	441	0.0673925231617436	0.833988959135735	0.990877270468319	HTR5A	cg24680141	441	-1.26884846082652	0.800525460840823	0.95703805624586	ACE	cg24433738	441	-0.480144867982718	0.824273524790541	0.996634083081028	CRHR1	cg23881368	441	-0.128286779400664	0.846573638512922	0.998268125304863	CRHR1
cg18954700	441	-0.767762565901622	0.831399229738942	0.98821050722751	DRD2	cg09863950	441	0.136377497995613	0.827795967590088	0.995266283348139	HTR1E	cg12746356	441	0.94093035528236	0.848449171102584	0.993106697966735	HTR5A	cg01804500	441	-0.377856676509571	0.836137802474097	0.990877270468319	H6PD	cg22900229	441	1.02951318122507	0.800904674343573	0.95703805624586	HSD11B2	cg23791011	441	0.484537929211309	0.824326081301595	0.996634083081028	ACE	cg02716646	441	0.0894358725601134	0.848294947858356	0.998268125304863	DHRS9
cg02187522	441	0.319736343935197	0.831573325247411	0.98821050722751	HTR6	cg24661173	441	0.0928994796464876	0.830082816343075	0.995266283348139	ACE	cg04554613	441	-0.16585108515551	0.848610788786262	0.993106697966735	HTRA3	cg18146873	441	0.494833286955767	0.836596496164602	0.990877270468319	TH	cg24353392	441	0.365623860964085	0.801837255119249	0.95703805624586	PRKAR1A	cg07485685	441	1.297173343403	0.826921057576535	0.996634083081028	SRD5A1	cg24425171	441	-0.303466692694689	0.851094716080927	0.998268125304863	CRHR1
cg12966915	441	-0.507126513636336	0.836032848997367	0.98821050722751	LEP	cg19628225	441	0.102373616563496	0.830428918012384	0.995266283348139	TH	cg14174946	441	0.0549471329492873	0.848852620609499	0.993106697966735	DDC	cg11564670	441	-0.0573014996127361	0.838095686629297	0.990877270468319	LEP	cg20804163	441	0.666123999761471	0.803748830989274	0.95703805624586	HTR2A	cg03570920	441	-0.0731239177139565	0.82742775617946	0.996634083081028	SRD5A2	cg04091563	441	0.0517123277433649	0.852703378210255	0.998268125304863	POMC
cg21901156	441	-0.0791551656551398	0.837928315731883	0.98821050722751	CYP11A1	cg18190187	441	-0.501467177879447	0.831427343385765	0.995266283348139	HTR3A	cg18773129	441	-0.299065133781986	0.850679319296126	0.993106697966735	TH	cg24425171	441	-0.238787463525587	0.838369860356741	0.990877270468319	CRHR1	cg02937158	441	-0.220788367912524	0.803900151444222	0.95703805624586	POMC	cg06947205	441	-0.780259822829403	0.828292986181566	0.996634083081028	NR3C1	cg12440040	441	0.0591162370655475	0.853310311713993	0.998268125304863	LEP
cg10205430	441	0.110519076114077	0.839273127823846	0.98821050722751	FKBP5	cg07724674	441	-0.86021605089629	0.832983937642903	0.995266283348139	NR3C1	cg20592995	441	-0.296916518343941	0.850763719182408	0.993106697966735	AVPR1A	cg26344168	441	-0.0388743192725004	0.83884205411522	0.990877270468319	AVP	cg06937024	441	1.43398336351774	0.804194349144924	0.95703805624586	PROP1	cg03321592	441	-0.0890146454418786	0.828722906040203	0.996634083081028	POMC	cg25190094	441	-0.592249495624797	0.854179674500986	0.998268125304863	PRKAR1A
cg00025823	441	0.0674386308184684	0.839554508763531	0.98821050722751	H6PD	cg10913456	441	-1.04051340802819	0.834011825323698	0.995266283348139	CRHR2	cg21633143	441	0.515094122125311	0.851425965593857	0.993106697966735	SERPINA6	cg12580770	441	-0.0419617707574013	0.838959131855869	0.990877270468319	DDC	cg27521571	441	-0.15418567224271	0.804503090674081	0.95703805624586	COMT	cg21633143	441	-0.949714571604388	0.830106572273024	0.996669554964022	SERPINA6	cg26160839	441	0.0981851238704415	0.855676061344022	0.998268125304863	AVP
cg20336341	441	0.118119287300943	0.839928517573203	0.98821050722751	TPH2	cg04632887	441	0.3130741429517	0.835612374299038	0.995266283348139	HTRA3	cg16683741	441	-0.281229204421564	0.852805708593466	0.993106697966735	HTRA1	cg18442632	441	0.0941834393143978	0.839459648421033	0.990877270468319	TH	cg00610228	441	-1.32160552274369	0.805210393932271	0.95703805624586	H6PD	cg23753947	441	0.385395007745877	0.832515365088175	0.997874792373044	SLC6A4	cg18847882	441	0.304024834561223	0.856176926489485	0.998268125304863	DRD2
cg08894761	441	-0.0313746257335004	0.843262645624391	0.98821050722751	DRD1	cg23881368	441	0.120242603055361	0.836206616285578	0.995266283348139	CRHR1	cg26132809	441	0.197278102154099	0.855258995059902	0.993106697966735	AVP	cg08389266	441	0.0863633539040482	0.839563731223619	0.990877270468319	NR3C1	cg16003049	441	-0.203940658872049	0.805763591612005	0.95703805624586	HTRA1	cg18147569	441	1.10246103220793	0.835711262699132	0.997874792373044	DRD2	cg01926269	441	0.329322378838805	0.856492486493255	0.998268125304863	H6PD
cg02250787	441	0.0948142649976991	0.844154139349682	0.98821050722751	POMC	cg05723130	441	-0.640437795892598	0.838874096656418	0.995266283348139	HTRA3	cg10650018	441	0.0461843817766348	0.855856295625433	0.993106697966735	FKBP5	cg13094036	441	-0.104049061254136	0.839812225969169	0.990877270468319	LEP	cg13051970	441	0.233538874783108	0.807205236422589	0.95703805624586	DDC	cg25276126	441	-0.139774248622439	0.837605653434827	0.997874792373044	SLC6A4	cg18190187	441	-0.495118287736515	0.857524187267462	0.998268125304863	HTR3A
cg16830379	441	-0.088702785778864	0.844721593597639	0.98821050722751	HTRA1	cg12782180	441	0.0969245779519776	0.841729370597664	0.995266283348139	CRHR2	cg26969596	441	0.0669608329636601	0.856065008822931	0.993106697966735	COMT	cg03176729	441	-0.0775341757799776	0.843690119969881	0.990877270468319	SRD5A2	cg05961700	441	-0.173001004549309	0.808340533643587	0.95703805624586	HTRA3	cg19233761	441	-0.162323923231948	0.839486980220409	0.997874792373044	HTR3B	cg03279206	441	-0.108572300958463	0.85752525058309	0.998268125304863	SRD5A2
cg02079741	441	-0.0854943810428023	0.845145563877991	0.98821050722751	HSD11B1	cg17772763	441	-0.179395551464864	0.841986313654512	0.995266283348139	HTR3A	cg15140722	441	0.0579869250401691	0.856232945183943	0.993106697966735	HTRA1	cg05016953	441	0.793862029729463	0.845244498748706	0.990877270468319	NR3C2	cg03691958	441	-1.05321825445368	0.809915712147657	0.95703805624586	POMC	cg11423517	441	0.143346143146759	0.84165704826113	0.997874792373044	DDC	cg21881537	441	0.235374667753818	0.859052420708609	0.998268125304863	CYP11A1
cg08929103	441	0.0768647381555524	0.846501861079977	0.98821050722751	NR3C1	cg10205430	441	0.148365803208857	0.84356035987505	0.995266283348139	FKBP5	cg07724674	441	0.707011795996282	0.857384125367146	0.993106697966735	NR3C1	cg03321592	441	0.0446188614404284	0.845538412522067	0.990877270468319	POMC	cg00903099	441	0.129313360633408	0.810669317564015	0.95703805624586	H6PD	cg14284211	441	0.338153763206447	0.842915165150298	0.997874792373044	CRH	cg05939993	441	-0.114870237665304	0.859804907562215	0.998268125304863	HTRA3
cg27569822	441	0.565382186247066	0.848673549903385	0.98821050722751	COMT	cg11564670	441	0.0662360597947085	0.844273225607038	0.995266283348139	LEP	cg13996731	441	-0.543360943151756	0.86210220571539	0.993106697966735	CRHR2	cg06787004	441	-0.305755748021686	0.846277256609821	0.990877270468319	DRD1	cg18232548	441	0.803712544257703	0.810877744413361	0.95703805624586	DRD2	cg18226539	441	-0.180290170718761	0.842927942502379	0.997874792373044	HTR3A	cg11765362	441	0.0507089234688679	0.861196608577146	0.998268125304863	AKR1D1
cg16536918	441	0.229851150671887	0.849017829985601	0.98821050722751	HTRA1	cg19233761	441	-0.102990957386397	0.845960811568481	0.995266283348139	HTR3B	cg13527387	441	-0.064718795728617	0.862577906176815	0.993106697966735	CRHR2	cg26532621	441	0.102651821649654	0.847212506746401	0.990877270468319	AVP	cg05951817	441	0.213148157473909	0.811686720432404	0.95703805624586	NR3C2	cg10468385	441	0.197300301904503	0.843721193739689	0.997874792373044	HTR1E	cg20336341	441	0.15797302687816	0.863665304474285	0.998268125304863	TPH2
cg08479865	441	0.0420132420478534	0.849434175691103	0.98821050722751	PROP1	cg08273233	441	-0.180243053073819	0.846497732971734	0.995266283348139	SRD5A1	cg25121146	441	0.0411038630678564	0.862763396191105	0.993106697966735	PRKAR1A	cg16897216	441	0.0647942443416247	0.851924540301454	0.990877270468319	CYP17A1	cg21901156	441	-0.177943916996331	0.812470637691699	0.95703805624586	CYP11A1	cg15505103	441	-0.12441395056021	0.843813127606081	0.997874792373044	HTRA1	cg07806248	441	0.066760428446441	0.864993159273295	0.998268125304863	NR3C1
cg15888097	441	0.0442454782108403	0.850343378595385	0.98821050722751	HTR7	cg09553346	441	0.59516213508901	0.846819332907413	0.995266283348139	HTR1E	cg02250787	441	0.108150645623679	0.863581798125542	0.993106697966735	POMC	cg13527387	441	-0.058620183962044	0.858114222537214	0.990877270468319	CRHR2	cg08372315	441	0.223265888582503	0.813001336920603	0.95703805624586	NR3C1	cg21013206	441	-0.169444203084755	0.844668472348378	0.997874792373044	HTR2A	cg20991421	441	-0.10545761440037	0.866384869191254	0.998268125304863	HTR2A
cg16188532	441	0.133840038993475	0.851529007145034	0.98821050722751	HTRA1	cg14896516	441	0.113307812032051	0.846876538324031	0.995266283348139	HTRA1	cg04923928	441	-0.0775519236307221	0.863616799309764	0.993106697966735	HTRA3	cg12816057	441	0.0651983471540911	0.859252254488978	0.990877270468319	DDC	cg07724674	441	1.3813817444395	0.813899072607709	0.95703805624586	NR3C1	cg00307530	441	0.227154468749922	0.850209920016933	0.998275311105479	HSD3B2	cg13051970	441	0.12645755935876	0.870093556589629	0.998268125304863	DDC
cg25022311	441	0.059412925136769	0.855446533922916	0.98821050722751	CRHR1	cg02534661	441	0.419600271585423	0.850582229080762	0.995266283348139	DHRS9	cg21141047	441	0.441468638201473	0.865306886655962	0.993106697966735	HTR2A	cg24353392	441	-0.150286091892739	0.859472702209578	0.990877270468319	PRKAR1A	cg07485685	441	1.3297033039238	0.814456270547139	0.95703805624586	SRD5A1	cg15403517	441	0.0472944018105124	0.855452731633009	0.998275311105479	HTRA1	cg06787004	441	-0.35584278375593	0.871711420031641	0.998268125304863	DRD1
cg27549720	441	0.0717700070931036	0.858267288954978	0.98821050722751	COMT	cg15888097	441	0.0592702184913095	0.853203750381529	0.995266283348139	HTR7	cg15926585	441	0.0848490849189048	0.865767449924879	0.993106697966735	CYP17A1	cg09516959	441	-0.0632438342786591	0.860329778037034	0.990877270468319	HTR1E	cg25730237	441	0.323938086044537	0.816367034906113	0.95703805624586	MC4R	cg04471890	441	-0.568372675220949	0.856403110976001	0.998275311105479	DRD3	cg02261408	441	-0.113055181276356	0.871785110336376	0.998268125304863	SRD5A2
cg18701449	441	-0.0541113029666552	0.858867225098477	0.98821050722751	DRD2	cg02131967	441	-0.804001374082516	0.853984216407187	0.995266283348139	HTR6	cg23914842	441	0.0563951489607831	0.867164070547571	0.993106697966735	PRKAR1A	cg27051089	441	-0.0648727246970257	0.862191751455815	0.990877270468319	COMT	cg19815720	441	0.157669834120016	0.817809197100506	0.95703805624586	TPH2	cg15607306	441	0.134225087893694	0.859156727042472	0.998275311105479	HTRA1	cg10276623	441	-0.0595527102213721	0.872264048352629	0.998268125304863	HTR1E
cg23524341	441	-0.31649203520109	0.858897085126473	0.98821050722751	ACE	cg01972879	441	0.0683661692197088	0.854019166529932	0.995266283348139	HTR6	cg24547396	441	0.189234150463206	0.868407320775054	0.993106697966735	SLC6A4	cg12908660	441	0.0725682606845889	0.864175807096105	0.990877270468319	HTR5A	cg04632887	441	-0.47733110212434	0.81789619169517	0.95703805624586	HTRA3	cg06787004	441	-0.500535559582368	0.860726873231905	0.998275311105479	DRD1	cg09916783	441	-0.142943833747301	0.873423480631412	0.998268125304863	FKBP5
cg23851685	441	-0.0633954406757549	0.858922106832643	0.98821050722751	PRKAR1A	cg26724798	441	-0.0610886456873985	0.856992164851625	0.995266283348139	COMT	cg02508664	441	-0.0916880386237044	0.868816457591396	0.993106697966735	HTR2B	cg04856117	441	0.146273389494405	0.865919375586199	0.990877270468319	NR3C2	cg21094739	441	-0.246589390136454	0.81876986648875	0.95703805624586	HTR2A	cg19014730	441	-0.167241252032915	0.861319273439543	0.998275311105479	DRD2	cg09797446	441	0.0830299318619681	0.874414449093838	0.998268125304863	HTR1E
cg25730237	441	0.124810581456724	0.859345176887183	0.98821050722751	MC4R	cg25782665	441	-0.111773837006078	0.85723183811902	0.995266283348139	MC4R	cg09199250	441	0.0979024725506368	0.869170685984482	0.993106697966735	FKBP5	cg22601917	441	0.125572460261543	0.866367200695245	0.990877270468319	HSD11B2	cg14418802	441	-0.35985884000962	0.822304029899385	0.95703805624586	CYP11B1	cg23612570	441	0.167026618843746	0.862467743550164	0.998275311105479	PRKAR1A	cg25669230	441	-0.126325550140177	0.875738954929861	0.998268125304863	MC4R
cg25190094	441	0.363590722466675	0.859406395123947	0.98821050722751	PRKAR1A	cg09277575	441	0.0659617431717192	0.858799975177123	0.995266283348139	HTR1E	cg13175282	441	0.201740632127162	0.869874096664915	0.993106697966735	DDC	cg08929103	441	0.0755131426774508	0.868290203815172	0.990877270468319	NR3C1	cg27410679	441	-0.244906624193311	0.823101907799431	0.95703805624586	COMT	cg08852963	441	-0.219422674204829	0.864520874642101	0.998275311105479	NR3C1	cg18640030	441	0.0524410745212108	0.876972742657129	0.998268125304863	HTR3B
cg23791011	441	0.190858276441478	0.859425399978027	0.98821050722751	ACE	cg09714615	441	-0.0486927250865209	0.858844101061725	0.995266283348139	HTR1E	cg08389266	441	-0.0801924286600638	0.870333467627654	0.993106697966735	NR3C1	cg16830379	441	0.0846408806879873	0.869723832644976	0.990877270468319	HTRA1	cg14734794	441	0.116950817927976	0.824039309873307	0.95703805624586	CRH	cg20804163	441	-0.453477081830143	0.865610120947852	0.998275311105479	HTR2A	cg07528216	441	0.0993220463826074	0.877062739854189	0.998268125304863	NR3C1
cg08791953	441	-0.0493699478974588	0.859666571101583	0.98821050722751	NR3C1	cg11338426	441	0.328437734109948	0.862446001031027	0.995266283348139	DDC	cg27503360	441	0.143278586828024	0.871964389075564	0.993106697966735	COMT	cg21905167	441	0.161431150780442	0.870204237190411	0.990877270468319	CYP11A1	cg12908660	441	0.160564452694352	0.825016674676128	0.95703805624586	HTR5A	cg18849621	441	0.305985295774407	0.866135529428937	0.998275311105479	TPH1	cg06346307	441	-0.168332247983605	0.8772376188283	0.998268125304863	HTR4
cg03570920	441	0.0282237479978338	0.863458746014356	0.98821050722751	SRD5A2	cg08948964	441	-0.0817688444784932	0.863520154619589	0.995266283348139	FKBP5	cg05961700	441	-0.07698431198116	0.872948940703146	0.993106697966735	HTRA3	cg05346287	441	-0.0800611835931803	0.872978224969783	0.990877270468319	NR3C2	cg10930664	441	0.332393688411832	0.82706689449458	0.95703805624586	CRHR2	cg00363114	441	-0.133012897899629	0.867254474811306	0.998275311105479	HSD11B1	cg04632887	441	-0.260929010633077	0.877358043086462	0.998268125304863	HTRA3
cg14418802	441	-0.141083873523597	0.86391410092672	0.98821050722751	CYP11B1	cg26948603	441	-0.339228879595596	0.865617456248409	0.995266283348139	COMT	cg08700190	441	0.0813277444731644	0.872953287084818	0.993106697966735	PROP1	cg02711929	441	-0.0823937978279807	0.87402686705546	0.990877270468319	SRD5A2	cg16844661	441	0.207876998641177	0.829107919562029	0.95703805624586	HTRA1	cg11990309	441	0.0709405059194722	0.86883472640404	0.998275311105479	CYP3A4	cg01962937	441	0.508520757979691	0.880648953995609	0.998268125304863	H6PD
cg18190187	441	0.285535410853802	0.865455695543192	0.98821050722751	HTR3A	cg01804500	441	0.369378909956891	0.868418807555337	0.995266283348139	H6PD	cg01718447	441	0.10564014881293	0.873260781797047	0.993106697966735	H6PD	cg26464411	441	-0.288379562705539	0.87715892697716	0.990877270468319	AVP	cg02276314	441	0.270104135998263	0.830152011418924	0.95703805624586	DHRS9	cg19802564	441	0.117806611543844	0.871626273114836	0.998275311105479	TPH2	cg06841846	441	0.153985202380196	0.882349114792573	0.998268125304863	HTR4
cg19014730	441	-0.079142483765767	0.865506227090023	0.98821050722751	DRD2	cg02937158	441	-0.102482477856316	0.869991506500732	0.995266283348139	POMC	cg01962937	441	0.441546201213965	0.873435428541192	0.993106697966735	H6PD	cg04923928	441	-0.060612592140095	0.877460053311148	0.990877270468319	HTRA3	cg18584905	441	-1.02157172943419	0.83098685447442	0.95703805624586	TH	cg01962937	441	0.694820704345407	0.874460318862399	0.998275311105479	H6PD	cg17772763	441	0.153269970623669	0.883537927186276	0.998268125304863	HTR3A
cg10644575	441	0.0444847117974559	0.866095455818444	0.98821050722751	HTR1E	cg19802564	441	-0.0796687315322335	0.870847387778005	0.995266283348139	TPH2	cg16545496	441	-0.156703088672865	0.873712414583472	0.993106697966735	HTRA1	cg24680141	441	0.44668317242893	0.8778611291636	0.990877270468319	ACE	cg09122657	441	-1.37215480552162	0.831773134841022	0.95703805624586	HTR1E	cg14127947	441	-0.127546746875716	0.874867830557134	0.998275311105479	AKR1D1	cg26033657	441	-0.210651435868016	0.883717398683818	0.998268125304863	AVP
cg08241694	441	-0.0828998509820172	0.867991971118863	0.98821050722751	DRD1	cg07863439	441	-0.312651579793785	0.870967605625779	0.995266283348139	NR3C1	cg12728623	441	-0.257608187155561	0.875905009816616	0.993106697966735	LEP	cg15868400	441	0.212032032004603	0.878131197626864	0.990877270468319	HTRA1	cg06623827	441	0.152053514434836	0.833786307202886	0.95703805624586	HTR4	cg24353392	441	-0.23995309270938	0.875416644821933	0.998275311105479	PRKAR1A	cg22900229	441	-0.475168579038248	0.886707243814579	0.998268125304863	HSD11B2
cg00022871	441	-0.109836973550864	0.868093988182478	0.98821050722751	HTR6	cg27068143	441	0.0836923715054972	0.871942467850297	0.995266283348139	COMT	cg11712482	441	0.128775151335181	0.876067372222369	0.993106697966735	HTR5A	cg19815720	441	0.0609938951906992	0.878394582503323	0.990877270468319	TPH2	cg18226539	441	0.181156750844993	0.834287650393461	0.95703805624586	HTR3A	cg01443318	441	0.162052628997897	0.875978058098041	0.998275311105479	H6PD	cg27646908	441	0.51758472905928	0.88795609576615	0.998268125304863	COMT
cg23914842	441	-0.043089296564514	0.868760740600688	0.98821050722751	PRKAR1A	cg14149680	441	-0.0613250595265987	0.873566592851178	0.995266283348139	HTR5A	cg10538202	441	-0.0664295161309133	0.876071082726183	0.993106697966735	HTR1E	cg14692377	441	-0.310415288530725	0.878867917328936	0.990877270468319	CRH	cg26558919	441	1.14480560195998	0.835080231403859	0.95703805624586	COMT	cg22601917	441	-0.207714951945972	0.876603260102101	0.998275311105479	HSD11B2	cg05756489	441	-0.0623257767113722	0.889208245356121	0.998268125304863	HTRA3
cg01459748	441	0.0863208041788436	0.869047333210422	0.98821050722751	HTR6	cg07102705	441	-0.0517647269432937	0.873913140655432	0.995266283348139	HTR4	cg11765362	441	-0.0376839511692521	0.876138356670375	0.993106697966735	AKR1D1	cg24738325	441	0.348840927576444	0.879510318041497	0.990877270468319	SLC6A4	cg25011257	441	-0.237319678734914	0.83743400681732	0.95703805624586	SLC6A4	cg21286526	441	-0.400609427903174	0.877188712844458	0.998275311105479	HTR2A	cg13521908	441	0.369602357151665	0.889525689829924	0.998268125304863	DDC
cg02716646	441	0.0487402107600334	0.869360371771418	0.98821050722751	DHRS9	cg19826045	441	-0.253893772807224	0.876807950234737	0.995266283348139	AVPR1A	cg03721064	441	0.571241607191057	0.877922093954092	0.993106697966735	DHRS9	cg03724721	441	-0.250150778763967	0.881339141713914	0.990877270468319	SRD5A2	cg15888097	441	-0.0917237374901204	0.840338244667517	0.95703805624586	HTR7	cg27410679	441	-0.174234784860994	0.878759580118803	0.998275311105479	COMT	cg07075299	441	0.311334522271931	0.889794540663599	0.998268125304863	NR3C1
cg17772763	441	-0.107741299565401	0.870863448460634	0.98821050722751	HTR3A	cg24026230	441	0.0321830599543603	0.879406310836464	0.995266283348139	PRKAR1A	cg05952120	441	-0.327376894398463	0.878339935390307	0.993106697966735	HTRA3	cg11916054	441	-0.0972397130130359	0.88225764767888	0.990877270468319	HTR5A	cg15919431	441	-0.698008190008358	0.840496473253561	0.95703805624586	HTRA1	cg15572496	441	-0.159038276570155	0.88355303276114	0.998275311105479	CYP17A1	cg20697172	441	0.0696465713811766	0.891355837940652	0.998268125304863	TPH2
cg05624376	441	0.0810193392754016	0.874903781826413	0.98821050722751	NR3C2	cg12715421	441	-0.087555948536592	0.882993096943255	0.995266283348139	DDC	cg22584138	441	0.0890386671601196	0.878839336590557	0.993106697966735	HSD11B2	cg05426956	441	-0.112619974443573	0.884911878886535	0.990877270468319	NR3C2	cg01330016	441	0.569809450115489	0.842510844272217	0.95703805624586	H6PD	cg26932364	441	-0.181330854335681	0.884669729507681	0.998275311105479	COMT	cg18200810	441	0.0898663057688354	0.893466004131815	0.998268125304863	HTR3B
cg00862770	441	-0.471740846256914	0.875393289503793	0.98821050722751	HSD11B1	cg01489398	441	-0.0921562505483469	0.8830244169525	0.995266283348139	TBX19	cg18283321	441	0.123904355885599	0.881293759159213	0.993106697966735	HTR3A	cg19233761	441	0.0630868725141031	0.887164610198723	0.990877270468319	HTR3B	cg11765362	441	-0.0706037624624529	0.84398644231731	0.95703805624586	AKR1D1	cg10650018	441	0.0578262922667901	0.885026301545169	0.998275311105479	FKBP5	cg24353392	441	0.151840116561454	0.897627439556119	0.998268125304863	PRKAR1A
cg25780543	441	-0.0778510959858364	0.877482543766465	0.98821050722751	MC4R	cg11438011	441	0.0358708791971289	0.883274168345338	0.995266283348139	CRHR2	cg20991421	441	-0.075923411830836	0.882882865528667	0.993106697966735	HTR2A	cg17736230	441	0.211148417978486	0.888951729323437	0.990877270468319	TH	cg03472798	441	0.42517006158977	0.844331474854649	0.95703805624586	POMC	cg20941184	441	0.128261468550396	0.885029550161233	0.998275311105479	HTR2A	cg02299946	441	-0.361314108967873	0.898588612079257	0.998268125304863	POMC
cg12761518	441	-0.0832571476802391	0.880468682730205	0.98821050722751	DDC	cg04987827	441	0.714599871418312	0.884271833830975	0.995266283348139	NR3C2	cg15645634	441	-0.549795853807198	0.883621613421888	0.993106697966735	HTR7	cg13365022	441	0.0681828089775814	0.890270658326046	0.990877270468319	AKR1D1	cg09914773	441	0.202898343689522	0.84478939270083	0.95703805624586	FKBP5	cg21191514	441	0.0681222394739777	0.885265057251257	0.998275311105479	HTR2A	cg09914773	441	-0.106405972358717	0.898591590617793	0.998268125304863	FKBP5
cg10650018	441	0.0291199009136057	0.881335340789019	0.98821050722751	FKBP5	cg04484523	441	-0.111178325458435	0.884775241295642	0.995266283348139	HTR3C	cg26274946	441	-0.295627749971899	0.885647103184094	0.993106697966735	AVP	cg10847032	441	-0.0261058547542242	0.892238594606343	0.990877270468319	HTR5A	cg19233761	441	0.146730505409506	0.847134964169586	0.95703805624586	HTR3B	cg05951817	441	0.134359504421009	0.886555179051199	0.998275311105479	NR3C2	cg04199779	441	-0.57906400591962	0.900154754764156	0.998268125304863	DRD3
cg00610228	441	0.403617603203211	0.881454715657892	0.98821050722751	H6PD	cg10288772	441	0.347969285130305	0.885315571855718	0.995266283348139	FKBP5	cg27569822	441	0.552666789846423	0.886597679962386	0.993106697966735	COMT	cg00107488	441	-0.0872073227442373	0.893697955226849	0.990877270468319	H6PD	cg23764129	441	-0.23730882833066	0.847752202702526	0.95703805624586	PRKAR1A	cg24118521	441	0.163912909988532	0.887879978091983	0.998275311105479	CRHR1	cg02665568	441	0.182707570828707	0.900380620880164	0.998268125304863	DHRS9
cg09672383	441	-0.0355533305814683	0.883188287975782	0.98821050722751	FKBP5	cg03321592	441	0.0395805895690195	0.885934466139729	0.995266283348139	POMC	cg21094739	441	0.10241967502771	0.886910731142051	0.993106697966735	HTR2A	cg02716646	441	0.044747418592428	0.894690386963428	0.990877270468319	DHRS9	cg25669230	441	-0.187469404766292	0.850713355842484	0.95703805624586	MC4R	cg00698685	441	0.281137959361719	0.888020899916043	0.998275311105479	HTR6	cg20804163	441	0.267156604014101	0.900989105079897	0.998268125304863	HTR2A
cg19594666	441	0.029980983230705	0.885289906579674	0.98821050722751	HTR3A	cg02037013	441	0.0441111858354851	0.887343927052305	0.995266283348139	H6PD	cg19354750	441	0.317342956865264	0.887538957428468	0.993106697966735	HTR3A	cg27569822	441	-0.430263126511721	0.898765570859162	0.990877270468319	COMT	cg07528216	441	0.149767807310578	0.850731839978804	0.95703805624586	NR3C1	cg09863441	441	-0.287179505901211	0.888048340342858	0.998275311105479	FKBP5	cg26638505	441	-0.042104851582816	0.901522690318448	0.998268125304863	COMT
cg07425204	441	0.0834147642854853	0.886693610659408	0.98821050722751	HTR4	cg00365524	441	-0.0822597521993093	0.889789382440988	0.995266283348139	HTR6	cg09490603	441	-0.268523133561482	0.889789898367645	0.993106697966735	FKBP5	cg10323433	441	-0.0447487617747745	0.899396350570183	0.990877270468319	FKBP5	cg10538202	441	-0.119289181930345	0.850763304804436	0.95703805624586	HTR1E	cg04493143	441	0.126865120939839	0.889440085736879	0.998275311105479	HTR3C	cg25446361	441	-0.0764000583257642	0.903052162894761	0.998268125304863	CRHR1
cg19285508	441	-0.182927850142287	0.888797178095066	0.98821050722751	DRD2	cg00862770	441	0.559777021026185	0.890465219548327	0.995266283348139	HSD11B1	cg27521571	441	-0.0574337957386761	0.890318848284121	0.993106697966735	COMT	cg18200810	441	0.0601965702390497	0.902393017931285	0.990877270468319	HTR3B	cg02322203	441	0.305869134456776	0.851676987462172	0.95703805624586	POMC	cg23809645	441	-0.107536302991662	0.890682935017818	0.998275311105479	SLC6A4	cg11423517	441	-0.0674584489586704	0.903491233083371	0.998268125304863	DDC
cg09490603	441	0.203149264868879	0.891006572958257	0.98821050722751	FKBP5	cg26332534	441	0.489398459082868	0.89077632482352	0.995266283348139	AVP	cg21298978	441	0.110758839740793	0.890635858167748	0.993106697966735	HTR2A	cg10216820	441	0.077878146967073	0.903050766156582	0.990877270468319	FKBP5	cg26969596	441	0.101870237242365	0.851977330289665	0.95703805624586	COMT	cg02261408	441	-0.118742143061051	0.893877937728386	0.998275311105479	SRD5A2	cg08929103	441	0.0746443627138786	0.904405575737659	0.998268125304863	NR3C1
cg01819552	441	-0.0426161412796103	0.892426523210069	0.98821050722751	H6PD	cg13527387	441	-0.0532904430938966	0.89252957726522	0.995266283348139	CRHR2	cg22614355	441	-0.201539365639797	0.89097071453562	0.993106697966735	HSD11B2	cg05952120	441	0.224474756714792	0.903475074162682	0.990877270468319	HTRA3	cg23791011	441	-0.384979347877696	0.856562977325756	0.95703805624586	ACE	cg04607131	441	0.109830474821739	0.895532885449899	0.998275311105479	NR3C2	cg14418802	441	0.154170759022359	0.90522133053336	0.998268125304863	CYP11B1
cg16545496	441	0.101462558885562	0.892775121031412	0.98821050722751	HTRA1	cg14791547	441	-0.383512592648619	0.892584313455303	0.995266283348139	CYP11B1	cg06291867	441	0.102786397604585	0.891863812725641	0.993106697966735	DRD1	cg06669759	441	0.091256253705441	0.904778404358605	0.990877270468319	NR3C1	cg26321066	441	-0.102682763748479	0.857375987235721	0.95703805624586	AVP	cg21919834	441	0.188641265556808	0.897105280745934	0.998275311105479	CYP11A1	cg06937024	441	0.555535938145754	0.905300889685094	0.998268125304863	PROP1
cg11111332	441	-0.0636305175628157	0.895393521832843	0.98821050722751	CRHR2	cg24525872	441	0.717120436807191	0.896140228865558	0.995266283348139	CRHR1	cg21224972	441	-0.0479656090802755	0.897600676698738	0.993106697966735	HTR2A	cg20941184	441	-0.0578475050306757	0.906379099677183	0.990877270468319	HTR2A	cg00310588	441	-0.134035589580725	0.858687329375848	0.95703805624586	HSD11B1	cg04732193	441	-0.124867507871845	0.898943097007458	0.998275311105479	HTRA3	cg08400935	441	0.115295033491818	0.906267321136196	0.998268125304863	NR3C1
cg25121146	441	-0.0234093969994109	0.898238175084392	0.98821050722751	PRKAR1A	cg26135506	441	-0.476507452178977	0.89805393388064	0.995266283348139	AVP	cg09553346	441	0.37072245917784	0.900022966995551	0.993106697966735	HTR1E	cg09199250	441	0.060336162285971	0.906891985156165	0.990877270468319	FKBP5	cg10468385	441	0.1719094844529	0.858711657948571	0.95703805624586	HTR1E	cg05016953	441	-0.910949029388537	0.901671953834022	0.998275311105479	NR3C2	cg25836326	441	-0.112710293744974	0.911083821877392	0.998268125304863	MC2R
cg04856117	441	-0.0956211802852571	0.899929642083464	0.98821050722751	NR3C2	cg18248586	441	0.0807537344697931	0.898096545040261	0.995266283348139	TH	cg26656751	441	-0.0854430349470473	0.904631091560873	0.993106697966735	COMT	cg23809645	441	-0.0515391869476057	0.90696047094308	0.990877270468319	SLC6A4	cg23532924	441	0.120653930472762	0.858924194902751	0.95703805624586	ACE	cg18232548	441	0.435899665043281	0.901903350890662	0.998275311105479	DRD2	cg20518096	441	-0.0578454791617486	0.911512093845514	0.998268125304863	AVPR1A
cg14754494	441	0.0622596197382319	0.90089262038201	0.98821050722751	CYP11B1	cg01335087	441	0.119583738571051	0.90130018076598	0.995266283348139	H6PD	cg25669230	441	-0.0799830343760182	0.905868390944848	0.993106697966735	MC4R	cg16545496	441	0.0999725835772892	0.907053565082491	0.990877270468319	HTRA1	cg18450270	441	0.158762988798584	0.859513797796893	0.95703805624586	DRD2	cg14349956	441	-0.357843540624325	0.904720536151648	0.998275311105479	CRH	cg20060666	441	-0.234945325695942	0.912039373658691	0.998268125304863	TPH2
cg13521908	441	0.201243621675871	0.904826605295255	0.98821050722751	DDC	cg00310588	441	-0.064603735472932	0.902653789689796	0.995266283348139	HSD11B1	cg18534039	441	-0.0430694585827065	0.906275173104486	0.993106697966735	TH	cg23365637	441	-0.202275740728679	0.907116316947246	0.990877270468319	ACE	cg03056854	441	0.141459866830987	0.861533951261747	0.957838350647501	HTR2B	cg00022871	441	0.158359808572553	0.906262566306514	0.998275311105479	HTR6	cg01459748	441	-0.0874388318180825	0.915503923198235	0.998268125304863	HTR6
cg24718866	441	-0.103856027403779	0.906308654900047	0.98821050722751	PRKAR1A	cg10216820	441	-0.0918864320102659	0.904744568921335	0.995266283348139	FKBP5	cg10323433	441	0.0467773258666177	0.907779764474629	0.993106697966735	FKBP5	cg11338426	441	-0.182131886538642	0.90775563176648	0.990877270468319	DDC	cg25022311	441	0.103112214281403	0.87046971773592	0.964103455367214	CRHR1	cg00903099	441	0.0651662699053411	0.908047617204111	0.998275311105479	H6PD	cg19233761	441	-0.0653983693509542	0.915899193726502	0.998268125304863	HTR3B
cg14127947	441	-0.0467712581803634	0.906536763610508	0.98821050722751	AKR1D1	cg12728623	441	0.207178214512508	0.905134354661448	0.995266283348139	LEP	cg09714615	441	0.0295999008105328	0.909087424101914	0.993106697966735	HTR1E	cg11469319	441	0.195247461584098	0.911048504213743	0.990877270468319	CRHR2	cg18190187	441	0.531409494369644	0.872508097043937	0.964103455367214	HTR3A	cg08030082	441	-0.114837886066141	0.908670470250649	0.998275311105479	PROP1	cg17426905	441	-0.0751088554262987	0.917452437526824	0.998268125304863	TH
cg09361691	441	0.0722871784605727	0.906845900994256	0.98821050722751	HTR1E	cg25920792	441	-0.513518683539694	0.906059537765604	0.995266283348139	MC2R	cg14349956	441	0.221231620612223	0.909949245028716	0.993106697966735	CRH	cg11111332	441	0.0605156535427641	0.912163723392327	0.990877270468319	CRHR2	cg12807275	441	0.118977589016808	0.873632440437078	0.964103455367214	DDC	cg13175282	441	0.215739359281354	0.910738941490581	0.998275311105479	DDC	cg13232821	441	0.0824885336229588	0.917606311135494	0.998268125304863	LEP
cg14349956	441	-0.172431645882276	0.907664761347811	0.98821050722751	CRH	cg03691958	441	-0.35325610572588	0.906693091017584	0.995266283348139	POMC	cg02040921	441	0.254358920187614	0.910631614559317	0.993106697966735	TBX19	cg11491381	441	-0.176533598093847	0.912253020966852	0.990877270468319	AKR1D1	cg23042775	441	0.129829971290154	0.87371609825476	0.964103455367214	HSD11B2	cg04422019	441	-0.151825746854267	0.913101600223218	0.998275311105479	DRD3	cg02187522	441	0.244692371873154	0.917905267395557	0.998268125304863	HTR6
cg03691958	441	0.257058790204279	0.907713026846965	0.98821050722751	POMC	cg14325092	441	-0.0857658516887563	0.906795781912574	0.995266283348139	CYP11B1	cg23169111	441	0.0951083649482091	0.910894588760777	0.993106697966735	CRHR1	cg11845071	441	0.331052395754644	0.913109690050163	0.990877270468319	CRHR2	cg26126367	441	-0.329684010648231	0.873718756426538	0.964103455367214	AVP	cg06841846	441	0.143618413773337	0.913323339764481	0.998275311105479	HTR4	cg11491381	441	-0.24172665318052	0.918064239266677	0.998268125304863	AKR1D1
cg26126367	441	-0.12311011163211	0.908119461021679	0.98821050722751	AVP	cg13381984	441	-0.0388039354659984	0.908560229545957	0.995266283348139	HTR5A	cg24425171	441	0.148260929451236	0.911617444829475	0.993106697966735	CRHR1	cg08273233	441	0.0813798287481067	0.916598829913379	0.990877270468319	SRD5A1	cg02534661	441	-0.502218474809995	0.877214368940509	0.965606466313211	DHRS9	cg07833420	441	0.107430777914128	0.913846816835334	0.998275311105479	DRD1	cg15719652	441	-0.110355611512163	0.919024771791483	0.998268125304863	HTR7
cg04900872	441	0.0512738645372723	0.909176549538647	0.98821050722751	HTRA3	cg24610236	441	0.0757610416449378	0.91074160357565	0.995266283348139	ACE	cg11338049	441	0.18912779087751	0.911741162679189	0.993106697966735	DDC	cg15607306	441	0.043451044988684	0.918496304109936	0.990877270468319	HTRA1	cg16834011	441	-0.220080938329414	0.878913237484711	0.965606466313211	HTR7	cg11564670	441	0.0523563758379558	0.916558663890411	0.998275311105479	LEP	cg25782665	441	-0.0722887801774309	0.919131833035484	0.998268125304863	MC4R
cg07733851	441	0.0823310496399741	0.909542857549001	0.98821050722751	NR3C1	cg10686375	441	-0.493698420025395	0.913454651617884	0.995266283348139	HTR1E	cg25022311	441	0.0465348431111118	0.912570398388183	0.993106697966735	CRHR1	cg16012111	441	-0.262622565888022	0.919379656679284	0.990877270468319	HTRA1	cg15615793	441	0.102201919614193	0.879687554471916	0.965606466313211	HTRA1	cg25551168	441	-0.157958427201519	0.916905507373097	0.998275311105479	MC2R	cg17305181	441	-0.0611647295358551	0.919137315771151	0.998268125304863	TH
cg27503360	441	-0.0765788246341206	0.911046089740648	0.98821050722751	COMT	cg14692377	441	0.261951069160059	0.913880223475206	0.995266283348139	CRH	cg10906284	441	-0.0310571420757748	0.913542332647191	0.993106697966735	CRHR2	cg17220584	441	0.0340303537155186	0.919903657973966	0.990877270468319	HTR3A	cg06033660	441	0.119350316801729	0.882934168121993	0.965606466313211	NR3C2	cg03591753	441	-0.119260005727781	0.917058501450851	0.998275311105479	POMC	cg12816057	441	-0.0512214252569862	0.920618110787959	0.998268125304863	DDC
cg24353392	441	-0.0811456405277568	0.913499873999904	0.98821050722751	PRKAR1A	cg02501334	441	0.324522207078789	0.915584658017655	0.995266283348139	POMC	cg08372315	441	0.0681269235151972	0.915249043390822	0.993106697966735	NR3C1	cg26724798	441	0.0280410914190026	0.920654842969326	0.990877270468319	COMT	cg18849621	441	-0.253166992212507	0.883032051149911	0.965606466313211	TPH1	cg01614101	441	-0.0512148360364812	0.917107820248742	0.998275311105479	H6PD	cg27549720	441	-0.0621239000206022	0.921696323607777	0.998268125304863	COMT
cg27051089	441	-0.0350431912825117	0.915245904436758	0.98821050722751	COMT	cg09201719	441	-0.364779620848692	0.915882580440121	0.995266283348139	HTR1E	cg14127947	441	-0.0526929470449409	0.918993609293226	0.993106697966735	AKR1D1	cg04490037	441	0.0445178655296217	0.921157234598561	0.990877270468319	DRD3	cg21657705	441	0.120180400362665	0.88330645551969	0.965606466313211	SERPINA6	cg18845001	441	-0.0492962803285293	0.917349885776349	0.998275311105479	HTR3A	cg13781869	441	-0.0932688205398229	0.923936246114317	0.998268125304863	LEP
cg19802564	441	-0.0375198014412463	0.916611802048308	0.98821050722751	TPH2	cg16332610	441	0.241424169533666	0.916515252496575	0.995266283348139	HTR7	cg21478490	441	0.043828222990197	0.919775912564617	0.993106697966735	SERPINA6	cg20981893	441	0.114581450218653	0.921598899634066	0.990877270468319	HTR2A	cg17772763	441	-0.182869886409099	0.887253651670665	0.965606466313211	HTR3A	cg08845721	441	-0.103944905926976	0.926590093197796	0.998275311105479	PROP1	cg02992588	441	-0.0528861949627796	0.924217443161043	0.998268125304863	DHRS9
cg19303305	441	-0.0608051874998578	0.917188921412502	0.98821050722751	TH	cg07658503	441	0.111041198597586	0.916525895534129	0.995266283348139	DRD1	cg24877195	441	-0.231402734195262	0.919916764642509	0.993106697966735	ACE	cg14402224	441	0.0700667737586051	0.921719272005472	0.990877270468319	CRH	cg08586216	441	-1.0071122841123	0.888321730583944	0.965606466313211	NR3C1	cg20336341	441	-0.107308371746069	0.928147480487621	0.998275311105479	TPH2	cg23549160	441	0.254592347665323	0.925894519538591	0.998268125304863	PRKAR1A
cg25782665	441	-0.0469498515249707	0.917374318257208	0.98821050722751	MC4R	cg14558428	441	0.0190218615042506	0.924919372609454	0.995266283348139	CRH	cg01274715	441	0.178577973719326	0.920478629999547	0.993106697966735	HTR6	cg09277575	441	0.0299262724164591	0.922820150614736	0.990877270468319	HTR1E	cg10135483	441	0.0775078752532346	0.889004685447256	0.965606466313211	HTR1E	cg02040921	441	-0.321110303788057	0.928306811447131	0.998275311105479	TBX19	cg00923860	441	0.079225941001482	0.930894937676325	0.998268125304863	H6PD
cg19125767	441	-0.0504204877392563	0.921742246664946	0.98821050722751	DRD2	cg26126367	441	0.13535421577987	0.92574341241912	0.995266283348139	AVP	cg12751005	441	-0.107718392356052	0.922246038525952	0.993106697966735	DDC	cg12577105	441	0.242797087275509	0.923495596555111	0.990877270468319	DDC	cg20178075	441	0.070975690994678	0.889031106824549	0.965606466313211	AVPR1A	cg00358132	441	-0.104135289147394	0.928572625331975	0.998275311105479	HTR6	cg19354750	441	0.231699078537605	0.932902916785086	0.998268125304863	HTR3A
cg00310588	441	-0.0373579202837731	0.923340285816691	0.98821050722751	HSD11B1	cg16830379	441	-0.056361108562662	0.927534053385858	0.995266283348139	HTRA1	cg09920557	441	-0.362033374425446	0.922797093255197	0.993106697966735	HTR1E	cg06492144	441	0.0301054101560428	0.923755856754521	0.990877270468319	PROP1	cg14791547	441	-0.567494233788163	0.890312514529945	0.965606466313211	CYP11B1	cg09191750	441	-0.183776198027733	0.929516238810093	0.998275311105479	FKBP5	cg26135506	441	0.355345303546041	0.934031429212316	0.998268125304863	AVP
cg25940513	441	-0.0584876960340098	0.924002643715578	0.98821050722751	MC2R	cg09914773	441	0.0654419622793772	0.927931944023676	0.995266283348139	FKBP5	cg22812013	441	0.0917958377424468	0.922901633778263	0.993106697966735	HSD11B2	cg21164131	441	-0.022116399553304	0.924542110342587	0.990877270468319	HTR2A	cg09191750	441	0.280903098617709	0.891121562720173	0.965606466313211	FKBP5	cg23365637	441	-0.313737564468303	0.93003106417374	0.998275311105479	ACE	cg18023598	441	0.126520246859125	0.935300120000222	0.998268125304863	TH
cg27646908	441	-0.219672190089137	0.92446705461489	0.98821050722751	COMT	cg04768425	441	0.0414344929493423	0.930722416432014	0.995266283348139	NR3C2	cg08569242	441	-0.369597529020938	0.923325016897846	0.993106697966735	HTR4	cg17537380	441	-0.0307521165547426	0.924900767858747	0.990877270468319	HTR3B	cg04422019	441	0.18114527485323	0.892136409093728	0.965606466313211	DRD3	cg04863452	441	0.118808939292642	0.93008762550321	0.998275311105479	NR3C2	cg08569242	441	-0.357965834204316	0.938597601421225	0.998268125304863	HTR4
cg17030679	441	0.0507665508361165	0.925660009984982	0.98821050722751	HTRA1	cg25276126	441	-0.040383619760255	0.930741845068945	0.995266283348139	SLC6A4	cg24026230	441	-0.0186878536161964	0.925945158025813	0.993106697966735	PRKAR1A	cg14558428	441	-0.0147989533780147	0.929859089116228	0.990877270468319	CRH	cg05885577	441	-0.0996415219166042	0.895238753007333	0.967538553396211	HTRA3	cg13051970	441	0.0864127615874968	0.930331583660398	0.998275311105479	DDC	cg00022871	441	-0.0796539683778804	0.93890116263639	0.998268125304863	HTR6
cg11712482	441	0.059084314016759	0.925782730364254	0.98821050722751	HTR5A	cg11111332	441	-0.0550294148822694	0.933133244412882	0.995266283348139	CRHR2	cg02276314	441	-0.0759259275378273	0.928089767096013	0.993106697966735	DHRS9	cg04607131	441	-0.040253136552462	0.931141304532318	0.990877270468319	NR3C2	cg03843951	441	0.129294181302864	0.897741160910502	0.967538553396211	POMC	cg04111177	441	0.445383195225275	0.930363581246172	0.998275311105479	SRD5A2	cg04422019	441	0.0805140313496158	0.94057090742609	0.998268125304863	DRD3
cg27410679	441	-0.0504832430073329	0.928372118476039	0.98821050722751	COMT	cg12758687	441	-0.0415716702546138	0.93352299616134	0.995266283348139	LEP	cg05779523	441	0.0380206709634522	0.928634774414778	0.993106697966735	HTRA3	cg25022311	441	0.0313097208141308	0.932608445654784	0.990877270468319	CRHR1	cg06841846	441	0.164338383069267	0.898597762878184	0.967538553396211	HTR4	cg06045576	441	0.0873218716921299	0.930392579951175	0.998275311105479	HTRA3	cg19125767	441	0.0583156215152719	0.942528201077436	0.998268125304863	DRD2
cg14174946	441	0.019643180147491	0.929234539368475	0.98821050722751	DDC	cg08569242	441	0.323167041025213	0.934706843897129	0.995266283348139	HTR4	cg12793238	441	0.209475783443266	0.929248875975683	0.993106697966735	DDC	cg12017635	441	-0.0390732606818582	0.932672284307011	0.990877270468319	DDC	cg19837528	441	0.14303386041002	0.901047910032377	0.967538553396211	AVPR1A	cg08273233	441	-0.118384855520046	0.932286283721493	0.998275311105479	SRD5A1	cg16834011	441	0.0814519456341283	0.944756467273882	0.998268125304863	HTR7
cg04144768	441	-0.0626203452966542	0.932460854001712	0.98821050722751	HTR3C	cg04923928	441	-0.0380912643462329	0.935371475827352	0.995266283348139	HTRA3	cg00022871	441	-0.0753285717072463	0.930111782856025	0.993106697966735	HTR6	cg26132809	441	0.0789700887918967	0.933231567557026	0.990877270468319	AVP	cg18701449	441	-0.071715915353484	0.903350147371478	0.967538553396211	DRD2	cg04632887	441	-0.178800135583237	0.93460919005139	0.998275311105479	HTRA3	cg07843056	441	-0.274956292450708	0.946491417953706	0.998268125304863	SRD5A1
cg00107488	441	0.0483631024334851	0.932631983009363	0.98821050722751	H6PD	cg22458194	441	-0.230649291980769	0.935456208937586	0.995266283348139	CYP11A1	cg27646908	441	0.261816404041726	0.930446423563642	0.993106697966735	COMT	cg27410679	441	0.0524972971566673	0.934621242426838	0.990877270468319	COMT	cg17095936	441	0.0572450229928966	0.903436040748935	0.967538553396211	HTR7	cg06033660	441	0.0684948166846916	0.935754503961565	0.998275311105479	NR3C2	cg00335286	441	-0.0358337116029545	0.949610595533318	0.998268125304863	H6PD
cg18200810	441	0.0355768611064181	0.933767577925462	0.98821050722751	HTR3B	cg19500607	441	-0.0361967240974172	0.935476893318453	0.995266283348139	TH	cg07194846	441	-0.0476461154972441	0.930897636765668	0.993106697966735	SRD5A1	cg23914842	441	-0.0241637103664477	0.935072977189491	0.990877270468319	PRKAR1A	cg08636224	441	0.428876745075162	0.904043269437982	0.967538553396211	SRD5A1	cg14847514	441	-0.102277987522057	0.937092314102971	0.998275311105479	HTRA1	cg15347662	441	-0.0971812160739449	0.949902454999148	0.998268125304863	HTRA1
cg00363114	441	-0.0312823266766915	0.936330563973022	0.98821050722751	HSD11B1	cg23042775	441	0.0454311859934688	0.936644288798281	0.995266283348139	HSD11B2	cg06941869	441	0.0414343778333897	0.931670430212641	0.993106697966735	SRD5A1	cg25551168	441	-0.0691623211776988	0.935579871761569	0.990877270468319	MC2R	cg03216867	441	-0.131846298727093	0.905407717963782	0.967538553396211	POMC	cg11916054	441	-0.0923225186117464	0.937604466406811	0.998275311105479	HTR5A	cg13381984	441	0.0240865381715177	0.950674375015064	0.998268125304863	HTR5A
cg27640254	441	-0.0421358731561556	0.936343168540783	0.98821050722751	COMT	cg10335743	441	-0.0494085195530323	0.939499917575281	0.995266283348139	FKBP5	cg15003182	441	-0.0697974062635543	0.932222594601993	0.993106697966735	HTRA1	cg15001032	441	0.0420978352178393	0.936265382577145	0.990877270468319	HTR7	cg19930203	441	0.114871883825653	0.905752803383138	0.967538553396211	TPH2	cg10045137	441	0.206320237172066	0.938767482556922	0.998275311105479	FKBP5	cg15572496	441	0.0491312261442951	0.953422351602482	0.998268125304863	CYP17A1
cg11564670	441	0.0196059598764361	0.936440262296579	0.98821050722751	LEP	cg18146873	441	0.218283963003386	0.93977032789977	0.995266283348139	TH	cg14896516	441	-0.0465451300310191	0.934404907356729	0.993106697966735	HTRA1	cg08447739	441	0.0477881774984852	0.93693238294015	0.990877270468319	HTR4	cg19226017	441	0.12023546354453	0.90765919591258	0.968026214559272	HTR3A	cg00446087	441	-0.165048280529685	0.939036998543723	0.998275311105479	HSD11B1	cg18226539	441	0.0400449788712792	0.954511406135078	0.998268125304863	HTR3A
cg11338426	441	-0.108568359707847	0.937826887192555	0.98821050722751	DDC	cg24105933	441	-0.122119748149898	0.94319301286698	0.995266283348139	SLC6A4	cg21905167	441	-0.0914473285204275	0.935239409873204	0.993106697966735	CYP11A1	cg20246820	441	-0.19406849236905	0.938381676287028	0.990877270468319	TPH2	cg04199779	441	-0.665154250942509	0.908839829158229	0.968026214559272	DRD3	cg25669230	441	-0.077109049465623	0.94047805624178	0.998275311105479	MC4R	cg23914842	441	0.0227545774683657	0.955606001200651	0.998268125304863	PRKAR1A
cg10185667	441	-0.130847379179001	0.93851264719768	0.98821050722751	HTR1E	cg21224972	441	0.0278576680643697	0.943694780878516	0.995266283348139	HTR2A	cg27130954	441	-0.0876449883665901	0.935752580263491	0.993106697966735	COMT	cg01274715	441	0.115405555643526	0.940415488914209	0.990877270468319	HTR6	cg04493143	441	-0.10667182233217	0.911875191508586	0.968175106070143	HTR3C	cg02250787	441	-0.0716419218189601	0.942757113147769	0.998275311105479	POMC	cg27521571	441	0.0277056237060132	0.956051057734265	0.998268125304863	COMT
cg09916783	441	-0.0433646392341098	0.93911290055873	0.98821050722751	FKBP5	cg24547396	441	-0.0838488612693195	0.944444188485444	0.995266283348139	SLC6A4	cg07075299	441	-0.146402947822022	0.935970183102951	0.993106697966735	NR3C1	cg02965092	441	0.0269119233659932	0.941105131260497	0.990877270468319	POMC	cg09318122	441	0.0577356139885986	0.91260729599324	0.968175106070143	FKBP5	cg27528351	441	0.0805124378416479	0.943162392041786	0.998275311105479	COMT	cg01845356	441	-0.0342218799357394	0.95677160952695	0.998268125304863	H6PD
cg08400935	441	0.0469765592254579	0.939842028834143	0.98821050722751	NR3C1	cg06787004	441	0.126879851117157	0.946535652380103	0.995266283348139	DRD1	cg11469319	441	-0.158296974408806	0.936434848354503	0.993106697966735	CRHR2	cg13521908	441	-0.134375130198832	0.944052716897705	0.990877270468319	DDC	cg01620540	441	0.0633095053080384	0.912925983169402	0.968175106070143	HTR6	cg09920557	441	0.412037329094059	0.943937434293584	0.998275311105479	HTR1E	cg18849621	441	-0.0747916496664514	0.957270772397089	0.998268125304863	TPH1
cg15868400	441	0.0793304137451287	0.947629922842328	0.98821050722751	HTRA1	cg23027580	441	-0.159361260502373	0.94783055412556	0.995266283348139	HSD11B2	cg23532924	441	-0.0322608988355489	0.943594973415473	0.997591469886929	ACE	cg26022526	441	0.19929131010262	0.94683663759206	0.990877270468319	MC2R	cg07075299	441	0.299216185052717	0.915471793759213	0.969478043462994	NR3C1	cg20629239	441	0.174415112780784	0.944155123830994	0.998275311105479	TPH2	cg00629244	441	-0.252182332601616	0.95756833150792	0.998268125304863	HTR6
cg13251292	441	-0.0168961738712866	0.949695000617443	0.98821050722751	DDC	cg11298960	441	-0.0389051615830464	0.949089872584337	0.995266283348139	DDC	cg00562879	441	0.168628567086702	0.946879891772377	0.997591469886929	H6PD	cg06087101	441	0.0312641142328909	0.947023200532647	0.990877270468319	HTRA3	cg00701951	441	0.118005094790654	0.917866595999283	0.970617549792345	HSD11B1	cg09714615	441	0.0274912317732104	0.945913270466916	0.998275311105479	HTR1E	cg04204669	441	0.0356418590413561	0.960623886578138	0.998268125304863	DRD3
cg19107055	441	-0.0272316608350886	0.951318371867537	0.98821050722751	HTR3B	cg11152298	441	0.295223718385816	0.949252689111116	0.995266283348139	HTR5A	cg01049782	441	0.0390932630630277	0.946948928719817	0.997591469886929	HSD11B1	cg10712173	441	-0.216042074983071	0.94740363830715	0.990877270468319	LEP	cg07304526	441	0.180702648999889	0.920710806044029	0.972228340385087	PROP1	cg11157691	441	0.0569212599201173	0.947570132652584	0.998275311105479	LEP	cg16586394	441	-0.0504656533088442	0.960703044414342	0.998268125304863	HTRA1
cg09516959	441	-0.0192989861650647	0.951354276126336	0.98821050722751	HTR1E	cg11150353	441	-0.141469251579923	0.950262020029783	0.995266283348139	DDC	cg25782665	441	0.0362008881527471	0.950926222717042	0.997591469886929	MC4R	cg17647537	441	0.017486762459816	0.948441850520009	0.990877270468319	TH	cg26638505	441	0.0387646189993184	0.92696258924005	0.974732866001014	COMT	cg03667083	441	0.0555601095421457	0.948041536864853	0.998275311105479	DHRS9	cg14199144	441	-0.0278190860734935	0.960951015517688	0.998268125304863	DDC
cg15912040	441	-0.0703015121172492	0.951486054587832	0.98821050722751	HTRA1	cg00025823	441	-0.0272602393543428	0.952219218253649	0.995266283348139	H6PD	cg03560973	441	-0.035574804757344	0.955144023592995	0.997591469886929	SRD5A2	cg10045137	441	0.0971651338749055	0.949391560138829	0.990877270468319	FKBP5	cg25190094	441	-0.363553995076222	0.92724670917603	0.974732866001014	PRKAR1A	cg07760722	441	0.128193688601381	0.948090275085231	0.998275311105479	HTR4	cg27345592	441	-0.0579379951318108	0.962623046795321	0.998268125304863	COMT
cg24922596	441	-0.0187361254449057	0.952333656681825	0.98821050722751	ACE	cg25271841	441	0.0209215605345786	0.954083582900691	0.995266283348139	CRHR1	cg20016411	441	-0.017731116516352	0.955783025330307	0.997591469886929	AVPR1A	cg00862770	441	-0.212397533773694	0.950434319649868	0.990877270468319	HSD11B1	cg02261408	441	-0.0768670643225219	0.929618244490818	0.974732866001014	SRD5A2	cg25940513	441	-0.075062343793822	0.95143797297169	0.999727426383609	MC2R	cg11152298	441	0.24375696658127	0.964179976289517	0.998268125304863	HTR5A
cg00242031	441	-0.0214165743371173	0.953102364893568	0.98821050722751	H6PD	cg23035419	441	0.0673586407111129	0.955650647501783	0.995266283348139	HSD11B2	cg12908660	441	-0.0265204702483724	0.95651667228478	0.997591469886929	HTR5A	cg17030679	441	0.0384710091467209	0.950434497784933	0.990877270468319	HTRA1	cg23851685	441	-0.0610941098290604	0.929875292926672	0.974732866001014	PRKAR1A	cg18442632	441	0.0491380975364099	0.952186040618085	0.999727426383609	TH	cg23791011	441	0.0717865376240035	0.966109549780941	0.998268125304863	ACE
cg13131263	441	-0.140372110075616	0.954010546456259	0.98821050722751	DDC	cg01294490	441	-0.0886055791229234	0.955828186447294	0.995266283348139	H6PD	cg27090784	441	0.0774710125279542	0.95729776275085	0.997591469886929	COMT	cg10650018	441	-0.0136357538391899	0.951082330278259	0.990877270468319	FKBP5	cg15835825	441	-0.128619521398909	0.932688197245065	0.974732866001014	HTRA1	cg10323433	441	-0.0317605488815684	0.959505999940154	0.99982346178521	FKBP5	cg00862770	441	-0.197780316102804	0.96699423911537	0.998268125304863	HSD11B1
cg11491381	441	-0.0821063108367148	0.954735435520122	0.98821050722751	AKR1D1	cg13051970	441	0.036557243261099	0.956468964720388	0.995266283348139	DDC	cg12580770	441	0.0126507271242295	0.957418958666841	0.997591469886929	DDC	cg09122657	441	-0.227455287112162	0.951647536564798	0.990877270468319	HTR1E	cg18283321	441	0.104673103261013	0.932934883396177	0.974732866001014	HTR3A	cg23913482	441	0.217789709628795	0.961282112309292	0.99982346178521	CRHR1	cg09191750	441	0.0679079599398696	0.967062067608034	0.998268125304863	FKBP5
cg09199250	441	-0.0256475192355747	0.954901069924358	0.98821050722751	FKBP5	cg19815720	441	-0.0257109331399402	0.956835906975295	0.995266283348139	TPH2	cg10644575	441	-0.0181104740630026	0.957563054520992	0.997591469886929	HTR1E	cg25446361	441	-0.0268258930606055	0.953101471128766	0.990877270468319	CRHR1	cg23027580	441	-0.289429694530532	0.93315231978457	0.974732866001014	HSD11B2	cg24105933	441	-0.122249211021218	0.961993009888881	0.99982346178521	SLC6A4	cg20423536	441	0.0364554795950926	0.970907887296888	0.998268125304863	TPH2
cg21094739	441	-0.0312307320786502	0.954910145504283	0.98821050722751	HTR2A	cg04199256	441	-0.0581617767160076	0.957645884978142	0.995266283348139	DRD3	cg21878188	441	0.211804281588359	0.958869896238512	0.997591469886929	CYP11A1	cg24257309	441	-0.044886516684794	0.954530857075879	0.990877270468319	CRHR1	cg00022871	441	-0.106712507896767	0.934023351134645	0.974732866001014	HTR6	cg00629244	441	-0.283649866707853	0.963143112043067	0.99982346178521	HTR6	cg10288772	441	0.0998808886077865	0.971591247240696	0.998268125304863	FKBP5
cg21080473	441	-0.0162487709038731	0.955536859646733	0.98821050722751	HTR2A	cg13094036	441	-0.0317981699192159	0.958745534317311	0.995266283348139	LEP	cg05346287	441	-0.0285015043996665	0.960164152576585	0.997591469886929	NR3C2	cg14896516	441	0.0270184371057649	0.956184707906288	0.990877270468319	HTRA1	cg22614355	441	0.181105086289948	0.935001906789017	0.974732866001014	HSD11B2	cg17647537	441	0.0175512962950276	0.970963297317116	0.99982346178521	TH	cg26969596	441	0.0152534709888846	0.972482369646405	0.998268125304863	COMT
cg19233761	441	0.0212864741943939	0.956531605628667	0.98821050722751	HTR3B	cg15910486	441	0.102005261002676	0.959640193986651	0.995266283348139	HTRA1	cg05141787	441	0.0299378606276751	0.96299727512463	0.997591469886929	HTRA3	cg25782665	441	-0.027158324203281	0.958039819115694	0.990877270468319	MC4R	cg07545640	441	-0.482612635779074	0.941460838784724	0.978241154568915	NR3C1	cg03084214	441	0.023435966737143	0.971848578360446	0.99982346178521	POMC	cg20494779	441	-0.0164962482561039	0.973051404560302	0.998268125304863	AVPR1A
cg18450270	441	0.0233111898905462	0.958703441591285	0.98821050722751	DRD2	cg00666422	441	0.0129884219445622	0.961446359891275	0.995266283348139	HTR6	cg25780543	441	-0.0301982087906393	0.963424693743157	0.997591469886929	MC4R	cg18007806	441	-0.01794251866487	0.958292906485995	0.990877270468319	HTR3A	cg11338049	441	-0.185576714050401	0.941913947582928	0.978241154568915	DDC	cg07528216	441	0.0288691283364365	0.971935192751655	0.99982346178521	NR3C1	cg18595639	441	0.075319578872031	0.973227697741886	0.998268125304863	DRD2
cg08389266	441	0.0186676829591665	0.960320119441174	0.98821050722751	NR3C1	cg21080473	441	-0.0187085484472326	0.962587261871685	0.995266283348139	HTR2A	cg16811558	441	0.0537200199031148	0.964236483105381	0.997591469886929	HTRA1	cg07658503	441	0.045964310144365	0.958615026275512	0.990877270468319	DRD1	cg27646908	441	-0.332251276744805	0.942354590474675	0.978241154568915	COMT	cg14170547	441	-0.032165043234036	0.972459993783601	0.99982346178521	LEP	cg07304526	441	-0.0490694503697359	0.973544608824948	0.998268125304863	PROP1
cg24680141	441	-0.126870812848348	0.960504432634992	0.98821050722751	ACE	cg19730798	441	0.160510223840558	0.964719198067375	0.995266283348139	TPH2	cg08929103	441	-0.0192410741767268	0.970439409203025	0.997591469886929	NR3C1	cg02079741	441	-0.0252167169379187	0.959637092199678	0.990877270468319	HSD11B1	cg13748928	441	0.171169530213227	0.94552129987554	0.980146023532954	DDC	cg26656751	441	-0.0377152756174431	0.973177621108613	0.99982346178521	COMT	cg19715936	441	0.06503084145206	0.975506682548024	0.998268125304863	TH
cg02711929	441	-0.0215770420335894	0.962146942775243	0.98821050722751	SRD5A2	cg19125767	441	0.0306793494232979	0.964921333243588	0.995266283348139	DRD2	cg00674304	441	0.0740615501143733	0.972876804894309	0.997591469886929	H6PD	cg20073007	441	-0.0418912689910653	0.960378041845727	0.990877270468319	TPH2	cg26880525	441	-0.0862504825859329	0.950065307843725	0.983471261002787	COMT	cg26969596	441	-0.0185559406028862	0.9741526972284	0.99982346178521	COMT	cg15692052	441	0.0279633132531558	0.976301088069648	0.998268125304863	CYP17A1
cg26814075	441	-0.0126792398325744	0.96247158981311	0.98821050722751	COMT	cg02711929	441	-0.0269832832042547	0.965442335059914	0.995266283348139	SRD5A2	cg25730237	441	0.0290049490789331	0.973396998298064	0.997591469886929	MC4R	cg00242031	441	0.0203428017541333	0.960861668542838	0.990877270468319	H6PD	cg15971888	441	-0.159413419706652	0.952385514619606	0.984488397134873	HTRA1	cg19628225	441	-0.0223793737884581	0.974952500253479	0.99982346178521	TH	cg17015994	441	-0.0196286276783361	0.979661939835821	0.998268125304863	HTRA1
cg05016953	441	-0.166421970861575	0.963105407497375	0.98821050722751	NR3C2	cg25940513	441	0.0361775713155943	0.965560076220876	0.995266283348139	MC2R	cg02661802	441	0.140869612652341	0.973515617057237	0.997591469886929	DHRS9	cg09714615	441	-0.0109808070641405	0.96150388953853	0.990877270468319	HTR1E	cg00629244	441	-0.332648439698153	0.954854906333922	0.985656677505984	HTR6	cg21478490	441	-0.0209764052638342	0.975467000771701	0.99982346178521	SERPINA6	cg04424630	441	-0.103831204198614	0.979867458691011	0.998268125304863	HTR3C
cg25271841	441	-0.0117132874036748	0.964815535422368	0.98821050722751	CRHR1	cg09199250	441	0.0249611641484405	0.967598227817143	0.995266283348139	FKBP5	cg09277575	441	-0.0111899449303668	0.974710746936373	0.997591469886929	HTR1E	cg08569242	441	0.155979794327925	0.962521381737976	0.990877270468319	HTR4	cg04087608	441	0.0644672408316104	0.957475777499098	0.986977832267978	POMC	cg09147827	441	0.0134902814013432	0.975914963616554	0.99982346178521	FKBP5	cg12751005	441	0.0334554805589611	0.979932931505537	0.998268125304863	DDC
cg04087608	441	-0.0266271057456873	0.965764500364235	0.98821050722751	POMC	cg26132809	441	-0.0457682663640599	0.967602817457492	0.995266283348139	AVP	cg06521673	441	-0.131961515895359	0.975401387184384	0.997591469886929	DRD1	cg01335087	441	0.0367777789280151	0.963568719389198	0.990877270468319	H6PD	cg09199250	441	-0.0455977990042131	0.95900545528305	0.98717204907458	FKBP5	cg15347662	441	-0.0532545776614647	0.978451724201819	0.99982346178521	HTRA1	cg24862443	441	-0.0509405826699182	0.982540496296646	0.998268125304863	ACE
cg25446361	441	-0.0171076436869582	0.965853013920672	0.98821050722751	CRHR1	cg01819552	441	-0.0163517745274349	0.969643347966846	0.995266283348139	H6PD	cg27304079	441	-0.0996426871670128	0.975531021813745	0.997591469886929	COMT	cg24547396	441	0.0432659693431348	0.965527229137933	0.990877270468319	SLC6A4	cg17805199	441	0.0839428387299548	0.962146691900003	0.987229311984141	DRD2	cg06937024	441	-0.160101398039285	0.978835763094789	0.99982346178521	PROP1	cg21644468	441	0.0145998991254722	0.982693392465177	0.998268125304863	SERPINA6
cg12746356	441	-0.160603616564509	0.966176556172137	0.98821050722751	HTR5A	cg20016411	441	-0.0115333369379829	0.972415142185618	0.995266283348139	AVPR1A	cg10847032	441	0.00609034229601362	0.977820945542119	0.997591469886929	HTR5A	cg18865272	441	-0.0635440704495699	0.966495746782445	0.990877270468319	DRD2	cg17736230	441	-0.113930106259688	0.964948148125997	0.987229311984141	TH	cg00335286	441	-0.0193401752754949	0.979082793373583	0.99982346178521	H6PD	cg00140191	441	0.0690737919524444	0.983571501976853	0.998268125304863	HTR6
cg01926269	441	-0.0486568239611752	0.966368835189915	0.98821050722751	H6PD	cg19194405	441	-0.037266283881122	0.972704993303126	0.995266283348139	TH	cg06346307	441	0.025157604310318	0.977852406314803	0.997591469886929	HTR4	cg09672383	441	0.0115167196422957	0.9666438589623	0.990877270468319	FKBP5	cg23570923	441	-0.0736184026196456	0.965889504382104	0.987229311984141	SLC6A4	cg17342132	441	0.0355922582482018	0.979652167542854	0.99982346178521	HTR3B	cg23185751	441	0.0117833554509774	0.984350726917137	0.998268125304863	CRHR1
cg00840332	441	-0.00894612088074511	0.966412660061444	0.98821050722751	H6PD	cg09516959	441	-0.0144548325805688	0.9731847191784	0.995266283348139	HTR1E	cg21702128	441	-0.00546253879164496	0.978487812653011	0.997591469886929	CYP11A1	cg23881278	441	-0.0893288782874277	0.971948752057937	0.991539868894934	PRKAR1A	cg06457577	441	-0.138918724303861	0.966683047625262	0.987229311984141	DRD1	cg07075299	441	0.0689542828263047	0.980443175594213	0.99982346178521	NR3C1	cg16545496	441	0.0231489724933944	0.984393777684081	0.998268125304863	HTRA1
cg05756489	441	0.0118527283236467	0.966727670113869	0.98821050722751	HTRA3	cg14855334	441	0.139735889553917	0.974417348521363	0.995266283348139	HTR7	cg13748928	441	0.0437928080877596	0.979187637454267	0.997591469886929	DDC	cg12728623	441	-0.0506021368249938	0.972065330419296	0.991539868894934	LEP	cg00335286	441	-0.029006915706143	0.966821794556074	0.987229311984141	H6PD	cg26332534	441	0.127534746051625	0.981070314453443	0.99982346178521	AVP	cg23951474	441	-0.0128145739574397	0.984397327410981	0.998268125304863	CRHR1
cg08569242	441	-0.110935278727302	0.969695668351614	0.989248258489761	HTR4	cg05016953	441	0.15395031561487	0.974982323769033	0.995266283348139	NR3C2	cg27640254	441	0.0175750111736902	0.979639327887726	0.997591469886929	COMT	cg08791953	441	0.0110384266629932	0.972272970892767	0.991539868894934	NR3C1	cg04566694	441	0.0447760356030101	0.968105301632291	0.987229311984141	HTRA3	cg25058023	441	0.0113162618040091	0.983382963160517	0.99982346178521	ACE	cg12367389	441	-0.0142417088465976	0.985735804633773	0.998268125304863	DDC
cg20494779	441	0.0114825782279861	0.970431036181531	0.989248258489761	AVPR1A	cg25022311	441	-0.0118338869197725	0.978746311857273	0.996245676986644	CRHR1	cg05951817	441	0.01423371348572	0.981031731056718	0.997591469886929	NR3C2	cg20016411	441	-0.00929864130074783	0.973395561222947	0.991539868894934	AVPR1A	cg18023598	441	-0.0743722372893575	0.969011222080749	0.987229311984141	TH	cg24661173	441	-0.012893296591284	0.984004230475231	0.99982346178521	ACE	cg12782180	441	0.0096853277356584	0.986125961527743	0.998268125304863	CRHR2
cg08273233	441	-0.0219357576531851	0.974331816127921	0.990683427238019	SRD5A1	cg13365022	441	-0.0144337212130418	0.980523483934387	0.996245676986644	AKR1D1	cg16335926	441	-0.0452599677777691	0.982654760246241	0.997591469886929	HTRA1	cg24026230	441	0.00574306106575116	0.974026257080214	0.991539868894934	PRKAR1A	cg26274946	441	0.111484926767192	0.9710998304681	0.987229311984141	AVP	cg20813374	441	-0.0210905953747992	0.985030671946458	0.99982346178521	HTR2A	cg01192538	441	0.00776323460789577	0.987578098640652	0.998268125304863	H6PD
cg23881368	441	0.0134048636909607	0.974530980054791	0.990683427238019	CRHR1	cg07648740	441	-0.0210483888053679	0.98113807408344	0.996245676986644	HTR4	cg15719652	441	-0.0190956562619565	0.983026921973361	0.997591469886929	HTR7	cg17805199	441	-0.0209264347038491	0.983908957155988	0.99741628752328	DRD2	cg07061368	441	-0.0383166007694272	0.971928814503487	0.987229311984141	NR3C1	cg11298960	441	0.0171366245757903	0.985048604897526	0.99982346178521	DDC	cg11338426	441	-0.0345354438487565	0.987727031185386	0.998268125304863	DDC
cg19815720	441	-0.00924736947774002	0.978968302416984	0.993821614591587	TPH2	cg26344168	441	-0.00497463623024335	0.982702866193257	0.996245676986644	AVP	cg23974739	441	-0.0112975874206883	0.983806445265371	0.997591469886929	ACE	cg09916783	441	0.0127814345537938	0.984227277477575	0.99741628752328	FKBP5	cg04750517	441	-0.12507716561178	0.972474526071335	0.987229311984141	HTRA3	cg00107488	441	0.0181643092763628	0.987493946407891	0.99982346178521	H6PD	cg24433738	441	0.0250847267631648	0.987895279792539	0.998268125304863	CRHR1
cg02040921	441	-0.0382073544147676	0.982475280632827	0.994986118929332	TBX19	cg25725890	441	-0.0748316878756124	0.983402291167658	0.996245676986644	MC2R	cg19930203	441	0.0104677600776162	0.987239660146699	0.997591469886929	TPH2	cg05756489	441	0.00596720973657912	0.985279946269346	0.99741628752328	HTRA3	cg11111332	441	-0.0298658695210408	0.974785068821427	0.988211860402989	CRHR2	cg22442841	441	0.0232965049144659	0.989089027068803	0.99982346178521	CYP11A1	cg10025865	441	0.00459746442507629	0.990155550532807	0.998268125304863	HTR1E
cg00308665	441	-0.00573412856261259	0.98467936771615	0.994986118929332	H6PD	cg16003049	441	0.0111510428512578	0.984741019391433	0.996245676986644	HTRA1	cg00701951	441	-0.0116457859820053	0.987720596437727	0.997591469886929	HSD11B1	cg07724674	441	-0.0612265268309654	0.985715253749503	0.99741628752328	NR3C1	cg08929103	441	0.0216453585844087	0.977460389122352	0.989560999166508	NR3C1	cg12577105	441	-0.0467156369800731	0.991898772326118	0.99982346178521	DDC	cg04493143	441	0.00818715753009768	0.991308482984359	0.998268125304863	HTR3C
cg06941869	441	-0.00709734006230939	0.984750559235484	0.994986118929332	SRD5A1	cg02440279	441	-0.0701631911408961	0.987383233508141	0.996245676986644	POMC	cg00446087	441	0.0195154071156361	0.989020517605011	0.997591469886929	HSD11B1	cg18660363	441	0.00312551259973449	0.989203886788244	0.99741628752328	TH	cg15912040	441	-0.0594486257920546	0.978980227149117	0.989738251623283	HTRA1	cg04199779	441	-0.0560699452915987	0.992347098450514	0.99982346178521	DRD3	cg04199256	441	0.013584098750372	0.991460560450781	0.998268125304863	DRD3
cg12816057	441	0.00586221063155767	0.985522935732993	0.994986118929332	DDC	cg07464571	441	0.0070644469145055	0.989427600169806	0.996245676986644	HTR4	cg12243453	441	0.00955033287892023	0.989684164706806	0.997591469886929	DDC	cg15888097	441	-0.00348843447758424	0.989573399073271	0.99741628752328	HTR7	cg20697172	441	-0.0148024681561644	0.98130895339446	0.990314308026253	TPH2	cg08033551	441	0.0110614935183084	0.993674377333217	0.99982346178521	NR3C1	cg10205430	441	-0.00882714428345954	0.991805566992237	0.998268125304863	FKBP5
cg13025668	441	0.017045593959862	0.98744790293256	0.99556391309365	DDC	cg02665568	441	0.0164377340958031	0.98955222022037	0.996245676986644	DHRS9	cg12639324	441	0.0296983047577978	0.990851001327222	0.997591469886929	DDC	cg18773997	441	-0.00653435305695772	0.989843114230369	0.99741628752328	DRD2	cg15347662	441	-0.0428060834791251	0.982241093558648	0.990314308026253	HTRA1	cg11514288	441	-0.00805062661368866	0.994684935182987	0.99982346178521	DDC	cg12793238	441	-0.0292514620794607	0.991822538763221	0.998268125304863	DDC
cg00701951	441	0.0066500657539661	0.990872290632205	0.997041530816053	HSD11B1	cg24870096	441	0.00596040306060859	0.990283658858817	0.996245676986644	PRKAR1A	cg12670061	441	0.0469383885505912	0.991098286128077	0.997591469886929	CRHR2	cg17637877	441	0.00451751435746541	0.990640361656954	0.99741628752328	DRD2	cg01614101	441	0.00932818950473867	0.984037017425296	0.990767776778411	H6PD	cg14059288	441	0.00955444435302031	0.996526230315443	0.99982346178521	HTR5A	cg01614101	441	0.00347841268716872	0.992658536136584	0.998268125304863	H6PD
cg05952120	441	-0.0171337564036089	0.991622826844226	0.997041530816053	HTRA3	cg02318454	441	-0.00510840519419354	0.990831298307369	0.996245676986644	POMC	cg04091563	441	0.00137263104306227	0.995253935629106	0.997591469886929	POMC	cg08400935	441	-0.00700912086174426	0.992094634971102	0.997515917129414	NR3C1	cg02318454	441	0.0086839872119615	0.989072429096882	0.994477196468996	POMC	cg11247289	441	-0.00497257124862445	0.996740731553616	0.99982346178521	DDC	cg26948603	441	0.0211222949402157	0.992842755058641	0.998268125304863	COMT
cg26464934	441	-0.00250907883036742	0.99453677724121	0.998013641388132	AVP	cg20967585	441	-0.00138238570344842	0.996327575743436	0.999789860850914	HTR2A	cg07658503	441	0.00600866849719893	0.995278966506651	0.997591469886929	DRD1	cg21661983	441	0.00400011826060675	0.994153427700185	0.998222268468399	SERPINA6	cg06787004	441	0.0267981749825865	0.992157489006542	0.995388197519224	DRD1	cg06521673	441	-0.0219753858058588	0.997386808156808	0.99982346178521	DRD1	cg07501070	441	0.00283848622569809	0.996932117144028	0.999522133180024	DRD1
cg26344168	441	-0.000981906566793988	0.995301647797403	0.998013641388132	AVP	cg15615793	441	0.00170159146888284	0.997073040576862	0.999789860850914	HTRA1	cg01335087	441	0.00518298299777926	0.995520601803059	0.997591469886929	H6PD	cg10913456	441	0.0220389688160397	0.995740414796115	0.998453603937249	CRHR2	cg14235676	441	0.0213820067387545	0.994316268494402	0.995388197519224	CRH	cg01294490	441	0.00555871768706829	0.998177781015763	0.99982346178521	H6PD	cg09516959	441	0.00183693050365768	0.997078650463594	0.999522133180024	HTR1E
cg03024742	441	0.000770681326986299	0.997445872804458	0.998802942019158	SRD5A2	cg01274715	441	-0.00310521537971397	0.998646872254381	0.999950361732759	HTR6	cg19837528	441	-0.00374546566213937	0.996236046694148	0.997591469886929	AVPR1A	cg21224972	441	-0.000810216380381646	0.998025248101298	0.999383105581708	HTR2A	cg01962937	441	0.028216743546506	0.99461791425966	0.995388197519224	H6PD	cg14809166	441	0.000359374075591097	0.999630411376443	0.99982346178521	CRH	cg14734794	441	-0.000896556771398273	0.998314687609212	0.999522133180024	CRH
cg14803762	441	-0.000347768241531824	0.999505955537876	0.999505955537876	CRH	cg20336341	441	4.99902532550524e-05	0.999950361732759	0.999950361732759	TPH2	cg00293936	441	-0.00100786062205827	0.999623212947391	0.999623212947391	HTR6	cg20494779	441	0.00010610424054432	0.999760258409026	0.999760258409026	AVPR1A	cg27051089	441	0.00374068674243193	0.995388197519224	0.995388197519224	COMT	cg22827011	441	-9.67790915126063e-05	0.99982346178521	0.99982346178521	HSD11B2	cg17030679	441	-0.000515098383463588	0.999522133180024	0.999522133180024	HTRA1

## Sheet: SuppTableS2
Supplementary Table S2 - Hypothesis-driven analysis 2 - Literature review, n=92 genes, 3 101 CpGs
b = beta of the association between CpG name and the SDQ subscale
p = p-value; p_fdr = p-value corrected using FDR procedure for multiple tests
Gene = Target gene name(s), from the UCSC database
Total SDQ						Hyperactivity/inattention						Conduct problems						Externalizating symptoms						Emotional symptoms						Peer-Peer-relationships problemsships problems						Internalizating symptoms
CpG_name	n_obs	b	p	p_fdr	Gene	CpG_name	n_obs	b	p	p_fdr	Gene	CpG_name	n_obs	b	p	p_fdr	Gene	CpG_name	n_obs	b	p	p_fdr	Gene	CpG_name	n_obs	b	p	p_fdr	Gene	CpG_name	n_obs	b	p	p_fdr	Gene	CpG_name	n_obs	b	p	p_fdr	Gene
cg00892798	441	1.40823927174578	0.00124369546609281	0.988299141114149	NGFR	cg11864774	441	-1.9158711058749	0.00193645592346758	0.983435427449379	TRERF1	cg19078576	441	7.88319839962015	0.000239522186122942	0.724439223225336	BASP1	cg01556706	441	2.51340701743887	0.000961774746245454	0.999704995015082	GFI1	cg26703534	441	5.84607227605488	1.06645992358939e-05	0.0330709222305071	AHRR	cg26424993	441	-16.34820472282	0.00139421465031926	0.992627347855936	CYP1A1	cg26703534	441	3.66019287269388	0.000379379676735488	0.704990724040185	AHRR
cg27602981	441	-4.26308402443065	0.00141855362231618	0.988299141114149	ANKRD11	cg24668883	441	-2.32876433118313	0.00283398837983325	0.983435427449379	BASP1	cg15694422	441	-4.97508885527796	0.00046722942484704	0.724439223225336	MGLL	cg24668883	441	-2.13358823273863	0.00117897380822704	0.999704995015082	ANKRD11	cg18501647	441	2.58823192950543	9.13656567225885e-05	0.141662450748373	PRRT1	cg23281529	441	-3.45032065848936	0.00201657942366343	0.992627347855936	RASA3	cg15964018	441	2.58220406273547	0.000717922333639272	0.704990724040185	UBR4
cg24730892	441	-1.21898083203263	0.00229217196777675	0.988299141114149	KCNAB2	cg02283485	441	4.04773872093254	0.00315075205705699	0.983435427449379	ZMIZ1	cg19065314	441	19.1519024848188	0.000882228565592879	0.863827136982396	ABCE1	cg27602981	441	-4.35636502360227	0.00354635518339594	0.999704995015082	COMT	cg24212268	441	4.85778650607289	0.000251357453421503	0.191695189036944	SVIL	cg04026926	441	3.60516778648471	0.00215552603575524	0.992627347855936	TSPAN32	cg16597079	441	5.04383736179634	0.000847458758209287	0.704990724040185	TRERF1
cg13275321	441	1.16644505390287	0.00258979299822737	0.988299141114149	AHRR	cg02189017	441	1.4816413403422	0.00333766225505132	0.983435427449379	VIPR2	cg05929675	441	1.75762262483104	0.00122667339669596	0.863827136982396	CREB5	cg19065314	441	14.6633763460342	0.00364628383200084	0.999704995015082	LPAR5	cg06039074	441	5.23686651571926	0.000253469954667542	0.191695189036944	ANKRD11	cg05767720	441	-2.62350254588105	0.00268596867087779	0.992627347855936	PRRT1	cg06809295	441	4.22926721442789	0.00108109069966754	0.704990724040185	KCNQ1OT1
cg24668883	441	-1.73839723881831	0.0028594669783858	0.988299141114149	BASP1	cg01556706	441	2.56564393604628	0.0042349149589242	0.983435427449379	FHIT	cg14994247	441	2.0173876103077	0.00162699163063951	0.863827136982396	SLC6A3	cg05786278	441	0.929176277422209	0.00756829082007083	0.999704995015082	FHIT	cg16597079	441	6.7796357572369	0.000309086083581013	0.191695189036944	TRERF1	cg03758732	441	1.83615587162699	0.00344201157319355	0.992627347855936	MYT1L	cg06585893	441	3.83983652170714	0.00113671513066783	0.704990724040185	CAPN9
cg17473782	441	1.02011361138845	0.00295963897160971	0.988299141114149	RASA3	cg24730892	441	-1.56459344487396	0.0045605411293869	0.983435427449379	KCNAB2	cg25486571	441	1.18292275867057	0.00167138433469667	0.863827136982396	RASA3	cg19544065	441	1.35232227287126	0.00773195738750924	0.999704995015082	RASA3	cg02328223	441	-20.0381609850226	0.000440455317617103	0.213358935547174	MGLL	cg21163347	441	-3.15739114819419	0.00491130984495627	0.992627347855936	SLC6A3	cg07852840	441	-4.9955823625965	0.00148046700113356	0.743632405319283	SPSB4
cg04026926	441	1.68647980616059	0.003923040934564	0.988299141114149	TSPAN32	cg02097532	441	3.7949862898972	0.00486496280883883	0.983435427449379	ERC2	cg22865176	441	1.28419852609389	0.00222524177257073	0.904498853758312	MYT1L	cg22350910	441	0.790976611977164	0.00896627953335885	0.999704995015082	ACTN1	cg08858540	441	2.49505657985982	0.000502720448951489	0.213358935547174	AHRR	cg04835638	441	-4.19534971089831	0.00608938263238841	0.992627347855936	FHIT	cg04958055	441	3.57259195725974	0.00170889341245251	0.743632405319283	ACTN1
cg24064173	441	1.05148734360246	0.0042022539981792	0.988299141114149	RASA3	cg25049733	441	1.94894695643891	0.00569501567215541	0.983435427449379	GMDS	cg26546229	441	-8.25057095695071	0.00233343786845098	0.904498853758312	ANKRD11	cg14699932	441	1.04953822231676	0.00917070713294769	0.999704995015082	SVIL	cg11218385	441	1.17248766702641	0.000550426147815994	0.213358935547174	ADCYAP1R1	cg22897615	441	-0.874231720732793	0.0063056511133211	0.992627347855936	PRRT1	cg14750757	441	3.61478435789725	0.00196761030926254	0.743632405319283	MGLL
cg07852840	441	-2.76677819428735	0.00585016343563987	0.988299141114149	SPSB4	cg18532273	441	0.956095544027966	0.00580819789017076	0.983435427449379	RASA3	cg21004899	441	1.36397284194908	0.00376450386361768	0.998336511985087	CREB5	cg00149976	441	10.6961241326669	0.0097630913624947	0.999704995015082	ST3GAL3	cg01097768	441	2.90635136983223	0.000727796613767684	0.250766366588176	AHRR	cg24066980	441	-1.45775369338771	0.00654838081583543	0.992627347855936	MYT1L	cg01097768	441	2.10992179853567	0.00215823658428686	0.743632405319283	AHRR
cg14750757	441	2.06478260590427	0.00598116604156354	0.988299141114149	MGLL	cg05786278	441	1.15276901106279	0.00586122860161864	0.983435427449379	MYT1L	cg16321030	441	-4.6029990021806	0.00491437646429185	0.998336511985087	SSBP3	cg12157761	441	2.44242217142713	0.0099301453642869	0.999704995015082	VIPR2	cg15964018	441	3.13729818160793	0.000846597160242855	0.262529779391309	UBR4	cg09220891	441	-3.23315589689678	0.0072991571489604	0.992627347855936	ANKRD11	cg03758732	441	1.44588943902018	0.00294463678873167	0.893998804549607	MYT1L
cg14994247	441	1.33601451908565	0.00658173328691306	0.988299141114149	SLC6A3	cg00582663	441	2.04748055077439	0.00625211903573789	0.983435427449379	CHD3	cg14699932	441	1.26895043648777	0.00557544378304091	0.998336511985087	RASA3	cg22865176	441	0.942848583591295	0.0100542836019512	0.999704995015082	CHRNA3	cg04141806	441	2.06870444282983	0.00133900557679436	0.334703300461173	AHRR	cg06585893	441	4.05486838859849	0.00790896391602746	0.992627347855936	CAPN9	cg20543426	441	2.10753729130249	0.00346685374162244	0.893998804549607	ERC2
cg26703534	441	1.75296390364391	0.00680321574224697	0.988299141114149	AHRR	cg25972205	441	2.11187077153547	0.00649327071271441	0.983435427449379	VIPR2	cg05714552	441	-2.64184810088	0.00568621499738357	0.998336511985087	PRRT1	cg25486571	441	0.842648183041937	0.0102623488622854	0.999704995015082	NGFR	cg22356527	441	2.15427116615668	0.00133978986607041	0.334703300461173	AHRR	cg11945824	441	-0.948039727247145	0.00793182572516746	0.992627347855936	PRRT1	cg07430820	441	2.65991493722863	0.00477591373155506	0.893998804549607	CHD3
cg18532273	441	0.689233102387384	0.00700769078299499	0.988299141114149	RASA3	cg00190162	441	1.64954232513853	0.00700375089557728	0.983435427449379	VIPR2	cg12561474	441	-6.98319939071536	0.00660417788459462	0.998336511985087	NGFR	cg21893960	441	0.902292001762739	0.0104253960290595	0.999704995015082	RASA3	cg00066663	441	3.64180716914732	0.00140314185939866	0.334703300461173	CHD3	cg13259177	441	1.79183084728841	0.00813997005635125	0.992627347855936	RASA3	cg07123182	441	2.86597811318382	0.00497854458564362	0.893998804549607	KCNQ1OT1
cg07798593	441	2.16611652649327	0.00709364804460923	0.988299141114149	ZMIZ1	cg04934870	441	3.40033113050838	0.0072012268141433	0.983435427449379	SKI	cg21893960	441	1.08669883446358	0.00673129301211039	0.998336511985087	RASA3	cg19078576	441	4.99159135227155	0.0106000506638625	0.999704995015082	TPH2	cg07430820	441	3.58605683280095	0.00208795501352901	0.447650413113502	CHD3	cg15731035	441	-2.92733938014758	0.00832717761442487	0.992627347855936	KCNAB2	cg18501647	441	1.46398081366486	0.00623957032442714	0.893998804549607	PRRT1
cg22511877	441	0.415866909728171	0.00744515947378518	0.988299141114149	MYT1L	cg27602981	441	-4.68804032345816	0.00796226747537403	0.983435427449379	ANKRD11	cg04155862	441	5.48593050315279	0.00682791376107061	0.998336511985087	MGLL	cg24730892	441	-1.16669833744327	0.0108259030683829	0.999704995015082	ANKRD11	cg01746503	441	6.09540709307076	0.00230303462185567	0.447650413113502	SLC7A8	cg06368590	441	-2.34572438251247	0.00835643857974501	0.992627347855936	TRPS1	cg00892798	441	1.89788254134975	0.00627568887344268	0.893998804549607	NGFR
cg08942499	441	-2.65663368379204	0.00807083774105083	0.988299141114149	SKI	cg18048071	441	2.87254632146509	0.00833010364936325	0.983435427449379	VIPR2	cg02839071	441	-4.03869545931656	0.00703377457478976	0.998336511985087	APCDD1	cg13275321	441	1.12976668998488	0.0110151021115547	0.999704995015082	MAFK	cg13186559	441	3.48183218185846	0.00230970867778653	0.447650413113502	ZMIZ1	cg25136495	441	-2.36648045191941	0.00880295440371404	0.992627347855936	LPAR5	cg16521443	441	1.15304632304849	0.0067003862401102	0.893998804549607	RASA3
cg20478291	441	0.821250402346103	0.00810803599693385	0.988299141114149	RASA3	cg19963589	441	1.8866897524466	0.00904703075856724	0.983435427449379	SSBP3	cg16088380	441	0.994054612688906	0.00707869169204704	0.998336511985087	RASA3	cg26546229	441	-5.99955739631611	0.0116490372459214	0.999704995015082	ZNF544	cg05504729	441	2.9022016440142	0.00252034862916491	0.452146216739732	ANKRD11	cg08942499	441	-5.26819156554636	0.00891474070274539	0.992627347855936	SKI	cg04206572	441	0.977022924835666	0.00714732912570364	0.893998804549607	RASA3
cg12338176	441	1.27503591040905	0.00842179418965388	0.988299141114149	RBX1	cg03162686	441	1.55571764491414	0.00951940317384624	0.983435427449379	ANKRD11	cg17985533	441	1.61158638720994	0.00710974713330803	0.998336511985087	H19	cg16257091	441	0.517522463183714	0.0118082812104823	0.999704995015082	C11orf21	cg14744022	441	3.41258769749438	0.00262451851058213	0.452146216739732	AHRR	cg24125828	441	-1.70676522731738	0.00989767331609017	0.992627347855936	PRRT1	cg04026926	441	2.48285629425535	0.00727225770077693	0.893998804549607	TSPAN32
cg09888049	441	0.934276366804397	0.00892880016751282	0.988299141114149	RASA3	cg18425653	441	1.358190282842	0.00979166164792174	0.983435427449379	VIPR2	cg16707062	441	6.56892859472363	0.00713752960325849	0.998336511985087	GFI1	cg24064173	441	1.04653431387922	0.0120558903231912	0.999704995015082	ANKRD11	cg21661983	441	2.93518195036961	0.00295506008947704	0.47724486295112	TPH2	cg09832244	441	-2.55768288336933	0.0100402615514955	0.992627347855936	LPAR5	cg02043769	441	5.59649977176124	0.00738280079564713	0.893998804549607	SLC7A8
[truncated: 3,082 more rows]

## Sheet: SuppTableS3
Supplementary Table S3- Genes' description and functions
* Source: Gene Cards (https://www.genecards.org/)
** Source : The Human Protein Atlas (https://www.proteinatlas.org/)
[truncated: 13 more rows]

## Sheet: SuppTableS4
Supplementary Table S4 – Epigenome Wide Association Study (EWAS) - Top 100 CpGs with the smallest p-values - Unstratified analyses, n=441
[truncated: 105 more rows]

[truncated: 12 more sheets: SuppTableS5, SuppTableS6, SuppTableS7, SuppTableS8, SuppTableS9, SuppTableS10, SuppTableS11, SuppTableS12, SuppTableS13, SuppTableS14, SuppTableS15, SuppTableS16]
